# Supplementary material for: Gene Set-Based Functionome Analysis of Pathogenesis in Epithelial Ovarian Serous Carcinoma and the Molecular Features in Different FIGO Stages
Source: Int J Mol Sci. 2016 Jun 6;17(6):886. doi: 10.3390/ijms17060886 (PMC4926420; doi:10.3390/ijms17060886)
Supplement: Supplementary file 1 [file ijms-17-00886-s001.xls]

## Sheet: Figure S1
Figure S1. Full figure of the tree of deregulated GO terms from the results of the exploratory factor analysis of serous carcinoma.

## Sheet: Table S1
Table S1. Sample information.
Title	Organism	cancer	group	FIGO stage	Plateform	Series	FTP	Accession	ID
ovarian	Homo sapiens	serous	S1	1	GPL570	GSE44104	ftp://ftp.ncbi.nlm.nih.gov/geo/samples/GSM1079nnn/GSM1079007/	GSM1079007	301079007
ovarian	Homo sapiens	serous	S1	1	GPL570	GSE44104	ftp://ftp.ncbi.nlm.nih.gov/geo/samples/GSM1079nnn/GSM1079006/	GSM1079006	301079006
ovarian	Homo sapiens	serous	S1	1	GPL570	GSE20565	ftp://ftp.ncbi.nlm.nih.gov/geo/samples/GSM516nnn/GSM516805/	GSM516805	300516805
ovarian	Homo sapiens	serous	S1	1	GPL570	GSE20565	ftp://ftp.ncbi.nlm.nih.gov/geo/samples/GSM516nnn/GSM516697/	GSM516697	300516697
ovarian	Homo sapiens	serous	S1	1	GPL570	GSE26193	ftp://ftp.ncbi.nlm.nih.gov/geo/samples/GSM642nnn/GSM642967/	GSM642967	300642967
ovarian	Homo sapiens	serous	S1	1	GPL570	GSE26193	ftp://ftp.ncbi.nlm.nih.gov/geo/samples/GSM642nnn/GSM642946/	GSM642946	300642946
ovarian	Homo sapiens	serous	S1	1	GPL570	GSE20565	ftp://ftp.ncbi.nlm.nih.gov/geo/samples/GSM516nnn/GSM516733/	GSM516733	300516733
ovarian	Homo sapiens	serous	S1	1	GPL570	GSE20565	ftp://ftp.ncbi.nlm.nih.gov/geo/samples/GSM516nnn/GSM516688/	GSM516688	300516688
ovarian	Homo sapiens	serous	S1	1	GPL570	GSE20565	ftp://ftp.ncbi.nlm.nih.gov/geo/samples/GSM516nnn/GSM516687/	GSM516687	300516687
ovarian	Homo sapiens	serous	S1	1	GPL570	GSE20565	ftp://ftp.ncbi.nlm.nih.gov/geo/samples/GSM516nnn/GSM516678/	GSM516678	300516678
ovarian	Homo sapiens	serous	S1	1	GPL570	GSE12172	ftp://ftp.ncbi.nlm.nih.gov/geo/samples/GSM306nnn/GSM306209/	GSM306209	300306209
ovarian	Homo sapiens	serous	S1	1	GPL570	GSE26193	ftp://ftp.ncbi.nlm.nih.gov/geo/samples/GSM642nnn/GSM642984/	GSM642984	300642984
ovarian	Homo sapiens	serous	S1	1	GPL570	GSE26193	ftp://ftp.ncbi.nlm.nih.gov/geo/samples/GSM642nnn/GSM642980/	GSM642980	300642980
ovarian	Homo sapiens	serous	S1	1	GPL570	GSE26193	ftp://ftp.ncbi.nlm.nih.gov/geo/samples/GSM642nnn/GSM642941/	GSM642941	300642941
ovarian	Homo sapiens	serous	S1	1	GPL570	GSE26193	ftp://ftp.ncbi.nlm.nih.gov/geo/samples/GSM642nnn/GSM642940/	GSM642940	300642940
ovarian	Homo sapiens	serous	S1	1	GPL570	GSE26193	ftp://ftp.ncbi.nlm.nih.gov/geo/samples/GSM642nnn/GSM642933/	GSM642933	300642933
ovarian	Homo sapiens	serous	S1	1	GPL570	GSE20565	ftp://ftp.ncbi.nlm.nih.gov/geo/samples/GSM516nnn/GSM516813/	GSM516813	300516813
ovarian	Homo sapiens	serous	S1	1	GPL570	GSE20565	ftp://ftp.ncbi.nlm.nih.gov/geo/samples/GSM516nnn/GSM516780/	GSM516780	300516780
ovarian	Homo sapiens	serous	S1	1	GPL570	GSE20565	ftp://ftp.ncbi.nlm.nih.gov/geo/samples/GSM516nnn/GSM516706/	GSM516706	300516706
ovarian	Homo sapiens	serous	S1	1	GPL570	GSE12172	ftp://ftp.ncbi.nlm.nih.gov/geo/samples/GSM306nnn/GSM306208/	GSM306208	300306208
ovarian	Homo sapiens	serous	S1	1	GPL570	GSE26193	ftp://ftp.ncbi.nlm.nih.gov/geo/samples/GSM643nnn/GSM643037/	GSM643037	300643037
ovarian	Homo sapiens	serous	S1	1	GPL570	GSE26193	ftp://ftp.ncbi.nlm.nih.gov/geo/samples/GSM642nnn/GSM642957/	GSM642957	300642957
ovarian	Homo sapiens	serous	S1	1	GPL7264	GSE51088	ftp://ftp.ncbi.nlm.nih.gov/geo/samples/GSM1238nnn/GSM1238203/	GSM1238203	301238203
ovarian	Homo sapiens	serous	S1	1	GPL7264	GSE51088	ftp://ftp.ncbi.nlm.nih.gov/geo/samples/GSM1238nnn/GSM1238191/	GSM1238191	301238191
ovarian	Homo sapiens	serous	S1	1	GPL7264	GSE51088	ftp://ftp.ncbi.nlm.nih.gov/geo/samples/GSM1238nnn/GSM1238246/	GSM1238246	301238246
ovarian	Homo sapiens	serous	S1	1	GPL7264	GSE51088	ftp://ftp.ncbi.nlm.nih.gov/geo/samples/GSM1238nnn/GSM1238210/	GSM1238210	301238210
ovarian	Homo sapiens	serous	S1	1	GPL7264	GSE51088	ftp://ftp.ncbi.nlm.nih.gov/geo/samples/GSM1238nnn/GSM1238219/	GSM1238219	301238219
ovarian	Homo sapiens	serous	S1	1	GPL7264	GSE51088	ftp://ftp.ncbi.nlm.nih.gov/geo/samples/GSM1238nnn/GSM1238164/	GSM1238164	301238164
ovarian	Homo sapiens	serous	S1	1	GPL96	GSE6008	ftp://ftp.ncbi.nlm.nih.gov/geo/samples/GSM139nnn/GSM139455/	GSM139455	300139455
ovarian	Homo sapiens	serous	S1	1	GPL96	GSE14764	ftp://ftp.ncbi.nlm.nih.gov/geo/samples/GSM368nnn/GSM368667/	GSM368667	300368667
ovarian	Homo sapiens	serous	S1	1	GPL96	GSE6008	ftp://ftp.ncbi.nlm.nih.gov/geo/samples/GSM139nnn/GSM139468/	GSM139468	300139468
ovarian	Homo sapiens	serous	S1	1	GPL96	GSE6008	ftp://ftp.ncbi.nlm.nih.gov/geo/samples/GSM139nnn/GSM139464/	GSM139464	300139464
ovarian	Homo sapiens	serous	S1	1	GPL96	GSE6008	ftp://ftp.ncbi.nlm.nih.gov/geo/samples/GSM139nnn/GSM139444/	GSM139444	300139444
ovarian	Homo sapiens	serous	S1	1	GPL96	GSE14764	ftp://ftp.ncbi.nlm.nih.gov/geo/samples/GSM368nnn/GSM368682/	GSM368682	300368682
ovarian	Homo sapiens	serous	S2	2	GPL570	GSE51373	ftp://ftp.ncbi.nlm.nih.gov/geo/samples/GSM1243nnn/GSM1243895/	GSM1243895	301243895
ovarian	Homo sapiens	serous	S2	2	GPL570	GSE44104	ftp://ftp.ncbi.nlm.nih.gov/geo/samples/GSM1079nnn/GSM1079027/	GSM1079027	301079027
ovarian	Homo sapiens	serous	S2	2	GPL570	GSE44104	ftp://ftp.ncbi.nlm.nih.gov/geo/samples/GSM1079nnn/GSM1079025/	GSM1079025	301079025
ovarian	Homo sapiens	serous	S2	2	GPL570	GSE26193	ftp://ftp.ncbi.nlm.nih.gov/geo/samples/GSM642nnn/GSM642987/	GSM642987	300642987
ovarian	Homo sapiens	serous	S2	2	GPL570	GSE20565	ftp://ftp.ncbi.nlm.nih.gov/geo/samples/GSM516nnn/GSM516811/	GSM516811	300516811
ovarian	Homo sapiens	serous	S2	2	GPL570	GSE55512	ftp://ftp.ncbi.nlm.nih.gov/geo/samples/GSM1338nnn/GSM1338410/	GSM1338410	301338410
ovarian	Homo sapiens	serous	S2	2	GPL570	GSE51373	ftp://ftp.ncbi.nlm.nih.gov/geo/samples/GSM1243nnn/GSM1243898/	GSM1243898	301243898
ovarian	Homo sapiens	serous	S2	2	GPL570	GSE26193	ftp://ftp.ncbi.nlm.nih.gov/geo/samples/GSM643nnn/GSM643036/	GSM643036	300643036
ovarian	Homo sapiens	serous	S2	2	GPL570	GSE63885	ftp://ftp.ncbi.nlm.nih.gov/geo/samples/GSM1559nnn/GSM1559371/	GSM1559371	301559371
ovarian	Homo sapiens	serous	S2	2	GPL570	GSE20565	ftp://ftp.ncbi.nlm.nih.gov/geo/samples/GSM516nnn/GSM516755/	GSM516755	300516755
ovarian	Homo sapiens	serous	S2	2	GPL570	GSE20565	ftp://ftp.ncbi.nlm.nih.gov/geo/samples/GSM516nnn/GSM516731/	GSM516731	300516731
ovarian	Homo sapiens	serous	S2	2	GPL570	GSE20565	ftp://ftp.ncbi.nlm.nih.gov/geo/samples/GSM516nnn/GSM516694/	GSM516694	300516694
ovarian	Homo sapiens	serous	S2	2	GPL570	GSE51373	ftp://ftp.ncbi.nlm.nih.gov/geo/samples/GSM1243nnn/GSM1243893/	GSM1243893	301243893
ovarian	Homo sapiens	serous	S2	2	GPL570	GSE51373	ftp://ftp.ncbi.nlm.nih.gov/geo/samples/GSM1243nnn/GSM1243886/	GSM1243886	301243886
ovarian	Homo sapiens	serous	S2	2	GPL570	GSE26193	ftp://ftp.ncbi.nlm.nih.gov/geo/samples/GSM642nnn/GSM642994/	GSM642994	300642994
ovarian	Homo sapiens	serous	S2	2	GPL570	GSE26193	ftp://ftp.ncbi.nlm.nih.gov/geo/samples/GSM642nnn/GSM642979/	GSM642979	300642979
ovarian	Homo sapiens	serous	S2	2	GPL570	GSE26193	ftp://ftp.ncbi.nlm.nih.gov/geo/samples/GSM642nnn/GSM642945/	GSM642945	300642945
ovarian	Homo sapiens	serous	S2	2	GPL570	GSE63885	ftp://ftp.ncbi.nlm.nih.gov/geo/samples/GSM1559nnn/GSM1559351/	GSM1559351	301559351
ovarian	Homo sapiens	serous	S2	2	GPL570	GSE20565	ftp://ftp.ncbi.nlm.nih.gov/geo/samples/GSM516nnn/GSM516789/	GSM516789	300516789
ovarian	Homo sapiens	serous	S2	2	GPL570	GSE12172	ftp://ftp.ncbi.nlm.nih.gov/geo/samples/GSM306nnn/GSM306179/	GSM306179	300306179
ovarian	Homo sapiens	serous	S2	2	GPL570	GSE12172	ftp://ftp.ncbi.nlm.nih.gov/geo/samples/GSM306nnn/GSM306170/	GSM306170	300306170
ovarian	Homo sapiens	serous	S2	2	GPL570	GSE55512	ftp://ftp.ncbi.nlm.nih.gov/geo/samples/GSM1338nnn/GSM1338405/	GSM1338405	301338405
ovarian	Homo sapiens	serous	S2	2	GPL570	GSE51373	ftp://ftp.ncbi.nlm.nih.gov/geo/samples/GSM1243nnn/GSM1243885/	GSM1243885	301243885
ovarian	Homo sapiens	serous	S2	2	GPL570	GSE26193	ftp://ftp.ncbi.nlm.nih.gov/geo/samples/GSM643nnn/GSM643022/	GSM643022	300643022
ovarian	Homo sapiens	serous	S2	2	GPL6480	GSE53963	ftp://ftp.ncbi.nlm.nih.gov/geo/samples/GSM1304nnn/GSM1304275/	GSM1304275	301304275
ovarian	Homo sapiens	serous	S2	2	GPL6480	GSE53963	ftp://ftp.ncbi.nlm.nih.gov/geo/samples/GSM1304nnn/GSM1304386/	GSM1304386	301304386
ovarian	Homo sapiens	serous	S2	2	GPL6480	GSE53963	ftp://ftp.ncbi.nlm.nih.gov/geo/samples/GSM1304nnn/GSM1304295/	GSM1304295	301304295
ovarian	Homo sapiens	serous	S2	2	GPL6480	GSE53963	ftp://ftp.ncbi.nlm.nih.gov/geo/samples/GSM1304nnn/GSM1304279/	GSM1304279	301304279
ovarian	Homo sapiens	serous	S2	2	GPL6480	GSE53963	ftp://ftp.ncbi.nlm.nih.gov/geo/samples/GSM1304nnn/GSM1304246/	GSM1304246	301304246
ovarian	Homo sapiens	serous	S2	2	GPL6480	GSE53963	ftp://ftp.ncbi.nlm.nih.gov/geo/samples/GSM1304nnn/GSM1304418/	GSM1304418	301304418
ovarian	Homo sapiens	serous	S2	2	GPL6480	GSE53963	ftp://ftp.ncbi.nlm.nih.gov/geo/samples/GSM1304nnn/GSM1304361/	GSM1304361	301304361
ovarian	Homo sapiens	serous	S2	2	GPL6480	GSE53963	ftp://ftp.ncbi.nlm.nih.gov/geo/samples/GSM1304nnn/GSM1304328/	GSM1304328	301304328
ovarian	Homo sapiens	serous	S2	2	GPL7264	GSE51088	ftp://ftp.ncbi.nlm.nih.gov/geo/samples/GSM1238nnn/GSM1238292/	GSM1238292	301238292
ovarian	Homo sapiens	serous	S2	2	GPL7264	GSE51088	ftp://ftp.ncbi.nlm.nih.gov/geo/samples/GSM1238nnn/GSM1238285/	GSM1238285	301238285
ovarian	Homo sapiens	serous	S2	2	GPL7264	GSE51088	ftp://ftp.ncbi.nlm.nih.gov/geo/samples/GSM1238nnn/GSM1238163/	GSM1238163	301238163
ovarian	Homo sapiens	serous	S2	2	GPL96	GSE6008	ftp://ftp.ncbi.nlm.nih.gov/geo/samples/GSM139nnn/GSM139457/	GSM139457	300139457
ovarian	Homo sapiens	serous	S2	2	GPL96	GSE6008	ftp://ftp.ncbi.nlm.nih.gov/geo/samples/GSM139nnn/GSM139465/	GSM139465	300139465
ovarian	Homo sapiens	serous	S2	2	GPL96	GSE6008	ftp://ftp.ncbi.nlm.nih.gov/geo/samples/GSM139nnn/GSM139446/	GSM139446	300139446
ovarian	Homo sapiens	serous	S2	2	GPL96	GSE14764	ftp://ftp.ncbi.nlm.nih.gov/geo/samples/GSM368nnn/GSM368677/	GSM368677	300368677
ovarian	Homo sapiens	serous	S3	3	GPL570	GSE12172	ftp://ftp.ncbi.nlm.nih.gov/geo/samples/GSM306nnn/GSM306161/	GSM306161	300306161
ovarian	Homo sapiens	serous	S3	3	GPL570	GSE51373	ftp://ftp.ncbi.nlm.nih.gov/geo/samples/GSM1243nnn/GSM1243904/	GSM1243904	301243904
ovarian	Homo sapiens	serous	S3	3	GPL570	GSE44104	ftp://ftp.ncbi.nlm.nih.gov/geo/samples/GSM1079nnn/GSM1079031/	GSM1079031	301079031
ovarian	Homo sapiens	serous	S3	3	GPL570	GSE44104	ftp://ftp.ncbi.nlm.nih.gov/geo/samples/GSM1079nnn/GSM1079029/	GSM1079029	301079029
ovarian	Homo sapiens	serous	S3	3	GPL570	GSE44104	ftp://ftp.ncbi.nlm.nih.gov/geo/samples/GSM1079nnn/GSM1079028/	GSM1079028	301079028
ovarian	Homo sapiens	serous	S3	3	GPL570	GSE44104	ftp://ftp.ncbi.nlm.nih.gov/geo/samples/GSM1079nnn/GSM1079024/	GSM1079024	301079024
ovarian	Homo sapiens	serous	S3	3	GPL570	GSE44104	ftp://ftp.ncbi.nlm.nih.gov/geo/samples/GSM1079nnn/GSM1079023/	GSM1079023	301079023
ovarian	Homo sapiens	serous	S3	3	GPL570	GSE44104	ftp://ftp.ncbi.nlm.nih.gov/geo/samples/GSM1079nnn/GSM1079022/	GSM1079022	301079022
ovarian	Homo sapiens	serous	S3	3	GPL570	GSE44104	ftp://ftp.ncbi.nlm.nih.gov/geo/samples/GSM1079nnn/GSM1079021/	GSM1079021	301079021
ovarian	Homo sapiens	serous	S3	3	GPL570	GSE44104	ftp://ftp.ncbi.nlm.nih.gov/geo/samples/GSM1079nnn/GSM1079020/	GSM1079020	301079020
ovarian	Homo sapiens	serous	S3	3	GPL570	GSE44104	ftp://ftp.ncbi.nlm.nih.gov/geo/samples/GSM1079nnn/GSM1079019/	GSM1079019	301079019
ovarian	Homo sapiens	serous	S3	3	GPL570	GSE44104	ftp://ftp.ncbi.nlm.nih.gov/geo/samples/GSM1079nnn/GSM1079018/	GSM1079018	301079018
ovarian	Homo sapiens	serous	S3	3	GPL570	GSE44104	ftp://ftp.ncbi.nlm.nih.gov/geo/samples/GSM1079nnn/GSM1079017/	GSM1079017	301079017
ovarian	Homo sapiens	serous	S3	3	GPL570	GSE44104	ftp://ftp.ncbi.nlm.nih.gov/geo/samples/GSM1079nnn/GSM1079016/	GSM1079016	301079016
ovarian	Homo sapiens	serous	S3	3	GPL570	GSE44104	ftp://ftp.ncbi.nlm.nih.gov/geo/samples/GSM1079nnn/GSM1079015/	GSM1079015	301079015
ovarian	Homo sapiens	serous	S3	3	GPL570	GSE44104	ftp://ftp.ncbi.nlm.nih.gov/geo/samples/GSM1079nnn/GSM1079014/	GSM1079014	301079014
ovarian	Homo sapiens	serous	S3	3	GPL570	GSE44104	ftp://ftp.ncbi.nlm.nih.gov/geo/samples/GSM1079nnn/GSM1079013/	GSM1079013	301079013
ovarian	Homo sapiens	serous	S3	3	GPL570	GSE44104	ftp://ftp.ncbi.nlm.nih.gov/geo/samples/GSM1079nnn/GSM1079012/	GSM1079012	301079012
ovarian	Homo sapiens	serous	S3	3	GPL570	GSE44104	ftp://ftp.ncbi.nlm.nih.gov/geo/samples/GSM1079nnn/GSM1079011/	GSM1079011	301079011
ovarian	Homo sapiens	serous	S3	3	GPL570	GSE44104	ftp://ftp.ncbi.nlm.nih.gov/geo/samples/GSM1079nnn/GSM1079010/	GSM1079010	301079010
ovarian	Homo sapiens	serous	S3	3	GPL570	GSE44104	ftp://ftp.ncbi.nlm.nih.gov/geo/samples/GSM1079nnn/GSM1079009/	GSM1079009	301079009
ovarian	Homo sapiens	serous	S3	3	GPL570	GSE44104	ftp://ftp.ncbi.nlm.nih.gov/geo/samples/GSM1079nnn/GSM1079008/	GSM1079008	301079008
ovarian	Homo sapiens	serous	S3	3	GPL570	GSE44104	ftp://ftp.ncbi.nlm.nih.gov/geo/samples/GSM1079nnn/GSM1079005/	GSM1079005	301079005
ovarian	Homo sapiens	serous	S3	3	GPL570	GSE44104	ftp://ftp.ncbi.nlm.nih.gov/geo/samples/GSM1079nnn/GSM1079004/	GSM1079004	301079004
ovarian	Homo sapiens	serous	S3	3	GPL570	GSE63885	ftp://ftp.ncbi.nlm.nih.gov/geo/samples/GSM1559nnn/GSM1559362/	GSM1559362	301559362
ovarian	Homo sapiens	serous	S3	3	GPL570	GSE63885	ftp://ftp.ncbi.nlm.nih.gov/geo/samples/GSM1559nnn/GSM1559355/	GSM1559355	301559355
ovarian	Homo sapiens	serous	S3	3	GPL570	GSE63885	ftp://ftp.ncbi.nlm.nih.gov/geo/samples/GSM1559nnn/GSM1559346/	GSM1559346	301559346
ovarian	Homo sapiens	serous	S3	3	GPL570	GSE63885	ftp://ftp.ncbi.nlm.nih.gov/geo/samples/GSM1559nnn/GSM1559307/	GSM1559307	301559307
ovarian	Homo sapiens	serous	S3	3	GPL570	GSE20565	ftp://ftp.ncbi.nlm.nih.gov/geo/samples/GSM516nnn/GSM516787/	GSM516787	300516787
ovarian	Homo sapiens	serous	S3	3	GPL570	GSE20565	ftp://ftp.ncbi.nlm.nih.gov/geo/samples/GSM516nnn/GSM516771/	GSM516771	300516771
ovarian	Homo sapiens	serous	S3	3	GPL570	GSE12172	ftp://ftp.ncbi.nlm.nih.gov/geo/samples/GSM306nnn/GSM306194/	GSM306194	300306194
ovarian	Homo sapiens	serous	S3	3	GPL570	GSE12172	ftp://ftp.ncbi.nlm.nih.gov/geo/samples/GSM306nnn/GSM306164/	GSM306164	300306164
ovarian	Homo sapiens	serous	S3	3	GPL570	GSE51373	ftp://ftp.ncbi.nlm.nih.gov/geo/samples/GSM1243nnn/GSM1243900/	GSM1243900	301243900
ovarian	Homo sapiens	serous	S3	3	GPL570	GSE51373	ftp://ftp.ncbi.nlm.nih.gov/geo/samples/GSM1243nnn/GSM1243890/	GSM1243890	301243890
ovarian	Homo sapiens	serous	S3	3	GPL570	GSE51373	ftp://ftp.ncbi.nlm.nih.gov/geo/samples/GSM1243nnn/GSM1243889/	GSM1243889	301243889
ovarian	Homo sapiens	serous	S3	3	GPL570	GSE51373	ftp://ftp.ncbi.nlm.nih.gov/geo/samples/GSM1243nnn/GSM1243887/	GSM1243887	301243887
ovarian	Homo sapiens	serous	S3	3	GPL570	GSE26193	ftp://ftp.ncbi.nlm.nih.gov/geo/samples/GSM643nnn/GSM643020/	GSM643020	300643020
ovarian	Homo sapiens	serous	S3	3	GPL570	GSE26193	ftp://ftp.ncbi.nlm.nih.gov/geo/samples/GSM643nnn/GSM643007/	GSM643007	300643007
ovarian	Homo sapiens	serous	S3	3	GPL570	GSE30161	ftp://ftp.ncbi.nlm.nih.gov/geo/samples/GSM746nnn/GSM746903/	GSM746903	300746903
ovarian	Homo sapiens	serous	S3	3	GPL570	GSE30161	ftp://ftp.ncbi.nlm.nih.gov/geo/samples/GSM746nnn/GSM746890/	GSM746890	300746890
ovarian	Homo sapiens	serous	S3	3	GPL570	GSE30161	ftp://ftp.ncbi.nlm.nih.gov/geo/samples/GSM746nnn/GSM746879/	GSM746879	300746879
ovarian	Homo sapiens	serous	S3	3	GPL570	GSE30161	ftp://ftp.ncbi.nlm.nih.gov/geo/samples/GSM746nnn/GSM746866/	GSM746866	300746866
ovarian	Homo sapiens	serous	S3	3	GPL570	GSE63885	ftp://ftp.ncbi.nlm.nih.gov/geo/samples/GSM1559nnn/GSM1559369/	GSM1559369	301559369
ovarian	Homo sapiens	serous	S3	3	GPL570	GSE63885	ftp://ftp.ncbi.nlm.nih.gov/geo/samples/GSM1559nnn/GSM1559357/	GSM1559357	301559357
ovarian	Homo sapiens	serous	S3	3	GPL570	GSE63885	ftp://ftp.ncbi.nlm.nih.gov/geo/samples/GSM1559nnn/GSM1559356/	GSM1559356	301559356
ovarian	Homo sapiens	serous	S3	3	GPL570	GSE63885	ftp://ftp.ncbi.nlm.nih.gov/geo/samples/GSM1559nnn/GSM1559354/	GSM1559354	301559354
ovarian	Homo sapiens	serous	S3	3	GPL570	GSE63885	ftp://ftp.ncbi.nlm.nih.gov/geo/samples/GSM1559nnn/GSM1559348/	GSM1559348	301559348
ovarian	Homo sapiens	serous	S3	3	GPL570	GSE63885	ftp://ftp.ncbi.nlm.nih.gov/geo/samples/GSM1559nnn/GSM1559330/	GSM1559330	301559330
ovarian	Homo sapiens	serous	S3	3	GPL570	GSE63885	ftp://ftp.ncbi.nlm.nih.gov/geo/samples/GSM1559nnn/GSM1559321/	GSM1559321	301559321
ovarian	Homo sapiens	serous	S3	3	GPL570	GSE20565	ftp://ftp.ncbi.nlm.nih.gov/geo/samples/GSM516nnn/GSM516750/	GSM516750	300516750
ovarian	Homo sapiens	serous	S3	3	GPL570	GSE12172	ftp://ftp.ncbi.nlm.nih.gov/geo/samples/GSM306nnn/GSM306246/	GSM306246	300306246
ovarian	Homo sapiens	serous	S3	3	GPL570	GSE12172	ftp://ftp.ncbi.nlm.nih.gov/geo/samples/GSM306nnn/GSM306240/	GSM306240	300306240
ovarian	Homo sapiens	serous	S3	3	GPL570	GSE12172	ftp://ftp.ncbi.nlm.nih.gov/geo/samples/GSM306nnn/GSM306219/	GSM306219	300306219
ovarian	Homo sapiens	serous	S3	3	GPL570	GSE12172	ftp://ftp.ncbi.nlm.nih.gov/geo/samples/GSM306nnn/GSM306207/	GSM306207	300306207
ovarian	Homo sapiens	serous	S3	3	GPL570	GSE55512	ftp://ftp.ncbi.nlm.nih.gov/geo/samples/GSM1338nnn/GSM1338406/	GSM1338406	301338406
ovarian	Homo sapiens	serous	S3	3	GPL570	GSE51373	ftp://ftp.ncbi.nlm.nih.gov/geo/samples/GSM1243nnn/GSM1243899/	GSM1243899	301243899
ovarian	Homo sapiens	serous	S3	3	GPL570	GSE51373	ftp://ftp.ncbi.nlm.nih.gov/geo/samples/GSM1243nnn/GSM1243896/	GSM1243896	301243896
ovarian	Homo sapiens	serous	S3	3	GPL570	GSE26193	ftp://ftp.ncbi.nlm.nih.gov/geo/samples/GSM642nnn/GSM642992/	GSM642992	300642992
ovarian	Homo sapiens	serous	S3	3	GPL570	GSE26193	ftp://ftp.ncbi.nlm.nih.gov/geo/samples/GSM642nnn/GSM642988/	GSM642988	300642988
ovarian	Homo sapiens	serous	S3	3	GPL570	GSE30161	ftp://ftp.ncbi.nlm.nih.gov/geo/samples/GSM746nnn/GSM746913/	GSM746913	300746913
ovarian	Homo sapiens	serous	S3	3	GPL570	GSE30161	ftp://ftp.ncbi.nlm.nih.gov/geo/samples/GSM746nnn/GSM746910/	GSM746910	300746910
ovarian	Homo sapiens	serous	S3	3	GPL570	GSE30161	ftp://ftp.ncbi.nlm.nih.gov/geo/samples/GSM746nnn/GSM746907/	GSM746907	300746907
ovarian	Homo sapiens	serous	S3	3	GPL570	GSE30161	ftp://ftp.ncbi.nlm.nih.gov/geo/samples/GSM746nnn/GSM746897/	GSM746897	300746897
ovarian	Homo sapiens	serous	S3	3	GPL570	GSE30161	ftp://ftp.ncbi.nlm.nih.gov/geo/samples/GSM746nnn/GSM746891/	GSM746891	300746891
ovarian	Homo sapiens	serous	S3	3	GPL570	GSE30161	ftp://ftp.ncbi.nlm.nih.gov/geo/samples/GSM746nnn/GSM746882/	GSM746882	300746882
ovarian	Homo sapiens	serous	S3	3	GPL570	GSE23391 GSE23392	ftp://ftp.ncbi.nlm.nih.gov/geo/samples/GSM573nnn/GSM573680/	GSM573680	300573680
ovarian	Homo sapiens	serous	S3	3	GPL570	GSE23391 GSE23392	ftp://ftp.ncbi.nlm.nih.gov/geo/samples/GSM573nnn/GSM573679/	GSM573679	300573679
ovarian	Homo sapiens	serous	S3	3	GPL570	GSE63885	ftp://ftp.ncbi.nlm.nih.gov/geo/samples/GSM1559nnn/GSM1559373/	GSM1559373	301559373
ovarian	Homo sapiens	serous	S3	3	GPL570	GSE63885	ftp://ftp.ncbi.nlm.nih.gov/geo/samples/GSM1559nnn/GSM1559372/	GSM1559372	301559372
ovarian	Homo sapiens	serous	S3	3	GPL570	GSE63885	ftp://ftp.ncbi.nlm.nih.gov/geo/samples/GSM1559nnn/GSM1559370/	GSM1559370	301559370
ovarian	Homo sapiens	serous	S3	3	GPL570	GSE63885	ftp://ftp.ncbi.nlm.nih.gov/geo/samples/GSM1559nnn/GSM1559368/	GSM1559368	301559368
ovarian	Homo sapiens	serous	S3	3	GPL570	GSE63885	ftp://ftp.ncbi.nlm.nih.gov/geo/samples/GSM1559nnn/GSM1559367/	GSM1559367	301559367
ovarian	Homo sapiens	serous	S3	3	GPL570	GSE63885	ftp://ftp.ncbi.nlm.nih.gov/geo/samples/GSM1559nnn/GSM1559366/	GSM1559366	301559366
ovarian	Homo sapiens	serous	S3	3	GPL570	GSE63885	ftp://ftp.ncbi.nlm.nih.gov/geo/samples/GSM1559nnn/GSM1559365/	GSM1559365	301559365
ovarian	Homo sapiens	serous	S3	3	GPL570	GSE63885	ftp://ftp.ncbi.nlm.nih.gov/geo/samples/GSM1559nnn/GSM1559364/	GSM1559364	301559364
ovarian	Homo sapiens	serous	S3	3	GPL570	GSE63885	ftp://ftp.ncbi.nlm.nih.gov/geo/samples/GSM1559nnn/GSM1559361/	GSM1559361	301559361
ovarian	Homo sapiens	serous	S3	3	GPL570	GSE63885	ftp://ftp.ncbi.nlm.nih.gov/geo/samples/GSM1559nnn/GSM1559360/	GSM1559360	301559360
ovarian	Homo sapiens	serous	S3	3	GPL570	GSE63885	ftp://ftp.ncbi.nlm.nih.gov/geo/samples/GSM1559nnn/GSM1559359/	GSM1559359	301559359
ovarian	Homo sapiens	serous	S3	3	GPL570	GSE63885	ftp://ftp.ncbi.nlm.nih.gov/geo/samples/GSM1559nnn/GSM1559358/	GSM1559358	301559358
ovarian	Homo sapiens	serous	S3	3	GPL570	GSE63885	ftp://ftp.ncbi.nlm.nih.gov/geo/samples/GSM1559nnn/GSM1559353/	GSM1559353	301559353
ovarian	Homo sapiens	serous	S3	3	GPL570	GSE63885	ftp://ftp.ncbi.nlm.nih.gov/geo/samples/GSM1559nnn/GSM1559350/	GSM1559350	301559350
ovarian	Homo sapiens	serous	S3	3	GPL570	GSE63885	ftp://ftp.ncbi.nlm.nih.gov/geo/samples/GSM1559nnn/GSM1559349/	GSM1559349	301559349
ovarian	Homo sapiens	serous	S3	3	GPL570	GSE63885	ftp://ftp.ncbi.nlm.nih.gov/geo/samples/GSM1559nnn/GSM1559347/	GSM1559347	301559347
ovarian	Homo sapiens	serous	S3	3	GPL570	GSE63885	ftp://ftp.ncbi.nlm.nih.gov/geo/samples/GSM1559nnn/GSM1559345/	GSM1559345	301559345
ovarian	Homo sapiens	serous	S3	3	GPL570	GSE63885	ftp://ftp.ncbi.nlm.nih.gov/geo/samples/GSM1559nnn/GSM1559344/	GSM1559344	301559344
ovarian	Homo sapiens	serous	S3	3	GPL570	GSE63885	ftp://ftp.ncbi.nlm.nih.gov/geo/samples/GSM1559nnn/GSM1559343/	GSM1559343	301559343
ovarian	Homo sapiens	serous	S3	3	GPL570	GSE63885	ftp://ftp.ncbi.nlm.nih.gov/geo/samples/GSM1559nnn/GSM1559342/	GSM1559342	301559342
ovarian	Homo sapiens	serous	S3	3	GPL570	GSE63885	ftp://ftp.ncbi.nlm.nih.gov/geo/samples/GSM1559nnn/GSM1559339/	GSM1559339	301559339
ovarian	Homo sapiens	serous	S3	3	GPL570	GSE63885	ftp://ftp.ncbi.nlm.nih.gov/geo/samples/GSM1559nnn/GSM1559336/	GSM1559336	301559336
ovarian	Homo sapiens	serous	S3	3	GPL570	GSE63885	ftp://ftp.ncbi.nlm.nih.gov/geo/samples/GSM1559nnn/GSM1559335/	GSM1559335	301559335
ovarian	Homo sapiens	serous	S3	3	GPL570	GSE63885	ftp://ftp.ncbi.nlm.nih.gov/geo/samples/GSM1559nnn/GSM1559333/	GSM1559333	301559333
ovarian	Homo sapiens	serous	S3	3	GPL570	GSE63885	ftp://ftp.ncbi.nlm.nih.gov/geo/samples/GSM1559nnn/GSM1559332/	GSM1559332	301559332
ovarian	Homo sapiens	serous	S3	3	GPL570	GSE63885	ftp://ftp.ncbi.nlm.nih.gov/geo/samples/GSM1559nnn/GSM1559329/	GSM1559329	301559329
ovarian	Homo sapiens	serous	S3	3	GPL570	GSE63885	ftp://ftp.ncbi.nlm.nih.gov/geo/samples/GSM1559nnn/GSM1559328/	GSM1559328	301559328
ovarian	Homo sapiens	serous	S3	3	GPL570	GSE63885	ftp://ftp.ncbi.nlm.nih.gov/geo/samples/GSM1559nnn/GSM1559327/	GSM1559327	301559327
ovarian	Homo sapiens	serous	S3	3	GPL570	GSE63885	ftp://ftp.ncbi.nlm.nih.gov/geo/samples/GSM1559nnn/GSM1559326/	GSM1559326	301559326
ovarian	Homo sapiens	serous	S3	3	GPL570	GSE63885	ftp://ftp.ncbi.nlm.nih.gov/geo/samples/GSM1559nnn/GSM1559325/	GSM1559325	301559325
ovarian	Homo sapiens	serous	S3	3	GPL570	GSE63885	ftp://ftp.ncbi.nlm.nih.gov/geo/samples/GSM1559nnn/GSM1559324/	GSM1559324	301559324
ovarian	Homo sapiens	serous	S3	3	GPL570	GSE63885	ftp://ftp.ncbi.nlm.nih.gov/geo/samples/GSM1559nnn/GSM1559323/	GSM1559323	301559323
ovarian	Homo sapiens	serous	S3	3	GPL570	GSE63885	ftp://ftp.ncbi.nlm.nih.gov/geo/samples/GSM1559nnn/GSM1559322/	GSM1559322	301559322
ovarian	Homo sapiens	serous	S3	3	GPL570	GSE63885	ftp://ftp.ncbi.nlm.nih.gov/geo/samples/GSM1559nnn/GSM1559318/	GSM1559318	301559318
ovarian	Homo sapiens	serous	S3	3	GPL570	GSE63885	ftp://ftp.ncbi.nlm.nih.gov/geo/samples/GSM1559nnn/GSM1559316/	GSM1559316	301559316
ovarian	Homo sapiens	serous	S3	3	GPL570	GSE63885	ftp://ftp.ncbi.nlm.nih.gov/geo/samples/GSM1559nnn/GSM1559315/	GSM1559315	301559315
ovarian	Homo sapiens	serous	S3	3	GPL570	GSE63885	ftp://ftp.ncbi.nlm.nih.gov/geo/samples/GSM1559nnn/GSM1559314/	GSM1559314	301559314
ovarian	Homo sapiens	serous	S3	3	GPL570	GSE63885	ftp://ftp.ncbi.nlm.nih.gov/geo/samples/GSM1559nnn/GSM1559313/	GSM1559313	301559313
ovarian	Homo sapiens	serous	S3	3	GPL570	GSE63885	ftp://ftp.ncbi.nlm.nih.gov/geo/samples/GSM1559nnn/GSM1559312/	GSM1559312	301559312
ovarian	Homo sapiens	serous	S3	3	GPL570	GSE63885	ftp://ftp.ncbi.nlm.nih.gov/geo/samples/GSM1559nnn/GSM1559311/	GSM1559311	301559311
ovarian	Homo sapiens	serous	S3	3	GPL570	GSE63885	ftp://ftp.ncbi.nlm.nih.gov/geo/samples/GSM1559nnn/GSM1559309/	GSM1559309	301559309
ovarian	Homo sapiens	serous	S3	3	GPL570	GSE63885	ftp://ftp.ncbi.nlm.nih.gov/geo/samples/GSM1559nnn/GSM1559308/	GSM1559308	301559308
ovarian	Homo sapiens	serous	S3	3	GPL570	GSE63885	ftp://ftp.ncbi.nlm.nih.gov/geo/samples/GSM1559nnn/GSM1559305/	GSM1559305	301559305
ovarian	Homo sapiens	serous	S3	3	GPL570	GSE63885	ftp://ftp.ncbi.nlm.nih.gov/geo/samples/GSM1559nnn/GSM1559304/	GSM1559304	301559304
ovarian	Homo sapiens	serous	S3	3	GPL570	GSE63885	ftp://ftp.ncbi.nlm.nih.gov/geo/samples/GSM1559nnn/GSM1559303/	GSM1559303	301559303
ovarian	Homo sapiens	serous	S3	3	GPL570	GSE63885	ftp://ftp.ncbi.nlm.nih.gov/geo/samples/GSM1559nnn/GSM1559302/	GSM1559302	301559302
ovarian	Homo sapiens	serous	S3	3	GPL570	GSE63885	ftp://ftp.ncbi.nlm.nih.gov/geo/samples/GSM1559nnn/GSM1559300/	GSM1559300	301559300
ovarian	Homo sapiens	serous	S3	3	GPL570	GSE63885	ftp://ftp.ncbi.nlm.nih.gov/geo/samples/GSM1559nnn/GSM1559299/	GSM1559299	301559299
ovarian	Homo sapiens	serous	S3	3	GPL570	GSE20565	ftp://ftp.ncbi.nlm.nih.gov/geo/samples/GSM516nnn/GSM516814/	GSM516814	300516814
ovarian	Homo sapiens	serous	S3	3	GPL570	GSE20565	ftp://ftp.ncbi.nlm.nih.gov/geo/samples/GSM516nnn/GSM516803/	GSM516803	300516803
ovarian	Homo sapiens	serous	S3	3	GPL570	GSE20565	ftp://ftp.ncbi.nlm.nih.gov/geo/samples/GSM516nnn/GSM516802/	GSM516802	300516802
ovarian	Homo sapiens	serous	S3	3	GPL570	GSE20565	ftp://ftp.ncbi.nlm.nih.gov/geo/samples/GSM516nnn/GSM516798/	GSM516798	300516798
ovarian	Homo sapiens	serous	S3	3	GPL570	GSE20565	ftp://ftp.ncbi.nlm.nih.gov/geo/samples/GSM516nnn/GSM516797/	GSM516797	300516797
ovarian	Homo sapiens	serous	S3	3	GPL570	GSE20565	ftp://ftp.ncbi.nlm.nih.gov/geo/samples/GSM516nnn/GSM516795/	GSM516795	300516795
ovarian	Homo sapiens	serous	S3	3	GPL570	GSE20565	ftp://ftp.ncbi.nlm.nih.gov/geo/samples/GSM516nnn/GSM516786/	GSM516786	300516786
ovarian	Homo sapiens	serous	S3	3	GPL570	GSE20565	ftp://ftp.ncbi.nlm.nih.gov/geo/samples/GSM516nnn/GSM516784/	GSM516784	300516784
ovarian	Homo sapiens	serous	S3	3	GPL570	GSE20565	ftp://ftp.ncbi.nlm.nih.gov/geo/samples/GSM516nnn/GSM516783/	GSM516783	300516783
ovarian	Homo sapiens	serous	S3	3	GPL570	GSE20565	ftp://ftp.ncbi.nlm.nih.gov/geo/samples/GSM516nnn/GSM516782/	GSM516782	300516782
ovarian	Homo sapiens	serous	S3	3	GPL570	GSE20565	ftp://ftp.ncbi.nlm.nih.gov/geo/samples/GSM516nnn/GSM516777/	GSM516777	300516777
ovarian	Homo sapiens	serous	S3	3	GPL570	GSE20565	ftp://ftp.ncbi.nlm.nih.gov/geo/samples/GSM516nnn/GSM516776/	GSM516776	300516776
ovarian	Homo sapiens	serous	S3	3	GPL570	GSE20565	ftp://ftp.ncbi.nlm.nih.gov/geo/samples/GSM516nnn/GSM516772/	GSM516772	300516772
ovarian	Homo sapiens	serous	S3	3	GPL570	GSE20565	ftp://ftp.ncbi.nlm.nih.gov/geo/samples/GSM516nnn/GSM516765/	GSM516765	300516765
ovarian	Homo sapiens	serous	S3	3	GPL570	GSE20565	ftp://ftp.ncbi.nlm.nih.gov/geo/samples/GSM516nnn/GSM516763/	GSM516763	300516763
ovarian	Homo sapiens	serous	S3	3	GPL570	GSE20565	ftp://ftp.ncbi.nlm.nih.gov/geo/samples/GSM516nnn/GSM516762/	GSM516762	300516762
ovarian	Homo sapiens	serous	S3	3	GPL570	GSE20565	ftp://ftp.ncbi.nlm.nih.gov/geo/samples/GSM516nnn/GSM516761/	GSM516761	300516761
ovarian	Homo sapiens	serous	S3	3	GPL570	GSE20565	ftp://ftp.ncbi.nlm.nih.gov/geo/samples/GSM516nnn/GSM516760/	GSM516760	300516760
ovarian	Homo sapiens	serous	S3	3	GPL570	GSE20565	ftp://ftp.ncbi.nlm.nih.gov/geo/samples/GSM516nnn/GSM516758/	GSM516758	300516758
ovarian	Homo sapiens	serous	S3	3	GPL570	GSE20565	ftp://ftp.ncbi.nlm.nih.gov/geo/samples/GSM516nnn/GSM516749/	GSM516749	300516749
ovarian	Homo sapiens	serous	S3	3	GPL570	GSE20565	ftp://ftp.ncbi.nlm.nih.gov/geo/samples/GSM516nnn/GSM516745/	GSM516745	300516745
ovarian	Homo sapiens	serous	S3	3	GPL570	GSE20565	ftp://ftp.ncbi.nlm.nih.gov/geo/samples/GSM516nnn/GSM516742/	GSM516742	300516742
ovarian	Homo sapiens	serous	S3	3	GPL570	GSE20565	ftp://ftp.ncbi.nlm.nih.gov/geo/samples/GSM516nnn/GSM516739/	GSM516739	300516739
ovarian	Homo sapiens	serous	S3	3	GPL570	GSE20565	ftp://ftp.ncbi.nlm.nih.gov/geo/samples/GSM516nnn/GSM516734/	GSM516734	300516734
ovarian	Homo sapiens	serous	S3	3	GPL570	GSE20565	ftp://ftp.ncbi.nlm.nih.gov/geo/samples/GSM516nnn/GSM516730/	GSM516730	300516730
ovarian	Homo sapiens	serous	S3	3	GPL570	GSE20565	ftp://ftp.ncbi.nlm.nih.gov/geo/samples/GSM516nnn/GSM516727/	GSM516727	300516727
ovarian	Homo sapiens	serous	S3	3	GPL570	GSE20565	ftp://ftp.ncbi.nlm.nih.gov/geo/samples/GSM516nnn/GSM516725/	GSM516725	300516725
ovarian	Homo sapiens	serous	S3	3	GPL570	GSE20565	ftp://ftp.ncbi.nlm.nih.gov/geo/samples/GSM516nnn/GSM516724/	GSM516724	300516724
ovarian	Homo sapiens	serous	S3	3	GPL570	GSE20565	ftp://ftp.ncbi.nlm.nih.gov/geo/samples/GSM516nnn/GSM516723/	GSM516723	300516723
ovarian	Homo sapiens	serous	S3	3	GPL570	GSE20565	ftp://ftp.ncbi.nlm.nih.gov/geo/samples/GSM516nnn/GSM516715/	GSM516715	300516715
ovarian	Homo sapiens	serous	S3	3	GPL570	GSE20565	ftp://ftp.ncbi.nlm.nih.gov/geo/samples/GSM516nnn/GSM516710/	GSM516710	300516710
ovarian	Homo sapiens	serous	S3	3	GPL570	GSE20565	ftp://ftp.ncbi.nlm.nih.gov/geo/samples/GSM516nnn/GSM516709/	GSM516709	300516709
ovarian	Homo sapiens	serous	S3	3	GPL570	GSE20565	ftp://ftp.ncbi.nlm.nih.gov/geo/samples/GSM516nnn/GSM516708/	GSM516708	300516708
ovarian	Homo sapiens	serous	S3	3	GPL570	GSE20565	ftp://ftp.ncbi.nlm.nih.gov/geo/samples/GSM516nnn/GSM516707/	GSM516707	300516707
ovarian	Homo sapiens	serous	S3	3	GPL570	GSE20565	ftp://ftp.ncbi.nlm.nih.gov/geo/samples/GSM516nnn/GSM516704/	GSM516704	300516704
ovarian	Homo sapiens	serous	S3	3	GPL570	GSE20565	ftp://ftp.ncbi.nlm.nih.gov/geo/samples/GSM516nnn/GSM516690/	GSM516690	300516690
ovarian	Homo sapiens	serous	S3	3	GPL570	GSE20565	ftp://ftp.ncbi.nlm.nih.gov/geo/samples/GSM516nnn/GSM516685/	GSM516685	300516685
ovarian	Homo sapiens	serous	S3	3	GPL570	GSE20565	ftp://ftp.ncbi.nlm.nih.gov/geo/samples/GSM516nnn/GSM516684/	GSM516684	300516684
ovarian	Homo sapiens	serous	S3	3	GPL570	GSE20565	ftp://ftp.ncbi.nlm.nih.gov/geo/samples/GSM516nnn/GSM516683/	GSM516683	300516683
ovarian	Homo sapiens	serous	S3	3	GPL570	GSE20565	ftp://ftp.ncbi.nlm.nih.gov/geo/samples/GSM516nnn/GSM516680/	GSM516680	300516680
ovarian	Homo sapiens	serous	S3	3	GPL570	GSE12172	ftp://ftp.ncbi.nlm.nih.gov/geo/samples/GSM306nnn/GSM306247/	GSM306247	300306247
ovarian	Homo sapiens	serous	S3	3	GPL570	GSE12172	ftp://ftp.ncbi.nlm.nih.gov/geo/samples/GSM306nnn/GSM306245/	GSM306245	300306245
ovarian	Homo sapiens	serous	S3	3	GPL570	GSE12172	ftp://ftp.ncbi.nlm.nih.gov/geo/samples/GSM306nnn/GSM306243/	GSM306243	300306243
ovarian	Homo sapiens	serous	S3	3	GPL570	GSE12172	ftp://ftp.ncbi.nlm.nih.gov/geo/samples/GSM306nnn/GSM306238/	GSM306238	300306238
ovarian	Homo sapiens	serous	S3	3	GPL570	GSE12172	ftp://ftp.ncbi.nlm.nih.gov/geo/samples/GSM306nnn/GSM306237/	GSM306237	300306237
ovarian	Homo sapiens	serous	S3	3	GPL570	GSE12172	ftp://ftp.ncbi.nlm.nih.gov/geo/samples/GSM306nnn/GSM306236/	GSM306236	300306236
ovarian	Homo sapiens	serous	S3	3	GPL570	GSE12172	ftp://ftp.ncbi.nlm.nih.gov/geo/samples/GSM306nnn/GSM306235/	GSM306235	300306235
ovarian	Homo sapiens	serous	S3	3	GPL570	GSE12172	ftp://ftp.ncbi.nlm.nih.gov/geo/samples/GSM306nnn/GSM306234/	GSM306234	300306234
ovarian	Homo sapiens	serous	S3	3	GPL570	GSE12172	ftp://ftp.ncbi.nlm.nih.gov/geo/samples/GSM306nnn/GSM306228/	GSM306228	300306228
ovarian	Homo sapiens	serous	S3	3	GPL570	GSE12172	ftp://ftp.ncbi.nlm.nih.gov/geo/samples/GSM306nnn/GSM306227/	GSM306227	300306227
ovarian	Homo sapiens	serous	S3	3	GPL570	GSE12172	ftp://ftp.ncbi.nlm.nih.gov/geo/samples/GSM306nnn/GSM306226/	GSM306226	300306226
ovarian	Homo sapiens	serous	S3	3	GPL570	GSE12172	ftp://ftp.ncbi.nlm.nih.gov/geo/samples/GSM306nnn/GSM306225/	GSM306225	300306225
ovarian	Homo sapiens	serous	S3	3	GPL570	GSE12172	ftp://ftp.ncbi.nlm.nih.gov/geo/samples/GSM306nnn/GSM306222/	GSM306222	300306222
ovarian	Homo sapiens	serous	S3	3	GPL570	GSE12172	ftp://ftp.ncbi.nlm.nih.gov/geo/samples/GSM306nnn/GSM306220/	GSM306220	300306220
ovarian	Homo sapiens	serous	S3	3	GPL570	GSE12172	ftp://ftp.ncbi.nlm.nih.gov/geo/samples/GSM306nnn/GSM306216/	GSM306216	300306216
ovarian	Homo sapiens	serous	S3	3	GPL570	GSE12172	ftp://ftp.ncbi.nlm.nih.gov/geo/samples/GSM306nnn/GSM306213/	GSM306213	300306213
ovarian	Homo sapiens	serous	S3	3	GPL570	GSE12172	ftp://ftp.ncbi.nlm.nih.gov/geo/samples/GSM306nnn/GSM306206/	GSM306206	300306206
ovarian	Homo sapiens	serous	S3	3	GPL570	GSE12172	ftp://ftp.ncbi.nlm.nih.gov/geo/samples/GSM306nnn/GSM306205/	GSM306205	300306205
ovarian	Homo sapiens	serous	S3	3	GPL570	GSE12172	ftp://ftp.ncbi.nlm.nih.gov/geo/samples/GSM306nnn/GSM306202/	GSM306202	300306202
ovarian	Homo sapiens	serous	S3	3	GPL570	GSE12172	ftp://ftp.ncbi.nlm.nih.gov/geo/samples/GSM306nnn/GSM306201/	GSM306201	300306201
ovarian	Homo sapiens	serous	S3	3	GPL570	GSE12172	ftp://ftp.ncbi.nlm.nih.gov/geo/samples/GSM306nnn/GSM306200/	GSM306200	300306200
ovarian	Homo sapiens	serous	S3	3	GPL570	GSE12172	ftp://ftp.ncbi.nlm.nih.gov/geo/samples/GSM306nnn/GSM306199/	GSM306199	300306199
ovarian	Homo sapiens	serous	S3	3	GPL570	GSE12172	ftp://ftp.ncbi.nlm.nih.gov/geo/samples/GSM306nnn/GSM306198/	GSM306198	300306198
ovarian	Homo sapiens	serous	S3	3	GPL570	GSE12172	ftp://ftp.ncbi.nlm.nih.gov/geo/samples/GSM306nnn/GSM306196/	GSM306196	300306196
ovarian	Homo sapiens	serous	S3	3	GPL570	GSE12172	ftp://ftp.ncbi.nlm.nih.gov/geo/samples/GSM306nnn/GSM306192/	GSM306192	300306192
ovarian	Homo sapiens	serous	S3	3	GPL570	GSE12172	ftp://ftp.ncbi.nlm.nih.gov/geo/samples/GSM306nnn/GSM306189/	GSM306189	300306189
ovarian	Homo sapiens	serous	S3	3	GPL570	GSE12172	ftp://ftp.ncbi.nlm.nih.gov/geo/samples/GSM306nnn/GSM306187/	GSM306187	300306187
ovarian	Homo sapiens	serous	S3	3	GPL570	GSE12172	ftp://ftp.ncbi.nlm.nih.gov/geo/samples/GSM306nnn/GSM306185/	GSM306185	300306185
ovarian	Homo sapiens	serous	S3	3	GPL570	GSE12172	ftp://ftp.ncbi.nlm.nih.gov/geo/samples/GSM306nnn/GSM306184/	GSM306184	300306184
ovarian	Homo sapiens	serous	S3	3	GPL570	GSE12172	ftp://ftp.ncbi.nlm.nih.gov/geo/samples/GSM306nnn/GSM306183/	GSM306183	300306183
ovarian	Homo sapiens	serous	S3	3	GPL570	GSE12172	ftp://ftp.ncbi.nlm.nih.gov/geo/samples/GSM306nnn/GSM306182/	GSM306182	300306182
ovarian	Homo sapiens	serous	S3	3	GPL570	GSE12172	ftp://ftp.ncbi.nlm.nih.gov/geo/samples/GSM306nnn/GSM306181/	GSM306181	300306181
ovarian	Homo sapiens	serous	S3	3	GPL570	GSE12172	ftp://ftp.ncbi.nlm.nih.gov/geo/samples/GSM306nnn/GSM306180/	GSM306180	300306180
ovarian	Homo sapiens	serous	S3	3	GPL570	GSE12172	ftp://ftp.ncbi.nlm.nih.gov/geo/samples/GSM306nnn/GSM306178/	GSM306178	300306178
ovarian	Homo sapiens	serous	S3	3	GPL570	GSE12172	ftp://ftp.ncbi.nlm.nih.gov/geo/samples/GSM306nnn/GSM306175/	GSM306175	300306175
ovarian	Homo sapiens	serous	S3	3	GPL570	GSE12172	ftp://ftp.ncbi.nlm.nih.gov/geo/samples/GSM306nnn/GSM306174/	GSM306174	300306174
ovarian	Homo sapiens	serous	S3	3	GPL570	GSE12172	ftp://ftp.ncbi.nlm.nih.gov/geo/samples/GSM306nnn/GSM306171/	GSM306171	300306171
ovarian	Homo sapiens	serous	S3	3	GPL570	GSE12172	ftp://ftp.ncbi.nlm.nih.gov/geo/samples/GSM306nnn/GSM306167/	GSM306167	300306167
ovarian	Homo sapiens	serous	S3	3	GPL570	GSE12172	ftp://ftp.ncbi.nlm.nih.gov/geo/samples/GSM306nnn/GSM306166/	GSM306166	300306166
ovarian	Homo sapiens	serous	S3	3	GPL570	GSE12172	ftp://ftp.ncbi.nlm.nih.gov/geo/samples/GSM306nnn/GSM306162/	GSM306162	300306162
ovarian	Homo sapiens	serous	S3	3	GPL570	GSE55512	ftp://ftp.ncbi.nlm.nih.gov/geo/samples/GSM1338nnn/GSM1338415/	GSM1338415	301338415
ovarian	Homo sapiens	serous	S3	3	GPL570	GSE55512	ftp://ftp.ncbi.nlm.nih.gov/geo/samples/GSM1338nnn/GSM1338414/	GSM1338414	301338414
ovarian	Homo sapiens	serous	S3	3	GPL570	GSE55512	ftp://ftp.ncbi.nlm.nih.gov/geo/samples/GSM1338nnn/GSM1338411/	GSM1338411	301338411
ovarian	Homo sapiens	serous	S3	3	GPL570	GSE55512	ftp://ftp.ncbi.nlm.nih.gov/geo/samples/GSM1338nnn/GSM1338408/	GSM1338408	301338408
ovarian	Homo sapiens	serous	S3	3	GPL570	GSE55512	ftp://ftp.ncbi.nlm.nih.gov/geo/samples/GSM1338nnn/GSM1338404/	GSM1338404	301338404
ovarian	Homo sapiens	serous	S3	3	GPL570	GSE51373	ftp://ftp.ncbi.nlm.nih.gov/geo/samples/GSM1243nnn/GSM1243903/	GSM1243903	301243903
ovarian	Homo sapiens	serous	S3	3	GPL570	GSE51373	ftp://ftp.ncbi.nlm.nih.gov/geo/samples/GSM1243nnn/GSM1243902/	GSM1243902	301243902
ovarian	Homo sapiens	serous	S3	3	GPL570	GSE51373	ftp://ftp.ncbi.nlm.nih.gov/geo/samples/GSM1243nnn/GSM1243901/	GSM1243901	301243901
ovarian	Homo sapiens	serous	S3	3	GPL570	GSE51373	ftp://ftp.ncbi.nlm.nih.gov/geo/samples/GSM1243nnn/GSM1243897/	GSM1243897	301243897
ovarian	Homo sapiens	serous	S3	3	GPL570	GSE51373	ftp://ftp.ncbi.nlm.nih.gov/geo/samples/GSM1243nnn/GSM1243894/	GSM1243894	301243894
ovarian	Homo sapiens	serous	S3	3	GPL570	GSE51373	ftp://ftp.ncbi.nlm.nih.gov/geo/samples/GSM1243nnn/GSM1243892/	GSM1243892	301243892
ovarian	Homo sapiens	serous	S3	3	GPL570	GSE51373	ftp://ftp.ncbi.nlm.nih.gov/geo/samples/GSM1243nnn/GSM1243891/	GSM1243891	301243891
ovarian	Homo sapiens	serous	S3	3	GPL570	GSE51373	ftp://ftp.ncbi.nlm.nih.gov/geo/samples/GSM1243nnn/GSM1243888/	GSM1243888	301243888
ovarian	Homo sapiens	serous	S3	3	GPL570	GSE26193	ftp://ftp.ncbi.nlm.nih.gov/geo/samples/GSM643nnn/GSM643038/	GSM643038	300643038
ovarian	Homo sapiens	serous	S3	3	GPL570	GSE26193	ftp://ftp.ncbi.nlm.nih.gov/geo/samples/GSM643nnn/GSM643027/	GSM643027	300643027
ovarian	Homo sapiens	serous	S3	3	GPL570	GSE26193	ftp://ftp.ncbi.nlm.nih.gov/geo/samples/GSM643nnn/GSM643026/	GSM643026	300643026
ovarian	Homo sapiens	serous	S3	3	GPL570	GSE26193	ftp://ftp.ncbi.nlm.nih.gov/geo/samples/GSM643nnn/GSM643024/	GSM643024	300643024
ovarian	Homo sapiens	serous	S3	3	GPL570	GSE26193	ftp://ftp.ncbi.nlm.nih.gov/geo/samples/GSM643nnn/GSM643019/	GSM643019	300643019
ovarian	Homo sapiens	serous	S3	3	GPL570	GSE26193	ftp://ftp.ncbi.nlm.nih.gov/geo/samples/GSM643nnn/GSM643017/	GSM643017	300643017
ovarian	Homo sapiens	serous	S3	3	GPL570	GSE26193	ftp://ftp.ncbi.nlm.nih.gov/geo/samples/GSM643nnn/GSM643016/	GSM643016	300643016
ovarian	Homo sapiens	serous	S3	3	GPL570	GSE26193	ftp://ftp.ncbi.nlm.nih.gov/geo/samples/GSM643nnn/GSM643015/	GSM643015	300643015
ovarian	Homo sapiens	serous	S3	3	GPL570	GSE26193	ftp://ftp.ncbi.nlm.nih.gov/geo/samples/GSM643nnn/GSM643014/	GSM643014	300643014
ovarian	Homo sapiens	serous	S3	3	GPL570	GSE26193	ftp://ftp.ncbi.nlm.nih.gov/geo/samples/GSM643nnn/GSM643012/	GSM643012	300643012
ovarian	Homo sapiens	serous	S3	3	GPL570	GSE26193	ftp://ftp.ncbi.nlm.nih.gov/geo/samples/GSM643nnn/GSM643010/	GSM643010	300643010
ovarian	Homo sapiens	serous	S3	3	GPL570	GSE26193	ftp://ftp.ncbi.nlm.nih.gov/geo/samples/GSM643nnn/GSM643009/	GSM643009	300643009
ovarian	Homo sapiens	serous	S3	3	GPL570	GSE26193	ftp://ftp.ncbi.nlm.nih.gov/geo/samples/GSM643nnn/GSM643008/	GSM643008	300643008
ovarian	Homo sapiens	serous	S3	3	GPL570	GSE26193	ftp://ftp.ncbi.nlm.nih.gov/geo/samples/GSM643nnn/GSM643002/	GSM643002	300643002
ovarian	Homo sapiens	serous	S3	3	GPL570	GSE26193	ftp://ftp.ncbi.nlm.nih.gov/geo/samples/GSM643nnn/GSM643000/	GSM643000	300643000
ovarian	Homo sapiens	serous	S3	3	GPL570	GSE26193	ftp://ftp.ncbi.nlm.nih.gov/geo/samples/GSM642nnn/GSM642999/	GSM642999	300642999
ovarian	Homo sapiens	serous	S3	3	GPL570	GSE26193	ftp://ftp.ncbi.nlm.nih.gov/geo/samples/GSM642nnn/GSM642998/	GSM642998	300642998
ovarian	Homo sapiens	serous	S3	3	GPL570	GSE26193	ftp://ftp.ncbi.nlm.nih.gov/geo/samples/GSM642nnn/GSM642997/	GSM642997	300642997
ovarian	Homo sapiens	serous	S3	3	GPL570	GSE26193	ftp://ftp.ncbi.nlm.nih.gov/geo/samples/GSM642nnn/GSM642996/	GSM642996	300642996
ovarian	Homo sapiens	serous	S3	3	GPL570	GSE26193	ftp://ftp.ncbi.nlm.nih.gov/geo/samples/GSM642nnn/GSM642991/	GSM642991	300642991
ovarian	Homo sapiens	serous	S3	3	GPL570	GSE26193	ftp://ftp.ncbi.nlm.nih.gov/geo/samples/GSM642nnn/GSM642989/	GSM642989	300642989
ovarian	Homo sapiens	serous	S3	3	GPL570	GSE26193	ftp://ftp.ncbi.nlm.nih.gov/geo/samples/GSM642nnn/GSM642985/	GSM642985	300642985
ovarian	Homo sapiens	serous	S3	3	GPL570	GSE26193	ftp://ftp.ncbi.nlm.nih.gov/geo/samples/GSM642nnn/GSM642983/	GSM642983	300642983
ovarian	Homo sapiens	serous	S3	3	GPL570	GSE26193	ftp://ftp.ncbi.nlm.nih.gov/geo/samples/GSM642nnn/GSM642981/	GSM642981	300642981
ovarian	Homo sapiens	serous	S3	3	GPL570	GSE26193	ftp://ftp.ncbi.nlm.nih.gov/geo/samples/GSM642nnn/GSM642978/	GSM642978	300642978
ovarian	Homo sapiens	serous	S3	3	GPL570	GSE26193	ftp://ftp.ncbi.nlm.nih.gov/geo/samples/GSM642nnn/GSM642976/	GSM642976	300642976
ovarian	Homo sapiens	serous	S3	3	GPL570	GSE26193	ftp://ftp.ncbi.nlm.nih.gov/geo/samples/GSM642nnn/GSM642973/	GSM642973	300642973
ovarian	Homo sapiens	serous	S3	3	GPL570	GSE26193	ftp://ftp.ncbi.nlm.nih.gov/geo/samples/GSM642nnn/GSM642972/	GSM642972	300642972
ovarian	Homo sapiens	serous	S3	3	GPL570	GSE26193	ftp://ftp.ncbi.nlm.nih.gov/geo/samples/GSM642nnn/GSM642968/	GSM642968	300642968
ovarian	Homo sapiens	serous	S3	3	GPL570	GSE26193	ftp://ftp.ncbi.nlm.nih.gov/geo/samples/GSM642nnn/GSM642966/	GSM642966	300642966
ovarian	Homo sapiens	serous	S3	3	GPL570	GSE26193	ftp://ftp.ncbi.nlm.nih.gov/geo/samples/GSM642nnn/GSM642964/	GSM642964	300642964
ovarian	Homo sapiens	serous	S3	3	GPL570	GSE26193	ftp://ftp.ncbi.nlm.nih.gov/geo/samples/GSM642nnn/GSM642961/	GSM642961	300642961
ovarian	Homo sapiens	serous	S3	3	GPL570	GSE26193	ftp://ftp.ncbi.nlm.nih.gov/geo/samples/GSM642nnn/GSM642960/	GSM642960	300642960
ovarian	Homo sapiens	serous	S3	3	GPL570	GSE26193	ftp://ftp.ncbi.nlm.nih.gov/geo/samples/GSM642nnn/GSM642959/	GSM642959	300642959
ovarian	Homo sapiens	serous	S3	3	GPL570	GSE26193	ftp://ftp.ncbi.nlm.nih.gov/geo/samples/GSM642nnn/GSM642958/	GSM642958	300642958
ovarian	Homo sapiens	serous	S3	3	GPL570	GSE26193	ftp://ftp.ncbi.nlm.nih.gov/geo/samples/GSM642nnn/GSM642956/	GSM642956	300642956
ovarian	Homo sapiens	serous	S3	3	GPL570	GSE26193	ftp://ftp.ncbi.nlm.nih.gov/geo/samples/GSM642nnn/GSM642955/	GSM642955	300642955
ovarian	Homo sapiens	serous	S3	3	GPL570	GSE26193	ftp://ftp.ncbi.nlm.nih.gov/geo/samples/GSM642nnn/GSM642953/	GSM642953	300642953
ovarian	Homo sapiens	serous	S3	3	GPL570	GSE26193	ftp://ftp.ncbi.nlm.nih.gov/geo/samples/GSM642nnn/GSM642943/	GSM642943	300642943
ovarian	Homo sapiens	serous	S3	3	GPL570	GSE26193	ftp://ftp.ncbi.nlm.nih.gov/geo/samples/GSM642nnn/GSM642939/	GSM642939	300642939
ovarian	Homo sapiens	serous	S3	3	GPL570	GSE26193	ftp://ftp.ncbi.nlm.nih.gov/geo/samples/GSM642nnn/GSM642938/	GSM642938	300642938
ovarian	Homo sapiens	serous	S3	3	GPL570	GSE26193	ftp://ftp.ncbi.nlm.nih.gov/geo/samples/GSM642nnn/GSM642937/	GSM642937	300642937
ovarian	Homo sapiens	serous	S3	3	GPL570	GSE26193	ftp://ftp.ncbi.nlm.nih.gov/geo/samples/GSM642nnn/GSM642935/	GSM642935	300642935
ovarian	Homo sapiens	serous	S3	3	GPL570	GSE30161	ftp://ftp.ncbi.nlm.nih.gov/geo/samples/GSM746nnn/GSM746918/	GSM746918	300746918
ovarian	Homo sapiens	serous	S3	3	GPL570	GSE30161	ftp://ftp.ncbi.nlm.nih.gov/geo/samples/GSM746nnn/GSM746916/	GSM746916	300746916
ovarian	Homo sapiens	serous	S3	3	GPL570	GSE30161	ftp://ftp.ncbi.nlm.nih.gov/geo/samples/GSM746nnn/GSM746915/	GSM746915	300746915
ovarian	Homo sapiens	serous	S3	3	GPL570	GSE30161	ftp://ftp.ncbi.nlm.nih.gov/geo/samples/GSM746nnn/GSM746914/	GSM746914	300746914
ovarian	Homo sapiens	serous	S3	3	GPL570	GSE30161	ftp://ftp.ncbi.nlm.nih.gov/geo/samples/GSM746nnn/GSM746912/	GSM746912	300746912
ovarian	Homo sapiens	serous	S3	3	GPL570	GSE30161	ftp://ftp.ncbi.nlm.nih.gov/geo/samples/GSM746nnn/GSM746911/	GSM746911	300746911
ovarian	Homo sapiens	serous	S3	3	GPL570	GSE30161	ftp://ftp.ncbi.nlm.nih.gov/geo/samples/GSM746nnn/GSM746906/	GSM746906	300746906
ovarian	Homo sapiens	serous	S3	3	GPL570	GSE30161	ftp://ftp.ncbi.nlm.nih.gov/geo/samples/GSM746nnn/GSM746905/	GSM746905	300746905
ovarian	Homo sapiens	serous	S3	3	GPL570	GSE30161	ftp://ftp.ncbi.nlm.nih.gov/geo/samples/GSM746nnn/GSM746904/	GSM746904	300746904
ovarian	Homo sapiens	serous	S3	3	GPL570	GSE30161	ftp://ftp.ncbi.nlm.nih.gov/geo/samples/GSM746nnn/GSM746902/	GSM746902	300746902
ovarian	Homo sapiens	serous	S3	3	GPL570	GSE30161	ftp://ftp.ncbi.nlm.nih.gov/geo/samples/GSM746nnn/GSM746900/	GSM746900	300746900
ovarian	Homo sapiens	serous	S3	3	GPL570	GSE30161	ftp://ftp.ncbi.nlm.nih.gov/geo/samples/GSM746nnn/GSM746899/	GSM746899	300746899
ovarian	Homo sapiens	serous	S3	3	GPL570	GSE30161	ftp://ftp.ncbi.nlm.nih.gov/geo/samples/GSM746nnn/GSM746898/	GSM746898	300746898
ovarian	Homo sapiens	serous	S3	3	GPL570	GSE30161	ftp://ftp.ncbi.nlm.nih.gov/geo/samples/GSM746nnn/GSM746893/	GSM746893	300746893
ovarian	Homo sapiens	serous	S3	3	GPL570	GSE30161	ftp://ftp.ncbi.nlm.nih.gov/geo/samples/GSM746nnn/GSM746892/	GSM746892	300746892
ovarian	Homo sapiens	serous	S3	3	GPL570	GSE30161	ftp://ftp.ncbi.nlm.nih.gov/geo/samples/GSM746nnn/GSM746889/	GSM746889	300746889
ovarian	Homo sapiens	serous	S3	3	GPL570	GSE30161	ftp://ftp.ncbi.nlm.nih.gov/geo/samples/GSM746nnn/GSM746887/	GSM746887	300746887
ovarian	Homo sapiens	serous	S3	3	GPL570	GSE30161	ftp://ftp.ncbi.nlm.nih.gov/geo/samples/GSM746nnn/GSM746886/	GSM746886	300746886
ovarian	Homo sapiens	serous	S3	3	GPL570	GSE30161	ftp://ftp.ncbi.nlm.nih.gov/geo/samples/GSM746nnn/GSM746885/	GSM746885	300746885
ovarian	Homo sapiens	serous	S3	3	GPL570	GSE30161	ftp://ftp.ncbi.nlm.nih.gov/geo/samples/GSM746nnn/GSM746884/	GSM746884	300746884
ovarian	Homo sapiens	serous	S3	3	GPL570	GSE30161	ftp://ftp.ncbi.nlm.nih.gov/geo/samples/GSM746nnn/GSM746880/	GSM746880	300746880
ovarian	Homo sapiens	serous	S3	3	GPL570	GSE30161	ftp://ftp.ncbi.nlm.nih.gov/geo/samples/GSM746nnn/GSM746878/	GSM746878	300746878
ovarian	Homo sapiens	serous	S3	3	GPL570	GSE30161	ftp://ftp.ncbi.nlm.nih.gov/geo/samples/GSM746nnn/GSM746876/	GSM746876	300746876
ovarian	Homo sapiens	serous	S3	3	GPL570	GSE30161	ftp://ftp.ncbi.nlm.nih.gov/geo/samples/GSM746nnn/GSM746875/	GSM746875	300746875
ovarian	Homo sapiens	serous	S3	3	GPL570	GSE30161	ftp://ftp.ncbi.nlm.nih.gov/geo/samples/GSM746nnn/GSM746873/	GSM746873	300746873
ovarian	Homo sapiens	serous	S3	3	GPL570	GSE30161	ftp://ftp.ncbi.nlm.nih.gov/geo/samples/GSM746nnn/GSM746872/	GSM746872	300746872
ovarian	Homo sapiens	serous	S3	3	GPL570	GSE30161	ftp://ftp.ncbi.nlm.nih.gov/geo/samples/GSM746nnn/GSM746871/	GSM746871	300746871
ovarian	Homo sapiens	serous	S3	3	GPL570	GSE30161	ftp://ftp.ncbi.nlm.nih.gov/geo/samples/GSM746nnn/GSM746869/	GSM746869	300746869
ovarian	Homo sapiens	serous	S3	3	GPL570	GSE30161	ftp://ftp.ncbi.nlm.nih.gov/geo/samples/GSM746nnn/GSM746868/	GSM746868	300746868
ovarian	Homo sapiens	serous	S3	3	GPL570	GSE30161	ftp://ftp.ncbi.nlm.nih.gov/geo/samples/GSM746nnn/GSM746867/	GSM746867	300746867
ovarian	Homo sapiens	serous	S3	3	GPL570	GSE30161	ftp://ftp.ncbi.nlm.nih.gov/geo/samples/GSM746nnn/GSM746864/	GSM746864	300746864
ovarian	Homo sapiens	serous	S3	3	GPL570	GSE30161	ftp://ftp.ncbi.nlm.nih.gov/geo/samples/GSM746nnn/GSM746863/	GSM746863	300746863
ovarian	Homo sapiens	serous	S3	3	GPL570	GSE30161	ftp://ftp.ncbi.nlm.nih.gov/geo/samples/GSM746nnn/GSM746862/	GSM746862	300746862
ovarian	Homo sapiens	serous	S3	3	GPL6480	GSE17260	ftp://ftp.ncbi.nlm.nih.gov/geo/samples/GSM432nnn/GSM432321/	GSM432321	300432321
ovarian	Homo sapiens	serous	S3	3	GPL6480	GSE17260	ftp://ftp.ncbi.nlm.nih.gov/geo/samples/GSM432nnn/GSM432315/	GSM432315	300432315
ovarian	Homo sapiens	serous	S3	3	GPL6480	GSE17260	ftp://ftp.ncbi.nlm.nih.gov/geo/samples/GSM432nnn/GSM432313/	GSM432313	300432313
ovarian	Homo sapiens	serous	S3	3	GPL6480	GSE17260	ftp://ftp.ncbi.nlm.nih.gov/geo/samples/GSM432nnn/GSM432248/	GSM432248	300432248
ovarian	Homo sapiens	serous	S3	3	GPL6480	GSE17260	ftp://ftp.ncbi.nlm.nih.gov/geo/samples/GSM432nnn/GSM432246/	GSM432246	300432246
ovarian	Homo sapiens	serous	S3	3	GPL6480	GSE17260	ftp://ftp.ncbi.nlm.nih.gov/geo/samples/GSM432nnn/GSM432230/	GSM432230	300432230
ovarian	Homo sapiens	serous	S3	3	GPL6480	GSE53963	ftp://ftp.ncbi.nlm.nih.gov/geo/samples/GSM1304nnn/GSM1304382/	GSM1304382	301304382
ovarian	Homo sapiens	serous	S3	3	GPL6480	GSE53963	ftp://ftp.ncbi.nlm.nih.gov/geo/samples/GSM1304nnn/GSM1304375/	GSM1304375	301304375
ovarian	Homo sapiens	serous	S3	3	GPL6480	GSE53963	ftp://ftp.ncbi.nlm.nih.gov/geo/samples/GSM1304nnn/GSM1304309/	GSM1304309	301304309
ovarian	Homo sapiens	serous	S3	3	GPL6480	GSE17260	ftp://ftp.ncbi.nlm.nih.gov/geo/samples/GSM432nnn/GSM432327/	GSM432327	300432327
ovarian	Homo sapiens	serous	S3	3	GPL6480	GSE17260	ftp://ftp.ncbi.nlm.nih.gov/geo/samples/GSM432nnn/GSM432325/	GSM432325	300432325
ovarian	Homo sapiens	serous	S3	3	GPL6480	GSE17260	ftp://ftp.ncbi.nlm.nih.gov/geo/samples/GSM432nnn/GSM432316/	GSM432316	300432316
ovarian	Homo sapiens	serous	S3	3	GPL6480	GSE17260	ftp://ftp.ncbi.nlm.nih.gov/geo/samples/GSM432nnn/GSM432314/	GSM432314	300432314
ovarian	Homo sapiens	serous	S3	3	GPL6480	GSE17260	ftp://ftp.ncbi.nlm.nih.gov/geo/samples/GSM432nnn/GSM432312/	GSM432312	300432312
ovarian	Homo sapiens	serous	S3	3	GPL6480	GSE17260	ftp://ftp.ncbi.nlm.nih.gov/geo/samples/GSM432nnn/GSM432301/	GSM432301	300432301
ovarian	Homo sapiens	serous	S3	3	GPL6480	GSE17260	ftp://ftp.ncbi.nlm.nih.gov/geo/samples/GSM432nnn/GSM432291/	GSM432291	300432291
ovarian	Homo sapiens	serous	S3	3	GPL6480	GSE17260	ftp://ftp.ncbi.nlm.nih.gov/geo/samples/GSM432nnn/GSM432289/	GSM432289	300432289
ovarian	Homo sapiens	serous	S3	3	GPL6480	GSE17260	ftp://ftp.ncbi.nlm.nih.gov/geo/samples/GSM432nnn/GSM432286/	GSM432286	300432286
ovarian	Homo sapiens	serous	S3	3	GPL6480	GSE17260	ftp://ftp.ncbi.nlm.nih.gov/geo/samples/GSM432nnn/GSM432284/	GSM432284	300432284
ovarian	Homo sapiens	serous	S3	3	GPL6480	GSE17260	ftp://ftp.ncbi.nlm.nih.gov/geo/samples/GSM432nnn/GSM432267/	GSM432267	300432267
ovarian	Homo sapiens	serous	S3	3	GPL6480	GSE17260	ftp://ftp.ncbi.nlm.nih.gov/geo/samples/GSM432nnn/GSM432264/	GSM432264	300432264
ovarian	Homo sapiens	serous	S3	3	GPL6480	GSE17260	ftp://ftp.ncbi.nlm.nih.gov/geo/samples/GSM432nnn/GSM432262/	GSM432262	300432262
ovarian	Homo sapiens	serous	S3	3	GPL6480	GSE17260	ftp://ftp.ncbi.nlm.nih.gov/geo/samples/GSM432nnn/GSM432259/	GSM432259	300432259
ovarian	Homo sapiens	serous	S3	3	GPL6480	GSE17260	ftp://ftp.ncbi.nlm.nih.gov/geo/samples/GSM432nnn/GSM432256/	GSM432256	300432256
ovarian	Homo sapiens	serous	S3	3	GPL6480	GSE17260	ftp://ftp.ncbi.nlm.nih.gov/geo/samples/GSM432nnn/GSM432233/	GSM432233	300432233
ovarian	Homo sapiens	serous	S3	3	GPL6480	GSE17260	ftp://ftp.ncbi.nlm.nih.gov/geo/samples/GSM432nnn/GSM432227/	GSM432227	300432227
ovarian	Homo sapiens	serous	S3	3	GPL6480	GSE17260	ftp://ftp.ncbi.nlm.nih.gov/geo/samples/GSM432nnn/GSM432225/	GSM432225	300432225
ovarian	Homo sapiens	serous	S3	3	GPL6480	GSE53963	ftp://ftp.ncbi.nlm.nih.gov/geo/samples/GSM1304nnn/GSM1304366/	GSM1304366	301304366
ovarian	Homo sapiens	serous	S3	3	GPL6480	GSE53963	ftp://ftp.ncbi.nlm.nih.gov/geo/samples/GSM1304nnn/GSM1304299/	GSM1304299	301304299
ovarian	Homo sapiens	serous	S3	3	GPL6480	GSE53963	ftp://ftp.ncbi.nlm.nih.gov/geo/samples/GSM1304nnn/GSM1304294/	GSM1304294	301304294
ovarian	Homo sapiens	serous	S3	3	GPL6480	GSE53963	ftp://ftp.ncbi.nlm.nih.gov/geo/samples/GSM1304nnn/GSM1304292/	GSM1304292	301304292
ovarian	Homo sapiens	serous	S3	3	GPL6480	GSE53963	ftp://ftp.ncbi.nlm.nih.gov/geo/samples/GSM1304nnn/GSM1304288/	GSM1304288	301304288
ovarian	Homo sapiens	serous	S3	3	GPL6480	GSE53963	ftp://ftp.ncbi.nlm.nih.gov/geo/samples/GSM1304nnn/GSM1304274/	GSM1304274	301304274
ovarian	Homo sapiens	serous	S3	3	GPL6480	GSE53963	ftp://ftp.ncbi.nlm.nih.gov/geo/samples/GSM1304nnn/GSM1304267/	GSM1304267	301304267
ovarian	Homo sapiens	serous	S3	3	GPL6480	GSE17260	ftp://ftp.ncbi.nlm.nih.gov/geo/samples/GSM432nnn/GSM432329/	GSM432329	300432329
ovarian	Homo sapiens	serous	S3	3	GPL6480	GSE17260	ftp://ftp.ncbi.nlm.nih.gov/geo/samples/GSM432nnn/GSM432324/	GSM432324	300432324
ovarian	Homo sapiens	serous	S3	3	GPL6480	GSE17260	ftp://ftp.ncbi.nlm.nih.gov/geo/samples/GSM432nnn/GSM432319/	GSM432319	300432319
ovarian	Homo sapiens	serous	S3	3	GPL6480	GSE17260	ftp://ftp.ncbi.nlm.nih.gov/geo/samples/GSM432nnn/GSM432318/	GSM432318	300432318
ovarian	Homo sapiens	serous	S3	3	GPL6480	GSE17260	ftp://ftp.ncbi.nlm.nih.gov/geo/samples/GSM432nnn/GSM432317/	GSM432317	300432317
ovarian	Homo sapiens	serous	S3	3	GPL6480	GSE17260	ftp://ftp.ncbi.nlm.nih.gov/geo/samples/GSM432nnn/GSM432311/	GSM432311	300432311
ovarian	Homo sapiens	serous	S3	3	GPL6480	GSE17260	ftp://ftp.ncbi.nlm.nih.gov/geo/samples/GSM432nnn/GSM432310/	GSM432310	300432310
ovarian	Homo sapiens	serous	S3	3	GPL6480	GSE17260	ftp://ftp.ncbi.nlm.nih.gov/geo/samples/GSM432nnn/GSM432309/	GSM432309	300432309
ovarian	Homo sapiens	serous	S3	3	GPL6480	GSE17260	ftp://ftp.ncbi.nlm.nih.gov/geo/samples/GSM432nnn/GSM432308/	GSM432308	300432308
ovarian	Homo sapiens	serous	S3	3	GPL6480	GSE17260	ftp://ftp.ncbi.nlm.nih.gov/geo/samples/GSM432nnn/GSM432306/	GSM432306	300432306
ovarian	Homo sapiens	serous	S3	3	GPL6480	GSE17260	ftp://ftp.ncbi.nlm.nih.gov/geo/samples/GSM432nnn/GSM432305/	GSM432305	300432305
ovarian	Homo sapiens	serous	S3	3	GPL6480	GSE17260	ftp://ftp.ncbi.nlm.nih.gov/geo/samples/GSM432nnn/GSM432304/	GSM432304	300432304
ovarian	Homo sapiens	serous	S3	3	GPL6480	GSE17260	ftp://ftp.ncbi.nlm.nih.gov/geo/samples/GSM432nnn/GSM432303/	GSM432303	300432303
ovarian	Homo sapiens	serous	S3	3	GPL6480	GSE17260	ftp://ftp.ncbi.nlm.nih.gov/geo/samples/GSM432nnn/GSM432302/	GSM432302	300432302
ovarian	Homo sapiens	serous	S3	3	GPL6480	GSE17260	ftp://ftp.ncbi.nlm.nih.gov/geo/samples/GSM432nnn/GSM432298/	GSM432298	300432298
ovarian	Homo sapiens	serous	S3	3	GPL6480	GSE17260	ftp://ftp.ncbi.nlm.nih.gov/geo/samples/GSM432nnn/GSM432297/	GSM432297	300432297
ovarian	Homo sapiens	serous	S3	3	GPL6480	GSE17260	ftp://ftp.ncbi.nlm.nih.gov/geo/samples/GSM432nnn/GSM432296/	GSM432296	300432296
ovarian	Homo sapiens	serous	S3	3	GPL6480	GSE17260	ftp://ftp.ncbi.nlm.nih.gov/geo/samples/GSM432nnn/GSM432295/	GSM432295	300432295
ovarian	Homo sapiens	serous	S3	3	GPL6480	GSE17260	ftp://ftp.ncbi.nlm.nih.gov/geo/samples/GSM432nnn/GSM432294/	GSM432294	300432294
ovarian	Homo sapiens	serous	S3	3	GPL6480	GSE17260	ftp://ftp.ncbi.nlm.nih.gov/geo/samples/GSM432nnn/GSM432293/	GSM432293	300432293
ovarian	Homo sapiens	serous	S3	3	GPL6480	GSE17260	ftp://ftp.ncbi.nlm.nih.gov/geo/samples/GSM432nnn/GSM432292/	GSM432292	300432292
ovarian	Homo sapiens	serous	S3	3	GPL6480	GSE17260	ftp://ftp.ncbi.nlm.nih.gov/geo/samples/GSM432nnn/GSM432290/	GSM432290	300432290
ovarian	Homo sapiens	serous	S3	3	GPL6480	GSE17260	ftp://ftp.ncbi.nlm.nih.gov/geo/samples/GSM432nnn/GSM432288/	GSM432288	300432288
ovarian	Homo sapiens	serous	S3	3	GPL6480	GSE17260	ftp://ftp.ncbi.nlm.nih.gov/geo/samples/GSM432nnn/GSM432285/	GSM432285	300432285
ovarian	Homo sapiens	serous	S3	3	GPL6480	GSE17260	ftp://ftp.ncbi.nlm.nih.gov/geo/samples/GSM432nnn/GSM432283/	GSM432283	300432283
ovarian	Homo sapiens	serous	S3	3	GPL6480	GSE17260	ftp://ftp.ncbi.nlm.nih.gov/geo/samples/GSM432nnn/GSM432282/	GSM432282	300432282
ovarian	Homo sapiens	serous	S3	3	GPL6480	GSE17260	ftp://ftp.ncbi.nlm.nih.gov/geo/samples/GSM432nnn/GSM432281/	GSM432281	300432281
ovarian	Homo sapiens	serous	S3	3	GPL6480	GSE17260	ftp://ftp.ncbi.nlm.nih.gov/geo/samples/GSM432nnn/GSM432280/	GSM432280	300432280
ovarian	Homo sapiens	serous	S3	3	GPL6480	GSE17260	ftp://ftp.ncbi.nlm.nih.gov/geo/samples/GSM432nnn/GSM432279/	GSM432279	300432279
ovarian	Homo sapiens	serous	S3	3	GPL6480	GSE17260	ftp://ftp.ncbi.nlm.nih.gov/geo/samples/GSM432nnn/GSM432278/	GSM432278	300432278
ovarian	Homo sapiens	serous	S3	3	GPL6480	GSE17260	ftp://ftp.ncbi.nlm.nih.gov/geo/samples/GSM432nnn/GSM432277/	GSM432277	300432277
ovarian	Homo sapiens	serous	S3	3	GPL6480	GSE17260	ftp://ftp.ncbi.nlm.nih.gov/geo/samples/GSM432nnn/GSM432276/	GSM432276	300432276
ovarian	Homo sapiens	serous	S3	3	GPL6480	GSE17260	ftp://ftp.ncbi.nlm.nih.gov/geo/samples/GSM432nnn/GSM432275/	GSM432275	300432275
ovarian	Homo sapiens	serous	S3	3	GPL6480	GSE17260	ftp://ftp.ncbi.nlm.nih.gov/geo/samples/GSM432nnn/GSM432274/	GSM432274	300432274
ovarian	Homo sapiens	serous	S3	3	GPL6480	GSE17260	ftp://ftp.ncbi.nlm.nih.gov/geo/samples/GSM432nnn/GSM432270/	GSM432270	300432270
ovarian	Homo sapiens	serous	S3	3	GPL6480	GSE17260	ftp://ftp.ncbi.nlm.nih.gov/geo/samples/GSM432nnn/GSM432269/	GSM432269	300432269
ovarian	Homo sapiens	serous	S3	3	GPL6480	GSE17260	ftp://ftp.ncbi.nlm.nih.gov/geo/samples/GSM432nnn/GSM432268/	GSM432268	300432268
ovarian	Homo sapiens	serous	S3	3	GPL6480	GSE17260	ftp://ftp.ncbi.nlm.nih.gov/geo/samples/GSM432nnn/GSM432266/	GSM432266	300432266
ovarian	Homo sapiens	serous	S3	3	GPL6480	GSE17260	ftp://ftp.ncbi.nlm.nih.gov/geo/samples/GSM432nnn/GSM432265/	GSM432265	300432265
ovarian	Homo sapiens	serous	S3	3	GPL6480	GSE17260	ftp://ftp.ncbi.nlm.nih.gov/geo/samples/GSM432nnn/GSM432263/	GSM432263	300432263
ovarian	Homo sapiens	serous	S3	3	GPL6480	GSE17260	ftp://ftp.ncbi.nlm.nih.gov/geo/samples/GSM432nnn/GSM432261/	GSM432261	300432261
ovarian	Homo sapiens	serous	S3	3	GPL6480	GSE17260	ftp://ftp.ncbi.nlm.nih.gov/geo/samples/GSM432nnn/GSM432260/	GSM432260	300432260
ovarian	Homo sapiens	serous	S3	3	GPL6480	GSE17260	ftp://ftp.ncbi.nlm.nih.gov/geo/samples/GSM432nnn/GSM432258/	GSM432258	300432258
ovarian	Homo sapiens	serous	S3	3	GPL6480	GSE17260	ftp://ftp.ncbi.nlm.nih.gov/geo/samples/GSM432nnn/GSM432257/	GSM432257	300432257
ovarian	Homo sapiens	serous	S3	3	GPL6480	GSE17260	ftp://ftp.ncbi.nlm.nih.gov/geo/samples/GSM432nnn/GSM432255/	GSM432255	300432255
ovarian	Homo sapiens	serous	S3	3	GPL6480	GSE17260	ftp://ftp.ncbi.nlm.nih.gov/geo/samples/GSM432nnn/GSM432253/	GSM432253	300432253
ovarian	Homo sapiens	serous	S3	3	GPL6480	GSE17260	ftp://ftp.ncbi.nlm.nih.gov/geo/samples/GSM432nnn/GSM432251/	GSM432251	300432251
ovarian	Homo sapiens	serous	S3	3	GPL6480	GSE17260	ftp://ftp.ncbi.nlm.nih.gov/geo/samples/GSM432nnn/GSM432250/	GSM432250	300432250
ovarian	Homo sapiens	serous	S3	3	GPL6480	GSE17260	ftp://ftp.ncbi.nlm.nih.gov/geo/samples/GSM432nnn/GSM432249/	GSM432249	300432249
ovarian	Homo sapiens	serous	S3	3	GPL6480	GSE17260	ftp://ftp.ncbi.nlm.nih.gov/geo/samples/GSM432nnn/GSM432247/	GSM432247	300432247
ovarian	Homo sapiens	serous	S3	3	GPL6480	GSE17260	ftp://ftp.ncbi.nlm.nih.gov/geo/samples/GSM432nnn/GSM432245/	GSM432245	300432245
ovarian	Homo sapiens	serous	S3	3	GPL6480	GSE17260	ftp://ftp.ncbi.nlm.nih.gov/geo/samples/GSM432nnn/GSM432244/	GSM432244	300432244
ovarian	Homo sapiens	serous	S3	3	GPL6480	GSE17260	ftp://ftp.ncbi.nlm.nih.gov/geo/samples/GSM432nnn/GSM432243/	GSM432243	300432243
ovarian	Homo sapiens	serous	S3	3	GPL6480	GSE17260	ftp://ftp.ncbi.nlm.nih.gov/geo/samples/GSM432nnn/GSM432242/	GSM432242	300432242
ovarian	Homo sapiens	serous	S3	3	GPL6480	GSE17260	ftp://ftp.ncbi.nlm.nih.gov/geo/samples/GSM432nnn/GSM432240/	GSM432240	300432240
ovarian	Homo sapiens	serous	S3	3	GPL6480	GSE17260	ftp://ftp.ncbi.nlm.nih.gov/geo/samples/GSM432nnn/GSM432238/	GSM432238	300432238
ovarian	Homo sapiens	serous	S3	3	GPL6480	GSE17260	ftp://ftp.ncbi.nlm.nih.gov/geo/samples/GSM432nnn/GSM432237/	GSM432237	300432237
ovarian	Homo sapiens	serous	S3	3	GPL6480	GSE17260	ftp://ftp.ncbi.nlm.nih.gov/geo/samples/GSM432nnn/GSM432236/	GSM432236	300432236
ovarian	Homo sapiens	serous	S3	3	GPL6480	GSE17260	ftp://ftp.ncbi.nlm.nih.gov/geo/samples/GSM432nnn/GSM432235/	GSM432235	300432235
ovarian	Homo sapiens	serous	S3	3	GPL6480	GSE17260	ftp://ftp.ncbi.nlm.nih.gov/geo/samples/GSM432nnn/GSM432234/	GSM432234	300432234
ovarian	Homo sapiens	serous	S3	3	GPL6480	GSE17260	ftp://ftp.ncbi.nlm.nih.gov/geo/samples/GSM432nnn/GSM432232/	GSM432232	300432232
ovarian	Homo sapiens	serous	S3	3	GPL6480	GSE17260	ftp://ftp.ncbi.nlm.nih.gov/geo/samples/GSM432nnn/GSM432231/	GSM432231	300432231
ovarian	Homo sapiens	serous	S3	3	GPL6480	GSE17260	ftp://ftp.ncbi.nlm.nih.gov/geo/samples/GSM432nnn/GSM432229/	GSM432229	300432229
ovarian	Homo sapiens	serous	S3	3	GPL6480	GSE17260	ftp://ftp.ncbi.nlm.nih.gov/geo/samples/GSM432nnn/GSM432228/	GSM432228	300432228
ovarian	Homo sapiens	serous	S3	3	GPL6480	GSE17260	ftp://ftp.ncbi.nlm.nih.gov/geo/samples/GSM432nnn/GSM432226/	GSM432226	300432226
ovarian	Homo sapiens	serous	S3	3	GPL6480	GSE17260	ftp://ftp.ncbi.nlm.nih.gov/geo/samples/GSM432nnn/GSM432224/	GSM432224	300432224
ovarian	Homo sapiens	serous	S3	3	GPL6480	GSE17260	ftp://ftp.ncbi.nlm.nih.gov/geo/samples/GSM432nnn/GSM432223/	GSM432223	300432223
ovarian	Homo sapiens	serous	S3	3	GPL6480	GSE17260	ftp://ftp.ncbi.nlm.nih.gov/geo/samples/GSM432nnn/GSM432222/	GSM432222	300432222
ovarian	Homo sapiens	serous	S3	3	GPL6480	GSE17260	ftp://ftp.ncbi.nlm.nih.gov/geo/samples/GSM432nnn/GSM432220/	GSM432220	300432220
ovarian	Homo sapiens	serous	S3	3	GPL6480	GSE53963	ftp://ftp.ncbi.nlm.nih.gov/geo/samples/GSM1304nnn/GSM1304417/	GSM1304417	301304417
ovarian	Homo sapiens	serous	S3	3	GPL6480	GSE53963	ftp://ftp.ncbi.nlm.nih.gov/geo/samples/GSM1304nnn/GSM1304416/	GSM1304416	301304416
ovarian	Homo sapiens	serous	S3	3	GPL6480	GSE53963	ftp://ftp.ncbi.nlm.nih.gov/geo/samples/GSM1304nnn/GSM1304415/	GSM1304415	301304415
ovarian	Homo sapiens	serous	S3	3	GPL6480	GSE53963	ftp://ftp.ncbi.nlm.nih.gov/geo/samples/GSM1304nnn/GSM1304413/	GSM1304413	301304413
ovarian	Homo sapiens	serous	S3	3	GPL6480	GSE53963	ftp://ftp.ncbi.nlm.nih.gov/geo/samples/GSM1304nnn/GSM1304412/	GSM1304412	301304412
ovarian	Homo sapiens	serous	S3	3	GPL6480	GSE53963	ftp://ftp.ncbi.nlm.nih.gov/geo/samples/GSM1304nnn/GSM1304411/	GSM1304411	301304411
ovarian	Homo sapiens	serous	S3	3	GPL6480	GSE53963	ftp://ftp.ncbi.nlm.nih.gov/geo/samples/GSM1304nnn/GSM1304410/	GSM1304410	301304410
ovarian	Homo sapiens	serous	S3	3	GPL6480	GSE53963	ftp://ftp.ncbi.nlm.nih.gov/geo/samples/GSM1304nnn/GSM1304408/	GSM1304408	301304408
ovarian	Homo sapiens	serous	S3	3	GPL6480	GSE53963	ftp://ftp.ncbi.nlm.nih.gov/geo/samples/GSM1304nnn/GSM1304405/	GSM1304405	301304405
ovarian	Homo sapiens	serous	S3	3	GPL6480	GSE53963	ftp://ftp.ncbi.nlm.nih.gov/geo/samples/GSM1304nnn/GSM1304403/	GSM1304403	301304403
ovarian	Homo sapiens	serous	S3	3	GPL6480	GSE53963	ftp://ftp.ncbi.nlm.nih.gov/geo/samples/GSM1304nnn/GSM1304402/	GSM1304402	301304402
ovarian	Homo sapiens	serous	S3	3	GPL6480	GSE53963	ftp://ftp.ncbi.nlm.nih.gov/geo/samples/GSM1304nnn/GSM1304401/	GSM1304401	301304401
ovarian	Homo sapiens	serous	S3	3	GPL6480	GSE53963	ftp://ftp.ncbi.nlm.nih.gov/geo/samples/GSM1304nnn/GSM1304400/	GSM1304400	301304400
ovarian	Homo sapiens	serous	S3	3	GPL6480	GSE53963	ftp://ftp.ncbi.nlm.nih.gov/geo/samples/GSM1304nnn/GSM1304399/	GSM1304399	301304399
ovarian	Homo sapiens	serous	S3	3	GPL6480	GSE53963	ftp://ftp.ncbi.nlm.nih.gov/geo/samples/GSM1304nnn/GSM1304398/	GSM1304398	301304398
ovarian	Homo sapiens	serous	S3	3	GPL6480	GSE53963	ftp://ftp.ncbi.nlm.nih.gov/geo/samples/GSM1304nnn/GSM1304396/	GSM1304396	301304396
ovarian	Homo sapiens	serous	S3	3	GPL6480	GSE53963	ftp://ftp.ncbi.nlm.nih.gov/geo/samples/GSM1304nnn/GSM1304395/	GSM1304395	301304395
ovarian	Homo sapiens	serous	S3	3	GPL6480	GSE53963	ftp://ftp.ncbi.nlm.nih.gov/geo/samples/GSM1304nnn/GSM1304394/	GSM1304394	301304394
ovarian	Homo sapiens	serous	S3	3	GPL6480	GSE53963	ftp://ftp.ncbi.nlm.nih.gov/geo/samples/GSM1304nnn/GSM1304390/	GSM1304390	301304390
ovarian	Homo sapiens	serous	S3	3	GPL6480	GSE53963	ftp://ftp.ncbi.nlm.nih.gov/geo/samples/GSM1304nnn/GSM1304388/	GSM1304388	301304388
ovarian	Homo sapiens	serous	S3	3	GPL6480	GSE53963	ftp://ftp.ncbi.nlm.nih.gov/geo/samples/GSM1304nnn/GSM1304387/	GSM1304387	301304387
ovarian	Homo sapiens	serous	S3	3	GPL6480	GSE53963	ftp://ftp.ncbi.nlm.nih.gov/geo/samples/GSM1304nnn/GSM1304385/	GSM1304385	301304385
ovarian	Homo sapiens	serous	S3	3	GPL6480	GSE53963	ftp://ftp.ncbi.nlm.nih.gov/geo/samples/GSM1304nnn/GSM1304383/	GSM1304383	301304383
ovarian	Homo sapiens	serous	S3	3	GPL6480	GSE53963	ftp://ftp.ncbi.nlm.nih.gov/geo/samples/GSM1304nnn/GSM1304380/	GSM1304380	301304380
ovarian	Homo sapiens	serous	S3	3	GPL6480	GSE53963	ftp://ftp.ncbi.nlm.nih.gov/geo/samples/GSM1304nnn/GSM1304379/	GSM1304379	301304379
ovarian	Homo sapiens	serous	S3	3	GPL6480	GSE53963	ftp://ftp.ncbi.nlm.nih.gov/geo/samples/GSM1304nnn/GSM1304378/	GSM1304378	301304378
ovarian	Homo sapiens	serous	S3	3	GPL6480	GSE53963	ftp://ftp.ncbi.nlm.nih.gov/geo/samples/GSM1304nnn/GSM1304377/	GSM1304377	301304377
ovarian	Homo sapiens	serous	S3	3	GPL6480	GSE53963	ftp://ftp.ncbi.nlm.nih.gov/geo/samples/GSM1304nnn/GSM1304376/	GSM1304376	301304376
ovarian	Homo sapiens	serous	S3	3	GPL6480	GSE53963	ftp://ftp.ncbi.nlm.nih.gov/geo/samples/GSM1304nnn/GSM1304374/	GSM1304374	301304374
ovarian	Homo sapiens	serous	S3	3	GPL6480	GSE53963	ftp://ftp.ncbi.nlm.nih.gov/geo/samples/GSM1304nnn/GSM1304373/	GSM1304373	301304373
ovarian	Homo sapiens	serous	S3	3	GPL6480	GSE53963	ftp://ftp.ncbi.nlm.nih.gov/geo/samples/GSM1304nnn/GSM1304372/	GSM1304372	301304372
ovarian	Homo sapiens	serous	S3	3	GPL6480	GSE53963	ftp://ftp.ncbi.nlm.nih.gov/geo/samples/GSM1304nnn/GSM1304371/	GSM1304371	301304371
ovarian	Homo sapiens	serous	S3	3	GPL6480	GSE53963	ftp://ftp.ncbi.nlm.nih.gov/geo/samples/GSM1304nnn/GSM1304369/	GSM1304369	301304369
ovarian	Homo sapiens	serous	S3	3	GPL6480	GSE53963	ftp://ftp.ncbi.nlm.nih.gov/geo/samples/GSM1304nnn/GSM1304368/	GSM1304368	301304368
ovarian	Homo sapiens	serous	S3	3	GPL6480	GSE53963	ftp://ftp.ncbi.nlm.nih.gov/geo/samples/GSM1304nnn/GSM1304365/	GSM1304365	301304365
ovarian	Homo sapiens	serous	S3	3	GPL6480	GSE53963	ftp://ftp.ncbi.nlm.nih.gov/geo/samples/GSM1304nnn/GSM1304364/	GSM1304364	301304364
ovarian	Homo sapiens	serous	S3	3	GPL6480	GSE53963	ftp://ftp.ncbi.nlm.nih.gov/geo/samples/GSM1304nnn/GSM1304363/	GSM1304363	301304363
ovarian	Homo sapiens	serous	S3	3	GPL6480	GSE53963	ftp://ftp.ncbi.nlm.nih.gov/geo/samples/GSM1304nnn/GSM1304362/	GSM1304362	301304362
ovarian	Homo sapiens	serous	S3	3	GPL6480	GSE53963	ftp://ftp.ncbi.nlm.nih.gov/geo/samples/GSM1304nnn/GSM1304359/	GSM1304359	301304359
ovarian	Homo sapiens	serous	S3	3	GPL6480	GSE53963	ftp://ftp.ncbi.nlm.nih.gov/geo/samples/GSM1304nnn/GSM1304358/	GSM1304358	301304358
ovarian	Homo sapiens	serous	S3	3	GPL6480	GSE53963	ftp://ftp.ncbi.nlm.nih.gov/geo/samples/GSM1304nnn/GSM1304357/	GSM1304357	301304357
ovarian	Homo sapiens	serous	S3	3	GPL6480	GSE53963	ftp://ftp.ncbi.nlm.nih.gov/geo/samples/GSM1304nnn/GSM1304352/	GSM1304352	301304352
ovarian	Homo sapiens	serous	S3	3	GPL6480	GSE53963	ftp://ftp.ncbi.nlm.nih.gov/geo/samples/GSM1304nnn/GSM1304351/	GSM1304351	301304351
ovarian	Homo sapiens	serous	S3	3	GPL6480	GSE53963	ftp://ftp.ncbi.nlm.nih.gov/geo/samples/GSM1304nnn/GSM1304349/	GSM1304349	301304349
ovarian	Homo sapiens	serous	S3	3	GPL6480	GSE53963	ftp://ftp.ncbi.nlm.nih.gov/geo/samples/GSM1304nnn/GSM1304348/	GSM1304348	301304348
ovarian	Homo sapiens	serous	S3	3	GPL6480	GSE53963	ftp://ftp.ncbi.nlm.nih.gov/geo/samples/GSM1304nnn/GSM1304346/	GSM1304346	301304346
ovarian	Homo sapiens	serous	S3	3	GPL6480	GSE53963	ftp://ftp.ncbi.nlm.nih.gov/geo/samples/GSM1304nnn/GSM1304345/	GSM1304345	301304345
ovarian	Homo sapiens	serous	S3	3	GPL6480	GSE53963	ftp://ftp.ncbi.nlm.nih.gov/geo/samples/GSM1304nnn/GSM1304344/	GSM1304344	301304344
ovarian	Homo sapiens	serous	S3	3	GPL6480	GSE53963	ftp://ftp.ncbi.nlm.nih.gov/geo/samples/GSM1304nnn/GSM1304342/	GSM1304342	301304342
ovarian	Homo sapiens	serous	S3	3	GPL6480	GSE53963	ftp://ftp.ncbi.nlm.nih.gov/geo/samples/GSM1304nnn/GSM1304341/	GSM1304341	301304341
ovarian	Homo sapiens	serous	S3	3	GPL6480	GSE53963	ftp://ftp.ncbi.nlm.nih.gov/geo/samples/GSM1304nnn/GSM1304340/	GSM1304340	301304340
ovarian	Homo sapiens	serous	S3	3	GPL6480	GSE53963	ftp://ftp.ncbi.nlm.nih.gov/geo/samples/GSM1304nnn/GSM1304339/	GSM1304339	301304339
ovarian	Homo sapiens	serous	S3	3	GPL6480	GSE53963	ftp://ftp.ncbi.nlm.nih.gov/geo/samples/GSM1304nnn/GSM1304338/	GSM1304338	301304338
ovarian	Homo sapiens	serous	S3	3	GPL6480	GSE53963	ftp://ftp.ncbi.nlm.nih.gov/geo/samples/GSM1304nnn/GSM1304337/	GSM1304337	301304337
ovarian	Homo sapiens	serous	S3	3	GPL6480	GSE53963	ftp://ftp.ncbi.nlm.nih.gov/geo/samples/GSM1304nnn/GSM1304336/	GSM1304336	301304336
ovarian	Homo sapiens	serous	S3	3	GPL6480	GSE53963	ftp://ftp.ncbi.nlm.nih.gov/geo/samples/GSM1304nnn/GSM1304335/	GSM1304335	301304335
ovarian	Homo sapiens	serous	S3	3	GPL6480	GSE53963	ftp://ftp.ncbi.nlm.nih.gov/geo/samples/GSM1304nnn/GSM1304334/	GSM1304334	301304334
ovarian	Homo sapiens	serous	S3	3	GPL6480	GSE53963	ftp://ftp.ncbi.nlm.nih.gov/geo/samples/GSM1304nnn/GSM1304333/	GSM1304333	301304333
ovarian	Homo sapiens	serous	S3	3	GPL6480	GSE53963	ftp://ftp.ncbi.nlm.nih.gov/geo/samples/GSM1304nnn/GSM1304332/	GSM1304332	301304332
ovarian	Homo sapiens	serous	S3	3	GPL6480	GSE53963	ftp://ftp.ncbi.nlm.nih.gov/geo/samples/GSM1304nnn/GSM1304331/	GSM1304331	301304331
ovarian	Homo sapiens	serous	S3	3	GPL6480	GSE53963	ftp://ftp.ncbi.nlm.nih.gov/geo/samples/GSM1304nnn/GSM1304330/	GSM1304330	301304330
ovarian	Homo sapiens	serous	S3	3	GPL6480	GSE53963	ftp://ftp.ncbi.nlm.nih.gov/geo/samples/GSM1304nnn/GSM1304329/	GSM1304329	301304329
ovarian	Homo sapiens	serous	S3	3	GPL6480	GSE53963	ftp://ftp.ncbi.nlm.nih.gov/geo/samples/GSM1304nnn/GSM1304327/	GSM1304327	301304327
ovarian	Homo sapiens	serous	S3	3	GPL6480	GSE53963	ftp://ftp.ncbi.nlm.nih.gov/geo/samples/GSM1304nnn/GSM1304326/	GSM1304326	301304326
ovarian	Homo sapiens	serous	S3	3	GPL6480	GSE53963	ftp://ftp.ncbi.nlm.nih.gov/geo/samples/GSM1304nnn/GSM1304325/	GSM1304325	301304325
ovarian	Homo sapiens	serous	S3	3	GPL6480	GSE53963	ftp://ftp.ncbi.nlm.nih.gov/geo/samples/GSM1304nnn/GSM1304324/	GSM1304324	301304324
ovarian	Homo sapiens	serous	S3	3	GPL6480	GSE53963	ftp://ftp.ncbi.nlm.nih.gov/geo/samples/GSM1304nnn/GSM1304322/	GSM1304322	301304322
ovarian	Homo sapiens	serous	S3	3	GPL6480	GSE53963	ftp://ftp.ncbi.nlm.nih.gov/geo/samples/GSM1304nnn/GSM1304319/	GSM1304319	301304319
ovarian	Homo sapiens	serous	S3	3	GPL6480	GSE53963	ftp://ftp.ncbi.nlm.nih.gov/geo/samples/GSM1304nnn/GSM1304317/	GSM1304317	301304317
ovarian	Homo sapiens	serous	S3	3	GPL6480	GSE53963	ftp://ftp.ncbi.nlm.nih.gov/geo/samples/GSM1304nnn/GSM1304316/	GSM1304316	301304316
ovarian	Homo sapiens	serous	S3	3	GPL6480	GSE53963	ftp://ftp.ncbi.nlm.nih.gov/geo/samples/GSM1304nnn/GSM1304315/	GSM1304315	301304315
ovarian	Homo sapiens	serous	S3	3	GPL6480	GSE53963	ftp://ftp.ncbi.nlm.nih.gov/geo/samples/GSM1304nnn/GSM1304314/	GSM1304314	301304314
ovarian	Homo sapiens	serous	S3	3	GPL6480	GSE53963	ftp://ftp.ncbi.nlm.nih.gov/geo/samples/GSM1304nnn/GSM1304313/	GSM1304313	301304313
ovarian	Homo sapiens	serous	S3	3	GPL6480	GSE53963	ftp://ftp.ncbi.nlm.nih.gov/geo/samples/GSM1304nnn/GSM1304311/	GSM1304311	301304311
ovarian	Homo sapiens	serous	S3	3	GPL6480	GSE53963	ftp://ftp.ncbi.nlm.nih.gov/geo/samples/GSM1304nnn/GSM1304310/	GSM1304310	301304310
ovarian	Homo sapiens	serous	S3	3	GPL6480	GSE53963	ftp://ftp.ncbi.nlm.nih.gov/geo/samples/GSM1304nnn/GSM1304308/	GSM1304308	301304308
ovarian	Homo sapiens	serous	S3	3	GPL6480	GSE53963	ftp://ftp.ncbi.nlm.nih.gov/geo/samples/GSM1304nnn/GSM1304307/	GSM1304307	301304307
ovarian	Homo sapiens	serous	S3	3	GPL6480	GSE53963	ftp://ftp.ncbi.nlm.nih.gov/geo/samples/GSM1304nnn/GSM1304306/	GSM1304306	301304306
ovarian	Homo sapiens	serous	S3	3	GPL6480	GSE53963	ftp://ftp.ncbi.nlm.nih.gov/geo/samples/GSM1304nnn/GSM1304304/	GSM1304304	301304304
ovarian	Homo sapiens	serous	S3	3	GPL6480	GSE53963	ftp://ftp.ncbi.nlm.nih.gov/geo/samples/GSM1304nnn/GSM1304301/	GSM1304301	301304301
ovarian	Homo sapiens	serous	S3	3	GPL6480	GSE53963	ftp://ftp.ncbi.nlm.nih.gov/geo/samples/GSM1304nnn/GSM1304300/	GSM1304300	301304300
ovarian	Homo sapiens	serous	S3	3	GPL6480	GSE53963	ftp://ftp.ncbi.nlm.nih.gov/geo/samples/GSM1304nnn/GSM1304296/	GSM1304296	301304296
ovarian	Homo sapiens	serous	S3	3	GPL6480	GSE53963	ftp://ftp.ncbi.nlm.nih.gov/geo/samples/GSM1304nnn/GSM1304293/	GSM1304293	301304293
ovarian	Homo sapiens	serous	S3	3	GPL6480	GSE53963	ftp://ftp.ncbi.nlm.nih.gov/geo/samples/GSM1304nnn/GSM1304291/	GSM1304291	301304291
ovarian	Homo sapiens	serous	S3	3	GPL6480	GSE53963	ftp://ftp.ncbi.nlm.nih.gov/geo/samples/GSM1304nnn/GSM1304290/	GSM1304290	301304290
ovarian	Homo sapiens	serous	S3	3	GPL6480	GSE53963	ftp://ftp.ncbi.nlm.nih.gov/geo/samples/GSM1304nnn/GSM1304289/	GSM1304289	301304289
ovarian	Homo sapiens	serous	S3	3	GPL6480	GSE53963	ftp://ftp.ncbi.nlm.nih.gov/geo/samples/GSM1304nnn/GSM1304287/	GSM1304287	301304287
ovarian	Homo sapiens	serous	S3	3	GPL6480	GSE53963	ftp://ftp.ncbi.nlm.nih.gov/geo/samples/GSM1304nnn/GSM1304286/	GSM1304286	301304286
ovarian	Homo sapiens	serous	S3	3	GPL6480	GSE53963	ftp://ftp.ncbi.nlm.nih.gov/geo/samples/GSM1304nnn/GSM1304285/	GSM1304285	301304285
ovarian	Homo sapiens	serous	S3	3	GPL6480	GSE53963	ftp://ftp.ncbi.nlm.nih.gov/geo/samples/GSM1304nnn/GSM1304284/	GSM1304284	301304284
ovarian	Homo sapiens	serous	S3	3	GPL6480	GSE53963	ftp://ftp.ncbi.nlm.nih.gov/geo/samples/GSM1304nnn/GSM1304283/	GSM1304283	301304283
ovarian	Homo sapiens	serous	S3	3	GPL6480	GSE53963	ftp://ftp.ncbi.nlm.nih.gov/geo/samples/GSM1304nnn/GSM1304282/	GSM1304282	301304282
ovarian	Homo sapiens	serous	S3	3	GPL6480	GSE53963	ftp://ftp.ncbi.nlm.nih.gov/geo/samples/GSM1304nnn/GSM1304280/	GSM1304280	301304280
ovarian	Homo sapiens	serous	S3	3	GPL6480	GSE53963	ftp://ftp.ncbi.nlm.nih.gov/geo/samples/GSM1304nnn/GSM1304278/	GSM1304278	301304278
ovarian	Homo sapiens	serous	S3	3	GPL6480	GSE53963	ftp://ftp.ncbi.nlm.nih.gov/geo/samples/GSM1304nnn/GSM1304277/	GSM1304277	301304277
ovarian	Homo sapiens	serous	S3	3	GPL6480	GSE53963	ftp://ftp.ncbi.nlm.nih.gov/geo/samples/GSM1304nnn/GSM1304276/	GSM1304276	301304276
ovarian	Homo sapiens	serous	S3	3	GPL6480	GSE53963	ftp://ftp.ncbi.nlm.nih.gov/geo/samples/GSM1304nnn/GSM1304272/	GSM1304272	301304272
ovarian	Homo sapiens	serous	S3	3	GPL6480	GSE53963	ftp://ftp.ncbi.nlm.nih.gov/geo/samples/GSM1304nnn/GSM1304271/	GSM1304271	301304271
ovarian	Homo sapiens	serous	S3	3	GPL6480	GSE53963	ftp://ftp.ncbi.nlm.nih.gov/geo/samples/GSM1304nnn/GSM1304268/	GSM1304268	301304268
ovarian	Homo sapiens	serous	S3	3	GPL6480	GSE53963	ftp://ftp.ncbi.nlm.nih.gov/geo/samples/GSM1304nnn/GSM1304265/	GSM1304265	301304265
ovarian	Homo sapiens	serous	S3	3	GPL6480	GSE53963	ftp://ftp.ncbi.nlm.nih.gov/geo/samples/GSM1304nnn/GSM1304264/	GSM1304264	301304264
ovarian	Homo sapiens	serous	S3	3	GPL6480	GSE53963	ftp://ftp.ncbi.nlm.nih.gov/geo/samples/GSM1304nnn/GSM1304262/	GSM1304262	301304262
ovarian	Homo sapiens	serous	S3	3	GPL6480	GSE53963	ftp://ftp.ncbi.nlm.nih.gov/geo/samples/GSM1304nnn/GSM1304261/	GSM1304261	301304261
ovarian	Homo sapiens	serous	S3	3	GPL6480	GSE53963	ftp://ftp.ncbi.nlm.nih.gov/geo/samples/GSM1304nnn/GSM1304260/	GSM1304260	301304260
ovarian	Homo sapiens	serous	S3	3	GPL6480	GSE53963	ftp://ftp.ncbi.nlm.nih.gov/geo/samples/GSM1304nnn/GSM1304259/	GSM1304259	301304259
ovarian	Homo sapiens	serous	S3	3	GPL6480	GSE53963	ftp://ftp.ncbi.nlm.nih.gov/geo/samples/GSM1304nnn/GSM1304258/	GSM1304258	301304258
ovarian	Homo sapiens	serous	S3	3	GPL6480	GSE53963	ftp://ftp.ncbi.nlm.nih.gov/geo/samples/GSM1304nnn/GSM1304257/	GSM1304257	301304257
ovarian	Homo sapiens	serous	S3	3	GPL6480	GSE53963	ftp://ftp.ncbi.nlm.nih.gov/geo/samples/GSM1304nnn/GSM1304256/	GSM1304256	301304256
ovarian	Homo sapiens	serous	S3	3	GPL6480	GSE53963	ftp://ftp.ncbi.nlm.nih.gov/geo/samples/GSM1304nnn/GSM1304255/	GSM1304255	301304255
ovarian	Homo sapiens	serous	S3	3	GPL6480	GSE53963	ftp://ftp.ncbi.nlm.nih.gov/geo/samples/GSM1304nnn/GSM1304254/	GSM1304254	301304254
ovarian	Homo sapiens	serous	S3	3	GPL6480	GSE53963	ftp://ftp.ncbi.nlm.nih.gov/geo/samples/GSM1304nnn/GSM1304253/	GSM1304253	301304253
ovarian	Homo sapiens	serous	S3	3	GPL6480	GSE53963	ftp://ftp.ncbi.nlm.nih.gov/geo/samples/GSM1304nnn/GSM1304252/	GSM1304252	301304252
ovarian	Homo sapiens	serous	S3	3	GPL6480	GSE53963	ftp://ftp.ncbi.nlm.nih.gov/geo/samples/GSM1304nnn/GSM1304250/	GSM1304250	301304250
ovarian	Homo sapiens	serous	S3	3	GPL6480	GSE53963	ftp://ftp.ncbi.nlm.nih.gov/geo/samples/GSM1304nnn/GSM1304249/	GSM1304249	301304249
ovarian	Homo sapiens	serous	S3	3	GPL6480	GSE53963	ftp://ftp.ncbi.nlm.nih.gov/geo/samples/GSM1304nnn/GSM1304247/	GSM1304247	301304247
ovarian	Homo sapiens	serous	S3	3	GPL7264	GSE51088	ftp://ftp.ncbi.nlm.nih.gov/geo/samples/GSM1238nnn/GSM1238273/	GSM1238273	301238273
ovarian	Homo sapiens	serous	S3	3	GPL7264	GSE51088	ftp://ftp.ncbi.nlm.nih.gov/geo/samples/GSM1238nnn/GSM1238287/	GSM1238287	301238287
ovarian	Homo sapiens	serous	S3	3	GPL7264	GSE51088	ftp://ftp.ncbi.nlm.nih.gov/geo/samples/GSM1238nnn/GSM1238236/	GSM1238236	301238236
ovarian	Homo sapiens	serous	S3	3	GPL7264	GSE51088	ftp://ftp.ncbi.nlm.nih.gov/geo/samples/GSM1238nnn/GSM1238201/	GSM1238201	301238201
ovarian	Homo sapiens	serous	S3	3	GPL7264	GSE51088	ftp://ftp.ncbi.nlm.nih.gov/geo/samples/GSM1238nnn/GSM1238179/	GSM1238179	301238179
ovarian	Homo sapiens	serous	S3	3	GPL7264	GSE51088	ftp://ftp.ncbi.nlm.nih.gov/geo/samples/GSM1238nnn/GSM1238297/	GSM1238297	301238297
ovarian	Homo sapiens	serous	S3	3	GPL7264	GSE51088	ftp://ftp.ncbi.nlm.nih.gov/geo/samples/GSM1238nnn/GSM1238291/	GSM1238291	301238291
ovarian	Homo sapiens	serous	S3	3	GPL7264	GSE51088	ftp://ftp.ncbi.nlm.nih.gov/geo/samples/GSM1238nnn/GSM1238278/	GSM1238278	301238278
ovarian	Homo sapiens	serous	S3	3	GPL7264	GSE51088	ftp://ftp.ncbi.nlm.nih.gov/geo/samples/GSM1238nnn/GSM1238276/	GSM1238276	301238276
ovarian	Homo sapiens	serous	S3	3	GPL7264	GSE51088	ftp://ftp.ncbi.nlm.nih.gov/geo/samples/GSM1238nnn/GSM1238275/	GSM1238275	301238275
ovarian	Homo sapiens	serous	S3	3	GPL7264	GSE51088	ftp://ftp.ncbi.nlm.nih.gov/geo/samples/GSM1238nnn/GSM1238268/	GSM1238268	301238268
ovarian	Homo sapiens	serous	S3	3	GPL7264	GSE51088	ftp://ftp.ncbi.nlm.nih.gov/geo/samples/GSM1238nnn/GSM1238232/	GSM1238232	301238232
ovarian	Homo sapiens	serous	S3	3	GPL7264	GSE51088	ftp://ftp.ncbi.nlm.nih.gov/geo/samples/GSM1238nnn/GSM1238216/	GSM1238216	301238216
ovarian	Homo sapiens	serous	S3	3	GPL7264	GSE51088	ftp://ftp.ncbi.nlm.nih.gov/geo/samples/GSM1238nnn/GSM1238184/	GSM1238184	301238184
ovarian	Homo sapiens	serous	S3	3	GPL7264	GSE51088	ftp://ftp.ncbi.nlm.nih.gov/geo/samples/GSM1238nnn/GSM1238165/	GSM1238165	301238165
ovarian	Homo sapiens	serous	S3	3	GPL7264	GSE51088	ftp://ftp.ncbi.nlm.nih.gov/geo/samples/GSM1238nnn/GSM1238151/	GSM1238151	301238151
ovarian	Homo sapiens	serous	S3	3	GPL7264	GSE51088	ftp://ftp.ncbi.nlm.nih.gov/geo/samples/GSM1238nnn/GSM1238149/	GSM1238149	301238149
ovarian	Homo sapiens	serous	S3	3	GPL7264	GSE51088	ftp://ftp.ncbi.nlm.nih.gov/geo/samples/GSM1238nnn/GSM1238315/	GSM1238315	301238315
ovarian	Homo sapiens	serous	S3	3	GPL7264	GSE51088	ftp://ftp.ncbi.nlm.nih.gov/geo/samples/GSM1238nnn/GSM1238314/	GSM1238314	301238314
ovarian	Homo sapiens	serous	S3	3	GPL7264	GSE51088	ftp://ftp.ncbi.nlm.nih.gov/geo/samples/GSM1238nnn/GSM1238313/	GSM1238313	301238313
ovarian	Homo sapiens	serous	S3	3	GPL7264	GSE51088	ftp://ftp.ncbi.nlm.nih.gov/geo/samples/GSM1238nnn/GSM1238312/	GSM1238312	301238312
ovarian	Homo sapiens	serous	S3	3	GPL7264	GSE51088	ftp://ftp.ncbi.nlm.nih.gov/geo/samples/GSM1238nnn/GSM1238308/	GSM1238308	301238308
ovarian	Homo sapiens	serous	S3	3	GPL7264	GSE51088	ftp://ftp.ncbi.nlm.nih.gov/geo/samples/GSM1238nnn/GSM1238305/	GSM1238305	301238305
ovarian	Homo sapiens	serous	S3	3	GPL7264	GSE51088	ftp://ftp.ncbi.nlm.nih.gov/geo/samples/GSM1238nnn/GSM1238304/	GSM1238304	301238304
ovarian	Homo sapiens	serous	S3	3	GPL7264	GSE51088	ftp://ftp.ncbi.nlm.nih.gov/geo/samples/GSM1238nnn/GSM1238303/	GSM1238303	301238303
ovarian	Homo sapiens	serous	S3	3	GPL7264	GSE51088	ftp://ftp.ncbi.nlm.nih.gov/geo/samples/GSM1238nnn/GSM1238301/	GSM1238301	301238301
ovarian	Homo sapiens	serous	S3	3	GPL7264	GSE51088	ftp://ftp.ncbi.nlm.nih.gov/geo/samples/GSM1238nnn/GSM1238298/	GSM1238298	301238298
ovarian	Homo sapiens	serous	S3	3	GPL7264	GSE51088	ftp://ftp.ncbi.nlm.nih.gov/geo/samples/GSM1238nnn/GSM1238295/	GSM1238295	301238295
ovarian	Homo sapiens	serous	S3	3	GPL7264	GSE51088	ftp://ftp.ncbi.nlm.nih.gov/geo/samples/GSM1238nnn/GSM1238293/	GSM1238293	301238293
ovarian	Homo sapiens	serous	S3	3	GPL7264	GSE51088	ftp://ftp.ncbi.nlm.nih.gov/geo/samples/GSM1238nnn/GSM1238290/	GSM1238290	301238290
ovarian	Homo sapiens	serous	S3	3	GPL7264	GSE51088	ftp://ftp.ncbi.nlm.nih.gov/geo/samples/GSM1238nnn/GSM1238288/	GSM1238288	301238288
ovarian	Homo sapiens	serous	S3	3	GPL7264	GSE51088	ftp://ftp.ncbi.nlm.nih.gov/geo/samples/GSM1238nnn/GSM1238284/	GSM1238284	301238284
ovarian	Homo sapiens	serous	S3	3	GPL7264	GSE51088	ftp://ftp.ncbi.nlm.nih.gov/geo/samples/GSM1238nnn/GSM1238283/	GSM1238283	301238283
ovarian	Homo sapiens	serous	S3	3	GPL7264	GSE51088	ftp://ftp.ncbi.nlm.nih.gov/geo/samples/GSM1238nnn/GSM1238282/	GSM1238282	301238282
ovarian	Homo sapiens	serous	S3	3	GPL7264	GSE51088	ftp://ftp.ncbi.nlm.nih.gov/geo/samples/GSM1238nnn/GSM1238279/	GSM1238279	301238279
ovarian	Homo sapiens	serous	S3	3	GPL7264	GSE51088	ftp://ftp.ncbi.nlm.nih.gov/geo/samples/GSM1238nnn/GSM1238277/	GSM1238277	301238277
ovarian	Homo sapiens	serous	S3	3	GPL7264	GSE51088	ftp://ftp.ncbi.nlm.nih.gov/geo/samples/GSM1238nnn/GSM1238272/	GSM1238272	301238272
ovarian	Homo sapiens	serous	S3	3	GPL7264	GSE51088	ftp://ftp.ncbi.nlm.nih.gov/geo/samples/GSM1238nnn/GSM1238270/	GSM1238270	301238270
ovarian	Homo sapiens	serous	S3	3	GPL7264	GSE51088	ftp://ftp.ncbi.nlm.nih.gov/geo/samples/GSM1238nnn/GSM1238269/	GSM1238269	301238269
ovarian	Homo sapiens	serous	S3	3	GPL7264	GSE51088	ftp://ftp.ncbi.nlm.nih.gov/geo/samples/GSM1238nnn/GSM1238264/	GSM1238264	301238264
ovarian	Homo sapiens	serous	S3	3	GPL7264	GSE51088	ftp://ftp.ncbi.nlm.nih.gov/geo/samples/GSM1238nnn/GSM1238263/	GSM1238263	301238263
ovarian	Homo sapiens	serous	S3	3	GPL7264	GSE51088	ftp://ftp.ncbi.nlm.nih.gov/geo/samples/GSM1238nnn/GSM1238261/	GSM1238261	301238261
ovarian	Homo sapiens	serous	S3	3	GPL7264	GSE51088	ftp://ftp.ncbi.nlm.nih.gov/geo/samples/GSM1238nnn/GSM1238260/	GSM1238260	301238260
ovarian	Homo sapiens	serous	S3	3	GPL7264	GSE51088	ftp://ftp.ncbi.nlm.nih.gov/geo/samples/GSM1238nnn/GSM1238257/	GSM1238257	301238257
ovarian	Homo sapiens	serous	S3	3	GPL7264	GSE51088	ftp://ftp.ncbi.nlm.nih.gov/geo/samples/GSM1238nnn/GSM1238256/	GSM1238256	301238256
ovarian	Homo sapiens	serous	S3	3	GPL7264	GSE51088	ftp://ftp.ncbi.nlm.nih.gov/geo/samples/GSM1238nnn/GSM1238253/	GSM1238253	301238253
ovarian	Homo sapiens	serous	S3	3	GPL7264	GSE51088	ftp://ftp.ncbi.nlm.nih.gov/geo/samples/GSM1238nnn/GSM1238251/	GSM1238251	301238251
ovarian	Homo sapiens	serous	S3	3	GPL7264	GSE51088	ftp://ftp.ncbi.nlm.nih.gov/geo/samples/GSM1238nnn/GSM1238249/	GSM1238249	301238249
ovarian	Homo sapiens	serous	S3	3	GPL7264	GSE51088	ftp://ftp.ncbi.nlm.nih.gov/geo/samples/GSM1238nnn/GSM1238245/	GSM1238245	301238245
ovarian	Homo sapiens	serous	S3	3	GPL7264	GSE51088	ftp://ftp.ncbi.nlm.nih.gov/geo/samples/GSM1238nnn/GSM1238243/	GSM1238243	301238243
ovarian	Homo sapiens	serous	S3	3	GPL7264	GSE51088	ftp://ftp.ncbi.nlm.nih.gov/geo/samples/GSM1238nnn/GSM1238241/	GSM1238241	301238241
ovarian	Homo sapiens	serous	S3	3	GPL7264	GSE51088	ftp://ftp.ncbi.nlm.nih.gov/geo/samples/GSM1238nnn/GSM1238237/	GSM1238237	301238237
ovarian	Homo sapiens	serous	S3	3	GPL7264	GSE51088	ftp://ftp.ncbi.nlm.nih.gov/geo/samples/GSM1238nnn/GSM1238235/	GSM1238235	301238235
ovarian	Homo sapiens	serous	S3	3	GPL7264	GSE51088	ftp://ftp.ncbi.nlm.nih.gov/geo/samples/GSM1238nnn/GSM1238231/	GSM1238231	301238231
ovarian	Homo sapiens	serous	S3	3	GPL7264	GSE51088	ftp://ftp.ncbi.nlm.nih.gov/geo/samples/GSM1238nnn/GSM1238229/	GSM1238229	301238229
ovarian	Homo sapiens	serous	S3	3	GPL7264	GSE51088	ftp://ftp.ncbi.nlm.nih.gov/geo/samples/GSM1238nnn/GSM1238228/	GSM1238228	301238228
ovarian	Homo sapiens	serous	S3	3	GPL7264	GSE51088	ftp://ftp.ncbi.nlm.nih.gov/geo/samples/GSM1238nnn/GSM1238226/	GSM1238226	301238226
ovarian	Homo sapiens	serous	S3	3	GPL7264	GSE51088	ftp://ftp.ncbi.nlm.nih.gov/geo/samples/GSM1238nnn/GSM1238225/	GSM1238225	301238225
ovarian	Homo sapiens	serous	S3	3	GPL7264	GSE51088	ftp://ftp.ncbi.nlm.nih.gov/geo/samples/GSM1238nnn/GSM1238224/	GSM1238224	301238224
ovarian	Homo sapiens	serous	S3	3	GPL7264	GSE51088	ftp://ftp.ncbi.nlm.nih.gov/geo/samples/GSM1238nnn/GSM1238223/	GSM1238223	301238223
ovarian	Homo sapiens	serous	S3	3	GPL7264	GSE51088	ftp://ftp.ncbi.nlm.nih.gov/geo/samples/GSM1238nnn/GSM1238221/	GSM1238221	301238221
ovarian	Homo sapiens	serous	S3	3	GPL7264	GSE51088	ftp://ftp.ncbi.nlm.nih.gov/geo/samples/GSM1238nnn/GSM1238220/	GSM1238220	301238220
ovarian	Homo sapiens	serous	S3	3	GPL7264	GSE51088	ftp://ftp.ncbi.nlm.nih.gov/geo/samples/GSM1238nnn/GSM1238217/	GSM1238217	301238217
ovarian	Homo sapiens	serous	S3	3	GPL7264	GSE51088	ftp://ftp.ncbi.nlm.nih.gov/geo/samples/GSM1238nnn/GSM1238215/	GSM1238215	301238215
ovarian	Homo sapiens	serous	S3	3	GPL7264	GSE51088	ftp://ftp.ncbi.nlm.nih.gov/geo/samples/GSM1238nnn/GSM1238213/	GSM1238213	301238213
ovarian	Homo sapiens	serous	S3	3	GPL7264	GSE51088	ftp://ftp.ncbi.nlm.nih.gov/geo/samples/GSM1238nnn/GSM1238208/	GSM1238208	301238208
ovarian	Homo sapiens	serous	S3	3	GPL7264	GSE51088	ftp://ftp.ncbi.nlm.nih.gov/geo/samples/GSM1238nnn/GSM1238207/	GSM1238207	301238207
ovarian	Homo sapiens	serous	S3	3	GPL7264	GSE51088	ftp://ftp.ncbi.nlm.nih.gov/geo/samples/GSM1238nnn/GSM1238205/	GSM1238205	301238205
ovarian	Homo sapiens	serous	S3	3	GPL7264	GSE51088	ftp://ftp.ncbi.nlm.nih.gov/geo/samples/GSM1238nnn/GSM1238200/	GSM1238200	301238200
ovarian	Homo sapiens	serous	S3	3	GPL7264	GSE51088	ftp://ftp.ncbi.nlm.nih.gov/geo/samples/GSM1238nnn/GSM1238197/	GSM1238197	301238197
ovarian	Homo sapiens	serous	S3	3	GPL7264	GSE51088	ftp://ftp.ncbi.nlm.nih.gov/geo/samples/GSM1238nnn/GSM1238195/	GSM1238195	301238195
ovarian	Homo sapiens	serous	S3	3	GPL7264	GSE51088	ftp://ftp.ncbi.nlm.nih.gov/geo/samples/GSM1238nnn/GSM1238193/	GSM1238193	301238193
ovarian	Homo sapiens	serous	S3	3	GPL7264	GSE51088	ftp://ftp.ncbi.nlm.nih.gov/geo/samples/GSM1238nnn/GSM1238192/	GSM1238192	301238192
ovarian	Homo sapiens	serous	S3	3	GPL7264	GSE51088	ftp://ftp.ncbi.nlm.nih.gov/geo/samples/GSM1238nnn/GSM1238190/	GSM1238190	301238190
ovarian	Homo sapiens	serous	S3	3	GPL7264	GSE51088	ftp://ftp.ncbi.nlm.nih.gov/geo/samples/GSM1238nnn/GSM1238189/	GSM1238189	301238189
ovarian	Homo sapiens	serous	S3	3	GPL7264	GSE51088	ftp://ftp.ncbi.nlm.nih.gov/geo/samples/GSM1238nnn/GSM1238188/	GSM1238188	301238188
ovarian	Homo sapiens	serous	S3	3	GPL7264	GSE51088	ftp://ftp.ncbi.nlm.nih.gov/geo/samples/GSM1238nnn/GSM1238186/	GSM1238186	301238186
ovarian	Homo sapiens	serous	S3	3	GPL7264	GSE51088	ftp://ftp.ncbi.nlm.nih.gov/geo/samples/GSM1238nnn/GSM1238182/	GSM1238182	301238182
ovarian	Homo sapiens	serous	S3	3	GPL7264	GSE51088	ftp://ftp.ncbi.nlm.nih.gov/geo/samples/GSM1238nnn/GSM1238181/	GSM1238181	301238181
ovarian	Homo sapiens	serous	S3	3	GPL7264	GSE51088	ftp://ftp.ncbi.nlm.nih.gov/geo/samples/GSM1238nnn/GSM1238176/	GSM1238176	301238176
ovarian	Homo sapiens	serous	S3	3	GPL7264	GSE51088	ftp://ftp.ncbi.nlm.nih.gov/geo/samples/GSM1238nnn/GSM1238174/	GSM1238174	301238174
ovarian	Homo sapiens	serous	S3	3	GPL7264	GSE51088	ftp://ftp.ncbi.nlm.nih.gov/geo/samples/GSM1238nnn/GSM1238173/	GSM1238173	301238173
ovarian	Homo sapiens	serous	S3	3	GPL7264	GSE51088	ftp://ftp.ncbi.nlm.nih.gov/geo/samples/GSM1238nnn/GSM1238172/	GSM1238172	301238172
ovarian	Homo sapiens	serous	S3	3	GPL7264	GSE51088	ftp://ftp.ncbi.nlm.nih.gov/geo/samples/GSM1238nnn/GSM1238168/	GSM1238168	301238168
ovarian	Homo sapiens	serous	S3	3	GPL7264	GSE51088	ftp://ftp.ncbi.nlm.nih.gov/geo/samples/GSM1238nnn/GSM1238167/	GSM1238167	301238167
ovarian	Homo sapiens	serous	S3	3	GPL7264	GSE51088	ftp://ftp.ncbi.nlm.nih.gov/geo/samples/GSM1238nnn/GSM1238166/	GSM1238166	301238166
ovarian	Homo sapiens	serous	S3	3	GPL7264	GSE51088	ftp://ftp.ncbi.nlm.nih.gov/geo/samples/GSM1238nnn/GSM1238162/	GSM1238162	301238162
ovarian	Homo sapiens	serous	S3	3	GPL7264	GSE51088	ftp://ftp.ncbi.nlm.nih.gov/geo/samples/GSM1238nnn/GSM1238159/	GSM1238159	301238159
ovarian	Homo sapiens	serous	S3	3	GPL7264	GSE51088	ftp://ftp.ncbi.nlm.nih.gov/geo/samples/GSM1238nnn/GSM1238158/	GSM1238158	301238158
ovarian	Homo sapiens	serous	S3	3	GPL7264	GSE51088	ftp://ftp.ncbi.nlm.nih.gov/geo/samples/GSM1238nnn/GSM1238156/	GSM1238156	301238156
ovarian	Homo sapiens	serous	S3	3	GPL7264	GSE51088	ftp://ftp.ncbi.nlm.nih.gov/geo/samples/GSM1238nnn/GSM1238153/	GSM1238153	301238153
ovarian	Homo sapiens	serous	S3	3	GPL7264	GSE51088	ftp://ftp.ncbi.nlm.nih.gov/geo/samples/GSM1238nnn/GSM1238148/	GSM1238148	301238148
ovarian	Homo sapiens	serous	S3	3	GPL7264	GSE51088	ftp://ftp.ncbi.nlm.nih.gov/geo/samples/GSM1238nnn/GSM1238147/	GSM1238147	301238147
ovarian	Homo sapiens	serous	S3	3	GPL7264	GSE51088	ftp://ftp.ncbi.nlm.nih.gov/geo/samples/GSM1238nnn/GSM1238146/	GSM1238146	301238146
ovarian	Homo sapiens	serous	S3	3	GPL96	GSE6008	ftp://ftp.ncbi.nlm.nih.gov/geo/samples/GSM139nnn/GSM139474/	GSM139474	300139474
ovarian	Homo sapiens	serous	S3	3	GPL96	GSE6008	ftp://ftp.ncbi.nlm.nih.gov/geo/samples/GSM139nnn/GSM139459/	GSM139459	300139459
ovarian	Homo sapiens	serous	S3	3	GPL96	GSE6008	ftp://ftp.ncbi.nlm.nih.gov/geo/samples/GSM139nnn/GSM139456/	GSM139456	300139456
ovarian	Homo sapiens	serous	S3	3	GPL96	GSE14764	ftp://ftp.ncbi.nlm.nih.gov/geo/samples/GSM368nnn/GSM368740/	GSM368740	300368740
ovarian	Homo sapiens	serous	S3	3	GPL96	GSE14764	ftp://ftp.ncbi.nlm.nih.gov/geo/samples/GSM368nnn/GSM368739/	GSM368739	300368739
ovarian	Homo sapiens	serous	S3	3	GPL96	GSE14764	ftp://ftp.ncbi.nlm.nih.gov/geo/samples/GSM368nnn/GSM368738/	GSM368738	300368738
ovarian	Homo sapiens	serous	S3	3	GPL96	GSE14764	ftp://ftp.ncbi.nlm.nih.gov/geo/samples/GSM368nnn/GSM368737/	GSM368737	300368737
ovarian	Homo sapiens	serous	S3	3	GPL96	GSE14764	ftp://ftp.ncbi.nlm.nih.gov/geo/samples/GSM368nnn/GSM368736/	GSM368736	300368736
ovarian	Homo sapiens	serous	S3	3	GPL96	GSE14764	ftp://ftp.ncbi.nlm.nih.gov/geo/samples/GSM368nnn/GSM368735/	GSM368735	300368735
ovarian	Homo sapiens	serous	S3	3	GPL96	GSE14764	ftp://ftp.ncbi.nlm.nih.gov/geo/samples/GSM368nnn/GSM368734/	GSM368734	300368734
ovarian	Homo sapiens	serous	S3	3	GPL96	GSE14764	ftp://ftp.ncbi.nlm.nih.gov/geo/samples/GSM368nnn/GSM368733/	GSM368733	300368733
ovarian	Homo sapiens	serous	S3	3	GPL96	GSE14764	ftp://ftp.ncbi.nlm.nih.gov/geo/samples/GSM368nnn/GSM368732/	GSM368732	300368732
ovarian	Homo sapiens	serous	S3	3	GPL96	GSE14764	ftp://ftp.ncbi.nlm.nih.gov/geo/samples/GSM368nnn/GSM368731/	GSM368731	300368731
ovarian	Homo sapiens	serous	S3	3	GPL96	GSE14764	ftp://ftp.ncbi.nlm.nih.gov/geo/samples/GSM368nnn/GSM368730/	GSM368730	300368730
ovarian	Homo sapiens	serous	S3	3	GPL96	GSE14764	ftp://ftp.ncbi.nlm.nih.gov/geo/samples/GSM368nnn/GSM368729/	GSM368729	300368729
ovarian	Homo sapiens	serous	S3	3	GPL96	GSE14764	ftp://ftp.ncbi.nlm.nih.gov/geo/samples/GSM368nnn/GSM368728/	GSM368728	300368728
ovarian	Homo sapiens	serous	S3	3	GPL96	GSE14764	ftp://ftp.ncbi.nlm.nih.gov/geo/samples/GSM368nnn/GSM368727/	GSM368727	300368727
ovarian	Homo sapiens	serous	S3	3	GPL96	GSE14764	ftp://ftp.ncbi.nlm.nih.gov/geo/samples/GSM368nnn/GSM368726/	GSM368726	300368726
ovarian	Homo sapiens	serous	S3	3	GPL96	GSE14764	ftp://ftp.ncbi.nlm.nih.gov/geo/samples/GSM368nnn/GSM368725/	GSM368725	300368725
ovarian	Homo sapiens	serous	S3	3	GPL96	GSE14764	ftp://ftp.ncbi.nlm.nih.gov/geo/samples/GSM368nnn/GSM368724/	GSM368724	300368724
ovarian	Homo sapiens	serous	S3	3	GPL96	GSE14764	ftp://ftp.ncbi.nlm.nih.gov/geo/samples/GSM368nnn/GSM368723/	GSM368723	300368723
ovarian	Homo sapiens	serous	S3	3	GPL96	GSE14764	ftp://ftp.ncbi.nlm.nih.gov/geo/samples/GSM368nnn/GSM368722/	GSM368722	300368722
ovarian	Homo sapiens	serous	S3	3	GPL96	GSE14764	ftp://ftp.ncbi.nlm.nih.gov/geo/samples/GSM368nnn/GSM368721/	GSM368721	300368721
ovarian	Homo sapiens	serous	S3	3	GPL96	GSE14764	ftp://ftp.ncbi.nlm.nih.gov/geo/samples/GSM368nnn/GSM368717/	GSM368717	300368717
ovarian	Homo sapiens	serous	S3	3	GPL96	GSE14764	ftp://ftp.ncbi.nlm.nih.gov/geo/samples/GSM368nnn/GSM368716/	GSM368716	300368716
ovarian	Homo sapiens	serous	S3	3	GPL96	GSE14764	ftp://ftp.ncbi.nlm.nih.gov/geo/samples/GSM368nnn/GSM368715/	GSM368715	300368715
ovarian	Homo sapiens	serous	S3	3	GPL96	GSE14764	ftp://ftp.ncbi.nlm.nih.gov/geo/samples/GSM368nnn/GSM368714/	GSM368714	300368714
ovarian	Homo sapiens	serous	S3	3	GPL96	GSE14764	ftp://ftp.ncbi.nlm.nih.gov/geo/samples/GSM368nnn/GSM368713/	GSM368713	300368713
ovarian	Homo sapiens	serous	S3	3	GPL96	GSE14764	ftp://ftp.ncbi.nlm.nih.gov/geo/samples/GSM368nnn/GSM368711/	GSM368711	300368711
ovarian	Homo sapiens	serous	S3	3	GPL96	GSE14764	ftp://ftp.ncbi.nlm.nih.gov/geo/samples/GSM368nnn/GSM368710/	GSM368710	300368710
ovarian	Homo sapiens	serous	S3	3	GPL96	GSE14764	ftp://ftp.ncbi.nlm.nih.gov/geo/samples/GSM368nnn/GSM368709/	GSM368709	300368709
ovarian	Homo sapiens	serous	S3	3	GPL96	GSE14764	ftp://ftp.ncbi.nlm.nih.gov/geo/samples/GSM368nnn/GSM368708/	GSM368708	300368708
ovarian	Homo sapiens	serous	S3	3	GPL96	GSE14764	ftp://ftp.ncbi.nlm.nih.gov/geo/samples/GSM368nnn/GSM368707/	GSM368707	300368707
ovarian	Homo sapiens	serous	S3	3	GPL96	GSE14764	ftp://ftp.ncbi.nlm.nih.gov/geo/samples/GSM368nnn/GSM368706/	GSM368706	300368706
ovarian	Homo sapiens	serous	S3	3	GPL96	GSE14764	ftp://ftp.ncbi.nlm.nih.gov/geo/samples/GSM368nnn/GSM368705/	GSM368705	300368705
ovarian	Homo sapiens	serous	S3	3	GPL96	GSE14764	ftp://ftp.ncbi.nlm.nih.gov/geo/samples/GSM368nnn/GSM368696/	GSM368696	300368696
ovarian	Homo sapiens	serous	S3	3	GPL96	GSE14764	ftp://ftp.ncbi.nlm.nih.gov/geo/samples/GSM368nnn/GSM368694/	GSM368694	300368694
ovarian	Homo sapiens	serous	S3	3	GPL96	GSE14764	ftp://ftp.ncbi.nlm.nih.gov/geo/samples/GSM368nnn/GSM368693/	GSM368693	300368693
ovarian	Homo sapiens	serous	S3	3	GPL96	GSE6008	ftp://ftp.ncbi.nlm.nih.gov/geo/samples/GSM139nnn/GSM139475/	GSM139475	300139475
ovarian	Homo sapiens	serous	S3	3	GPL96	GSE6008	ftp://ftp.ncbi.nlm.nih.gov/geo/samples/GSM139nnn/GSM139473/	GSM139473	300139473
ovarian	Homo sapiens	serous	S3	3	GPL96	GSE6008	ftp://ftp.ncbi.nlm.nih.gov/geo/samples/GSM139nnn/GSM139472/	GSM139472	300139472
ovarian	Homo sapiens	serous	S3	3	GPL96	GSE6008	ftp://ftp.ncbi.nlm.nih.gov/geo/samples/GSM139nnn/GSM139471/	GSM139471	300139471
ovarian	Homo sapiens	serous	S3	3	GPL96	GSE6008	ftp://ftp.ncbi.nlm.nih.gov/geo/samples/GSM139nnn/GSM139470/	GSM139470	300139470
ovarian	Homo sapiens	serous	S3	3	GPL96	GSE6008	ftp://ftp.ncbi.nlm.nih.gov/geo/samples/GSM139nnn/GSM139469/	GSM139469	300139469
ovarian	Homo sapiens	serous	S3	3	GPL96	GSE6008	ftp://ftp.ncbi.nlm.nih.gov/geo/samples/GSM139nnn/GSM139467/	GSM139467	300139467
ovarian	Homo sapiens	serous	S3	3	GPL96	GSE6008	ftp://ftp.ncbi.nlm.nih.gov/geo/samples/GSM139nnn/GSM139466/	GSM139466	300139466
ovarian	Homo sapiens	serous	S3	3	GPL96	GSE6008	ftp://ftp.ncbi.nlm.nih.gov/geo/samples/GSM139nnn/GSM139463/	GSM139463	300139463
ovarian	Homo sapiens	serous	S3	3	GPL96	GSE6008	ftp://ftp.ncbi.nlm.nih.gov/geo/samples/GSM139nnn/GSM139462/	GSM139462	300139462
ovarian	Homo sapiens	serous	S3	3	GPL96	GSE6008	ftp://ftp.ncbi.nlm.nih.gov/geo/samples/GSM139nnn/GSM139461/	GSM139461	300139461
ovarian	Homo sapiens	serous	S3	3	GPL96	GSE6008	ftp://ftp.ncbi.nlm.nih.gov/geo/samples/GSM139nnn/GSM139460/	GSM139460	300139460
ovarian	Homo sapiens	serous	S3	3	GPL96	GSE6008	ftp://ftp.ncbi.nlm.nih.gov/geo/samples/GSM139nnn/GSM139454/	GSM139454	300139454
ovarian	Homo sapiens	serous	S3	3	GPL96	GSE6008	ftp://ftp.ncbi.nlm.nih.gov/geo/samples/GSM139nnn/GSM139453/	GSM139453	300139453
ovarian	Homo sapiens	serous	S3	3	GPL96	GSE6008	ftp://ftp.ncbi.nlm.nih.gov/geo/samples/GSM139nnn/GSM139452/	GSM139452	300139452
ovarian	Homo sapiens	serous	S3	3	GPL96	GSE6008	ftp://ftp.ncbi.nlm.nih.gov/geo/samples/GSM139nnn/GSM139451/	GSM139451	300139451
ovarian	Homo sapiens	serous	S3	3	GPL96	GSE6008	ftp://ftp.ncbi.nlm.nih.gov/geo/samples/GSM139nnn/GSM139450/	GSM139450	300139450
ovarian	Homo sapiens	serous	S3	3	GPL96	GSE6008	ftp://ftp.ncbi.nlm.nih.gov/geo/samples/GSM139nnn/GSM139449/	GSM139449	300139449
ovarian	Homo sapiens	serous	S3	3	GPL96	GSE6008	ftp://ftp.ncbi.nlm.nih.gov/geo/samples/GSM139nnn/GSM139443/	GSM139443	300139443
ovarian	Homo sapiens	serous	S3	3	GPL96	GSE6008	ftp://ftp.ncbi.nlm.nih.gov/geo/samples/GSM139nnn/GSM139442/	GSM139442	300139442
ovarian	Homo sapiens	serous	S3	3	GPL96	GSE6008	ftp://ftp.ncbi.nlm.nih.gov/geo/samples/GSM139nnn/GSM139441/	GSM139441	300139441
ovarian	Homo sapiens	serous	S3	3	GPL96	GSE6008	ftp://ftp.ncbi.nlm.nih.gov/geo/samples/GSM139nnn/GSM139440/	GSM139440	300139440
ovarian	Homo sapiens	serous	S3	3	GPL96	GSE6008	ftp://ftp.ncbi.nlm.nih.gov/geo/samples/GSM139nnn/GSM139439/	GSM139439	300139439
ovarian	Homo sapiens	serous	S3	3	GPL96	GSE6008	ftp://ftp.ncbi.nlm.nih.gov/geo/samples/GSM139nnn/GSM139438/	GSM139438	300139438
ovarian	Homo sapiens	serous	S3	3	GPL96	GSE6008	ftp://ftp.ncbi.nlm.nih.gov/geo/samples/GSM139nnn/GSM139437/	GSM139437	300139437
ovarian	Homo sapiens	serous	S3	3	GPL96	GSE6008	ftp://ftp.ncbi.nlm.nih.gov/geo/samples/GSM139nnn/GSM139435/	GSM139435	300139435
ovarian	Homo sapiens	serous	S3	3	GPL96	GSE14764	ftp://ftp.ncbi.nlm.nih.gov/geo/samples/GSM368nnn/GSM368704/	GSM368704	300368704
ovarian	Homo sapiens	serous	S3	3	GPL96	GSE14764	ftp://ftp.ncbi.nlm.nih.gov/geo/samples/GSM368nnn/GSM368703/	GSM368703	300368703
ovarian	Homo sapiens	serous	S3	3	GPL96	GSE14764	ftp://ftp.ncbi.nlm.nih.gov/geo/samples/GSM368nnn/GSM368701/	GSM368701	300368701
ovarian	Homo sapiens	serous	S3	3	GPL96	GSE14764	ftp://ftp.ncbi.nlm.nih.gov/geo/samples/GSM368nnn/GSM368700/	GSM368700	300368700
ovarian	Homo sapiens	serous	S3	3	GPL96	GSE14764	ftp://ftp.ncbi.nlm.nih.gov/geo/samples/GSM368nnn/GSM368699/	GSM368699	300368699
ovarian	Homo sapiens	serous	S3	3	GPL96	GSE14764	ftp://ftp.ncbi.nlm.nih.gov/geo/samples/GSM368nnn/GSM368698/	GSM368698	300368698
ovarian	Homo sapiens	serous	S3	3	GPL96	GSE14764	ftp://ftp.ncbi.nlm.nih.gov/geo/samples/GSM368nnn/GSM368697/	GSM368697	300368697
ovarian	Homo sapiens	serous	S3	3	GPL96	GSE14764	ftp://ftp.ncbi.nlm.nih.gov/geo/samples/GSM368nnn/GSM368695/	GSM368695	300368695
ovarian	Homo sapiens	serous	S3	3	GPL96	GSE14764	ftp://ftp.ncbi.nlm.nih.gov/geo/samples/GSM368nnn/GSM368692/	GSM368692	300368692
ovarian	Homo sapiens	serous	S3	3	GPL96	GSE14764	ftp://ftp.ncbi.nlm.nih.gov/geo/samples/GSM368nnn/GSM368691/	GSM368691	300368691
ovarian	Homo sapiens	serous	S3	3	GPL96	GSE14764	ftp://ftp.ncbi.nlm.nih.gov/geo/samples/GSM368nnn/GSM368690/	GSM368690	300368690
ovarian	Homo sapiens	serous	S3	3	GPL96	GSE14764	ftp://ftp.ncbi.nlm.nih.gov/geo/samples/GSM368nnn/GSM368689/	GSM368689	300368689
ovarian	Homo sapiens	serous	S3	3	GPL96	GSE14764	ftp://ftp.ncbi.nlm.nih.gov/geo/samples/GSM368nnn/GSM368685/	GSM368685	300368685
ovarian	Homo sapiens	serous	S3	3	GPL96	GSE14764	ftp://ftp.ncbi.nlm.nih.gov/geo/samples/GSM368nnn/GSM368683/	GSM368683	300368683
ovarian	Homo sapiens	serous	S3	3	GPL96	GSE14764	ftp://ftp.ncbi.nlm.nih.gov/geo/samples/GSM368nnn/GSM368681/	GSM368681	300368681
ovarian	Homo sapiens	serous	S3	3	GPL96	GSE14764	ftp://ftp.ncbi.nlm.nih.gov/geo/samples/GSM368nnn/GSM368680/	GSM368680	300368680
ovarian	Homo sapiens	serous	S3	3	GPL96	GSE14764	ftp://ftp.ncbi.nlm.nih.gov/geo/samples/GSM368nnn/GSM368679/	GSM368679	300368679
ovarian	Homo sapiens	serous	S3	3	GPL96	GSE14764	ftp://ftp.ncbi.nlm.nih.gov/geo/samples/GSM368nnn/GSM368678/	GSM368678	300368678
ovarian	Homo sapiens	serous	S3	3	GPL96	GSE14764	ftp://ftp.ncbi.nlm.nih.gov/geo/samples/GSM368nnn/GSM368675/	GSM368675	300368675
ovarian	Homo sapiens	serous	S3	3	GPL96	GSE14764	ftp://ftp.ncbi.nlm.nih.gov/geo/samples/GSM368nnn/GSM368674/	GSM368674	300368674
ovarian	Homo sapiens	serous	S3	3	GPL96	GSE14764	ftp://ftp.ncbi.nlm.nih.gov/geo/samples/GSM368nnn/GSM368673/	GSM368673	300368673
ovarian	Homo sapiens	serous	S3	3	GPL96	GSE14764	ftp://ftp.ncbi.nlm.nih.gov/geo/samples/GSM368nnn/GSM368671/	GSM368671	300368671
ovarian	Homo sapiens	serous	S3	3	GPL96	GSE14764	ftp://ftp.ncbi.nlm.nih.gov/geo/samples/GSM368nnn/GSM368670/	GSM368670	300368670
ovarian	Homo sapiens	serous	S3	3	GPL96	GSE14764	ftp://ftp.ncbi.nlm.nih.gov/geo/samples/GSM368nnn/GSM368668/	GSM368668	300368668
ovarian	Homo sapiens	serous	S3	3	GPL96	GSE14764	ftp://ftp.ncbi.nlm.nih.gov/geo/samples/GSM368nnn/GSM368666/	GSM368666	300368666
ovarian	Homo sapiens	serous	S3	3	GPL96	GSE14764	ftp://ftp.ncbi.nlm.nih.gov/geo/samples/GSM368nnn/GSM368665/	GSM368665	300368665
ovarian	Homo sapiens	serous	S3	3	GPL96	GSE14764	ftp://ftp.ncbi.nlm.nih.gov/geo/samples/GSM368nnn/GSM368664/	GSM368664	300368664
ovarian	Homo sapiens	serous	S3	3	GPL96	GSE14764	ftp://ftp.ncbi.nlm.nih.gov/geo/samples/GSM368nnn/GSM368662/	GSM368662	300368662
ovarian	Homo sapiens	serous	S3	3	GPL96	GSE6008	ftp://ftp.ncbi.nlm.nih.gov/geo/samples/GSM139nnn/GSM139448/	GSM139448	300139448
ovarian	Homo sapiens	serous	S4	4	GPL570	GSE23391 GSE23392	ftp://ftp.ncbi.nlm.nih.gov/geo/samples/GSM573nnn/GSM573678/	GSM573678	300573678
ovarian	Homo sapiens	serous	S4	4	GPL570	GSE63885	ftp://ftp.ncbi.nlm.nih.gov/geo/samples/GSM1559nnn/GSM1559377/	GSM1559377	301559377
ovarian	Homo sapiens	serous	S4	4	GPL570	GSE63885	ftp://ftp.ncbi.nlm.nih.gov/geo/samples/GSM1559nnn/GSM1559341/	GSM1559341	301559341
ovarian	Homo sapiens	serous	S4	4	GPL570	GSE63885	ftp://ftp.ncbi.nlm.nih.gov/geo/samples/GSM1559nnn/GSM1559338/	GSM1559338	301559338
ovarian	Homo sapiens	serous	S4	4	GPL570	GSE63885	ftp://ftp.ncbi.nlm.nih.gov/geo/samples/GSM1559nnn/GSM1559337/	GSM1559337	301559337
ovarian	Homo sapiens	serous	S4	4	GPL570	GSE63885	ftp://ftp.ncbi.nlm.nih.gov/geo/samples/GSM1559nnn/GSM1559334/	GSM1559334	301559334
ovarian	Homo sapiens	serous	S4	4	GPL570	GSE63885	ftp://ftp.ncbi.nlm.nih.gov/geo/samples/GSM1559nnn/GSM1559331/	GSM1559331	301559331
ovarian	Homo sapiens	serous	S4	4	GPL570	GSE63885	ftp://ftp.ncbi.nlm.nih.gov/geo/samples/GSM1559nnn/GSM1559320/	GSM1559320	301559320
ovarian	Homo sapiens	serous	S4	4	GPL570	GSE63885	ftp://ftp.ncbi.nlm.nih.gov/geo/samples/GSM1559nnn/GSM1559317/	GSM1559317	301559317
ovarian	Homo sapiens	serous	S4	4	GPL570	GSE63885	ftp://ftp.ncbi.nlm.nih.gov/geo/samples/GSM1559nnn/GSM1559306/	GSM1559306	301559306
ovarian	Homo sapiens	serous	S4	4	GPL570	GSE63885	ftp://ftp.ncbi.nlm.nih.gov/geo/samples/GSM1559nnn/GSM1559301/	GSM1559301	301559301
ovarian	Homo sapiens	serous	S4	4	GPL570	GSE20565	ftp://ftp.ncbi.nlm.nih.gov/geo/samples/GSM516nnn/GSM516808/	GSM516808	300516808
ovarian	Homo sapiens	serous	S4	4	GPL570	GSE20565	ftp://ftp.ncbi.nlm.nih.gov/geo/samples/GSM516nnn/GSM516804/	GSM516804	300516804
ovarian	Homo sapiens	serous	S4	4	GPL570	GSE20565	ftp://ftp.ncbi.nlm.nih.gov/geo/samples/GSM516nnn/GSM516801/	GSM516801	300516801
ovarian	Homo sapiens	serous	S4	4	GPL570	GSE20565	ftp://ftp.ncbi.nlm.nih.gov/geo/samples/GSM516nnn/GSM516799/	GSM516799	300516799
ovarian	Homo sapiens	serous	S4	4	GPL570	GSE20565	ftp://ftp.ncbi.nlm.nih.gov/geo/samples/GSM516nnn/GSM516779/	GSM516779	300516779
ovarian	Homo sapiens	serous	S4	4	GPL570	GSE20565	ftp://ftp.ncbi.nlm.nih.gov/geo/samples/GSM516nnn/GSM516770/	GSM516770	300516770
ovarian	Homo sapiens	serous	S4	4	GPL570	GSE20565	ftp://ftp.ncbi.nlm.nih.gov/geo/samples/GSM516nnn/GSM516726/	GSM516726	300516726
ovarian	Homo sapiens	serous	S4	4	GPL570	GSE20565	ftp://ftp.ncbi.nlm.nih.gov/geo/samples/GSM516nnn/GSM516700/	GSM516700	300516700
ovarian	Homo sapiens	serous	S4	4	GPL570	GSE20565	ftp://ftp.ncbi.nlm.nih.gov/geo/samples/GSM516nnn/GSM516699/	GSM516699	300516699
ovarian	Homo sapiens	serous	S4	4	GPL570	GSE20565	ftp://ftp.ncbi.nlm.nih.gov/geo/samples/GSM516nnn/GSM516698/	GSM516698	300516698
ovarian	Homo sapiens	serous	S4	4	GPL570	GSE20565	ftp://ftp.ncbi.nlm.nih.gov/geo/samples/GSM516nnn/GSM516691/	GSM516691	300516691
ovarian	Homo sapiens	serous	S4	4	GPL570	GSE20565	ftp://ftp.ncbi.nlm.nih.gov/geo/samples/GSM516nnn/GSM516681/	GSM516681	300516681
ovarian	Homo sapiens	serous	S4	4	GPL570	GSE12172	ftp://ftp.ncbi.nlm.nih.gov/geo/samples/GSM306nnn/GSM306221/	GSM306221	300306221
ovarian	Homo sapiens	serous	S4	4	GPL570	GSE12172	ftp://ftp.ncbi.nlm.nih.gov/geo/samples/GSM306nnn/GSM306214/	GSM306214	300306214
ovarian	Homo sapiens	serous	S4	4	GPL570	GSE12172	ftp://ftp.ncbi.nlm.nih.gov/geo/samples/GSM306nnn/GSM306212/	GSM306212	300306212
ovarian	Homo sapiens	serous	S4	4	GPL570	GSE12172	ftp://ftp.ncbi.nlm.nih.gov/geo/samples/GSM306nnn/GSM306211/	GSM306211	300306211
ovarian	Homo sapiens	serous	S4	4	GPL570	GSE12172	ftp://ftp.ncbi.nlm.nih.gov/geo/samples/GSM306nnn/GSM306204/	GSM306204	300306204
ovarian	Homo sapiens	serous	S4	4	GPL570	GSE12172	ftp://ftp.ncbi.nlm.nih.gov/geo/samples/GSM306nnn/GSM306169/	GSM306169	300306169
ovarian	Homo sapiens	serous	S4	4	GPL570	GSE12172	ftp://ftp.ncbi.nlm.nih.gov/geo/samples/GSM306nnn/GSM306160/	GSM306160	300306160
ovarian	Homo sapiens	serous	S4	4	GPL570	GSE12172	ftp://ftp.ncbi.nlm.nih.gov/geo/samples/GSM306nnn/GSM306159/	GSM306159	300306159
ovarian	Homo sapiens	serous	S4	4	GPL570	GSE12172	ftp://ftp.ncbi.nlm.nih.gov/geo/samples/GSM306nnn/GSM306158/	GSM306158	300306158
ovarian	Homo sapiens	serous	S4	4	GPL570	GSE26193	ftp://ftp.ncbi.nlm.nih.gov/geo/samples/GSM643nnn/GSM643035/	GSM643035	300643035
ovarian	Homo sapiens	serous	S4	4	GPL570	GSE26193	ftp://ftp.ncbi.nlm.nih.gov/geo/samples/GSM643nnn/GSM643028/	GSM643028	300643028
ovarian	Homo sapiens	serous	S4	4	GPL570	GSE26193	ftp://ftp.ncbi.nlm.nih.gov/geo/samples/GSM643nnn/GSM643011/	GSM643011	300643011
ovarian	Homo sapiens	serous	S4	4	GPL570	GSE26193	ftp://ftp.ncbi.nlm.nih.gov/geo/samples/GSM643nnn/GSM643006/	GSM643006	300643006
ovarian	Homo sapiens	serous	S4	4	GPL570	GSE26193	ftp://ftp.ncbi.nlm.nih.gov/geo/samples/GSM642nnn/GSM642974/	GSM642974	300642974
ovarian	Homo sapiens	serous	S4	4	GPL570	GSE26193	ftp://ftp.ncbi.nlm.nih.gov/geo/samples/GSM642nnn/GSM642969/	GSM642969	300642969
ovarian	Homo sapiens	serous	S4	4	GPL570	GSE26193	ftp://ftp.ncbi.nlm.nih.gov/geo/samples/GSM642nnn/GSM642951/	GSM642951	300642951
ovarian	Homo sapiens	serous	S4	4	GPL570	GSE26193	ftp://ftp.ncbi.nlm.nih.gov/geo/samples/GSM642nnn/GSM642949/	GSM642949	300642949
ovarian	Homo sapiens	serous	S4	4	GPL570	GSE26193	ftp://ftp.ncbi.nlm.nih.gov/geo/samples/GSM642nnn/GSM642948/	GSM642948	300642948
ovarian	Homo sapiens	serous	S4	4	GPL570	GSE26193	ftp://ftp.ncbi.nlm.nih.gov/geo/samples/GSM642nnn/GSM642947/	GSM642947	300642947
ovarian	Homo sapiens	serous	S4	4	GPL570	GSE26193	ftp://ftp.ncbi.nlm.nih.gov/geo/samples/GSM642nnn/GSM642944/	GSM642944	300642944
ovarian	Homo sapiens	serous	S4	4	GPL570	GSE26193	ftp://ftp.ncbi.nlm.nih.gov/geo/samples/GSM642nnn/GSM642936/	GSM642936	300642936
ovarian	Homo sapiens	serous	S4	4	GPL570	GSE44104	ftp://ftp.ncbi.nlm.nih.gov/geo/samples/GSM1079nnn/GSM1079030/	GSM1079030	301079030
ovarian	Homo sapiens	serous	S4	4	GPL570	GSE44104	ftp://ftp.ncbi.nlm.nih.gov/geo/samples/GSM1079nnn/GSM1079026/	GSM1079026	301079026
ovarian	Homo sapiens	serous	S4	4	GPL570	GSE30161	ftp://ftp.ncbi.nlm.nih.gov/geo/samples/GSM746nnn/GSM746908/	GSM746908	300746908
ovarian	Homo sapiens	serous	S4	4	GPL570	GSE30161	ftp://ftp.ncbi.nlm.nih.gov/geo/samples/GSM746nnn/GSM746895/	GSM746895	300746895
ovarian	Homo sapiens	serous	S4	4	GPL570	GSE30161	ftp://ftp.ncbi.nlm.nih.gov/geo/samples/GSM746nnn/GSM746877/	GSM746877	300746877
ovarian	Homo sapiens	serous	S4	4	GPL570	GSE30161	ftp://ftp.ncbi.nlm.nih.gov/geo/samples/GSM746nnn/GSM746861/	GSM746861	300746861
ovarian	Homo sapiens	serous	S4	4	GPL6480	GSE17260	ftp://ftp.ncbi.nlm.nih.gov/geo/samples/GSM432nnn/GSM432330/	GSM432330	300432330
ovarian	Homo sapiens	serous	S4	4	GPL6480	GSE17260	ftp://ftp.ncbi.nlm.nih.gov/geo/samples/GSM432nnn/GSM432328/	GSM432328	300432328
ovarian	Homo sapiens	serous	S4	4	GPL6480	GSE17260	ftp://ftp.ncbi.nlm.nih.gov/geo/samples/GSM432nnn/GSM432326/	GSM432326	300432326
ovarian	Homo sapiens	serous	S4	4	GPL6480	GSE17260	ftp://ftp.ncbi.nlm.nih.gov/geo/samples/GSM432nnn/GSM432323/	GSM432323	300432323
ovarian	Homo sapiens	serous	S4	4	GPL6480	GSE17260	ftp://ftp.ncbi.nlm.nih.gov/geo/samples/GSM432nnn/GSM432322/	GSM432322	300432322
ovarian	Homo sapiens	serous	S4	4	GPL6480	GSE17260	ftp://ftp.ncbi.nlm.nih.gov/geo/samples/GSM432nnn/GSM432320/	GSM432320	300432320
ovarian	Homo sapiens	serous	S4	4	GPL6480	GSE17260	ftp://ftp.ncbi.nlm.nih.gov/geo/samples/GSM432nnn/GSM432307/	GSM432307	300432307
ovarian	Homo sapiens	serous	S4	4	GPL6480	GSE17260	ftp://ftp.ncbi.nlm.nih.gov/geo/samples/GSM432nnn/GSM432300/	GSM432300	300432300
ovarian	Homo sapiens	serous	S4	4	GPL6480	GSE17260	ftp://ftp.ncbi.nlm.nih.gov/geo/samples/GSM432nnn/GSM432299/	GSM432299	300432299
ovarian	Homo sapiens	serous	S4	4	GPL6480	GSE17260	ftp://ftp.ncbi.nlm.nih.gov/geo/samples/GSM432nnn/GSM432287/	GSM432287	300432287
ovarian	Homo sapiens	serous	S4	4	GPL6480	GSE17260	ftp://ftp.ncbi.nlm.nih.gov/geo/samples/GSM432nnn/GSM432273/	GSM432273	300432273
ovarian	Homo sapiens	serous	S4	4	GPL6480	GSE17260	ftp://ftp.ncbi.nlm.nih.gov/geo/samples/GSM432nnn/GSM432272/	GSM432272	300432272
ovarian	Homo sapiens	serous	S4	4	GPL6480	GSE17260	ftp://ftp.ncbi.nlm.nih.gov/geo/samples/GSM432nnn/GSM432271/	GSM432271	300432271
ovarian	Homo sapiens	serous	S4	4	GPL6480	GSE17260	ftp://ftp.ncbi.nlm.nih.gov/geo/samples/GSM432nnn/GSM432254/	GSM432254	300432254
ovarian	Homo sapiens	serous	S4	4	GPL6480	GSE17260	ftp://ftp.ncbi.nlm.nih.gov/geo/samples/GSM432nnn/GSM432252/	GSM432252	300432252
ovarian	Homo sapiens	serous	S4	4	GPL6480	GSE17260	ftp://ftp.ncbi.nlm.nih.gov/geo/samples/GSM432nnn/GSM432239/	GSM432239	300432239
ovarian	Homo sapiens	serous	S4	4	GPL6480	GSE17260	ftp://ftp.ncbi.nlm.nih.gov/geo/samples/GSM432nnn/GSM432221/	GSM432221	300432221
ovarian	Homo sapiens	serous	S4	4	GPL6480	GSE53963	ftp://ftp.ncbi.nlm.nih.gov/geo/samples/GSM1304nnn/GSM1304419/	GSM1304419	301304419
ovarian	Homo sapiens	serous	S4	4	GPL6480	GSE53963	ftp://ftp.ncbi.nlm.nih.gov/geo/samples/GSM1304nnn/GSM1304414/	GSM1304414	301304414
ovarian	Homo sapiens	serous	S4	4	GPL6480	GSE53963	ftp://ftp.ncbi.nlm.nih.gov/geo/samples/GSM1304nnn/GSM1304409/	GSM1304409	301304409
ovarian	Homo sapiens	serous	S4	4	GPL6480	GSE53963	ftp://ftp.ncbi.nlm.nih.gov/geo/samples/GSM1304nnn/GSM1304407/	GSM1304407	301304407
ovarian	Homo sapiens	serous	S4	4	GPL6480	GSE53963	ftp://ftp.ncbi.nlm.nih.gov/geo/samples/GSM1304nnn/GSM1304406/	GSM1304406	301304406
ovarian	Homo sapiens	serous	S4	4	GPL6480	GSE53963	ftp://ftp.ncbi.nlm.nih.gov/geo/samples/GSM1304nnn/GSM1304404/	GSM1304404	301304404
ovarian	Homo sapiens	serous	S4	4	GPL6480	GSE53963	ftp://ftp.ncbi.nlm.nih.gov/geo/samples/GSM1304nnn/GSM1304397/	GSM1304397	301304397
ovarian	Homo sapiens	serous	S4	4	GPL6480	GSE53963	ftp://ftp.ncbi.nlm.nih.gov/geo/samples/GSM1304nnn/GSM1304393/	GSM1304393	301304393
ovarian	Homo sapiens	serous	S4	4	GPL6480	GSE53963	ftp://ftp.ncbi.nlm.nih.gov/geo/samples/GSM1304nnn/GSM1304392/	GSM1304392	301304392
ovarian	Homo sapiens	serous	S4	4	GPL6480	GSE53963	ftp://ftp.ncbi.nlm.nih.gov/geo/samples/GSM1304nnn/GSM1304391/	GSM1304391	301304391
ovarian	Homo sapiens	serous	S4	4	GPL6480	GSE53963	ftp://ftp.ncbi.nlm.nih.gov/geo/samples/GSM1304nnn/GSM1304389/	GSM1304389	301304389
ovarian	Homo sapiens	serous	S4	4	GPL6480	GSE53963	ftp://ftp.ncbi.nlm.nih.gov/geo/samples/GSM1304nnn/GSM1304384/	GSM1304384	301304384
ovarian	Homo sapiens	serous	S4	4	GPL6480	GSE53963	ftp://ftp.ncbi.nlm.nih.gov/geo/samples/GSM1304nnn/GSM1304381/	GSM1304381	301304381
ovarian	Homo sapiens	serous	S4	4	GPL6480	GSE53963	ftp://ftp.ncbi.nlm.nih.gov/geo/samples/GSM1304nnn/GSM1304370/	GSM1304370	301304370
ovarian	Homo sapiens	serous	S4	4	GPL6480	GSE53963	ftp://ftp.ncbi.nlm.nih.gov/geo/samples/GSM1304nnn/GSM1304367/	GSM1304367	301304367
ovarian	Homo sapiens	serous	S4	4	GPL6480	GSE53963	ftp://ftp.ncbi.nlm.nih.gov/geo/samples/GSM1304nnn/GSM1304360/	GSM1304360	301304360
ovarian	Homo sapiens	serous	S4	4	GPL6480	GSE53963	ftp://ftp.ncbi.nlm.nih.gov/geo/samples/GSM1304nnn/GSM1304356/	GSM1304356	301304356
ovarian	Homo sapiens	serous	S4	4	GPL6480	GSE53963	ftp://ftp.ncbi.nlm.nih.gov/geo/samples/GSM1304nnn/GSM1304355/	GSM1304355	301304355
ovarian	Homo sapiens	serous	S4	4	GPL6480	GSE53963	ftp://ftp.ncbi.nlm.nih.gov/geo/samples/GSM1304nnn/GSM1304354/	GSM1304354	301304354
ovarian	Homo sapiens	serous	S4	4	GPL6480	GSE53963	ftp://ftp.ncbi.nlm.nih.gov/geo/samples/GSM1304nnn/GSM1304353/	GSM1304353	301304353
ovarian	Homo sapiens	serous	S4	4	GPL6480	GSE53963	ftp://ftp.ncbi.nlm.nih.gov/geo/samples/GSM1304nnn/GSM1304350/	GSM1304350	301304350
ovarian	Homo sapiens	serous	S4	4	GPL6480	GSE53963	ftp://ftp.ncbi.nlm.nih.gov/geo/samples/GSM1304nnn/GSM1304347/	GSM1304347	301304347
ovarian	Homo sapiens	serous	S4	4	GPL6480	GSE53963	ftp://ftp.ncbi.nlm.nih.gov/geo/samples/GSM1304nnn/GSM1304343/	GSM1304343	301304343
ovarian	Homo sapiens	serous	S4	4	GPL6480	GSE53963	ftp://ftp.ncbi.nlm.nih.gov/geo/samples/GSM1304nnn/GSM1304323/	GSM1304323	301304323
ovarian	Homo sapiens	serous	S4	4	GPL6480	GSE53963	ftp://ftp.ncbi.nlm.nih.gov/geo/samples/GSM1304nnn/GSM1304321/	GSM1304321	301304321
ovarian	Homo sapiens	serous	S4	4	GPL6480	GSE53963	ftp://ftp.ncbi.nlm.nih.gov/geo/samples/GSM1304nnn/GSM1304320/	GSM1304320	301304320
ovarian	Homo sapiens	serous	S4	4	GPL6480	GSE53963	ftp://ftp.ncbi.nlm.nih.gov/geo/samples/GSM1304nnn/GSM1304318/	GSM1304318	301304318
ovarian	Homo sapiens	serous	S4	4	GPL6480	GSE53963	ftp://ftp.ncbi.nlm.nih.gov/geo/samples/GSM1304nnn/GSM1304312/	GSM1304312	301304312
ovarian	Homo sapiens	serous	S4	4	GPL6480	GSE53963	ftp://ftp.ncbi.nlm.nih.gov/geo/samples/GSM1304nnn/GSM1304305/	GSM1304305	301304305
ovarian	Homo sapiens	serous	S4	4	GPL6480	GSE53963	ftp://ftp.ncbi.nlm.nih.gov/geo/samples/GSM1304nnn/GSM1304303/	GSM1304303	301304303
ovarian	Homo sapiens	serous	S4	4	GPL6480	GSE53963	ftp://ftp.ncbi.nlm.nih.gov/geo/samples/GSM1304nnn/GSM1304302/	GSM1304302	301304302
ovarian	Homo sapiens	serous	S4	4	GPL6480	GSE53963	ftp://ftp.ncbi.nlm.nih.gov/geo/samples/GSM1304nnn/GSM1304298/	GSM1304298	301304298
ovarian	Homo sapiens	serous	S4	4	GPL6480	GSE53963	ftp://ftp.ncbi.nlm.nih.gov/geo/samples/GSM1304nnn/GSM1304297/	GSM1304297	301304297
ovarian	Homo sapiens	serous	S4	4	GPL6480	GSE53963	ftp://ftp.ncbi.nlm.nih.gov/geo/samples/GSM1304nnn/GSM1304281/	GSM1304281	301304281
ovarian	Homo sapiens	serous	S4	4	GPL6480	GSE53963	ftp://ftp.ncbi.nlm.nih.gov/geo/samples/GSM1304nnn/GSM1304273/	GSM1304273	301304273
ovarian	Homo sapiens	serous	S4	4	GPL6480	GSE53963	ftp://ftp.ncbi.nlm.nih.gov/geo/samples/GSM1304nnn/GSM1304270/	GSM1304270	301304270
ovarian	Homo sapiens	serous	S4	4	GPL6480	GSE53963	ftp://ftp.ncbi.nlm.nih.gov/geo/samples/GSM1304nnn/GSM1304269/	GSM1304269	301304269
ovarian	Homo sapiens	serous	S4	4	GPL6480	GSE53963	ftp://ftp.ncbi.nlm.nih.gov/geo/samples/GSM1304nnn/GSM1304266/	GSM1304266	301304266
ovarian	Homo sapiens	serous	S4	4	GPL6480	GSE53963	ftp://ftp.ncbi.nlm.nih.gov/geo/samples/GSM1304nnn/GSM1304263/	GSM1304263	301304263
ovarian	Homo sapiens	serous	S4	4	GPL6480	GSE53963	ftp://ftp.ncbi.nlm.nih.gov/geo/samples/GSM1304nnn/GSM1304251/	GSM1304251	301304251
ovarian	Homo sapiens	serous	S4	4	GPL6480	GSE53963	ftp://ftp.ncbi.nlm.nih.gov/geo/samples/GSM1304nnn/GSM1304248/	GSM1304248	301304248
ovarian	Homo sapiens	serous	S4	4	GPL7264	GSE51088	ftp://ftp.ncbi.nlm.nih.gov/geo/samples/GSM1238nnn/GSM1238316/	GSM1238316	301238316
ovarian	Homo sapiens	serous	S4	4	GPL7264	GSE51088	ftp://ftp.ncbi.nlm.nih.gov/geo/samples/GSM1238nnn/GSM1238300/	GSM1238300	301238300
ovarian	Homo sapiens	serous	S4	4	GPL7264	GSE51088	ftp://ftp.ncbi.nlm.nih.gov/geo/samples/GSM1238nnn/GSM1238296/	GSM1238296	301238296
ovarian	Homo sapiens	serous	S4	4	GPL7264	GSE51088	ftp://ftp.ncbi.nlm.nih.gov/geo/samples/GSM1238nnn/GSM1238294/	GSM1238294	301238294
ovarian	Homo sapiens	serous	S4	4	GPL7264	GSE51088	ftp://ftp.ncbi.nlm.nih.gov/geo/samples/GSM1238nnn/GSM1238281/	GSM1238281	301238281
ovarian	Homo sapiens	serous	S4	4	GPL7264	GSE51088	ftp://ftp.ncbi.nlm.nih.gov/geo/samples/GSM1238nnn/GSM1238262/	GSM1238262	301238262
ovarian	Homo sapiens	serous	S4	4	GPL7264	GSE51088	ftp://ftp.ncbi.nlm.nih.gov/geo/samples/GSM1238nnn/GSM1238227/	GSM1238227	301238227
ovarian	Homo sapiens	serous	S4	4	GPL7264	GSE51088	ftp://ftp.ncbi.nlm.nih.gov/geo/samples/GSM1238nnn/GSM1238222/	GSM1238222	301238222
ovarian	Homo sapiens	serous	S4	4	GPL7264	GSE51088	ftp://ftp.ncbi.nlm.nih.gov/geo/samples/GSM1238nnn/GSM1238209/	GSM1238209	301238209
ovarian	Homo sapiens	serous	S4	4	GPL7264	GSE51088	ftp://ftp.ncbi.nlm.nih.gov/geo/samples/GSM1238nnn/GSM1238206/	GSM1238206	301238206
ovarian	Homo sapiens	serous	S4	4	GPL7264	GSE51088	ftp://ftp.ncbi.nlm.nih.gov/geo/samples/GSM1238nnn/GSM1238199/	GSM1238199	301238199
ovarian	Homo sapiens	serous	S4	4	GPL7264	GSE51088	ftp://ftp.ncbi.nlm.nih.gov/geo/samples/GSM1238nnn/GSM1238196/	GSM1238196	301238196
ovarian	Homo sapiens	serous	S4	4	GPL7264	GSE51088	ftp://ftp.ncbi.nlm.nih.gov/geo/samples/GSM1238nnn/GSM1238175/	GSM1238175	301238175
ovarian	Homo sapiens	serous	S4	4	GPL7264	GSE51088	ftp://ftp.ncbi.nlm.nih.gov/geo/samples/GSM1238nnn/GSM1238171/	GSM1238171	301238171
ovarian	Homo sapiens	serous	S4	4	GPL7264	GSE51088	ftp://ftp.ncbi.nlm.nih.gov/geo/samples/GSM1238nnn/GSM1238169/	GSM1238169	301238169
ovarian	Homo sapiens	serous	S4	4	GPL7264	GSE51088	ftp://ftp.ncbi.nlm.nih.gov/geo/samples/GSM1238nnn/GSM1238161/	GSM1238161	301238161
ovarian	Homo sapiens	serous	S4	4	GPL7264	GSE51088	ftp://ftp.ncbi.nlm.nih.gov/geo/samples/GSM1238nnn/GSM1238154/	GSM1238154	301238154
ovarian	Homo sapiens	serous	S4	4	GPL96	GSE6008	ftp://ftp.ncbi.nlm.nih.gov/geo/samples/GSM139nnn/GSM139458/	GSM139458	300139458
ovarian	Homo sapiens	serous	S4	4	GPL96	GSE6008	ftp://ftp.ncbi.nlm.nih.gov/geo/samples/GSM139nnn/GSM139447/	GSM139447	300139447
ovarian	Homo sapiens	serous	S4	4	GPL96	GSE6008	ftp://ftp.ncbi.nlm.nih.gov/geo/samples/GSM139nnn/GSM139445/	GSM139445	300139445
ovarian	Homo sapiens	serous	S4	4	GPL96	GSE6008	ftp://ftp.ncbi.nlm.nih.gov/geo/samples/GSM139nnn/GSM139436/	GSM139436	300139436
ovarian	Homo sapiens	serous	S4	4	GPL96	GSE14764	ftp://ftp.ncbi.nlm.nih.gov/geo/samples/GSM368nnn/GSM368720/	GSM368720	300368720
ovarian	Homo sapiens	serous	S4	4	GPL96	GSE14764	ftp://ftp.ncbi.nlm.nih.gov/geo/samples/GSM368nnn/GSM368661/	GSM368661	300368661
ovarian	Homo sapiens	normal	N	NA	GPL570	GSE12034	ftp://ftp.ncbi.nlm.nih.gov/geo/samples/GSM304nnn/GSM304262/	GSM304262	300304262
ovarian	Homo sapiens	normal	N	NA	GPL570	GSE12034	ftp://ftp.ncbi.nlm.nih.gov/geo/samples/GSM304nnn/GSM304261/	GSM304261	300304261
ovarian	Homo sapiens	normal	N	NA	GPL570	GSE12034	ftp://ftp.ncbi.nlm.nih.gov/geo/samples/GSM304nnn/GSM304260/	GSM304260	300304260
ovarian	Homo sapiens	normal	N	NA	GPL570	GSE34526	ftp://ftp.ncbi.nlm.nih.gov/geo/samples/GSM850nnn/GSM850529/	GSM850529	300850529
ovarian	Homo sapiens	normal	N	NA	GPL570	GSE34527	ftp://ftp.ncbi.nlm.nih.gov/geo/samples/GSM850nnn/GSM850528/	GSM850528	300850528
ovarian	Homo sapiens	normal	N	NA	GPL570	GSE34528	ftp://ftp.ncbi.nlm.nih.gov/geo/samples/GSM850nnn/GSM850527/	GSM850527	300850527
ovarian	Homo sapiens	normal	N	NA	GPL570	GSE36668	ftp://ftp.ncbi.nlm.nih.gov/geo/samples/GSM898nnn/GSM898308/	GSM898308	300898308
ovarian	Homo sapiens	normal	N	NA	GPL570	GSE36668	ftp://ftp.ncbi.nlm.nih.gov/geo/samples/GSM898nnn/GSM898307/	GSM898307	300898307
ovarian	Homo sapiens	normal	N	NA	GPL570	GSE36668	ftp://ftp.ncbi.nlm.nih.gov/geo/samples/GSM898nnn/GSM898306/	GSM898306	300898306
ovarian	Homo sapiens	normal	N	NA	GPL570	GSE36668	ftp://ftp.ncbi.nlm.nih.gov/geo/samples/GSM898nnn/GSM898305/	GSM898305	300898305
ovarian	Homo sapiens	normal	N	NA	GPL570	GSE14407	ftp://ftp.ncbi.nlm.nih.gov/geo/samples/GSM359nnn/GSM359983/	GSM359983	300359983
ovarian	Homo sapiens	normal	N	NA	GPL570	GSE14407	ftp://ftp.ncbi.nlm.nih.gov/geo/samples/GSM359nnn/GSM359982/	GSM359982	300359982
ovarian	Homo sapiens	normal	N	NA	GPL570	GSE14407	ftp://ftp.ncbi.nlm.nih.gov/geo/samples/GSM359nnn/GSM359981/	GSM359981	300359981
ovarian	Homo sapiens	normal	N	NA	GPL570	GSE14407	ftp://ftp.ncbi.nlm.nih.gov/geo/samples/GSM359nnn/GSM359980/	GSM359980	300359980
ovarian	Homo sapiens	normal	N	NA	GPL570	GSE14407	ftp://ftp.ncbi.nlm.nih.gov/geo/samples/GSM359nnn/GSM359979/	GSM359979	300359979
ovarian	Homo sapiens	normal	N	NA	GPL570	GSE14407	ftp://ftp.ncbi.nlm.nih.gov/geo/samples/GSM359nnn/GSM359978/	GSM359978	300359978
ovarian	Homo sapiens	normal	N	NA	GPL570	GSE14407	ftp://ftp.ncbi.nlm.nih.gov/geo/samples/GSM359nnn/GSM359977/	GSM359977	300359977
ovarian	Homo sapiens	normal	N	NA	GPL570	GSE14407	ftp://ftp.ncbi.nlm.nih.gov/geo/samples/GSM359nnn/GSM359976/	GSM359976	300359976
ovarian	Homo sapiens	normal	N	NA	GPL570	GSE14407	ftp://ftp.ncbi.nlm.nih.gov/geo/samples/GSM359nnn/GSM359975/	GSM359975	300359975
ovarian	Homo sapiens	normal	N	NA	GPL570	GSE14407	ftp://ftp.ncbi.nlm.nih.gov/geo/samples/GSM359nnn/GSM359974/	GSM359974	300359974
ovarian	Homo sapiens	normal	N	NA	GPL570	GSE14407	ftp://ftp.ncbi.nlm.nih.gov/geo/samples/GSM359nnn/GSM359973/	GSM359973	300359973
ovarian	Homo sapiens	normal	N	NA	GPL570	GSE14407	ftp://ftp.ncbi.nlm.nih.gov/geo/samples/GSM359nnn/GSM359972/	GSM359972	300359972
ovarian	Homo sapiens	normal	N	NA	GPL570	GSE19383	ftp://ftp.ncbi.nlm.nih.gov/geo/samples/GSM481nnn/GSM481013/	GSM481013	300481013
ovarian	Homo sapiens	normal	N	NA	GPL570	GSE19383	ftp://ftp.ncbi.nlm.nih.gov/geo/samples/GSM481nnn/GSM481012/	GSM481012	300481012
ovarian	Homo sapiens	normal	N	NA	GPL570	GSE19383	ftp://ftp.ncbi.nlm.nih.gov/geo/samples/GSM481nnn/GSM481011/	GSM481011	300481011
ovarian	Homo sapiens	normal	N	NA	GPL570	GSE19383	ftp://ftp.ncbi.nlm.nih.gov/geo/samples/GSM481nnn/GSM481010/	GSM481010	300481010
ovarian	Homo sapiens	normal	N	NA	GPL570	GSE19383	ftp://ftp.ncbi.nlm.nih.gov/geo/samples/GSM481nnn/GSM481009/	GSM481009	300481009
ovarian	Homo sapiens	normal	N	NA	GPL570	GSE19383	ftp://ftp.ncbi.nlm.nih.gov/geo/samples/GSM481nnn/GSM481008/	GSM481008	300481008
ovarian	Homo sapiens	normal	N	NA	GPL570	GSE18520 GSE18521	ftp://ftp.ncbi.nlm.nih.gov/geo/samples/GSM462nnn/GSM462652/	GSM462652	300462652
ovarian	Homo sapiens	normal	N	NA	GPL570	GSE18520 GSE18521	ftp://ftp.ncbi.nlm.nih.gov/geo/samples/GSM462nnn/GSM462651/	GSM462651	300462651
ovarian	Homo sapiens	normal	N	NA	GPL570	GSE18520 GSE18521	ftp://ftp.ncbi.nlm.nih.gov/geo/samples/GSM462nnn/GSM462650/	GSM462650	300462650
ovarian	Homo sapiens	normal	N	NA	GPL570	GSE18520 GSE18521	ftp://ftp.ncbi.nlm.nih.gov/geo/samples/GSM462nnn/GSM462649/	GSM462649	300462649
ovarian	Homo sapiens	normal	N	NA	GPL570	GSE18520 GSE18521	ftp://ftp.ncbi.nlm.nih.gov/geo/samples/GSM462nnn/GSM462648/	GSM462648	300462648
ovarian	Homo sapiens	normal	N	NA	GPL570	GSE18520 GSE18521	ftp://ftp.ncbi.nlm.nih.gov/geo/samples/GSM462nnn/GSM462647/	GSM462647	300462647
ovarian	Homo sapiens	normal	N	NA	GPL570	GSE18520 GSE18521	ftp://ftp.ncbi.nlm.nih.gov/geo/samples/GSM462nnn/GSM462646/	GSM462646	300462646
ovarian	Homo sapiens	normal	N	NA	GPL570	GSE18520 GSE18521	ftp://ftp.ncbi.nlm.nih.gov/geo/samples/GSM462nnn/GSM462645/	GSM462645	300462645
ovarian	Homo sapiens	normal	N	NA	GPL570	GSE18520 GSE18521	ftp://ftp.ncbi.nlm.nih.gov/geo/samples/GSM462nnn/GSM462644/	GSM462644	300462644
ovarian	Homo sapiens	normal	N	NA	GPL570	GSE18520 GSE18521	ftp://ftp.ncbi.nlm.nih.gov/geo/samples/GSM462nnn/GSM462643/	GSM462643	300462643
ovarian	Homo sapiens	normal	N	NA	GPL570	GSE7307	ftp://ftp.ncbi.nlm.nih.gov/geo/samples/GSM176nnn/GSM176318/	GSM176318	300176318
ovarian	Homo sapiens	normal	N	NA	GPL570	GSE7307	ftp://ftp.ncbi.nlm.nih.gov/geo/samples/GSM176nnn/GSM176237/	GSM176237	300176237
ovarian	Homo sapiens	normal	N	NA	GPL570	GSE7307	ftp://ftp.ncbi.nlm.nih.gov/geo/samples/GSM176nnn/GSM176136/	GSM176136	300176136
ovarian	Homo sapiens	normal	N	NA	GPL570	GSE7307	ftp://ftp.ncbi.nlm.nih.gov/geo/samples/GSM176nnn/GSM176131/	GSM176131	300176131
ovarian	Homo sapiens	normal	N	NA	GPL570	GSE7307	ftp://ftp.ncbi.nlm.nih.gov/geo/samples/GSM175nnn/GSM175789/	GSM175789	300175789
ovarian	Homo sapiens	normal	N	NA	GPL570	GSE23391 GSE23392	ftp://ftp.ncbi.nlm.nih.gov/geo/samples/GSM573nnn/GSM573685/	GSM573685	300573685
ovarian	Homo sapiens	normal	N	NA	GPL570	GSE23391 GSE23392	ftp://ftp.ncbi.nlm.nih.gov/geo/samples/GSM573nnn/GSM573684/	GSM573684	300573684
ovarian	Homo sapiens	normal	N	NA	GPL570	GSE23391 GSE23392	ftp://ftp.ncbi.nlm.nih.gov/geo/samples/GSM573nnn/GSM573683/	GSM573683	300573683
ovarian	Homo sapiens	normal	N	NA	GPL570	GSE23391 GSE23392	ftp://ftp.ncbi.nlm.nih.gov/geo/samples/GSM573nnn/GSM573682/	GSM573682	300573682
ovarian	Homo sapiens	normal	N	NA	GPL570	GSE23391 GSE23392	ftp://ftp.ncbi.nlm.nih.gov/geo/samples/GSM573nnn/GSM573681/	GSM573681	300573681
ovarian	Homo sapiens	normal	N	NA	GPL570	GSE52037 GSE52460	ftp://ftp.ncbi.nlm.nih.gov/geo/samples/GSM1257nnn/GSM1257889/	GSM1257889	301257889
ovarian	Homo sapiens	normal	N	NA	GPL570	GSE52037 GSE52460	ftp://ftp.ncbi.nlm.nih.gov/geo/samples/GSM1257nnn/GSM1257888/	GSM1257888	301257888
ovarian	Homo sapiens	normal	N	NA	GPL570	GSE52037 GSE52460	ftp://ftp.ncbi.nlm.nih.gov/geo/samples/GSM1257nnn/GSM1257887/	GSM1257887	301257887
ovarian	Homo sapiens	normal	N	NA	GPL570	GSE52037 GSE52460	ftp://ftp.ncbi.nlm.nih.gov/geo/samples/GSM1257nnn/GSM1257886/	GSM1257886	301257886
ovarian	Homo sapiens	normal	N	NA	GPL570	GSE52037 GSE52460	ftp://ftp.ncbi.nlm.nih.gov/geo/samples/GSM1257nnn/GSM1257885/	GSM1257885	301257885
ovarian	Homo sapiens	normal	N	NA	GPL570	GSE52037 GSE52460	ftp://ftp.ncbi.nlm.nih.gov/geo/samples/GSM1257nnn/GSM1257884/	GSM1257884	301257884
ovarian	Homo sapiens	normal	N	NA	GPL570	GSE52037 GSE52460	ftp://ftp.ncbi.nlm.nih.gov/geo/samples/GSM1257nnn/GSM1257883/	GSM1257883	301257883
ovarian	Homo sapiens	normal	N	NA	GPL570	GSE52037 GSE52460	ftp://ftp.ncbi.nlm.nih.gov/geo/samples/GSM1257nnn/GSM1257882/	GSM1257882	301257882
ovarian	Homo sapiens	normal	N	NA	GPL570	GSE52037 GSE52460	ftp://ftp.ncbi.nlm.nih.gov/geo/samples/GSM1257nnn/GSM1257881/	GSM1257881	301257881
ovarian	Homo sapiens	normal	N	NA	GPL570	GSE52037 GSE52460	ftp://ftp.ncbi.nlm.nih.gov/geo/samples/GSM1257nnn/GSM1257880/	GSM1257880	301257880
ovarian	Homo sapiens	normal	N	NA	GPL570	GSE27651	ftp://ftp.ncbi.nlm.nih.gov/geo/samples/GSM372nnn/GSM372263/	GSM372263	300372263
ovarian	Homo sapiens	normal	N	NA	GPL570	GSE27651	ftp://ftp.ncbi.nlm.nih.gov/geo/samples/GSM372nnn/GSM372262/	GSM372262	300372262
ovarian	Homo sapiens	normal	N	NA	GPL570	GSE27651	ftp://ftp.ncbi.nlm.nih.gov/geo/samples/GSM372nnn/GSM372261/	GSM372261	300372261
ovarian	Homo sapiens	normal	N	NA	GPL570	GSE27651	ftp://ftp.ncbi.nlm.nih.gov/geo/samples/GSM372nnn/GSM372260/	GSM372260	300372260
ovarian	Homo sapiens	normal	N	NA	GPL570	GSE27651	ftp://ftp.ncbi.nlm.nih.gov/geo/samples/GSM372nnn/GSM372259/	GSM372259	300372259
ovarian	Homo sapiens	normal	N	NA	GPL570	GSE27651	ftp://ftp.ncbi.nlm.nih.gov/geo/samples/GSM372nnn/GSM372258/	GSM372258	300372258
ovarian	Homo sapiens	normal	N	NA	GPL570	GSE25427 GSE25429	ftp://ftp.ncbi.nlm.nih.gov/geo/samples/GSM624nnn/GSM624163/	GSM624163	300624163
ovarian	Homo sapiens	normal	N	NA	GPL570	GSE25427 GSE25429	ftp://ftp.ncbi.nlm.nih.gov/geo/samples/GSM624nnn/GSM624162/	GSM624162	300624162
ovarian	Homo sapiens	normal	N	NA	GPL570	GSE25427 GSE25429	ftp://ftp.ncbi.nlm.nih.gov/geo/samples/GSM624nnn/GSM624146/	GSM624146	300624146
ovarian	Homo sapiens	normal	N	NA	GPL570	GSE25427 GSE25429	ftp://ftp.ncbi.nlm.nih.gov/geo/samples/GSM624nnn/GSM624145/	GSM624145	300624145
ovarian	Homo sapiens	normal	N	NA	GPL570	GSE14001	ftp://ftp.ncbi.nlm.nih.gov/geo/samples/GSM351nnn/GSM351320/	GSM351320	300351320
ovarian	Homo sapiens	normal	N	NA	GPL570	GSE14001	ftp://ftp.ncbi.nlm.nih.gov/geo/samples/GSM351nnn/GSM351318/	GSM351318	300351318
ovarian	Homo sapiens	normal	N	NA	GPL570	GSE40266	ftp://ftp.ncbi.nlm.nih.gov/geo/samples/GSM989nnn/GSM989499/	GSM989499	300989499
ovarian	Homo sapiens	normal	N	NA	GPL570	GSE40266	ftp://ftp.ncbi.nlm.nih.gov/geo/samples/GSM989nnn/GSM989496/	GSM989496	300989496
ovarian	Homo sapiens	normal	N	NA	GPL570	GSE40266	ftp://ftp.ncbi.nlm.nih.gov/geo/samples/GSM989nnn/GSM989494/	GSM989494	300989494
ovarian	Homo sapiens	normal	N	NA	GPL570	GSE40266	ftp://ftp.ncbi.nlm.nih.gov/geo/samples/GSM989nnn/GSM989492/	GSM989492	300989492
ovarian	Homo sapiens	normal	N	NA	GPL570	GSE40266	ftp://ftp.ncbi.nlm.nih.gov/geo/samples/GSM989nnn/GSM989490/	GSM989490	300989490
ovarian	Homo sapiens	normal	N	NA	GPL570	GSE40266	ftp://ftp.ncbi.nlm.nih.gov/geo/samples/GSM989nnn/GSM989488/	GSM989488	300989488
ovarian	Homo sapiens	normal	N	NA	GPL570	GSE40266	ftp://ftp.ncbi.nlm.nih.gov/geo/samples/GSM989nnn/GSM989485/	GSM989485	300989485
ovarian	Homo sapiens	normal	N	NA	GPL570	GSE40266	ftp://ftp.ncbi.nlm.nih.gov/geo/samples/GSM989nnn/GSM989483/	GSM989483	300989483
ovarian	Homo sapiens	normal	N	NA	GPL570	GSE40266	ftp://ftp.ncbi.nlm.nih.gov/geo/samples/GSM989nnn/GSM989481/	GSM989481	300989481
ovarian	Homo sapiens	normal	N	NA	GPL570	GSE15578	ftp://ftp.ncbi.nlm.nih.gov/geo/samples/GSM389nnn/GSM389794/	GSM389794	300389794
ovarian	Homo sapiens	normal	N	NA	GPL570	GSE15578	ftp://ftp.ncbi.nlm.nih.gov/geo/samples/GSM389nnn/GSM389791/	GSM389791	300389791
ovarian	Homo sapiens	normal	N	NA	GPL570	GSE15578	ftp://ftp.ncbi.nlm.nih.gov/geo/samples/GSM389nnn/GSM389790/	GSM389790	300389790
ovarian	Homo sapiens	normal	N	NA	GPL570	GSE15578	ftp://ftp.ncbi.nlm.nih.gov/geo/samples/GSM389nnn/GSM389789/	GSM389789	300389789
ovarian	Homo sapiens	normal	N	NA	GPL570	GSE15578	ftp://ftp.ncbi.nlm.nih.gov/geo/samples/GSM389nnn/GSM389783/	GSM389783	300389783
ovarian	Homo sapiens	normal	N	NA	GPL570	GSE15578	ftp://ftp.ncbi.nlm.nih.gov/geo/samples/GSM389nnn/GSM389782/	GSM389782	300389782
ovarian	Homo sapiens	normal	N	NA	GPL570	GSE29450	ftp://ftp.ncbi.nlm.nih.gov/geo/samples/GSM729nnn/GSM729053/	GSM729053	300729053
ovarian	Homo sapiens	normal	N	NA	GPL570	GSE29450	ftp://ftp.ncbi.nlm.nih.gov/geo/samples/GSM729nnn/GSM729052/	GSM729052	300729052
ovarian	Homo sapiens	normal	N	NA	GPL570	GSE29450	ftp://ftp.ncbi.nlm.nih.gov/geo/samples/GSM729nnn/GSM729051/	GSM729051	300729051
ovarian	Homo sapiens	normal	N	NA	GPL570	GSE29450	ftp://ftp.ncbi.nlm.nih.gov/geo/samples/GSM729nnn/GSM729050/	GSM729050	300729050
ovarian	Homo sapiens	normal	N	NA	GPL570	GSE29450	ftp://ftp.ncbi.nlm.nih.gov/geo/samples/GSM729nnn/GSM729049/	GSM729049	300729049
ovarian	Homo sapiens	normal	N	NA	GPL570	GSE29450	ftp://ftp.ncbi.nlm.nih.gov/geo/samples/GSM729nnn/GSM729048/	GSM729048	300729048
ovarian	Homo sapiens	normal	N	NA	GPL570	GSE29450	ftp://ftp.ncbi.nlm.nih.gov/geo/samples/GSM729nnn/GSM729047/	GSM729047	300729047
ovarian	Homo sapiens	normal	N	NA	GPL570	GSE29450	ftp://ftp.ncbi.nlm.nih.gov/geo/samples/GSM729nnn/GSM729046/	GSM729046	300729046
ovarian	Homo sapiens	normal	N	NA	GPL570	GSE29450	ftp://ftp.ncbi.nlm.nih.gov/geo/samples/GSM729nnn/GSM729045/	GSM729045	300729045
ovarian	Homo sapiens	normal	N	NA	GPL570	GSE29450	ftp://ftp.ncbi.nlm.nih.gov/geo/samples/GSM729nnn/GSM729044/	GSM729044	300729044
ovarian	Homo sapiens	normal	N	NA	GPL6947	GSE16570 GSE16574	ftp://ftp.ncbi.nlm.nih.gov/geo/samples/GSM416nnn/GSM416674/	GSM416674	300416674
ovarian	Homo sapiens	normal	N	NA	GPL6947	GSE16570 GSE16574	ftp://ftp.ncbi.nlm.nih.gov/geo/samples/GSM416nnn/GSM416673/	GSM416673	300416673
ovarian	Homo sapiens	normal	N	NA	GPL6947	GSE16570 GSE16574	ftp://ftp.ncbi.nlm.nih.gov/geo/samples/GSM416nnn/GSM416672/	GSM416672	300416672
ovarian	Homo sapiens	normal	N	NA	GPL6947	GSE16570 GSE16574	ftp://ftp.ncbi.nlm.nih.gov/geo/samples/GSM416nnn/GSM416671/	GSM416671	300416671
ovarian	Homo sapiens	normal	N	NA	GPL6947	GSE16570 GSE16574	ftp://ftp.ncbi.nlm.nih.gov/geo/samples/GSM416nnn/GSM416670/	GSM416670	300416670
ovarian	Homo sapiens	normal	N	NA	GPL6947	GSE16570 GSE16574	ftp://ftp.ncbi.nlm.nih.gov/geo/samples/GSM416nnn/GSM416669/	GSM416669	300416669
ovarian	Homo sapiens	normal	N	NA	GPL7264	GSE51088	ftp://ftp.ncbi.nlm.nih.gov/geo/samples/GSM1238nnn/GSM1238309/	GSM1238309	301238309
ovarian	Homo sapiens	normal	N	NA	GPL7264	GSE51088	ftp://ftp.ncbi.nlm.nih.gov/geo/samples/GSM1238nnn/GSM1238299/	GSM1238299	301238299
ovarian	Homo sapiens	normal	N	NA	GPL7264	GSE51088	ftp://ftp.ncbi.nlm.nih.gov/geo/samples/GSM1238nnn/GSM1238280/	GSM1238280	301238280
ovarian	Homo sapiens	normal	N	NA	GPL7264	GSE51088	ftp://ftp.ncbi.nlm.nih.gov/geo/samples/GSM1238nnn/GSM1238274/	GSM1238274	301238274
ovarian	Homo sapiens	normal	N	NA	GPL7264	GSE51088	ftp://ftp.ncbi.nlm.nih.gov/geo/samples/GSM1238nnn/GSM1238271/	GSM1238271	301238271
ovarian	Homo sapiens	normal	N	NA	GPL7264	GSE51088	ftp://ftp.ncbi.nlm.nih.gov/geo/samples/GSM1238nnn/GSM1238266/	GSM1238266	301238266
ovarian	Homo sapiens	normal	N	NA	GPL7264	GSE51088	ftp://ftp.ncbi.nlm.nih.gov/geo/samples/GSM1238nnn/GSM1238265/	GSM1238265	301238265
ovarian	Homo sapiens	normal	N	NA	GPL7264	GSE51088	ftp://ftp.ncbi.nlm.nih.gov/geo/samples/GSM1238nnn/GSM1238254/	GSM1238254	301238254
ovarian	Homo sapiens	normal	N	NA	GPL7264	GSE51088	ftp://ftp.ncbi.nlm.nih.gov/geo/samples/GSM1238nnn/GSM1238248/	GSM1238248	301238248
ovarian	Homo sapiens	normal	N	NA	GPL7264	GSE51088	ftp://ftp.ncbi.nlm.nih.gov/geo/samples/GSM1238nnn/GSM1238247/	GSM1238247	301238247
ovarian	Homo sapiens	normal	N	NA	GPL7264	GSE51088	ftp://ftp.ncbi.nlm.nih.gov/geo/samples/GSM1238nnn/GSM1238187/	GSM1238187	301238187
ovarian	Homo sapiens	normal	N	NA	GPL7264	GSE51088	ftp://ftp.ncbi.nlm.nih.gov/geo/samples/GSM1238nnn/GSM1238185/	GSM1238185	301238185
ovarian	Homo sapiens	normal	N	NA	GPL7264	GSE51088	ftp://ftp.ncbi.nlm.nih.gov/geo/samples/GSM1238nnn/GSM1238177/	GSM1238177	301238177
ovarian	Homo sapiens	normal	N	NA	GPL7264	GSE51088	ftp://ftp.ncbi.nlm.nih.gov/geo/samples/GSM1238nnn/GSM1238170/	GSM1238170	301238170
ovarian	Homo sapiens	normal	N	NA	GPL7264	GSE51088	ftp://ftp.ncbi.nlm.nih.gov/geo/samples/GSM1238nnn/GSM1238157/	GSM1238157	301238157
ovarian	Homo sapiens	normal	N	NA	GPL96	GSE34405	ftp://ftp.ncbi.nlm.nih.gov/geo/samples/GSM848nnn/GSM848595/	GSM848595	300848595
ovarian	Homo sapiens	normal	N	NA	GPL96	GSE34405	ftp://ftp.ncbi.nlm.nih.gov/geo/samples/GSM848nnn/GSM848594/	GSM848594	300848594
ovarian	Homo sapiens	normal	N	NA	GPL96	GSE34405	ftp://ftp.ncbi.nlm.nih.gov/geo/samples/GSM848nnn/GSM848593/	GSM848593	300848593
ovarian	Homo sapiens	normal	N	NA	GPL96	GSE18155	ftp://ftp.ncbi.nlm.nih.gov/geo/samples/GSM453nnn/GSM453866/	GSM453866	300453866
ovarian	Homo sapiens	normal	N	NA	GPL96	GSE18155	ftp://ftp.ncbi.nlm.nih.gov/geo/samples/GSM453nnn/GSM453865/	GSM453865	300453865
ovarian	Homo sapiens	normal	N	NA	GPL96	GSE18155	ftp://ftp.ncbi.nlm.nih.gov/geo/samples/GSM453nnn/GSM453864/	GSM453864	300453864
ovarian	Homo sapiens	normal	N	NA	GPL96	GSE26712	ftp://ftp.ncbi.nlm.nih.gov/geo/samples/GSM657nnn/GSM657528/	GSM657528	300657528
ovarian	Homo sapiens	normal	N	NA	GPL96	GSE26712	ftp://ftp.ncbi.nlm.nih.gov/geo/samples/GSM657nnn/GSM657527/	GSM657527	300657527
ovarian	Homo sapiens	normal	N	NA	GPL96	GSE26712	ftp://ftp.ncbi.nlm.nih.gov/geo/samples/GSM657nnn/GSM657526/	GSM657526	300657526
ovarian	Homo sapiens	normal	N	NA	GPL96	GSE26712	ftp://ftp.ncbi.nlm.nih.gov/geo/samples/GSM657nnn/GSM657525/	GSM657525	300657525
ovarian	Homo sapiens	normal	N	NA	GPL96	GSE26712	ftp://ftp.ncbi.nlm.nih.gov/geo/samples/GSM657nnn/GSM657524/	GSM657524	300657524
ovarian	Homo sapiens	normal	N	NA	GPL96	GSE26712	ftp://ftp.ncbi.nlm.nih.gov/geo/samples/GSM657nnn/GSM657523/	GSM657523	300657523
ovarian	Homo sapiens	normal	N	NA	GPL96	GSE26712	ftp://ftp.ncbi.nlm.nih.gov/geo/samples/GSM657nnn/GSM657522/	GSM657522	300657522
ovarian	Homo sapiens	normal	N	NA	GPL96	GSE26712	ftp://ftp.ncbi.nlm.nih.gov/geo/samples/GSM657nnn/GSM657521/	GSM657521	300657521
ovarian	Homo sapiens	normal	N	NA	GPL96	GSE26712	ftp://ftp.ncbi.nlm.nih.gov/geo/samples/GSM657nnn/GSM657520/	GSM657520	300657520
ovarian	Homo sapiens	normal	N	NA	GPL96	GSE26712	ftp://ftp.ncbi.nlm.nih.gov/geo/samples/GSM657nnn/GSM657519/	GSM657519	300657519
ovarian	Homo sapiens	normal	N	NA	GPL96	GSE6008	ftp://ftp.ncbi.nlm.nih.gov/geo/samples/GSM139nnn/GSM139479/	GSM139479	300139479
ovarian	Homo sapiens	normal	N	NA	GPL96	GSE6008	ftp://ftp.ncbi.nlm.nih.gov/geo/samples/GSM139nnn/GSM139478/	GSM139478	300139478
ovarian	Homo sapiens	normal	N	NA	GPL96	GSE6008	ftp://ftp.ncbi.nlm.nih.gov/geo/samples/GSM139nnn/GSM139477/	GSM139477	300139477
ovarian	Homo sapiens	normal	N	NA	GPL96	GSE6008	ftp://ftp.ncbi.nlm.nih.gov/geo/samples/GSM139nnn/GSM139476/	GSM139476	300139476

## Sheet: Table S2
Table S2. Complete GO terms and p values.
stage I	p value	stage II	p value	stage III	p value	stage IV	p value
CALCIUM CHANNEL ACTIVITY	2.48052e-09	LYSOSOMAL MEMBRANE	2.69824e-13	PROTEIN TYROSINE KINASE ACTIVITY	3.33277e-42	LYSOSOMAL MEMBRANE	9.69471e-33
CELL MATURATION	2.48052e-09	VACUOLAR MEMBRANE	2.69824e-13	VITAMIN METABOLIC PROCESS	2.72559e-41	VACUOLAR MEMBRANE	9.69471e-33
OXYGEN BINDING	2.48052e-09	REGULATION OF ACTIN FILAMENT LENGTH	1.9734e-12	OXIDOREDUCTASE ACTIVITY ACTING ON THE ALDEHYDE OR OXO GROUP OF DONORS	5.0603e-41	REGULATION OF ACTIN FILAMENT LENGTH	7.82577e-30
SECRETIN LIKE RECEPTOR ACTIVITY	3.25008e-09	REGULATION OF ACTIN POLYMERIZATION AND OR DEPOLYMERIZATION	1.9734e-12	REGULATION OF ACTIN FILAMENT LENGTH	5.0603e-41	REGULATION OF CELLULAR COMPONENT SIZE	7.82577e-30
LYSOSOMAL MEMBRANE	4.55126e-09	REGULATION OF CELLULAR COMPONENT SIZE	1.9734e-12	REGULATION OF ACTIN POLYMERIZATION AND OR DEPOLYMERIZATION	5.0603e-41	REGULATION OF ACTIN POLYMERIZATION AND OR DEPOLYMERIZATION	5.97028e-29
VACUOLAR MEMBRANE	4.55126e-09	AMINO ACID DERIVATIVE METABOLIC PROCESS	2.23406e-09	REGULATION OF CELLULAR COMPONENT SIZE	5.0603e-41	VACUOLAR PART	5.05414e-27
DEVELOPMENTAL MATURATION	1.77788e-08	RESPONSE TO HORMONE STIMULUS	2.23406e-09	SPINDLE POLE	5.0603e-41	CELL DIVISION	1.04861e-26
TASTE RECEPTOR ACTIVITY	5.84641e-08	VACUOLAR PART	2.44562e-09	HOMOPHILIC CELL ADHESION	8.70124e-41	CYTOKINESIS	3.71839e-26
HEMATOPOIETIN INTERFERON CLASSD200 DOMAIN CYTOKINE RECEPTOR BINDING	7.82488e-08	NEUROPEPTIDE SIGNALING PATHWAY	6.86213e-09	SINGLE STRANDED DNA BINDING	4.34406e-40	CELL MATURATION	4.56914e-26
COFACTOR TRANSPORTER ACTIVITY	1.1983e-07	G PROTEIN COUPLED RECEPTOR BINDING	7.58454e-09	INNATE IMMUNE RESPONSE	4.70352e-40	AMINO ACID DERIVATIVE METABOLIC PROCESS	5.78731e-26
AUXILIARY TRANSPORT PROTEIN ACTIVITY	1.24295e-07	VITAMIN METABOLIC PROCESS	9.5755e-09	SPINDLE	1.57788e-38	VITAMIN METABOLIC PROCESS	7.88037e-26
HORMONE ACTIVITY	1.24295e-07	STEROID HORMONE RECEPTOR BINDING	1.58623e-08	DAMAGED DNA BINDING	5.74077e-37	RESPONSE TO HORMONE STIMULUS	1.14538e-25
ORGANIC ANION TRANSMEMBRANE TRANSPORTER ACTIVITY	1.24295e-07	AROMATIC COMPOUND METABOLIC PROCESS	1.74383e-08	RHO PROTEIN SIGNAL TRANSDUCTION	8.72741e-37	CALCIUM CHANNEL ACTIVITY	1.26557e-25
RESPONSE TO HORMONE STIMULUS	1.24295e-07	CELL MATURATION	1.77228e-08	MICROTUBULE CYTOSKELETON	1.88191e-36	COENZYME BINDING	2.60087e-25
POTASSIUM CHANNEL REGULATOR ACTIVITY	1.31485e-07	CHAPERONE BINDING	1.77228e-08	STRUCTURE SPECIFIC DNA BINDING	1.88191e-36	DEVELOPMENTAL MATURATION	2.73844e-25
CELL DIVISION	4.1076e-07	INOSITOL OR PHOSPHATIDYLINOSITOL PHOSPHATASE ACTIVITY	1.77228e-08	PHOSPHORIC MONOESTER HYDROLASE ACTIVITY	2.87047e-36	PROTEIN TYROSINE KINASE ACTIVITY	1.21612e-24
SARCOMERE	4.85574e-07	CELL DIVISION	1.80813e-08	CELL CYCLE CHECKPOINT GO 0000075	7.62114e-36	NUCLEOTIDE SUGAR METABOLIC PROCESS	1.30903e-24
NEUROPEPTIDE SIGNALING PATHWAY	5.82091e-07	SECRETIN LIKE RECEPTOR ACTIVITY	2.15831e-08	LIPID KINASE ACTIVITY	1.1026e-35	NEGATIVE REGULATION OF CELLULAR COMPONENT ORGANIZATION AND BIOGENESIS	1.5956e-24
NEUROTRANSMITTER BINDING	6.23648e-07	CYTOKINESIS	2.8977e-08	HORMONE METABOLIC PROCESS	1.35794e-35	HOMOPHILIC CELL ADHESION	2.53828e-24
VACUOLAR PART	7.20362e-07	TRANSFERASE ACTIVITY TRANSFERRING SULFUR CONTAINING GROUPS	2.8977e-08	CELL CELL ADHESION	1.46792e-35	REGULATION OF CELL CELL ADHESION	2.53828e-24
CHANNEL REGULATOR ACTIVITY	8.40169e-07	HORMONE ACTIVITY	4.71632e-08	ACTIN CYTOSKELETON	1.92119e-35	INNATE IMMUNE RESPONSE	5.48362e-24
CHAPERONE BINDING	1.08384e-06	HUMORAL IMMUNE RESPONSE	5.10625e-08	DOUBLE STRANDED DNA BINDING	2.47212e-35	COFACTOR BINDING	9.45012e-24
GLUTAMATE SIGNALING PATHWAY	1.08384e-06	NEGATIVE REGULATION OF CELLULAR COMPONENT ORGANIZATION AND BIOGENESIS	6.36427e-08	CELL MATURATION	2.50493e-35	ENDODEOXYRIBONUCLEASE ACTIVITY	3.9418e-23
HUMORAL IMMUNE RESPONSE	1.08384e-06	SPINDLE POLE	8.98273e-08	AMINE BINDING	2.8518e-35	CELL CYCLE CHECKPOINT GO 0000075	5.36173e-23
G PROTEIN COUPLED RECEPTOR ACTIVITY	1.75119e-06	NEUROPEPTIDE BINDING	8.98363e-08	OXIDOREDUCTASE ACTIVITY ACTING ON THE ALDEHYDE OR OXO GROUP OF DONORSNAD OR NADP AS ACCEPTOR	3.82811e-35	SPINDLE	8.96406e-23
AMINO ACID DERIVATIVE METABOLIC PROCESS	1.8287e-06	NEUROPEPTIDE RECEPTOR ACTIVITY	8.98363e-08	REGULATION OF ORGANELLE ORGANIZATION AND BIOGENESIS	3.82811e-35	SPINDLE POLE	1.17652e-22
CATION CHANNEL ACTIVITY	1.97916e-06	SULFOTRANSFERASE ACTIVITY	9.03348e-08	REGULATION OF CYCLIN DEPENDENT PROTEIN KINASE ACTIVITY	8.57705e-35	LIGAND GATED CHANNEL ACTIVITY	1.22607e-22
CARBOHYDRATE BIOSYNTHETIC PROCESS	2.0496e-06	DEVELOPMENTAL MATURATION	9.97618e-08	SMALL GTPASE MEDIATED SIGNAL TRANSDUCTION	8.57705e-35	EMBRYONIC DEVELOPMENT	1.4173e-22
COFACTOR TRANSPORT	2.0496e-06	AUXILIARY TRANSPORT PROTEIN ACTIVITY	1.0009e-07	SH3 SH2 ADAPTOR ACTIVITY	2.00124e-34	DEFENSE RESPONSE TO VIRUS	2.59158e-22
NEUROPEPTIDE BINDING	2.41971e-06	CARBOHYDRATE BIOSYNTHETIC PROCESS	1.02117e-07	CALCIUM CHANNEL ACTIVITY	2.23741e-34	AROMATIC COMPOUND METABOLIC PROCESS	3.70812e-22
NEUROPEPTIDE RECEPTOR ACTIVITY	2.41971e-06	CYTOSOLIC PART	1.02117e-07	MAGNESIUM ION BINDING	2.77179e-34	HUMORAL IMMUNE RESPONSE	4.80462e-22
NEUROTRANSMITTER RECEPTOR ACTIVITY	2.41971e-06	NUCLEOSOME ASSEMBLY	1.02117e-07	AUXILIARY TRANSPORT PROTEIN ACTIVITY	5.10282e-34	TRICARBOXYLIC ACID CYCLE INTERMEDIATE METABOLIC PROCESS	4.85717e-22
CHLORIDE CHANNEL ACTIVITY	2.59412e-06	ISOMERASE ACTIVITY	1.52907e-07	RAS PROTEIN SIGNAL TRANSDUCTION	5.21466e-34	DAMAGED DNA BINDING	5.3951e-22
SYNAPTIC TRANSMISSION	2.71967e-06	CALCIUM CHANNEL ACTIVITY	2.69145e-07	VOLTAGE GATED CHANNEL ACTIVITY	6.02602e-34	G PROTEIN COUPLED RECEPTOR BINDING	7.09491e-22
ION CHANNEL ACTIVITY	2.80216e-06	GABA RECEPTOR ACTIVITY	2.69145e-07	NEGATIVE REGULATION OF CELLULAR COMPONENT ORGANIZATION AND BIOGENESIS	6.36418e-34	DEOXYRIBONUCLEASE ACTIVITY	7.186e-22
NEUROLOGICAL SYSTEM PROCESS	2.80216e-06	COFACTOR CATABOLIC PROCESS	3.66382e-07	NEGATIVE REGULATION OF CELL PROLIFERATION	8.27722e-34	AUXILIARY TRANSPORT PROTEIN ACTIVITY	9.77471e-22
INOSITOL OR PHOSPHATIDYLINOSITOL PHOSPHATASE ACTIVITY	2.88802e-06	ACTIVATION OF PROTEIN KINASE ACTIVITY	4.04654e-07	ACTIN POLYMERIZATION AND OR DEPOLYMERIZATION	1.13229e-33	ISOMERASE ACTIVITY	9.77471e-22
CYTOKINESIS	3.29281e-06	DOUBLE STRANDED DNA BINDING	4.04654e-07	PROTEIN KINASE ACTIVITY	3.44213e-33	OXIDOREDUCTASE ACTIVITY ACTING ON THE ALDEHYDE OR OXO GROUP OF DONORS	9.77471e-22
INTERMEDIATE FILAMENT	3.29281e-06	PROTEIN POLYUBIQUITINATION	4.04654e-07	TRANSPORT VESICLE	5.24501e-33	REGULATION OF CYCLIN DEPENDENT PROTEIN KINASE ACTIVITY	1.00237e-21
INTERMEDIATE FILAMENT CYTOSKELETON	3.29281e-06	PROTEIN TYROSINE KINASE ACTIVITY	4.04654e-07	MICROTUBULE BASED PROCESS	6.5576e-33	TRANSFERASE ACTIVITY TRANSFERRING SULFUR CONTAINING GROUPS	1.00237e-21
SUBSTRATE SPECIFIC CHANNEL ACTIVITY	3.29281e-06	COENZYME BINDING	4.27917e-07	MOLECULAR ADAPTOR ACTIVITY	7.6991e-33	PROTEIN N TERMINUS BINDING	1.00968e-21
SULFOTRANSFERASE ACTIVITY	3.54043e-06	ACTIN FILAMENT BUNDLE FORMATION	5.47046e-07	G PROTEIN COUPLED RECEPTOR BINDING	1.14293e-32	REGULATION OF ORGANELLE ORGANIZATION AND BIOGENESIS	1.06329e-21
VITAMIN METABOLIC PROCESS	3.54043e-06	REGULATION OF RAS GTPASE ACTIVITY	5.47046e-07	GATED CHANNEL ACTIVITY	1.62628e-32	DOUBLE STRANDED DNA BINDING	1.10397e-21
SYSTEM PROCESS	4.59703e-06	REGULATION OF RHO GTPASE ACTIVITY	5.47046e-07	ADP BINDING	3.80141e-32	AMINO ACID TRANSPORT	1.69462e-21
TRANSMISSION OF NERVE IMPULSE	4.59703e-06	CHANNEL REGULATOR ACTIVITY	5.7615e-07	KINASE ACTIVITY	3.80141e-32	OXYGEN BINDING	1.79346e-21
G PROTEIN COUPLED RECEPTOR BINDING	4.93498e-06	EMBRYONIC DEVELOPMENT	5.7615e-07	CHANNEL REGULATOR ACTIVITY	5.98496e-32	TRANSPORT VESICLE	2.47874e-21
CYCLIC NUCLEOTIDE MEDIATED SIGNALING	5.10015e-06	OXIDOREDUCTASE ACTIVITY ACTING ON THE ALDEHYDE OR OXO GROUP OF DONORS	5.7615e-07	TRANSMEMBRANE RECEPTOR PROTEIN TYROSINE KINASE ACTIVITY	1.12774e-31	NEGATIVE REGULATION OF CELL PROLIFERATION	2.57171e-21
G PROTEIN SIGNALING COUPLED TO CYCLIC NUCLEOTIDE SECOND MESSENGER	5.10015e-06	NEUROTRANSMITTER BINDING	5.91248e-07	M PHASE OF MITOTIC CELL CYCLE	1.25858e-31	CALCIUM ION TRANSPORT	3.29952e-21
RHODOPSIN LIKE RECEPTOR ACTIVITY	6.4955e-06	SH3 SH2 ADAPTOR ACTIVITY	8.195e-07	SMALL GTPASE REGULATOR ACTIVITY	1.93178e-31	CHANNEL REGULATOR ACTIVITY	3.43863e-21
TRANSFERASE ACTIVITY TRANSFERRING SULFUR CONTAINING GROUPS	6.85477e-06	HOMOPHILIC CELL ADHESION	8.27079e-07	INDUCTION OF APOPTOSIS BY EXTRACELLULAR SIGNALS	1.9342e-31	TRANSMEMBRANE RECEPTOR PROTEIN TYROSINE KINASE ACTIVITY	3.43863e-21
LIPID KINASE ACTIVITY	6.90889e-06	NEUROTRANSMITTER RECEPTOR ACTIVITY	8.48876e-07	CYTOSKELETAL PART	2.06751e-31	POST GOLGI VESICLE MEDIATED TRANSPORT	4.58722e-21
CYTOKINE ACTIVITY	7.45689e-06	TRANSPORT VESICLE	1.00701e-06	LIGAND GATED CHANNEL ACTIVITY	3.36597e-31	GABA RECEPTOR ACTIVITY	4.77223e-21
MYOSIN COMPLEX	8.2261e-06	GTPASE ACTIVATOR ACTIVITY	1.02401e-06	REGULATION OF CELLULAR COMPONENT ORGANIZATION AND BIOGENESIS	3.36597e-31	DI TRI VALENT INORGANIC CATION TRANSPORT	5.03479e-21
REGULATION OF VIRAL REPRODUCTION	8.2261e-06	MOLECULAR ADAPTOR ACTIVITY	1.10039e-06	UBIQUITIN LIGASE COMPLEX	3.78452e-31	PROTEIN TETRAMERIZATION	5.03479e-21
ADP BINDING	1.01698e-05	POTASSIUM CHANNEL REGULATOR ACTIVITY	1.23537e-06	PHOSPHOTRANSFERASE ACTIVITY ALCOHOL GROUP AS ACCEPTOR	5.39887e-31	NEUROPEPTIDE SIGNALING PATHWAY	5.3768e-21
STEROID BINDING	1.01698e-05	TRICARBOXYLIC ACID CYCLE INTERMEDIATE METABOLIC PROCESS	1.23881e-06	DEVELOPMENTAL MATURATION	6.00608e-31	PERIPHERAL NERVOUS SYSTEM DEVELOPMENT	8.23077e-21
STEROL BINDING	1.02609e-05	COFACTOR BINDING	1.24817e-06	CHROMATIN ASSEMBLY	6.51786e-31	EXONUCLEASE ACTIVITY	9.14622e-21
NUCLEAR UBIQUITIN LIGASE COMPLEX	1.06169e-05	RHO PROTEIN SIGNAL TRANSDUCTION	1.24817e-06	CELL DIVISION	8.12928e-31	POSITIVE REGULATION OF SECRETION	1.18331e-20
ION TRANSPORT	1.09982e-05	INTEGRIN COMPLEX	1.29044e-06	CHROMOSOME ORGANIZATION AND BIOGENESIS	1.00479e-30	HORMONE METABOLIC PROCESS	1.24126e-20
COENZYME BINDING	1.17797e-05	SPINDLE	1.30136e-06	VOLTAGE GATED CATION CHANNEL ACTIVITY	1.11986e-30	REGULATION OF PH	1.44283e-20
LIGAND GATED CHANNEL ACTIVITY	1.18617e-05	COFACTOR TRANSPORT	1.46881e-06	ISOMERASE ACTIVITY	1.16098e-30	TRANS GOLGI NETWORK	1.86335e-20
GATED CHANNEL ACTIVITY	1.23123e-05	DI TRI VALENT INORGANIC CATION TRANSPORT	1.53175e-06	PROTEIN HOMOOLIGOMERIZATION	1.53018e-30	STRUCTURE SPECIFIC DNA BINDING	2.1903e-20
AMINE BINDING	1.31693e-05	AMINE METABOLIC PROCESS	1.57534e-06	CATION CHANNEL ACTIVITY	1.7759e-30	EXTRACELLULAR MATRIX STRUCTURAL CONSTITUENT	2.24256e-20
GROWTH FACTOR ACTIVITY	1.42785e-05	CELL MIGRATION	1.57534e-06	TRANSFERASE ACTIVITY TRANSFERRING PHOSPHORUS CONTAINING GROUPS	1.7759e-30	GTPASE ACTIVATOR ACTIVITY	2.68158e-20
STRUCTURAL CONSTITUENT OF MUSCLE	1.42785e-05	NEGATIVE REGULATION OF CYTOSKELETON ORGANIZATION AND BIOGENESIS	1.70886e-06	REGULATION OF CELL CYCLE	1.85264e-30	MICROTUBULE CYTOSKELETON ORGANIZATION AND BIOGENESIS	2.69178e-20
ANION CHANNEL ACTIVITY	1.57124e-05	NEGATIVE REGULATION OF CELL PROLIFERATION	1.88304e-06	CELL CYCLE PHASE	2.59759e-30	REGULATION OF CYTOSKELETON ORGANIZATION AND BIOGENESIS	2.79997e-20
AMINE RECEPTOR ACTIVITY	1.73142e-05	INTRAMOLECULAR OXIDOREDUCTASE ACTIVITY	1.97907e-06	CELL CYCLE GO 0007049	4.92333e-30	HORMONE ACTIVITY	3.11955e-20
CORTICAL ACTIN CYTOSKELETON	2.05149e-05	ORGANELLE OUTER MEMBRANE	1.97907e-06	MITOTIC CELL CYCLE CHECKPOINT	4.92333e-30	ACTIVATION OF JNK ACTIVITY	3.26245e-20
G PROTEIN COUPLED RECEPTOR PROTEIN SIGNALING PATHWAY	2.11189e-05	OUTER MEMBRANE	1.97907e-06	MITOSIS	5.1928e-30	PROTEIN PROCESSING	3.52059e-20
SPINDLE POLE	2.11189e-05	NITROGEN COMPOUND METABOLIC PROCESS	2.04063e-06	OXYGEN BINDING	5.1928e-30	MOLECULAR ADAPTOR ACTIVITY	3.57507e-20
GABA RECEPTOR ACTIVITY	2.2253e-05	REGULATION OF ORGANELLE ORGANIZATION AND BIOGENESIS	2.16746e-06	AMINO ACID DERIVATIVE METABOLIC PROCESS	5.30163e-30	OXIDOREDUCTASE ACTIVITY GO 0016616	3.57507e-20
CALCIUM ION TRANSPORT	2.27604e-05	OXIDOREDUCTASE ACTIVITY ACTING ON THE ALDEHYDE OR OXO GROUP OF DONORSNAD OR NADP AS ACCEPTOR	2.47249e-06	DNA REPLICATION	5.45306e-30	SULFOTRANSFERASE ACTIVITY	4.56729e-20
ISOMERASE ACTIVITY	2.61935e-05	EXONUCLEASE ACTIVITY	2.57412e-06	REGULATION OF TRANSCRIPTION FROM RNA POLYMERASE II PROMOTER	6.07652e-30	GLYCOSAMINOGLYCAN BINDING	5.50954e-20
SECOND MESSENGER MEDIATED SIGNALING	3.26026e-05	SMALL GTPASE MEDIATED SIGNAL TRANSDUCTION	2.5905e-06	GTPASE ACTIVATOR ACTIVITY	6.61455e-30	SINGLE STRANDED DNA BINDING	6.84301e-20
AROMATIC COMPOUND METABOLIC PROCESS	3.55339e-05	DAMAGED DNA BINDING	3.40171e-06	INTRAMOLECULAR OXIDOREDUCTASE ACTIVITY	6.93173e-30	CELL MIGRATION	7.92343e-20
HISTONE DEACETYLASE BINDING	3.55339e-05	CALCIUM ION TRANSPORT	3.45573e-06	CARBOHYDRATE BIOSYNTHETIC PROCESS	6.95449e-30	MICROTUBULE CYTOSKELETON	7.92343e-20
SENSORY PERCEPTION	3.55339e-05	CELL CYCLE CHECKPOINT GO 0000075	3.45573e-06	M PHASE	8.7897e-30	NEGATIVE REGULATION OF CYTOSKELETON ORGANIZATION AND BIOGENESIS	7.92343e-20
ALDO KETO REDUCTASE ACTIVITY	3.65856e-05	CHROMATIN ASSEMBLY	3.45573e-06	CELL JUNCTION	8.90158e-30	ADENYL NUCLEOTIDE BINDING	8.0591e-20
OXIDOREDUCTASE ACTIVITY GO 0016705	3.711e-05	MICROTUBULE BASED PROCESS	4.25861e-06	CYTOSKELETON ORGANIZATION AND BIOGENESIS	8.90158e-30	AMINE BINDING	8.0591e-20
DI TRI VALENT INORGANIC CATION TRANSPORT	3.95943e-05	COFACTOR TRANSPORTER ACTIVITY	4.38448e-06	REGULATION OF MITOSIS	9.66374e-30	GATED CHANNEL ACTIVITY	8.18222e-20
RHO PROTEIN SIGNAL TRANSDUCTION	3.97041e-05	LIPID KINASE ACTIVITY	4.95815e-06	NUCLEOSIDE TRIPHOSPHATASE ACTIVITY	1.00712e-29	SH3 SH2 ADAPTOR ACTIVITY	8.72401e-20
AMINO ACID DERIVATIVE BIOSYNTHETIC PROCESS	4.44065e-05	ACTIN POLYMERIZATION AND OR DEPOLYMERIZATION	5.04364e-06	MICROTUBULE ORGANIZING CENTER	1.46015e-29	ACTIVATION OF PROTEIN KINASE ACTIVITY	8.88171e-20
NEGATIVE REGULATION OF CELL PROLIFERATION	4.70087e-05	AMINO ACID AND DERIVATIVE METABOLIC PROCESS	5.05597e-06	HELICASE ACTIVITY	1.53521e-29	AMINO ACID DERIVATIVE BIOSYNTHETIC PROCESS	9.6203e-20
METAL ION TRANSPORT	4.77819e-05	REGULATION OF NEUROGENESIS	5.24576e-06	HUMORAL IMMUNE RESPONSE	1.64013e-29	ACTIN POLYMERIZATION AND OR DEPOLYMERIZATION	1.01448e-19
INDUCTION OF APOPTOSIS BY EXTRACELLULAR SIGNALS	5.1481e-05	INTERMEDIATE FILAMENT	5.61634e-06	AMINO ACID TRANSPORT	1.80869e-29	CELL CELL ADHESION	1.04762e-19
DOUBLE STRANDED DNA BINDING	6.02488e-05	INTERMEDIATE FILAMENT CYTOSKELETON	5.61634e-06	NUCLEOSOME ASSEMBLY	1.80869e-29	INTRA GOLGI VESICLE MEDIATED TRANSPORT	1.31373e-19
REGULATION OF HEART CONTRACTION	6.10821e-05	BIOGENIC AMINE METABOLIC PROCESS	5.70854e-06	LEARNING AND OR MEMORY	3.15369e-29	REGULATION OF HEART CONTRACTION	1.56994e-19
PROTEIN TYROSINE KINASE ACTIVITY	6.69682e-05	INDUCTION OF APOPTOSIS BY EXTRACELLULAR SIGNALS	5.81646e-06	CELL CYCLE PROCESS	4.06708e-29	DNA DEPENDENT ATPASE ACTIVITY	1.75589e-19
STEROID HORMONE RECEPTOR BINDING	6.69682e-05	NON MEMBRANE SPANNING PROTEIN TYROSINE KINASE ACTIVITY	6.56859e-06	AROMATIC COMPOUND METABOLIC PROCESS	4.37107e-29	DNA REPLICATION	1.9606e-19
TRICARBOXYLIC ACID CYCLE INTERMEDIATE METABOLIC PROCESS	7.09518e-05	AMINO ACID DERIVATIVE BIOSYNTHETIC PROCESS	7.64273e-06	ADENYL NUCLEOTIDE BINDING	4.59673e-29	PROTEIN DIMERIZATION ACTIVITY	1.9606e-19
HOMOPHILIC CELL ADHESION	7.75931e-05	INNATE IMMUNE RESPONSE	8.00451e-06	ADENYL RIBONUCLEOTIDE BINDING	4.59673e-29	CATION CHANNEL ACTIVITY	2.03117e-19
COFACTOR BINDING	7.84316e-05	OXYGEN BINDING	8.44652e-06	NEGATIVE REGULATION OF CATALYTIC ACTIVITY	4.92765e-29	CARBOXYLIC ACID TRANSPORT	2.11651e-19
CONTRACTILE FIBER PART	8.39334e-05	RAS PROTEIN SIGNAL TRANSDUCTION	8.62651e-06	RNA HELICASE ACTIVITY	5.43908e-29	ORGANIC ACID TRANSPORT	2.11651e-19
NUCLEOSOME ASSEMBLY	9.03463e-05	CYTOKINE ACTIVITY	9.21819e-06	TRANSCRIPTION COFACTOR ACTIVITY	6.38216e-29	OXIDOREDUCTASE ACTIVITY ACTING ON CH OH GROUP OF DONORS	2.21337e-19
MUSCLE CELL DIFFERENTIATION	9.13617e-05	SARCOMERE	9.2378e-06	PROTEIN AMINO ACID PHOSPHORYLATION	6.77268e-29	MICROTUBULE BASED PROCESS	2.29889e-19
VOLTAGE GATED CALCIUM CHANNEL COMPLEX	9.54884e-05	NUCLEAR REPLICATION FORK	9.69921e-06	CHROMATIN ASSEMBLY OR DISASSEMBLY	9.98523e-29	MAGNESIUM ION BINDING	2.40206e-19
TUBE MORPHOGENESIS	0.000103866	REGULATION OF GTPASE ACTIVITY	1.05517e-05	ION CHANNEL ACTIVITY	1.04232e-28	GTPASE REGULATOR ACTIVITY	2.66495e-19
METAL ION TRANSMEMBRANE TRANSPORTER ACTIVITY	0.000108002	VOLTAGE GATED CALCIUM CHANNEL COMPLEX	1.15002e-05	SUBSTRATE SPECIFIC CHANNEL ACTIVITY	1.04232e-28	MICROTUBULE ORGANIZING CENTER	2.79168e-19
DIGESTION	0.00011273	PROTEIN PROCESSING	1.26984e-05	ACTIN FILAMENT BUNDLE FORMATION	1.11512e-28	INDUCTION OF APOPTOSIS BY EXTRACELLULAR SIGNALS	2.83247e-19
ACTIN FILAMENT BASED MOVEMENT	0.000113294	PROTEIN TETRAMERIZATION	1.27972e-05	PHOSPHORIC ESTER HYDROLASE ACTIVITY	1.11512e-28	SEQUENCE SPECIFIC DNA BINDING	2.83247e-19
INTERLEUKIN 8 BIOSYNTHETIC PROCESS	0.000113294	TASTE RECEPTOR ACTIVITY	1.38025e-05	STEROID METABOLIC PROCESS	1.32018e-28	DOUBLE STRAND BREAK REPAIR	2.8364e-19
INTERLEUKIN 8 PRODUCTION	0.000113294	PHOSPHORIC MONOESTER HYDROLASE ACTIVITY	1.38438e-05	PROTEIN SERINE THREONINE KINASE ACTIVITY	1.43839e-28	ALDO KETO REDUCTASE ACTIVITY	2.95021e-19
CELL CORTEX PART	0.000117517	CHROMOSOME ORGANIZATION AND BIOGENESIS	1.44523e-05	OXYGEN AND REACTIVE OXYGEN SPECIES METABOLIC PROCESS	1.60217e-28	MICROTUBULE ORGANIZING CENTER PART	3.27391e-19
NEUROPEPTIDE HORMONE ACTIVITY	0.00012566	ENDODEOXYRIBONUCLEASE ACTIVITY	1.44523e-05	INTERCELLULAR JUNCTION	1.84913e-28	OXYGEN AND REACTIVE OXYGEN SPECIES METABOLIC PROCESS	3.37803e-19
COFACTOR CATABOLIC PROCESS	0.000127013	HORMONE METABOLIC PROCESS	1.55917e-05	REGULATION OF GENE SPECIFIC TRANSCRIPTION	2.1341e-28	INOSITOL OR PHOSPHATIDYLINOSITOL PHOSPHATASE ACTIVITY	3.38737e-19
SPINDLE	0.000127212	STRUCTURE SPECIFIC DNA BINDING	1.63916e-05	REGULATION OF PH	2.80164e-28	KINASE ACTIVITY	3.38737e-19
EMBRYONIC DEVELOPMENT	0.000140634	CYCLIC NUCLEOTIDE MEDIATED SIGNALING	1.79649e-05	EXTRINSIC TO MEMBRANE	2.93181e-28	CELL CYCLE GO 0007049	4.61117e-19
RESPONSE TO XENOBIOTIC STIMULUS	0.000145903	G PROTEIN SIGNALING COUPLED TO CYCLIC NUCLEOTIDE SECOND MESSENGER	1.79649e-05	PROTEIN BINDING BRIDGING	3.21764e-28	GLUTAMATE SIGNALING PATHWAY	4.76709e-19
RESPONSE TO NUTRIENT LEVELS	0.00014749	REGULATION OF CYCLIN DEPENDENT PROTEIN KINASE ACTIVITY	2.10399e-05	CYTOSKELETON	3.75006e-28	M PHASE OF MITOTIC CELL CYCLE	4.76709e-19
INTRA GOLGI VESICLE MEDIATED TRANSPORT	0.000149329	REGULATION OF CELLULAR COMPONENT ORGANIZATION AND BIOGENESIS	2.32707e-05	RNA POLYMERASE II TRANSCRIPTION FACTOR ACTIVITY	3.98032e-28	PROTEIN BINDING BRIDGING	5.28161e-19
G PROTEIN SIGNALING ADENYLATE CYCLASE INHIBITING PATHWAY	0.000157895	PROTEIN BINDING BRIDGING	2.38893e-05	REGULATION OF CYTOSKELETON ORGANIZATION AND BIOGENESIS	4.02603e-28	PROTEIN AMINO ACID PHOSPHORYLATION	5.36841e-19
MONOOXYGENASE ACTIVITY	0.000158473	PROTEIN N TERMINUS BINDING	2.40156e-05	CYTOKINESIS	4.10306e-28	PROTEIN KINASE ACTIVITY	5.60933e-19
NUCLEOTIDE SUGAR METABOLIC PROCESS	0.000158473	MITOTIC SPINDLE ORGANIZATION AND BIOGENESIS	2.43419e-05	EPIDERMIS DEVELOPMENT	4.30157e-28	STEROID BIOSYNTHETIC PROCESS	5.97755e-19
RESPONSE TO STEROID HORMONE STIMULUS	0.000163409	EXTRINSIC TO MEMBRANE	2.56497e-05	PYROPHOSPHATASE ACTIVITY	4.63085e-28	TRANSCRIPTION COACTIVATOR ACTIVITY	6.16667e-19
CELL CELL SIGNALING	0.000182393	G PROTEIN COUPLED RECEPTOR ACTIVITY	2.66164e-05	PERINUCLEAR REGION OF CYTOPLASM	4.77035e-28	OXIDOREDUCTASE ACTIVITY ACTING ON THE ALDEHYDE OR OXO GROUP OF DONORSNAD OR NADP AS ACCEPTOR	6.25994e-19
INTRAMOLECULAR OXIDOREDUCTASE ACTIVITY	0.000187086	MICROTUBULE ORGANIZING CENTER PART	2.72197e-05	HYDROLASE ACTIVITY ACTING ON ACID ANHYDRIDES	4.79143e-28	SECRETIN LIKE RECEPTOR ACTIVITY	6.25994e-19
CATION TRANSPORT	0.000190651	CAMP MEDIATED SIGNALING	2.7582e-05	PROTEIN TETRAMERIZATION	4.79143e-28	TRANSMEMBRANE RECEPTOR PROTEIN KINASE ACTIVITY	6.61028e-19
REGULATION OF PH	0.000195603	G PROTEIN SIGNALING COUPLED TO CAMP NUCLEOTIDE SECOND MESSENGER	2.7582e-05	MITOTIC CELL CYCLE	5.7105e-28	PROTEIN HETERODIMERIZATION ACTIVITY	7.45056e-19
RESPONSE TO CARBOHYDRATE STIMULUS	0.000201669	STRUCTURAL CONSTITUENT OF MUSCLE	2.84293e-05	NEGATIVE REGULATION OF TRANSFERASE ACTIVITY	6.07609e-28	MONOVALENT INORGANIC CATION HOMEOSTASIS	7.77929e-19
KINASE ACTIVATOR ACTIVITY	0.000235026	MITOCHONDRIAL TRANSPORT	2.87645e-05	CELLULAR PROTEIN CATABOLIC PROCESS	6.13307e-28	REGULATION OF CELL CYCLE	8.79287e-19
CONTRACTILE FIBER	0.000239018	RECEPTOR BINDING	3.04613e-05	NEGATIVE REGULATION OF TRANSCRIPTION FROM RNA POLYMERASE II PROMOTER	6.4284e-28	CHROMOSOME ORGANIZATION AND BIOGENESIS	9.32369e-19
MYOBLAST DIFFERENTIATION	0.000243082	REGULATION OF VIRAL REPRODUCTION	3.11361e-05	TRANSCRIPTION COREPRESSOR ACTIVITY	7.28085e-28	CELL CYCLE PHASE	9.53493e-19
PROTEOGLYCAN BIOSYNTHETIC PROCESS	0.000253777	MAGNESIUM ION BINDING	3.17646e-05	RECEPTOR BINDING	8.14898e-28	CARBOHYDRATE BIOSYNTHETIC PROCESS	9.7682e-19
GLUTAMATE RECEPTOR ACTIVITY	0.000259732	PROTEOGLYCAN BIOSYNTHETIC PROCESS	3.50825e-05	INTRA GOLGI VESICLE MEDIATED TRANSPORT	8.70078e-28	REGULATION OF JNK ACTIVITY	9.7682e-19
RECEPTOR BINDING	0.000269268	BASEMENT MEMBRANE	3.58863e-05	PHOSPHOPROTEIN PHOSPHATASE ACTIVITY	8.71758e-28	CHROMOSOME SEGREGATION	1.01933e-18
HORMONE METABOLIC PROCESS	0.00027331	TRANSMEMBRANE RECEPTOR PROTEIN TYROSINE KINASE ACTIVITY	3.58863e-05	SARCOMERE	1.01776e-27	ADENYL RIBONUCLEOTIDE BINDING	1.04747e-18
OXIDOREDUCTASE ACTIVITY ACTING ON THE ALDEHYDE OR OXO GROUP OF DONORS	0.000332383	NUCLEAR HORMONE RECEPTOR BINDING	3.59038e-05	NUCLEAR HORMONE RECEPTOR BINDING	1.33895e-27	AMINE TRANSPORT	1.04747e-18
MOLECULAR ADAPTOR ACTIVITY	0.000342525	STEROID BINDING	3.69562e-05	EMBRYONIC DEVELOPMENT	1.49737e-27	RESPONSE TO CARBOHYDRATE STIMULUS	1.08795e-18
VOLTAGE GATED CALCIUM CHANNEL ACTIVITY	0.000345859	BILE ACID METABOLIC PROCESS	3.82875e-05	ECTODERM DEVELOPMENT	1.71184e-27	CELLULAR PROTEIN CATABOLIC PROCESS	1.17272e-18
BEHAVIOR	0.000356627	REGULATION OF CYTOSKELETON ORGANIZATION AND BIOGENESIS	3.89272e-05	REGULATION OF RNA METABOLIC PROCESS	1.85009e-27	CYTOSOLIC PART	1.18381e-18
RHO GTPASE ACTIVATOR ACTIVITY	0.000356627	CHEMOKINE RECEPTOR BINDING	4.04792e-05	ORGANELLE ORGANIZATION AND BIOGENESIS	2.07614e-27	NEUROTRANSMITTER BINDING	1.18381e-18
SH3 SH2 ADAPTOR ACTIVITY	0.000376995	GLUTAMATE SIGNALING PATHWAY	4.24867e-05	RESPONSE TO ORGANIC SUBSTANCE	2.09948e-27	SMALL GTPASE REGULATOR ACTIVITY	1.19138e-18
RAS PROTEIN SIGNAL TRANSDUCTION	0.000384443	REGULATION OF CELL PROLIFERATION	4.24867e-05	REGULATION OF CELL PROLIFERATION	2.29693e-27	HELICASE ACTIVITY	1.27395e-18
VITAMIN TRANSPORT	0.00038582	GTPASE REGULATOR ACTIVITY	4.28756e-05	NITROGEN COMPOUND METABOLIC PROCESS	2.52061e-27	M PHASE	1.31833e-18
CAMP MEDIATED SIGNALING	0.000385983	AMINE RECEPTOR ACTIVITY	4.32155e-05	REGULATION OF TRANSCRIPTIONDNA DEPENDENT	2.7204e-27	RESPONSE TO ORGANIC SUBSTANCE	1.52735e-18
G PROTEIN SIGNALING COUPLED TO CAMP NUCLEOTIDE SECOND MESSENGER	0.000385983	CHROMOSOME SEGREGATION	4.32155e-05	RAS GTPASE ACTIVATOR ACTIVITY	2.79028e-27	PHOSPHOTRANSFERASE ACTIVITY ALCOHOL GROUP AS ACCEPTOR	1.55398e-18
ACTIVATION OF PROTEIN KINASE ACTIVITY	0.000407205	MICROTUBULE CYTOSKELETON ORGANIZATION AND BIOGENESIS	4.9753e-05	OXIDOREDUCTASE ACTIVITY	3.24971e-27	POLYSACCHARIDE BINDING	1.59963e-18
COENZYME BIOSYNTHETIC PROCESS	0.000407951	NUCLEOTIDE SUGAR METABOLIC PROCESS	4.9753e-05	ATPASE ACTIVITY	4.03564e-27	REGULATION OF GENE SPECIFIC TRANSCRIPTION	1.68788e-18
AMINO ACID TRANSPORT	0.000408481	RHO GTPASE ACTIVATOR ACTIVITY	5.08863e-05	COFACTOR BINDING	5.29515e-27	ION CHANNEL ACTIVITY	1.71149e-18
REGULATION OF JNK ACTIVITY	0.000413003	GLYCOSAMINOGLYCAN BINDING	5.09998e-05	GLUCOSE METABOLIC PROCESS	6.17687e-27	SUBSTRATE SPECIFIC CHANNEL ACTIVITY	1.83054e-18
CELLULAR CATION HOMEOSTASIS	0.000419295	CATION CHANNEL ACTIVITY	5.14197e-05	RESPONSE TO HORMONE STIMULUS	7.03732e-27	MUSCLE CELL DIFFERENTIATION	1.86837e-18
SMALL GTPASE MEDIATED SIGNAL TRANSDUCTION	0.000419762	AMINO ACID TRANSPORT	5.20409e-05	AMINE METABOLIC PROCESS	1.00155e-26	INTRAMOLECULAR OXIDOREDUCTASE ACTIVITY	1.94301e-18
CELL MIGRATION	0.00043106	PROTEIN SERINE THREONINE PHOSPHATASE COMPLEX	5.49322e-05	NUCLEOPLASM PART	1.00786e-26	VOLTAGE GATED CALCIUM CHANNEL COMPLEX	1.98202e-18
MYOFIBRIL	0.000439526	RESPONSE TO STEROID HORMONE STIMULUS	5.73483e-05	REGULATION OF TRANSCRIPTION	1.19039e-26	BIOGENIC AMINE METABOLIC PROCESS	2.31511e-18
CHEMOKINE RECEPTOR BINDING	0.000442766	STEROL BINDING	5.81898e-05	METAL ION TRANSMEMBRANE TRANSPORTER ACTIVITY	1.20181e-26	CELL CYCLE PROCESS	2.34198e-18
BILE ACID METABOLIC PROCESS	0.000490829	DNA DEPENDENT ATPASE ACTIVITY	6.1614e-05	TRANSCRIPTION FACTOR BINDING	1.20181e-26	POTASSIUM CHANNEL REGULATOR ACTIVITY	2.48057e-18
TRANSMEMBRANE RECEPTOR PROTEIN TYROSINE KINASE ACTIVITY	0.000493755	DOUBLE STRAND BREAK REPAIR	6.28206e-05	REGULATION OF NUCLEOBASENUCLEOSIDENUCLEOTIDE AND NUCLEIC ACID METABOLIC PROCESS	1.22289e-26	REGULATION OF SECRETION	2.62469e-18
INTERCELLULAR JUNCTION ASSEMBLY AND MAINTENANCE	0.000498191	GLUCOSE CATABOLIC PROCESS	6.41294e-05	CARBOXYLIC ACID TRANSPORT	1.47663e-26	NON MEMBRANE SPANNING PROTEIN TYROSINE KINASE ACTIVITY	2.8371e-18
PEPTIDE RECEPTOR ACTIVITY	0.000509678	REGULATION OF BLOOD PRESSURE	7.09099e-05	ORGANIC ACID TRANSPORT	1.47663e-26	HORMONE BINDING	2.8805e-18
NEGATIVE REGULATION OF CELLULAR COMPONENT ORGANIZATION AND BIOGENESIS	0.000544052	ELECTRON CARRIER ACTIVITY	7.31562e-05	OXIDOREDUCTASE ACTIVITY ACTING ON CH OH GROUP OF DONORS	1.47663e-26	KINETOCHORE	3.1118e-18
PHOSPHORIC MONOESTER HYDROLASE ACTIVITY	0.000544052	CARBOHYDRATE KINASE ACTIVITY	7.54057e-05	NEGATIVE REGULATION OF TRANSCRIPTION	1.5319e-26	RECEPTOR BINDING	3.18073e-18
SECRETORY GRANULE	0.000557336	CORTICAL ACTIN CYTOSKELETON	7.82635e-05	GOLGI APPARATUS	1.64151e-26	TRANSCRIPTION COFACTOR ACTIVITY	3.23046e-18
INNATE IMMUNE RESPONSE	0.000562066	ACTIVATION OF JNK ACTIVITY	8.03884e-05	NEGATIVE REGULATION OF CELLULAR PROCESS	1.91313e-26	TRANSFERASE ACTIVITY TRANSFERRING PHOSPHORUS CONTAINING GROUPS	3.30555e-18
INOSITOL OR PHOSPHATIDYLINOSITOL KINASE ACTIVITY	0.000577832	REGULATION OF PROTEIN STABILITY	8.03884e-05	MYOFIBRIL	2.50987e-26	DNA INTEGRITY CHECKPOINT	3.34263e-18
ORGANELLE OUTER MEMBRANE	0.000626076	KINETOCHORE	8.24787e-05	SULFOTRANSFERASE ACTIVITY	2.52286e-26	GROWTH FACTOR ACTIVITY	3.5008e-18
OUTER MEMBRANE	0.000626076	CHROMATIN REMODELING COMPLEX	8.43101e-05	POST TRANSLATIONAL PROTEIN MODIFICATION	2.7214e-26	CENTRAL NERVOUS SYSTEM DEVELOPMENT	3.53783e-18
REGULATION OF CELL PROLIFERATION	0.000635707	SYNAPTIC TRANSMISSION	8.69445e-05	ELECTRON CARRIER ACTIVITY	2.97892e-26	VOLTAGE GATED CALCIUM CHANNEL ACTIVITY	4.0458e-18
MICROTUBULE BASED PROCESS	0.000642729	HISTONE DEACETYLASE BINDING	8.70236e-05	GTPASE REGULATOR ACTIVITY	2.97892e-26	ACTIN FILAMENT BUNDLE FORMATION	4.13966e-18
OXIDOREDUCTASE ACTIVITY ACTING ON THE ALDEHYDE OR OXO GROUP OF DONORSNAD OR NADP AS ACCEPTOR	0.000642729	LIGAND GATED CHANNEL ACTIVITY	8.85429e-05	TRANSCRIPTION COACTIVATOR ACTIVITY	3.5706e-26	REGULATION OF BLOOD PRESSURE	5.56648e-18
POSITIVE REGULATION OF JNK ACTIVITY	0.000666677	DEOXYRIBONUCLEASE ACTIVITY	8.96513e-05	ENDOSOME	3.69587e-26	MITOSIS	5.75507e-18
NUCLEAR REPLICATION FORK	0.000763775	OXIDOREDUCTASE ACTIVITY GO 0016705	9.00582e-05	PROTEIN N TERMINUS BINDING	4.37213e-26	NUCLEASE ACTIVITY	5.86474e-18
REGULATION OF CYCLIN DEPENDENT PROTEIN KINASE ACTIVITY	0.00080937	TRANSMISSION OF NERVE IMPULSE	9.00582e-05	NEUROPEPTIDE SIGNALING PATHWAY	4.37607e-26	VOLTAGE GATED CHANNEL ACTIVITY	6.01996e-18
TRANSMEMBRANE RECEPTOR ACTIVITY	0.000813849	REGULATION OF PH	9.13305e-05	CELL PROLIFERATION GO 0008283	4.60344e-26	TRANSCRIPTION ACTIVATOR ACTIVITY	6.4474e-18
ACTIVATION OF JNK ACTIVITY	0.000816815	PROTEIN HETERODIMERIZATION ACTIVITY	9.18542e-05	HETEROPHILIC CELL ADHESION	5.62655e-26	BILE ACID METABOLIC PROCESS	7.58631e-18
CATION HOMEOSTASIS	0.000830079	SECOND MESSENGER MEDIATED SIGNALING	9.2164e-05	NEGATIVE REGULATION OF BIOLOGICAL PROCESS	5.62958e-26	CENTROSOME	7.58631e-18
INTEGRIN COMPLEX	0.000845458	MALE GONAD DEVELOPMENT	9.34743e-05	NEGATIVE REGULATION OF CYTOSKELETON ORGANIZATION AND BIOGENESIS	5.73883e-26	NEUROTRANSMITTER RECEPTOR ACTIVITY	7.77346e-18
REGULATION OF NEUROTRANSMITTER LEVELS	0.000845458	CELLULAR CARBOHYDRATE METABOLIC PROCESS	9.82959e-05	DNA DEPENDENT DNA REPLICATION	5.86841e-26	ADP BINDING	7.88303e-18
RAS GTPASE ACTIVATOR ACTIVITY	0.000845816	COENZYME BIOSYNTHETIC PROCESS	9.82959e-05	NEGATIVE REGULATION OF NUCLEOBASENUCLEOSIDENUCLEOTIDE AND NUCLEIC ACID METABOLIC PROCESS	6.05757e-26	REGULATION OF TRANSCRIPTION FROM RNA POLYMERASE II PROMOTER	8.01621e-18
RUFFLE	0.000855996	TIGHT JUNCTION	0.000101676	GOLGI VESICLE TRANSPORT	8.01568e-26	CYTOSKELETAL PART	8.08414e-18
REGULATION OF NEUROGENESIS	0.000857264	PROTEIN AMINO ACID AUTOPHOSPHORYLATION	0.000102844	PROTEIN CATABOLIC PROCESS	8.32774e-26	METAL ION TRANSPORT	8.45089e-18
AMINE METABOLIC PROCESS	0.000861127	PROTEIN AUTOPROCESSING	0.000102844	NEGATIVE REGULATION OF CELLULAR METABOLIC PROCESS	8.84032e-26	CHROMOSOME	8.79057e-18
ADENYL NUCLEOTIDE BINDING	0.000869982	NUCLEASE ACTIVITY	0.00010491	NEGATIVE REGULATION OF METABOLIC PROCESS	9.58828e-26	PROTEIN HOMODIMERIZATION ACTIVITY	8.79057e-18
NUCLEOTIDE KINASE ACTIVITY	0.00087187	OXYGEN AND REACTIVE OXYGEN SPECIES METABOLIC PROCESS	0.000107295	NON MEMBRANE SPANNING PROTEIN TYROSINE KINASE ACTIVITY	9.89565e-26	RESPONSE TO ENDOGENOUS STIMULUS	9.39913e-18
GTPASE ACTIVATOR ACTIVITY	0.000930807	PROTEOGLYCAN METABOLIC PROCESS	0.000107625	CHROMOSOME	1.20596e-25	UBIQUITIN LIGASE COMPLEX	9.87947e-18
ACTIVATION OF IMMUNE RESPONSE	0.000940439	RESPONSE TO DRUG	0.000108231	PROTEIN HETERODIMERIZATION ACTIVITY	1.26328e-25	PHOSPHORIC MONOESTER HYDROLASE ACTIVITY	1.02797e-17
MALE GONAD DEVELOPMENT	0.000947135	NUCLEAR CHROMOSOME PART	0.000110444	GLYCOPROTEIN CATABOLIC PROCESS	1.30341e-25	IMMUNE RESPONSE	1.04334e-17
FEEDING BEHAVIOR	0.000957551	PERIPHERAL NERVOUS SYSTEM DEVELOPMENT	0.000113298	TRANSCRIPTION FROM RNA POLYMERASE II PROMOTER	1.31074e-25	SMALL GTPASE MEDIATED SIGNAL TRANSDUCTION	1.04334e-17
MITOCHONDRIAL OUTER MEMBRANE	0.000957551	TRANSCRIPTION COACTIVATOR ACTIVITY	0.000113938	INTRACELLULAR NON MEMBRANE BOUND ORGANELLE	1.46523e-25	PHOSPHORYLATION	1.0734e-17
SPINDLE ORGANIZATION AND BIOGENESIS	0.000993432	SMALL GTPASE REGULATOR ACTIVITY	0.000121696	NON MEMBRANE BOUND ORGANELLE	1.46523e-25	REGULATION OF CELL PROLIFERATION	1.0734e-17
NEGATIVE REGULATION OF CYTOSKELETON ORGANIZATION AND BIOGENESIS	0.00099623	RESPONSE TO XENOBIOTIC STIMULUS	0.000122432	ION BINDING	1.83003e-25	ACTIN BINDING	1.13149e-17
PROTEIN N TERMINUS BINDING	0.00099775	MYOFIBRIL	0.000126329	ATP BINDING	1.85349e-25	KINASE REGULATOR ACTIVITY	1.25339e-17
RESPONSE TO BACTERIUM	0.00111658	NEGATIVE REGULATION OF TRANSCRIPTION FROM RNA POLYMERASE II PROMOTER	0.000126329	ADHERENS JUNCTION	1.88682e-25	MITOTIC CELL CYCLE CHECKPOINT	1.46604e-17
RESPONSE TO NUTRIENT	0.00117808	VOLTAGE GATED CALCIUM CHANNEL ACTIVITY	0.000126329	ORGANIC ACID METABOLIC PROCESS	2.06397e-25	GOLGI MEMBRANE	1.55443e-17
NON MEMBRANE SPANNING PROTEIN TYROSINE KINASE ACTIVITY	0.00125594	RUFFLE	0.000127033	KINETOCHORE	2.11457e-25	STEROID BINDING	1.57045e-17
ADENYL RIBONUCLEOTIDE BINDING	0.00131874	CHROMATIN ASSEMBLY OR DISASSEMBLY	0.000137503	DEFENSE RESPONSE TO VIRUS	2.12613e-25	REGULATION OF NEUROTRANSMITTER LEVELS	1.60224e-17
CELLULAR CARBOHYDRATE METABOLIC PROCESS	0.00131874	RHODOPSIN LIKE RECEPTOR ACTIVITY	0.000142521	ESTABLISHMENT AND OR MAINTENANCE OF CHROMATIN ARCHITECTURE	2.61298e-25	ATP BINDING	1.64969e-17
METALLOENDOPEPTIDASE ACTIVITY	0.00131874	HORMONE RECEPTOR BINDING	0.000142676	RNA DEPENDENT ATPASE ACTIVITY	2.95676e-25	DNA HELICASE ACTIVITY	1.67112e-17
MONOVALENT INORGANIC CATION TRANSPORT	0.00131874	REGULATION OF SECRETION	0.000142676	LIPID CATABOLIC PROCESS	3.57642e-25	PURINE NUCLEOTIDE BINDING	1.74198e-17
MICROTUBULE CYTOSKELETON	0.00133301	AMINE BINDING	0.000143181	REGULATION OF CELLULAR METABOLIC PROCESS	4.06552e-25	PROTEIN KINASE REGULATOR ACTIVITY	1.76017e-17
TRANSCRIPTION COACTIVATOR ACTIVITY	0.00134671	MONOCARBOXYLIC ACID METABOLIC PROCESS	0.000145236	CELLULAR LOCALIZATION	4.38782e-25	GLUCOSE CATABOLIC PROCESS	1.83994e-17
HORMONE BINDING	0.00135529	DNA INTEGRITY CHECKPOINT	0.000147089	REGULATION OF METABOLIC PROCESS	4.55163e-25	REGULATION OF CHROMOSOME ORGANIZATION AND BIOGENESIS	1.93284e-17
REGULATION OF INTERFERON GAMMA BIOSYNTHETIC PROCESS	0.00137762	GOLGI MEMBRANE	0.000147089	BASEMENT MEMBRANE	5.64537e-25	SODIUM ION TRANSPORT	2.02626e-17
REGULATION OF GTPASE ACTIVITY	0.00139316	OXIDOREDUCTASE ACTIVITY ACTING ON CH OH GROUP OF DONORS	0.000151051	RNA BIOSYNTHETIC PROCESS	8.07799e-25	AMINE METABOLIC PROCESS	2.05968e-17
CELL CYCLE CHECKPOINT GO 0000075	0.00143388	CELL CELL SIGNALING	0.000156716	CYTOSOL	8.37403e-25	PROTEIN CATABOLIC PROCESS	2.15853e-17
OXIDOREDUCTASE ACTIVITY GO 0016706	0.00143417	KINASE REGULATOR ACTIVITY	0.000168366	TRANSCRIPTION DNA DEPENDENT	8.65267e-25	CONTRACTILE FIBER PART	2.27597e-17
NITROGEN COMPOUND METABOLIC PROCESS	0.00144373	MICROTUBULE ORGANIZING CENTER	0.000170549	PROTEIN DIMERIZATION ACTIVITY	8.87773e-25	PROTEIN SERINE THREONINE KINASE ACTIVITY	2.2906e-17
MAGNESIUM ION BINDING	0.00147867	AMINOPEPTIDASE ACTIVITY	0.000170932	PHOSPHORYLATION	9.05804e-25	SYSTEM PROCESS	2.48428e-17
REGULATION OF CELL CYCLE	0.00148546	CELLULAR RESPONSE TO STIMULUS	0.000171262	TRANSCRIPTION REPRESSOR ACTIVITY	1.02032e-24	ACTIN CYTOSKELETON	2.52346e-17
NITROGEN COMPOUND BIOSYNTHETIC PROCESS	0.001511	PROTEIN KINASE ACTIVITY	0.000172241	OXIDOREDUCTASE ACTIVITY GO 0016705	1.10184e-24	TRANSCRIPTION FROM RNA POLYMERASE II PROMOTER	2.5855e-17
CHROMATIN ASSEMBLY	0.00162128	SERINE HYDROLASE ACTIVITY	0.000172671	MONOCARBOXYLIC ACID METABOLIC PROCESS	1.13467e-24	MITOCHONDRIAL TRANSPORT	2.68409e-17
CELL CORTEX	0.00166889	SERINE TYPE PEPTIDASE ACTIVITY	0.000172671	NUCLEOPLASM	1.33872e-24	ELECTRON CARRIER ACTIVITY	2.76441e-17
ACUTE INFLAMMATORY RESPONSE	0.00182189	GROWTH FACTOR ACTIVITY	0.000173582	CARBOXYLIC ACID METABOLIC PROCESS	1.3457e-24	AMINO ACID AND DERIVATIVE METABOLIC PROCESS	2.8524e-17
CYTOSKELETAL PART	0.00182189	DIGESTION	0.000176688	AMINO ACID AND DERIVATIVE METABOLIC PROCESS	1.41185e-24	REGULATION OF GENE EXPRESSION EPIGENETIC	2.8524e-17
LIPID CATABOLIC PROCESS	0.00182189	KINASE ACTIVATOR ACTIVITY	0.000186221	CHROMOSOMAL PART	1.52824e-24	REGULATION OF CELLULAR COMPONENT ORGANIZATION AND BIOGENESIS	3.37032e-17
SEQUENCE SPECIFIC DNA BINDING	0.00182872	REGULATION OF CELL CYCLE	0.000186836	HORMONE RECEPTOR BINDING	1.7899e-24	CARBOHYDRATE KINASE ACTIVITY	3.54022e-17
POTASSIUM ION TRANSPORT	0.00189157	CELL CYCLE GO 0007049	0.000187448	CONDENSED CHROMOSOME	2.23732e-24	RNA HELICASE ACTIVITY	3.55853e-17
CORTICAL CYTOSKELETON	0.00196006	FEEDING BEHAVIOR	0.000188341	ATP DEPENDENT HELICASE ACTIVITY	2.25256e-24	CYTOKINE ACTIVITY	3.80754e-17
MITOTIC CELL CYCLE CHECKPOINT	0.00208449	NUCLEAR UBIQUITIN LIGASE COMPLEX	0.000192831	RECEPTOR COMPLEX	2.64602e-24	HEMATOPOIETIN INTERFERON CLASSD200 DOMAIN CYTOKINE RECEPTOR BINDING	3.83754e-17
CARBOXYLIC ACID TRANSPORT	0.00209245	SEROTONIN RECEPTOR ACTIVITY	0.00019305	REGULATION OF GENE EXPRESSION	2.67344e-24	EXTRACELLULAR MATRIX	4.13347e-17
ORGANIC ACID TRANSPORT	0.00209245	ADENYL NUCLEOTIDE BINDING	0.000197144	MEMBRANE FRACTION	2.96071e-24	PROTEINACEOUS EXTRACELLULAR MATRIX	4.13347e-17
ANION TRANSMEMBRANE TRANSPORTER ACTIVITY	0.00214179	ADP BINDING	0.000197144	MULTICELLULAR ORGANISMAL DEVELOPMENT	3.12144e-24	REGULATION OF DEFENSE RESPONSE	4.13347e-17
EXTRACELLULAR REGION PART	0.00214179	G PROTEIN COUPLED RECEPTOR PROTEIN SIGNALING PATHWAY	0.000197144	TRANSCRIPTION	3.27705e-24	REGULATION OF RNA METABOLIC PROCESS	4.19917e-17
NICOTINIC ACETYLCHOLINE ACTIVATED CATION SELECTIVE CHANNEL ACTIVITY	0.00214179	CHEMOKINE ACTIVITY	0.000201331	PROTEIN OLIGOMERIZATION	3.35157e-24	REGULATION OF IMMUNE EFFECTOR PROCESS	4.37956e-17
NICOTINIC ACETYLCHOLINE GATED RECEPTOR CHANNEL COMPLEX	0.00214179	REGULATION OF CELL CELL ADHESION	0.000201331	NEUROTRANSMITTER BINDING	3.44296e-24	NUCLEAR CHROMOSOME PART	4.58717e-17
SINGLE STRANDED DNA BINDING	0.00214179	POST GOLGI VESICLE MEDIATED TRANSPORT	0.000205104	RESPONSE TO ENDOGENOUS STIMULUS	3.44296e-24	SENSORY ORGAN DEVELOPMENT	4.85821e-17
TRANSMEMBRANE TRANSPORTER ACTIVITY	0.00214793	KINASE ACTIVITY	0.000211	REGULATION OF SECRETION	3.51128e-24	MITOTIC CELL CYCLE	4.8838e-17
SEROTONIN RECEPTOR ACTIVITY	0.00218635	ACUTE INFLAMMATORY RESPONSE	0.000211786	RESPONSE TO NUTRIENT	3.56356e-24	NEUROGENESIS	4.98732e-17
EXTRACELLULAR SPACE	0.00225929	CARBOXYLIC ACID TRANSPORT	0.000211786	CALCIUM ION TRANSPORT	3.70599e-24	SPERMATID DIFFERENTIATION	5.18069e-17
PROTEIN BINDING BRIDGING	0.00229685	DNA REPLICATION	0.000211786	DI TRI VALENT INORGANIC CATION TRANSPORT	3.70599e-24	REGULATION OF TRANSCRIPTIONDNA DEPENDENT	5.4725e-17
OXYGEN AND REACTIVE OXYGEN SPECIES METABOLIC PROCESS	0.0023345	INSULIN LIKE GROWTH FACTOR RECEPTOR BINDING	0.000211786	DNA METABOLIC PROCESS	3.85565e-24	POSITIVE REGULATION OF JNK ACTIVITY	5.87e-17
POSITIVE REGULATION OF CYTOKINE BIOSYNTHETIC PROCESS	0.0023345	ORGANIC ACID TRANSPORT	0.000211786	LIPOPROTEIN BINDING	3.85565e-24	PROTEIN COMPLEX BINDING	5.96224e-17
SENSORY PERCEPTION OF CHEMICAL STIMULUS	0.00234866	TRANSMEMBRANE RECEPTOR PROTEIN KINASE ACTIVITY	0.000211786	NEGATIVE REGULATION OF RNA METABOLIC PROCESS	3.85565e-24	VOLTAGE GATED CATION CHANNEL ACTIVITY	6.50479e-17
STRUCTURE SPECIFIC DNA BINDING	0.00239364	MITOTIC CELL CYCLE CHECKPOINT	0.000212208	NEGATIVE REGULATION OF TRANSCRIPTION DNA DEPENDENT	3.85565e-24	NUCLEOTIDE BINDING	6.54521e-17
RESPONSE TO EXTRACELLULAR STIMULUS	0.00242859	GATED CHANNEL ACTIVITY	0.000214925	OXIDOREDUCTASE ACTIVITY GO 0016616	3.90689e-24	CHROMOSOMAL PART	7.49471e-17
MICROTUBULE MOTOR ACTIVITY	0.00245972	BASAL LAMINA	0.000218199	DNA DIRECTED RNA POLYMERASEII HOLOENZYME	4.40633e-24	GOLGI APPARATUS	7.90198e-17
REGULATION OF SECRETION	0.00247521	RNA HELICASE ACTIVITY	0.000222819	FEMALE PREGNANCY	4.59745e-24	NITROGEN COMPOUND METABOLIC PROCESS	7.92071e-17
BASEMENT MEMBRANE	0.00252781	POLYSACCHARIDE BINDING	0.000230174	PROTEIN C TERMINUS BINDING	5.66528e-24	ENZYME BINDING	8.05512e-17
CHROMOSOME ORGANIZATION AND BIOGENESIS	0.00253157	TRANSCRIPTION COFACTOR ACTIVITY	0.000230174	REGULATION OF HEART CONTRACTION	5.66528e-24	SARCOMERE	8.22244e-17
INTERLEUKIN 2 PRODUCTION	0.00253157	RAS GTPASE ACTIVATOR ACTIVITY	0.00023158	LOW DENSITY LIPOPROTEIN BINDING	5.91602e-24	POSITIVE REGULATION OF DEFENSE RESPONSE	8.33627e-17
CELLULAR HOMEOSTASIS	0.00253908	CALCIUM INDEPENDENT CELL CELL ADHESION	0.000231584	JAK STAT CASCADE	6.09293e-24	NEUROLOGICAL SYSTEM PROCESS	8.41299e-17
XENOBIOTIC METABOLIC PROCESS	0.00254328	POSITIVE REGULATION OF DEFENSE RESPONSE	0.00023296	NERVOUS SYSTEM DEVELOPMENT	6.11722e-24	POST TRANSLATIONAL PROTEIN MODIFICATION	8.55486e-17
MICROTUBULE CYTOSKELETON ORGANIZATION AND BIOGENESIS	0.00263162	CELL JUNCTION	0.000237576	GENERATION OF A SIGNAL INVOLVED IN CELL CELL SIGNALING	6.50366e-24	MONOCARBOXYLIC ACID METABOLIC PROCESS	8.68644e-17
AMINO ACID AND DERIVATIVE METABOLIC PROCESS	0.00286032	NITROGEN COMPOUND BIOSYNTHETIC PROCESS	0.000237576	VOLTAGE GATED CALCIUM CHANNEL ACTIVITY	6.53132e-24	NEGATIVE REGULATION OF TRANSCRIPTION FROM RNA POLYMERASE II PROMOTER	8.68644e-17
SUBSTRATE SPECIFIC TRANSMEMBRANE TRANSPORTER ACTIVITY	0.00286978	SINGLE STRANDED DNA BINDING	0.000243056	VOLTAGE GATED CALCIUM CHANNEL COMPLEX	6.53132e-24	RNA BIOSYNTHETIC PROCESS	8.68644e-17
DAMAGED DNA BINDING	0.00299392	CELL CELL ADHESION	0.000246813	MUSCLE CELL DIFFERENTIATION	7.33837e-24	IDENTICAL PROTEIN BINDING	9.17363e-17
REGULATION OF ACTIN FILAMENT LENGTH	0.00307401	GLUTATHIONE TRANSFERASE ACTIVITY	0.00024918	GTPASE ACTIVITY	1.0502e-23	ORGANELLE ORGANIZATION AND BIOGENESIS	9.17363e-17
REGULATION OF CELLULAR COMPONENT SIZE	0.00307401	MICROTUBULE CYTOSKELETON	0.00025665	OXIDOREDUCTASE ACTIVITY ACTING ON SULFUR GROUP OF DONORS	1.05263e-23	NUCLEAR REPLICATION FORK	9.22583e-17
BIOGENIC AMINE METABOLIC PROCESS	0.00309374	POSITIVE REGULATION OF JNK ACTIVITY	0.000264592	CYTOPLASMIC PART	1.10183e-23	TRANSCRIPTION DNA DEPENDENT	9.22583e-17
ELECTRON CARRIER ACTIVITY	0.00309733	SYSTEM PROCESS	0.000264592	CYTOSKELETAL PROTEIN BINDING	1.16688e-23	REGULATION OF CELLULAR PH	9.9392e-17
SUGAR BINDING	0.00309733	TRANSFERASE ACTIVITY TRANSFERRING PHOSPHORUS CONTAINING GROUPS	0.000265533	NUCLEOBASENUCLEOSIDENUCLEOTIDE AND NUCLEIC ACID METABOLIC PROCESS	1.24397e-23	ENDONUCLEASE ACTIVITY	1.11887e-16
DEAMINASE ACTIVITY	0.00317708	REGULATION OF HEART CONTRACTION	0.000271893	RESPONSE TO DNA DAMAGE STIMULUS	1.31069e-23	AMINOPEPTIDASE ACTIVITY	1.15904e-16
MICROTUBULE	0.00328491	PROTEIN KINASE REGULATOR ACTIVITY	0.000274322	PROTEIN MODIFICATION PROCESS	1.36506e-23	METAL ION TRANSMEMBRANE TRANSPORTER ACTIVITY	1.1668e-16
TIGHT JUNCTION	0.00338758	SENSORY ORGAN DEVELOPMENT	0.000276396	GOLGI MEMBRANE	1.41092e-23	MUSCLE DEVELOPMENT	1.32625e-16
CHEMOKINE ACTIVITY	0.00349012	ION TRANSPORT	0.000279895	TRANSITION METAL ION BINDING	1.48759e-23	SPINDLE ORGANIZATION AND BIOGENESIS	1.38638e-16
ATP BINDING	0.00353177	ADENYL RIBONUCLEOTIDE BINDING	0.000298685	PURINE NUCLEOTIDE BINDING	1.56861e-23	LIPID KINASE ACTIVITY	1.40442e-16
MITOTIC SPINDLE ORGANIZATION AND BIOGENESIS	0.00358833	CYTOSKELETON ORGANIZATION AND BIOGENESIS	0.000304311	PURINE RIBONUCLEOTIDE BINDING	1.56861e-23	CHEMOKINE RECEPTOR BINDING	1.43806e-16
REGULATION OF ACTIN POLYMERIZATION AND OR DEPOLYMERIZATION	0.00358833	NEGATIVE REGULATION OF MAP KINASE ACTIVITY	0.000304311	CONTRACTILE FIBER PART	1.71036e-23	PROTEIN AMINO ACID AUTOPHOSPHORYLATION	1.4779e-16
REGULATION OF MITOSIS	0.00363191	SUBSTRATE SPECIFIC CHANNEL ACTIVITY	0.000304311	PROTEIN PROCESSING	1.76507e-23	PROTEIN AUTOPROCESSING	1.4779e-16
PHOSPHOLIPID METABOLIC PROCESS	0.00373196	EXTRACELLULAR MATRIX STRUCTURAL CONSTITUENT	0.000306482	TRANSCRIPTION FACTOR ACTIVITY	1.82182e-23	NERVOUS SYSTEM DEVELOPMENT	1.52032e-16
KINASE REGULATOR ACTIVITY	0.00395646	NEUROLOGICAL SYSTEM PROCESS	0.000306482	CELLULAR MACROMOLECULE CATABOLIC PROCESS	2.1827e-23	TRANSCRIPTION REPRESSOR ACTIVITY	1.6113e-16
RIBONUCLEOTIDE METABOLIC PROCESS	0.00431007	ORGANIC ACID METABOLIC PROCESS	0.000306482	CENTROSOME	2.1827e-23	SYNAPTIC TRANSMISSION	1.62799e-16
KINETOCHORE	0.0043196	OXIDOREDUCTASE ACTIVITY GO 0016616	0.000306482	ENZYME LINKED RECEPTOR PROTEIN SIGNALING PATHWAY	2.35176e-23	TRANSMISSION OF NERVE IMPULSE	1.70246e-16
NEGATIVE REGULATION OF CYTOKINE BIOSYNTHETIC PROCESS	0.0043315	SERINE TYPE ENDOPEPTIDASE ACTIVITY	0.000318173	EXTRACELLULAR MATRIX	2.41835e-23	ION TRANSPORT	1.86841e-16
MONOVALENT INORGANIC CATION HOMEOSTASIS	0.00435794	OXIDOREDUCTASE ACTIVITY	0.000320747	PROTEINACEOUS EXTRACELLULAR MATRIX	2.41835e-23	PURINE RIBONUCLEOTIDE BINDING	1.89944e-16
ION TRANSMEMBRANE TRANSPORTER ACTIVITY	0.00470453	ORGANIC ANION TRANSMEMBRANE TRANSPORTER ACTIVITY	0.000334776	TRANSFERASE ACTIVITY TRANSFERRING SULFUR CONTAINING GROUPS	2.50297e-23	REGULATION OF TRANSFERASE ACTIVITY	1.905e-16
CELL CYCLE GO 0007049	0.00478604	PHOSPHOTRANSFERASE ACTIVITY ALCOHOL GROUP AS ACCEPTOR	0.000334776	REGULATION OF HORMONE SECRETION	3.00522e-23	TRANSCRIPTION COREPRESSOR ACTIVITY	2.11899e-16
TRANSPORT VESICLE	0.00484258	RESPONSE TO NUTRIENT LEVELS	0.000334776	ENZYME ACTIVATOR ACTIVITY	3.00837e-23	CYTOSKELETON ORGANIZATION AND BIOGENESIS	2.14206e-16
EXTRINSIC TO MEMBRANE	0.00488404	METAL ION TRANSPORT	0.000340656	CAMP MEDIATED SIGNALING	3.59057e-23	CYTOSKELETON	2.31947e-16
VOLTAGE GATED CATION CHANNEL ACTIVITY	0.00492941	POSITIVE REGULATION OF SECRETION	0.000344905	G PROTEIN SIGNALING COUPLED TO CAMP NUCLEOTIDE SECOND MESSENGER	3.59057e-23	OXIDOREDUCTASE ACTIVITY	2.42515e-16
RESPONSE TO ORGANIC SUBSTANCE	0.00494647	HORMONE BINDING	0.000345172	AMINE RECEPTOR ACTIVITY	3.81179e-23	EXTRINSIC TO MEMBRANE	2.51955e-16
POSITIVE REGULATION OF CELL CYCLE	0.00508539	DNA PACKAGING	0.000360267	BIOPOLYMER MODIFICATION	3.89134e-23	CONDENSED CHROMOSOME	2.52432e-16
SUBSTRATE SPECIFIC TRANSPORTER ACTIVITY	0.00508539	REGULATION OF JNK ACTIVITY	0.000360267	RESPONSE TO NUTRIENT LEVELS	4.14454e-23	AMINO ACID TRANSMEMBRANE TRANSPORTER ACTIVITY	2.64403e-16
NUCLEAR CHROMOSOME PART	0.00532289	ALDO KETO REDUCTASE ACTIVITY	0.000368808	CYCLIC NUCLEOTIDE MEDIATED SIGNALING	4.28293e-23	CYTOPLASM ORGANIZATION AND BIOGENESIS	2.77074e-16
ACTIN CYTOSKELETON	0.00533342	PATTERN BINDING	0.000375371	G PROTEIN SIGNALING COUPLED TO CYCLIC NUCLEOTIDE SECOND MESSENGER	4.28293e-23	GAMETE GENERATION	2.80565e-16
ACETYLCHOLINE BINDING	0.00551929	REPLICATION FORK	0.000376513	INTRACELLULAR ORGANELLE PART	4.34758e-23	REGULATION OF TRANSCRIPTION	2.83637e-16
N TERMINAL PROTEIN AMINO ACID MODIFICATION	0.00551929	REGULATION OF TRANSCRIPTION FROM RNA POLYMERASE II PROMOTER	0.000396238	COENZYME METABOLIC PROCESS	4.63387e-23	DNA METABOLIC PROCESS	2.91372e-16
PROTEOGLYCAN METABOLIC PROCESS	0.00551929	POSITIVE REGULATION OF DNA METABOLIC PROCESS	0.000400981	MITOCHONDRIAL TRANSPORT	4.63387e-23	TRANSCRIPTION FACTOR BINDING	2.91372e-16
CYTOPLASM ORGANIZATION AND BIOGENESIS	0.00562362	HETEROCYCLE METABOLIC PROCESS	0.000408165	RNA METABOLIC PROCESS	4.88541e-23	SKELETAL MUSCLE DEVELOPMENT	2.96251e-16
POSITIVE REGULATION OF RESPONSE TO STIMULUS	0.00562362	LIPID BINDING	0.00040955	TRANSCRIPTION FACTOR COMPLEX	5.01048e-23	RESPONSE TO UV	3.12991e-16
MONOCARBOXYLIC ACID METABOLIC PROCESS	0.00574464	HELICASE ACTIVITY	0.000412214	DOUBLE STRAND BREAK REPAIR	5.22129e-23	PATTERN BINDING	3.14241e-16
EPIDERMIS DEVELOPMENT	0.00584267	PROTEIN OLIGOMERIZATION	0.000412214	APICAL JUNCTION COMPLEX	5.25578e-23	CATION TRANSPORT	3.2031e-16
PROTEIN SERINE THREONINE TYROSINE KINASE ACTIVITY	0.00591665	PROTEIN DIMERIZATION ACTIVITY	0.000414573	APICOLATERAL PLASMA MEMBRANE	5.25578e-23	ORGANELLE OUTER MEMBRANE	3.32305e-16
REGULATION OF IMMUNE EFFECTOR PROCESS	0.00598185	CENTROSOME	0.000421591	TIGHT JUNCTION	5.25578e-23	OUTER MEMBRANE	3.32305e-16
M PHASE	0.00608303	NEGATIVE REGULATION OF CELLULAR METABOLIC PROCESS	0.000424066	TRANSMEMBRANE RECEPTOR PROTEIN TYROSINE KINASE SIGNALING PATHWAY	5.27908e-23	NITROGEN COMPOUND BIOSYNTHETIC PROCESS	3.3389e-16
SKELETAL DEVELOPMENT	0.00608303	INTRA GOLGI VESICLE MEDIATED TRANSPORT	0.000426488	APICAL PART OF CELL	5.33056e-23	CARBOXYLIC ACID TRANSMEMBRANE TRANSPORTER ACTIVITY	3.45072e-16
CELLULAR LIPID CATABOLIC PROCESS	0.00616483	SENSORY PERCEPTION OF CHEMICAL STIMULUS	0.00042692	APICAL PLASMA MEMBRANE	5.33056e-23	ORGANIC ACID TRANSMEMBRANE TRANSPORTER ACTIVITY	3.45072e-16
CHROMOSOME SEGREGATION	0.00635037	CARBOXYLIC ACID METABOLIC PROCESS	0.000438704	ORGANELLE PART	5.51186e-23	REGULATION OF PROTEIN POLYMERIZATION	3.45072e-16
NEUROGENESIS	0.00635037	CELL PROLIFERATION GO 0008283	0.000440439	SYSTEM PROCESS	5.70396e-23	REGULATION OF MITOSIS	3.48756e-16
REGULATION OF HORMONE SECRETION	0.00635037	CHROMOSOME	0.000441919	INTRACELLULAR TRANSPORT	6.09318e-23	CORTICAL ACTIN CYTOSKELETON	3.59158e-16
OXIDOREDUCTASE ACTIVITY ACTING ON SULFUR GROUP OF DONORS	0.00636165	OXIDOREDUCTASE ACTIVITY GO 0016706	0.0004438	COENZYME BINDING	6.12564e-23	CONTRACTILE FIBER	3.68404e-16
INTEGRAL TO PLASMA MEMBRANE	0.00641974	ION CHANNEL ACTIVITY	0.000452236	PHOSPHOLIPASE C ACTIVATION	6.6787e-23	COENZYME BIOSYNTHETIC PROCESS	3.69016e-16
MEDIATOR COMPLEX	0.006466	NEGATIVE REGULATION OF TRANSCRIPTION	0.000464259	POSITIVE REGULATION OF SECRETION	6.74155e-23	STRUCTURAL MOLECULE ACTIVITY	3.75871e-16
INTRINSIC TO PLASMA MEMBRANE	0.00663974	REGULATION OF HORMONE SECRETION	0.000485381	VACUOLE	6.8932e-23	RESPONSE TO DNA DAMAGE STIMULUS	3.79775e-16
CYCLIC NUCLEOTIDE PHOSPHODIESTERASE ACTIVITY	0.00664475	SPINDLE ORGANIZATION AND BIOGENESIS	0.000495889	CIRCADIAN RHYTHM	7.12523e-23	ECTODERM DEVELOPMENT	3.83192e-16
CYTOSOLIC PART	0.00664475	ENZYME ACTIVATOR ACTIVITY	0.000496384	CENTRAL NERVOUS SYSTEM DEVELOPMENT	7.59208e-23	LIPOPROTEIN BINDING	4.05075e-16
EXTRACELLULAR MATRIX STRUCTURAL CONSTITUENT	0.00664475	MUSCLE CELL DIFFERENTIATION	0.000496384	CELLULAR LIPID CATABOLIC PROCESS	7.83897e-23	MYOFIBRIL	4.05075e-16
INWARD RECTIFIER POTASSIUM CHANNEL ACTIVITY	0.00664475	SYNAPSE	0.000496384	DNA BINDING	8.34051e-23	OXIDOREDUCTASE ACTIVITY GO 0016705	4.63214e-16
TRANSCRIPTION COFACTOR ACTIVITY	0.00664475	NEGATIVE REGULATION OF METABOLIC PROCESS	0.000504266	SYSTEM DEVELOPMENT	9.00303e-23	HISTONE DEACETYLASE BINDING	4.92575e-16
PURINE NUCLEOTIDE METABOLIC PROCESS	0.0069429	BEHAVIOR	0.000515732	TISSUE DEVELOPMENT	9.00303e-23	TRANSCRIPTION	5.16632e-16
OXIDOREDUCTASE ACTIVITY ACTING ON CH OH GROUP OF DONORS	0.00704364	INTERCELLULAR JUNCTION	0.000515732	CELL FRACTION	9.09719e-23	ELECTRON TRANSPORT GO 0006118	5.6065e-16
REGULATION OF BLOOD PRESSURE	0.0070688	CONTRACTILE FIBER	0.000525302	BASAL LAMINA	1.125e-22	SYSTEM DEVELOPMENT	5.64529e-16
LIPID TRANSPORT	0.00708744	GENERATION OF A SIGNAL INVOLVED IN CELL CELL SIGNALING	0.000527615	ACTIN CYTOSKELETON ORGANIZATION AND BIOGENESIS	1.13519e-22	ENDOPLASMIC RETICULUM	5.70267e-16
EXTRACELLULAR REGION	0.00730739	CONTRACTILE FIBER PART	0.000532419	SPERMATID DIFFERENTIATION	1.15764e-22	INTERMEDIATE FILAMENT	6.01897e-16
REGULATION OF IMMUNE SYSTEM PROCESS	0.00730739	CELL CYCLE PHASE	0.000543621	ACTIN FILAMENT BASED PROCESS	1.17333e-22	INTERMEDIATE FILAMENT CYTOSKELETON	6.01897e-16
TRANSMEMBRANE RECEPTOR PROTEIN KINASE ACTIVITY	0.00730739	MICROTUBULE MOTOR ACTIVITY	0.000572735	DNA DIRECTED DNA POLYMERASE ACTIVITY	1.22395e-22	NEGATIVE REGULATION OF TRANSCRIPTION	6.12425e-16
VOLTAGE GATED CHANNEL ACTIVITY	0.0073862	EXOPEPTIDASE ACTIVITY	0.000584833	MYOBLAST DIFFERENTIATION	1.26993e-22	PROTEIN MODIFICATION PROCESS	6.31707e-16
REGULATION OF RESPONSE TO STIMULUS	0.0074492	REGULATION OF PROTEIN POLYMERIZATION	0.000584833	INWARD RECTIFIER POTASSIUM CHANNEL ACTIVITY	1.45314e-22	HEPARIN BINDING	6.51458e-16
NUCLEAR CHROMATIN	0.00791013	RESPONSE TO CARBOHYDRATE STIMULUS	0.000595059	TRANSCRIPTION ACTIVATOR ACTIVITY	1.45314e-22	MULTICELLULAR ORGANISMAL DEVELOPMENT	6.62588e-16
NUCLEAR SPECK	0.00810168	LIPID RAFT	0.000608308	GLYCOPROTEIN BIOSYNTHETIC PROCESS	1.5019e-22	CELL JUNCTION	6.74312e-16
CELL PROLIFERATION GO 0008283	0.00811239	RESPONSE TO NUTRIENT	0.000608308	NEGATIVE REGULATION OF SIGNAL TRANSDUCTION	1.72634e-22	NEGATIVE REGULATION OF SIGNAL TRANSDUCTION	6.74312e-16
OXIDOREDUCTASE ACTIVITY ACTING ON THE CH NH GROUP OF DONORS	0.00820897	M PHASE	0.000614543	AMINE TRANSPORT	1.74227e-22	CELL CELL SIGNALING	6.83282e-16
MOTOR ACTIVITY	0.00823662	LIPID TRANSPORT	0.00061609	MONOVALENT INORGANIC CATION HOMEOSTASIS	1.76502e-22	REGULATION OF PROTEIN KINASE ACTIVITY	6.85225e-16
PROTEIN HETERODIMERIZATION ACTIVITY	0.00835181	NEGATIVE REGULATION OF CELLULAR PROCESS	0.00061609	G PROTEIN COUPLED RECEPTOR PROTEIN SIGNALING PATHWAY	1.82701e-22	VIRAL GENOME REPLICATION	7.14038e-16
CHEMICAL HOMEOSTASIS	0.00838615	NEGATIVE REGULATION OF RNA METABOLIC PROCESS	0.00061609	ORGANELLE OUTER MEMBRANE	1.93354e-22	REGULATION OF KINASE ACTIVITY	7.33322e-16
SULFUR COMPOUND BIOSYNTHETIC PROCESS	0.008488	NEGATIVE REGULATION OF TRANSCRIPTION DNA DEPENDENT	0.00061609	OUTER MEMBRANE	1.93354e-22	ANATOMICAL STRUCTURE DEVELOPMENT	7.46728e-16
PURINE NUCLEOTIDE BINDING	0.00861159	ORGANELLE ORGANIZATION AND BIOGENESIS	0.00061609	BIOPOLYMER METABOLIC PROCESS	2.01209e-22	MITOTIC SISTER CHROMATID SEGREGATION	7.4761e-16
INTERCELLULAR JUNCTION ASSEMBLY	0.00879866	PROTEIN COMPLEX BINDING	0.00061609	NUCLEOTIDE BINDING	2.04613e-22	SISTER CHROMATID SEGREGATION	7.4761e-16
PROTEIN SERINE THREONINE PHOSPHATASE COMPLEX	0.0088516	ATP BINDING	0.00063008	PROTEIN HOMODIMERIZATION ACTIVITY	2.04613e-22	PROTEIN OLIGOMERIZATION	7.77775e-16
PROTEASE INHIBITOR ACTIVITY	0.00897895	INSOLUBLE FRACTION	0.00063008	NUCLEOTIDYLTRANSFERASE ACTIVITY	2.66311e-22	VACUOLE	7.77775e-16
CELL CELL ADHESION	0.00898615	CHLORIDE CHANNEL ACTIVITY	0.000636589	REGULATION OF MULTICELLULAR ORGANISMAL PROCESS	2.71296e-22	ACTIVE TRANSMEMBRANE TRANSPORTER ACTIVITY	7.96562e-16
COPPER ION BINDING	0.00898615	RESPONSE TO ENDOGENOUS STIMULUS	0.000636589	NUCLEUS	2.79166e-22	GENERATION OF NEURONS	7.9999e-16
GENERATION OF NEURONS	0.00910946	CATION TRANSPORT	0.000651737	SYNAPTIC TRANSMISSION	2.94489e-22	EMBRYONIC MORPHOGENESIS	8.3496e-16
NEGATIVE REGULATION OF TRANSCRIPTION FROM RNA POLYMERASE II PROMOTER	0.00910946	TRANS GOLGI NETWORK TRANSPORT VESICLE	0.000668897	ESTABLISHMENT OF CELLULAR LOCALIZATION	3.10124e-22	BASEMENT MEMBRANE	8.66931e-16
PLASMA MEMBRANE PART	0.0091437	MITOCHONDRIAL OUTER MEMBRANE	0.000670439	ANATOMICAL STRUCTURE DEVELOPMENT	3.60149e-22	CYTOSKELETAL PROTEIN BINDING	9.06382e-16
EXTRACELLULAR MATRIX PART	0.0092566	XENOBIOTIC METABOLIC PROCESS	0.000678856	PROTEOGLYCAN BIOSYNTHETIC PROCESS	3.65717e-22	REGULATION OF NUCLEOBASENUCLEOSIDENUCLEOTIDE AND NUCLEIC ACID METABOLIC PROCESS	9.35335e-16
OXIDOREDUCTASE ACTIVITY GO 0016616	0.0092566	EXTRACELLULAR REGION PART	0.000683581	TRANSMISSION OF NERVE IMPULSE	3.77941e-22	CAMP MEDIATED SIGNALING	1.02405e-15
ACTIN FILAMENT BUNDLE FORMATION	0.00932948	MITOTIC SISTER CHROMATID SEGREGATION	0.000683581	CELL DEVELOPMENT	3.82735e-22	G PROTEIN SIGNALING COUPLED TO CAMP NUCLEOTIDE SECOND MESSENGER	1.02405e-15
KINASE ACTIVITY	0.00932948	POSITIVE REGULATION OF PHOSPHORYLATION	0.000683581	CYTOPLASM	5.15265e-22	NUCLEOPLASM PART	1.02405e-15
VASCULATURE DEVELOPMENT	0.0094069	SISTER CHROMATID SEGREGATION	0.000683581	REGULATION OF PROGRAMMED CELL DEATH	5.27771e-22	EPIDERMIS DEVELOPMENT	1.03436e-15
ANATOMICAL STRUCTURE DEVELOPMENT	0.00954973	TRANSCRIPTION ACTIVATOR ACTIVITY	0.000683581	NEUROPEPTIDE BINDING	5.29006e-22	POSITIVE REGULATION OF CELL ADHESION	1.06666e-15
GOLGI MEMBRANE	0.00954973	VITAMIN TRANSPORT	0.000683581	NEUROPEPTIDE RECEPTOR ACTIVITY	5.29006e-22	ICOSANOID METABOLIC PROCESS	1.07083e-15
MULTICELLULAR ORGANISMAL DEVELOPMENT	0.00955284	POSITIVE REGULATION OF CELL ADHESION	0.00069767	PROTEOGLYCAN METABOLIC PROCESS	5.5647e-22	G PROTEIN COUPLED RECEPTOR PROTEIN SIGNALING PATHWAY	1.16681e-15
NERVOUS SYSTEM DEVELOPMENT	0.00955284	PROTEIN AMINO ACID PHOSPHORYLATION	0.00069767	SECOND MESSENGER MEDIATED SIGNALING	5.81175e-22	LEARNING AND OR MEMORY	1.19436e-15
M PHASE OF MITOTIC CELL CYCLE	0.00961851	EXTRACELLULAR SPACE	0.000709783	ION TRANSPORT	5.88504e-22	HETEROCYCLE METABOLIC PROCESS	1.19522e-15
PROTEIN KINASE ACTIVITY	0.00961851	M PHASE OF MITOTIC CELL CYCLE	0.000727897	PROTEIN FOLDING	6.02633e-22	SECOND MESSENGER MEDIATED SIGNALING	1.19522e-15
MICROTUBULE ORGANIZING CENTER PART	0.0096617	CYTOSKELETAL PART	0.000736485	NEGATIVE REGULATION OF PROGRAMMED CELL DEATH	6.10256e-22	DNA DIRECTED RNA POLYMERASEII HOLOENZYME	1.30356e-15
PROTEIN PROCESSING	0.0096617	PROTEIN C TERMINUS BINDING	0.000744338	GAMETE GENERATION	6.39678e-22	LIPID BINDING	1.30356e-15
TRANSCRIPTION ACTIVATOR ACTIVITY	0.00984555	DETECTION OF CHEMICAL STIMULUS	0.000749783	NEUROLOGICAL SYSTEM PROCESS	6.48856e-22	BIOPOLYMER MODIFICATION	1.39251e-15
REGULATION OF RAS GTPASE ACTIVITY	0.00992916	COPPER ION BINDING	0.000752161	REGULATION OF TRANSFERASE ACTIVITY	6.48856e-22	CELLULAR CATION HOMEOSTASIS	1.44354e-15
REGULATION OF RHO GTPASE ACTIVITY	0.00992916	TRANSCRIPTION FROM RNA POLYMERASE II PROMOTER	0.000759577	LYSOSOME	6.50988e-22	CELLULAR MONOVALENT INORGANIC CATION HOMEOSTASIS	1.44819e-15
SYSTEM DEVELOPMENT	0.00992916	INWARD RECTIFIER POTASSIUM CHANNEL ACTIVITY	0.000763101	LYTIC VACUOLE	6.50988e-22	CATION HOMEOSTASIS	1.49414e-15
CELL CYCLE PHASE	0.0101793	PROTEIN HOMODIMERIZATION ACTIVITY	0.000771304	GLYCOPROTEIN METABOLIC PROCESS	7.12656e-22	G PROTEIN COUPLED RECEPTOR ACTIVITY	1.53117e-15
ECTODERM DEVELOPMENT	0.010279	ANTI APOPTOSIS	0.000774224	DNA REPAIR	7.36964e-22	ENZYME ACTIVATOR ACTIVITY	1.54632e-15
CHROMOSOME	0.0102838	TRANSMEMBRANE RECEPTOR ACTIVITY	0.000794646	TRANSMEMBRANE RECEPTOR PROTEIN KINASE ACTIVITY	7.80124e-22	NUCLEOSIDE TRIPHOSPHATASE ACTIVITY	1.58486e-15
NEUTRAL AMINO ACID TRANSPORT	0.0102838	ACTIN CYTOSKELETON ORGANIZATION AND BIOGENESIS	0.000803043	NITROGEN COMPOUND BIOSYNTHETIC PROCESS	8.27028e-22	CELL PROLIFERATION GO 0008283	1.62344e-15
EXTRACELLULAR MATRIX	0.0102948	MEMBRANE FRACTION	0.000807014	STEROID BIOSYNTHETIC PROCESS	8.66487e-22	REGULATION OF PROTEIN STABILITY	1.6297e-15
GOLGI STACK	0.0102948	REGULATION OF DEFENSE RESPONSE	0.000818687	DNA PACKAGING	8.801e-22	REGULATION OF TRANSLATIONAL INITIATION	1.63837e-15
PROTEINACEOUS EXTRACELLULAR MATRIX	0.0102948	PROTEIN AMINO ACID N LINKED GLYCOSYLATION	0.000825043	RHODOPSIN LIKE RECEPTOR ACTIVITY	9.12681e-22	RNA POLYMERASE II TRANSCRIPTION FACTOR ACTIVITY	1.66337e-15
SPERM MOTILITY	0.0102948	REGULATION OF MITOSIS	0.000825043	ENZYME REGULATOR ACTIVITY	9.75804e-22	SKELETAL DEVELOPMENT	1.668e-15
DEVELOPMENT OF PRIMARY SEXUAL CHARACTERISTICS	0.0103072	SEQUENCE SPECIFIC DNA BINDING	0.000825043	REGULATION OF PROTEIN KINASE ACTIVITY	9.91192e-22	CYCLIC NUCLEOTIDE MEDIATED SIGNALING	1.76191e-15
REGULATION OF CELLULAR PH	0.0104287	CELL CYCLE PROCESS	0.000847682	RESPONSE TO EXTRACELLULAR STIMULUS	1.01504e-21	G PROTEIN SIGNALING COUPLED TO CYCLIC NUCLEOTIDE SECOND MESSENGER	1.76191e-15
UBIQUITIN LIGASE COMPLEX	0.0104287	G1 S TRANSITION OF MITOTIC CELL CYCLE	0.000862283	CELL MIGRATION	1.11981e-21	RECEPTOR COMPLEX	1.76191e-15
DNA INTEGRITY CHECKPOINT	0.0104441	NEGATIVE REGULATION OF BIOLOGICAL PROCESS	0.000862283	LYSOSOMAL MEMBRANE	1.11981e-21	LIPID CATABOLIC PROCESS	1.77419e-15
INTERCELLULAR JUNCTION	0.0105169	REGULATION OF GENE EXPRESSION EPIGENETIC	0.000867207	REPRODUCTIVE PROCESS	1.11981e-21	ION BINDING	1.8815e-15
REGULATION OF MULTICELLULAR ORGANISMAL PROCESS	0.0105169	ALCOHOL METABOLIC PROCESS	0.000880184	VACUOLAR MEMBRANE	1.11981e-21	IMMUNE SYSTEM PROCESS	1.91415e-15
CYTOSKELETON ORGANIZATION AND BIOGENESIS	0.0105914	HEMATOPOIETIN INTERFERON CLASSD200 DOMAIN CYTOKINE RECEPTOR BINDING	0.000887183	CATION BINDING	1.18012e-21	REGULATION OF MULTICELLULAR ORGANISMAL PROCESS	1.9465e-15
ION HOMEOSTASIS	0.0105914	DYSTROPHIN ASSOCIATED GLYCOPROTEIN COMPLEX	0.000910457	ZINC ION BINDING	1.20653e-21	REGULATION OF GENE EXPRESSION	2.04847e-15
PURINE RIBONUCLEOTIDE METABOLIC PROCESS	0.0109052	IDENTICAL PROTEIN BINDING	0.000916449	CONTRACTILE FIBER	1.45175e-21	AMINE TRANSMEMBRANE TRANSPORTER ACTIVITY	2.15143e-15
REGULATION OF TRANSCRIPTION FROM RNA POLYMERASE II PROMOTER	0.0110865	PROTEIN SERINE THREONINE TYROSINE KINASE ACTIVITY	0.000916449	REGULATION OF KINASE ACTIVITY	1.47921e-21	ORGAN DEVELOPMENT	2.15143e-15
CELLULAR DEFENSE RESPONSE	0.0111165	GOLGI APPARATUS	0.000938023	PROTEIN KINASE REGULATOR ACTIVITY	1.49556e-21	STRUCTURAL CONSTITUENT OF MUSCLE	2.17374e-15
CELL JUNCTION	0.0111581	PERINUCLEAR REGION OF CYTOPLASM	0.000952587	NUCLEAR ENVELOPE	1.57591e-21	CELLULAR CARBOHYDRATE METABOLIC PROCESS	2.27941e-15
PURINE RIBONUCLEOTIDE BINDING	0.0112035	NEGATIVE REGULATION OF NUCLEOBASENUCLEOSIDENUCLEOTIDE AND NUCLEIC ACID METABOLIC PROCESS	0.000966048	KINASE REGULATOR ACTIVITY	1.6266e-21	CHROMATIN	2.27941e-15
STEROID METABOLIC PROCESS	0.0113835	INACTIVATION OF MAPK ACTIVITY	0.000995329	TRICARBOXYLIC ACID CYCLE INTERMEDIATE METABOLIC PROCESS	1.65092e-21	INTRACELLULAR NON MEMBRANE BOUND ORGANELLE	2.42029e-15
CHROMATIN ASSEMBLY OR DISASSEMBLY	0.0113897	PHOSPHORYLATION	0.000995329	MEMBRANE ORGANIZATION AND BIOGENESIS	1.65305e-21	NON MEMBRANE BOUND ORGANELLE	2.42029e-15
REPLICATION FORK	0.0114963	EXTRACELLULAR MATRIX	0.000996107	PROTEIN COMPLEX	1.67159e-21	PROTEASOME COMPLEX	2.63325e-15
CHROMOSOMAL PART	0.0117285	PROTEINACEOUS EXTRACELLULAR MATRIX	0.000996107	NUCLEAR LUMEN	2.00041e-21	GALACTOSYLTRANSFERASE ACTIVITY	2.69536e-15
COENZYME METABOLIC PROCESS	0.0119787	RESPONSE TO CHEMICAL STIMULUS	0.00104339	LIPID TRANSPORT	2.15035e-21	ORGAN MORPHOGENESIS	2.79569e-15
ACTIVE TRANSMEMBRANE TRANSPORTER ACTIVITY	0.0120432	EXTRACELLULAR MATRIX PART	0.00106866	NUCLEASE ACTIVITY	2.15035e-21	TRANSLATIONAL INITIATION	2.79964e-15
IONOTROPIC GLUTAMATE RECEPTOR ACTIVITY	0.0122567	PATTERN SPECIFICATION PROCESS	0.00106981	POSITIVE REGULATION OF TRANSPORT	2.49685e-21	CELL SUBSTRATE ADHESION	2.81068e-15
INTRINSIC TO MEMBRANE	0.0123629	ACTIN CYTOSKELETON	0.00110925	TRANSMEMBRANE TRANSPORTER ACTIVITY	2.81412e-21	REGULATION OF CELLULAR METABOLIC PROCESS	2.81068e-15
CARBOXYLIC ACID TRANSMEMBRANE TRANSPORTER ACTIVITY	0.0124718	MITOTIC CELL CYCLE	0.00117766	RESPONSE TO CARBOHYDRATE STIMULUS	2.88643e-21	NEGATIVE REGULATION OF BIOLOGICAL PROCESS	2.82159e-15
INTEGRAL TO MEMBRANE	0.0124718	REGULATION OF NEUROTRANSMITTER LEVELS	0.00119052	POST GOLGI VESICLE MEDIATED TRANSPORT	2.88911e-21	NEGATIVE REGULATION OF CELLULAR PROCESS	2.9673e-15
MICROTUBULE ORGANIZING CENTER	0.0124718	POSITIVE REGULATION OF LYMPHOCYTE ACTIVATION	0.00120004	CHROMATIN REMODELING COMPLEX	2.94259e-21	MICROTUBULE MOTOR ACTIVITY	3.08099e-15
NUCLEAR HORMONE RECEPTOR BINDING	0.0124718	REGULATION OF RAS PROTEIN SIGNAL TRANSDUCTION	0.00122198	PROTEIN DNA COMPLEX ASSEMBLY	3.07502e-21	DNA RECOMBINATION	3.24491e-15
ORGANIC ACID TRANSMEMBRANE TRANSPORTER ACTIVITY	0.0124718	REGULATION OF RHO PROTEIN SIGNAL TRANSDUCTION	0.00122198	TRANSMEMBRANE RECEPTOR ACTIVITY	3.07724e-21	NUCLEOBASENUCLEOSIDENUCLEOTIDE AND NUCLEIC ACID METABOLIC PROCESS	3.31622e-15
PHOSPHOTRANSFERASE ACTIVITY ALCOHOL GROUP AS ACCEPTOR	0.0124718	CENTRAL NERVOUS SYSTEM DEVELOPMENT	0.00122733	REGULATION OF GENE EXPRESSION EPIGENETIC	3.24543e-21	EXTRACELLULAR REGION PART	3.35517e-15
DNA PACKAGING	0.012793	DNA DIRECTED RNA POLYMERASEII HOLOENZYME	0.00124898	CELLULAR CARBOHYDRATE METABOLIC PROCESS	3.27317e-21	MEMBRANE FRACTION	3.35517e-15
GAMETE GENERATION	0.0129617	TRANSCRIPTION FACTOR BINDING	0.00126394	PLASMA MEMBRANE	3.3708e-21	REGULATION OF METABOLIC PROCESS	3.35517e-15
CELLULAR PROTEIN COMPLEX ASSEMBLY	0.0130818	PROTEIN SERINE THREONINE KINASE ACTIVITY	0.0012691	STRUCTURAL MOLECULE ACTIVITY	3.60653e-21	TRANSMEMBRANE TRANSPORTER ACTIVITY	3.39069e-15
RNA EXPORT FROM NUCLEUS	0.0130818	REGULATION OF LYMPHOCYTE ACTIVATION	0.00127902	ANTI APOPTOSIS	3.68353e-21	OXIDOREDUCTASE ACTIVITY ACTING ON PEROXIDE AS ACCEPTOR	3.4199e-15
GLUTATHIONE TRANSFERASE ACTIVITY	0.0133742	INTERLEUKIN 2 PRODUCTION	0.00129611	SECONDARY ACTIVE TRANSMEMBRANE TRANSPORTER ACTIVITY	4.77137e-21	VASCULATURE DEVELOPMENT	3.51059e-15
REPRODUCTION	0.0134822	CELL CORTEX PART	0.00131812	ORGAN DEVELOPMENT	4.9923e-21	TISSUE REMODELING	3.57405e-15
AMINE TRANSPORT	0.0137485	TRANSCRIPTION COREPRESSOR ACTIVITY	0.00134404	MACROMOLECULE LOCALIZATION	5.19028e-21	ANATOMICAL STRUCTURE MORPHOGENESIS	3.65561e-15
GTPASE REGULATOR ACTIVITY	0.0137485	RESPONSE TO ORGANIC SUBSTANCE	0.00136656	NUCLEAR PART	6.34238e-21	POSITIVE REGULATION OF HYDROLASE ACTIVITY	3.92622e-15
LIPID HOMEOSTASIS	0.0137504	NEGATIVE REGULATION OF CELLULAR PROTEIN METABOLIC PROCESS	0.00136818	CELL CELL SIGNALING	6.71545e-21	REPRODUCTION	4.06808e-15
MITOTIC SISTER CHROMATID SEGREGATION	0.0137504	NEUROPEPTIDE HORMONE ACTIVITY	0.0013761	HORMONE SECRETION	6.71545e-21	PERINUCLEAR REGION OF CYTOPLASM	4.53181e-15
NEUTRAL AMINO ACID TRANSMEMBRANE TRANSPORTER ACTIVITY	0.0137504	CHROMOSOMAL PART	0.00138568	REGULATION OF CELLULAR PH	6.80468e-21	TIGHT JUNCTION	4.54462e-15
PLASMA MEMBRANE	0.0137504	AMINO ACID METABOLIC PROCESS	0.00139097	INTEGRAL TO MEMBRANE	7.58303e-21	GENERATION OF A SIGNAL INVOLVED IN CELL CELL SIGNALING	4.7182e-15
SISTER CHROMATID SEGREGATION	0.0137504	DEAMINASE ACTIVITY	0.00139097	INTRINSIC TO MEMBRANE	7.944e-21	GLUTAMATE RECEPTOR ACTIVITY	4.73819e-15
PERIPHERAL NERVOUS SYSTEM DEVELOPMENT	0.0141065	GLUCOSE METABOLIC PROCESS	0.00142108	REPRODUCTION	8.04296e-21	TRANSLATION INITIATION FACTOR ACTIVITY	5.06542e-15
ACTIN POLYMERIZATION AND OR DEPOLYMERIZATION	0.0143251	MITOSIS	0.00148836	ACTIVE TRANSMEMBRANE TRANSPORTER ACTIVITY	9.26585e-21	CHROMOSOMEPERICENTRIC REGION	5.45485e-15
SENSORY PERCEPTION OF TASTE	0.014542	ANATOMICAL STRUCTURE MORPHOGENESIS	0.00151566	SODIUM ION TRANSPORT	9.26585e-21	TRNA METABOLIC PROCESS	5.49269e-15
SEXUAL REPRODUCTION	0.0145576	GOLGI APPARATUS PART	0.00154201	ENZYME BINDING	1.19386e-20	ANTI APOPTOSIS	5.49669e-15
G1 S TRANSITION OF MITOTIC CELL CYCLE	0.0148865	KINESIN COMPLEX	0.00155272	MEMBRANE	1.21883e-20	EPIDERMAL GROWTH FACTOR RECEPTOR SIGNALING PATHWAY	5.54016e-15
AMYLOID PRECURSOR PROTEIN METABOLIC PROCESS	0.0150611	METALLOPEPTIDASE ACTIVITY	0.00155283	ION TRANSMEMBRANE TRANSPORTER ACTIVITY	1.35561e-20	CHROMOSOME CONDENSATION	5.55494e-15
INTEGRATOR COMPLEX	0.0150611	CELLULAR CATION HOMEOSTASIS	0.0015617	ATP DEPENDENT RNA HELICASE ACTIVITY	1.38948e-20	FEMALE PREGNANCY	5.55494e-15
REGULATION OF DEFENSE RESPONSE	0.0150611	NEURON PROJECTION	0.00156408	BEHAVIOR	1.51475e-20	LIPID RAFT	5.55494e-15
REGULATION OF NUCLEOCYTOPLASMIC TRANSPORT	0.0150611	ENDOPLASMIC RETICULUM	0.00158464	IMMUNE RESPONSE	1.55704e-20	BIOPOLYMER METABOLIC PROCESS	5.61262e-15
TRANSCRIPTION FROM RNA POLYMERASE II PROMOTER	0.0150611	PURINE NUCLEOTIDE BINDING	0.00158464	CELL SURFACE RECEPTOR LINKED SIGNAL TRANSDUCTION GO 0007166	1.75784e-20	OXIDOREDUCTASE ACTIVITY ACTING ON SULFUR GROUP OF DONORS	5.65167e-15
CYTOSKELETON	0.0151154	STRUCTURAL MOLECULE ACTIVITY	0.00158464	EPIDERMAL GROWTH FACTOR RECEPTOR SIGNALING PATHWAY	1.87334e-20	SECONDARY ACTIVE TRANSMEMBRANE TRANSPORTER ACTIVITY	5.74773e-15
GOLGI APPARATUS	0.0151695	TRANSCRIPTION REPRESSOR ACTIVITY	0.00158464	G PROTEIN COUPLED RECEPTOR ACTIVITY	1.91291e-20	NEGATIVE REGULATION OF RNA METABOLIC PROCESS	5.80297e-15
HORMONE RECEPTOR BINDING	0.0151699	DNA DEPENDENT DNA REPLICATION	0.0016392	HORMONE ACTIVITY	1.99141e-20	NEGATIVE REGULATION OF TRANSCRIPTION DNA DEPENDENT	5.80297e-15
IMMUNE RESPONSE	0.0154689	LOCOMOTORY BEHAVIOR	0.00164128	LIPID RAFT	2.23594e-20	RESPONSE TO XENOBIOTIC STIMULUS	5.80297e-15
ATPASE ACTIVITY	0.0156764	DNA HELICASE ACTIVITY	0.00169397	ESTABLISHMENT OF LOCALIZATION	2.31047e-20	DIGESTION	5.86331e-15
NUCLEOSIDE TRIPHOSPHATASE ACTIVITY	0.0156764	REGULATION OF RNA METABOLIC PROCESS	0.00171236	PROTEOLYSIS	2.32126e-20	SEXUAL REPRODUCTION	5.92279e-15
REGULATION OF CATABOLIC PROCESS	0.0156821	AMINE TRANSPORT	0.00172822	POSITIVE REGULATION OF CELL CYCLE	2.41072e-20	NUCLEOPLASM	6.02702e-15
CENTROSOME	0.0157388	SULFUR METABOLIC PROCESS	0.00177989	DNA POLYMERASE ACTIVITY	2.46243e-20	RNA METABOLIC PROCESS	6.09307e-15
SMALL GTPASE REGULATOR ACTIVITY	0.0157388	PHOSPHORIC ESTER HYDROLASE ACTIVITY	0.00178099	NEGATIVE REGULATION OF CELLULAR PROTEIN METABOLIC PROCESS	2.54911e-20	CHEMOKINE ACTIVITY	6.20918e-15
MEMBRANE FRACTION	0.016003	REGULATION OF MUSCLE CONTRACTION	0.00178301	NEGATIVE REGULATION OF PROTEIN METABOLIC PROCESS	2.54911e-20	INSOLUBLE FRACTION	6.42713e-15
GLIOGENESIS	0.0161145	VOLTAGE GATED CATION CHANNEL ACTIVITY	0.00178301	SEQUENCE SPECIFIC DNA BINDING	2.70996e-20	LOW DENSITY LIPOPROTEIN BINDING	6.59628e-15
MEMBRANE LIPID METABOLIC PROCESS	0.0161145	GLUTAMATE RECEPTOR ACTIVITY	0.00179087	REGULATION OF MUSCLE CONTRACTION	2.94288e-20	ORGANIC ACID METABOLIC PROCESS	7.15018e-15
LEARNING AND OR MEMORY	0.016331	RNA BIOSYNTHETIC PROCESS	0.00179926	METAL ION TRANSPORT	3.0546e-20	DNA BINDING	8.07753e-15
NUCLEAR EXPORT	0.0164729	MONOVALENT INORGANIC CATION HOMEOSTASIS	0.00180059	MEMBRANE ENCLOSED LUMEN	3.14543e-20	PROTEIN AMINO ACID N LINKED GLYCOSYLATION	8.6376e-15
CELL CYCLE PROCESS	0.0166965	APICAL JUNCTION COMPLEX	0.00180145	ORGANELLE LUMEN	3.14543e-20	INTERCELLULAR JUNCTION	8.66701e-15
DNA DIRECTED RNA POLYMERASEII HOLOENZYME	0.0168501	APICOLATERAL PLASMA MEMBRANE	0.00180145	INTERCELLULAR JUNCTION ASSEMBLY	3.31896e-20	GOLGI APPARATUS PART	8.94846e-15
CATION TRANSMEMBRANE TRANSPORTER ACTIVITY	0.0170441	ATPASE ACTIVITY	0.00180333	ATPASE ACTIVITY COUPLED	3.45372e-20	CARBOXYLIC ACID METABOLIC PROCESS	9.0506e-15
SKELETAL MUSCLE DEVELOPMENT	0.0170441	ENDONUCLEASE ACTIVITY	0.00180333	INTERCELLULAR JUNCTION ASSEMBLY AND MAINTENANCE	3.46577e-20	NEGATIVE REGULATION OF PROGRAMMED CELL DEATH	9.32627e-15
SMOOTH MUSCLE CONTRACTION GO 0006939	0.0170441	NERVOUS SYSTEM DEVELOPMENT	0.00180333	PLASMA MEMBRANE PART	3.56748e-20	DNA POLYMERASE ACTIVITY	9.42249e-15
VIRAL GENOME REPLICATION	0.0173436	NUCLEOPLASM PART	0.00180333	IDENTICAL PROTEIN BINDING	3.60492e-20	SUBSTRATE SPECIFIC TRANSMEMBRANE TRANSPORTER ACTIVITY	9.84481e-15
NEGATIVE REGULATION OF RNA METABOLIC PROCESS	0.0173981	REGULATION OF TRANSCRIPTIONDNA DEPENDENT	0.00180333	METALLOENDOPEPTIDASE ACTIVITY	3.71275e-20	HYDROLASE ACTIVITY ACTING ON CARBON NITROGEN NOT PEPTIDEBONDSIN LINEAR AMIDES	9.88395e-15
NEGATIVE REGULATION OF TRANSCRIPTION DNA DEPENDENT	0.0173981	TRANSCRIPTION	0.00180333	HYDROLASE ACTIVITY ACTING ON ESTER BONDS	3.98774e-20	INTEGRAL TO MEMBRANE	1.00313e-14
OXIDOREDUCTASE ACTIVITY	0.0173981	TRANSCRIPTION DNA DEPENDENT	0.00180333	MICROTUBULE MOTOR ACTIVITY	4.17886e-20	INTRINSIC TO MEMBRANE	1.00313e-14
REGULATION OF MUSCLE CONTRACTION	0.0174079	CELLULAR LOCALIZATION	0.00181088	REGULATION OF CELLULAR PROTEIN METABOLIC PROCESS	4.49171e-20	OXIDOREDUCTASE ACTIVITY GO 0016706	1.03033e-14
RECEPTOR ACTIVITY	0.0177381	PURINE RIBONUCLEOTIDE BINDING	0.00183077	SUBSTRATE SPECIFIC TRANSMEMBRANE TRANSPORTER ACTIVITY	6.01522e-20	CELLULAR LOCALIZATION	1.07223e-14
CELL SURFACE RECEPTOR LINKED SIGNAL TRANSDUCTION GO 0007166	0.0177597	MEIOTIC RECOMBINATION	0.00184564	NUCLEAR MEMBRANE	6.46048e-20	REGULATION OF BODY FLUID LEVELS	1.08809e-14
DNA REPLICATION	0.0177597	PHOSPHOPROTEIN PHOSPHATASE ACTIVITY	0.00185782	ENDOPLASMIC RETICULUM	6.57627e-20	ATPASE ACTIVITY	1.14326e-14
POSITIVE REGULATION OF SECRETION	0.0180632	CELLULAR MORPHOGENESIS DURING DIFFERENTIATION	0.00191418	IMMUNE EFFECTOR PROCESS	7.47007e-20	L AMINO ACID TRANSMEMBRANE TRANSPORTER ACTIVITY	1.14326e-14
REGULATION OF IMMUNE RESPONSE	0.0180632	METAL ION TRANSMEMBRANE TRANSPORTER ACTIVITY	0.00200339	BIOPOLYMER CATABOLIC PROCESS	7.54957e-20	TRANSMEMBRANE RECEPTOR ACTIVITY	1.18594e-14
CALMODULIN BINDING	0.0181032	NUCLEOSIDE TRIPHOSPHATASE ACTIVITY	0.00201184	RESPONSE TO DRUG	7.64299e-20	LYSOSOME	1.1993e-14
HETEROCYCLE METABOLIC PROCESS	0.0181618	SYSTEM DEVELOPMENT	0.00202063	CYTOPLASM ORGANIZATION AND BIOGENESIS	7.96384e-20	LYTIC VACUOLE	1.1993e-14
RESPONSE TO DRUG	0.0181618	POST TRANSLATIONAL PROTEIN MODIFICATION	0.00202921	MACROMOLECULE CATABOLIC PROCESS	8.38983e-20	HEMOSTASIS	1.22451e-14
MITOTIC CELL CYCLE	0.018199	NEGATIVE REGULATION OF PROTEIN METABOLIC PROCESS	0.00202976	DNA HELICASE ACTIVITY	8.52658e-20	KERATINOCYTE DIFFERENTIATION	1.30507e-14
NUCLEOTIDE BINDING	0.018199	ANATOMICAL STRUCTURE DEVELOPMENT	0.00203306	TRANSPORT	8.52658e-20	NEGATIVE REGULATION OF CELLULAR METABOLIC PROCESS	1.36012e-14
PHOSPHORIC ESTER HYDROLASE ACTIVITY	0.018199	NUCLEOTIDE BINDING	0.00205504	EXTRACELLULAR MATRIX STRUCTURAL CONSTITUENT	8.71263e-20	IMMUNE EFFECTOR PROCESS	1.4109e-14
RESPONSE TO CHEMICAL STIMULUS	0.018199	MOTOR ACTIVITY	0.00207965	PROTEIN LOCALIZATION	9.63093e-20	NUCLEUS	1.41665e-14
TISSUE DEVELOPMENT	0.018199	EPIDERMIS DEVELOPMENT	0.00209948	STRUCTURAL CONSTITUENT OF MUSCLE	1.03605e-19	CELLULAR MACROMOLECULE CATABOLIC PROCESS	1.45868e-14
FATTY ACID OXIDATION	0.0184683	ENZYME REGULATOR ACTIVITY	0.00210922	CELLULAR CATABOLIC PROCESS	1.03928e-19	BEHAVIOR	1.46512e-14
SODIUM ION TRANSPORT	0.0186157	ANION CHANNEL ACTIVITY	0.00215815	POSITIVE REGULATION OF CELL PROLIFERATION	1.07149e-19	TRANS GOLGI NETWORK TRANSPORT VESICLE	1.47894e-14
ORGAN DEVELOPMENT	0.0186909	REGULATION OF TRANSCRIPTION	0.00216974	SKELETAL DEVELOPMENT	1.08183e-19	PROTEIN C TERMINUS BINDING	1.52067e-14
RESPONSE TO ENDOGENOUS STIMULUS	0.0186909	CATION HOMEOSTASIS	0.00217827	CATION TRANSPORT	1.08811e-19	RAS PROTEIN SIGNAL TRANSDUCTION	1.52067e-14
REPRODUCTIVE PROCESS	0.018982	APICAL PLASMA MEMBRANE	0.00221876	RIBONUCLEASE ACTIVITY	1.14586e-19	JAK STAT CASCADE	1.5867e-14
PROTEIN DIMERIZATION ACTIVITY	0.0191666	EMBRYONIC MORPHOGENESIS	0.00221876	REGULATION OF APOPTOSIS	1.19834e-19	NEGATIVE REGULATION OF METABOLIC PROCESS	1.59602e-14
AMINO ACID TRANSMEMBRANE TRANSPORTER ACTIVITY	0.0195365	ENDOPLASMIC RETICULUM LUMEN	0.00221876	SECRETORY PATHWAY	1.20738e-19	TRANSITION METAL ION BINDING	1.75304e-14
INTRACELLULAR RECEPTOR MEDIATED SIGNALING PATHWAY	0.0196499	INSULIN RECEPTOR SIGNALING PATHWAY	0.00221876	ACETYLCHOLINE BINDING	1.25289e-19	COFACTOR CATABOLIC PROCESS	1.77844e-14
PROTEIN HOMODIMERIZATION ACTIVITY	0.0196499	COENZYME METABOLIC PROCESS	0.00225059	MITOCHONDRION ORGANIZATION AND BIOGENESIS	1.28973e-19	METALLOENDOPEPTIDASE ACTIVITY	1.80888e-14
SECONDARY ACTIVE TRANSMEMBRANE TRANSPORTER ACTIVITY	0.0196499	REGULATION OF GENE EXPRESSION	0.00226485	SUBSTRATE SPECIFIC TRANSPORTER ACTIVITY	1.38469e-19	TISSUE DEVELOPMENT	1.82181e-14
STEROID HORMONE RECEPTOR SIGNALING PATHWAY	0.0196499	REGULATION OF PROTEIN KINASE ACTIVITY	0.00234986	GLYCOSAMINOGLYCAN BINDING	1.52643e-19	CELLULAR LIPID CATABOLIC PROCESS	2.0864e-14
KERATINOCYTE DIFFERENTIATION	0.0198162	MEIOTIC CELL CYCLE	0.00238351	SEXUAL REPRODUCTION	1.56289e-19	REPRODUCTIVE PROCESS	2.10285e-14
PROTEIN AMINO ACID O LINKED GLYCOSYLATION	0.020079	IMMUNE RESPONSE	0.00238559	INTEGRAL TO PLASMA MEMBRANE	1.57143e-19	MYOSIN COMPLEX	2.18138e-14
PHOSPHOINOSITIDE METABOLIC PROCESS	0.0201891	CHROMOSOME CONDENSATION	0.00240111	REGULATION OF DEVELOPMENTAL PROCESS	1.58791e-19	CHLORIDE CHANNEL ACTIVITY	2.30235e-14
PHOSPHOTRANSFERASE ACTIVITY PHOSPHATE GROUP AS ACCEPTOR	0.0201891	INTRINSIC TO PLASMA MEMBRANE	0.00240607	INTRINSIC TO PLASMA MEMBRANE	1.70746e-19	GTPASE ACTIVITY	2.35768e-14
LOCOMOTORY BEHAVIOR	0.0201923	CHROMOSOMEPERICENTRIC REGION	0.00243392	MEMBRANE PART	1.71607e-19	RECEPTOR ACTIVITY	2.463e-14
PDZ DOMAIN BINDING	0.0201923	CELLULAR HOMEOSTASIS	0.00245289	PROTEIN COMPLEX BINDING	1.74713e-19	ACTIN CYTOSKELETON ORGANIZATION AND BIOGENESIS	2.4863e-14
ATPASE ACTIVITY COUPLED TO TRANSMEMBRANE MOVEMENT OF IONS PHOSPHORYLATIVE MECHANISM	0.0207133	INTEGRAL TO PLASMA MEMBRANE	0.00245289	REGULATION OF CATALYTIC ACTIVITY	1.75538e-19	TRANSCRIPTION FACTOR ACTIVITY	2.51545e-14
ESTABLISHMENT OF LOCALIZATION	0.0210777	CELLULAR PROTEIN CATABOLIC PROCESS	0.00245969	CATION TRANSMEMBRANE TRANSPORTER ACTIVITY	1.88046e-19	PYROPHOSPHATASE ACTIVITY	2.5744e-14
RECEPTOR COMPLEX	0.0212622	MICROSOME	0.00246229	NUCLEAR MEMBRANE PART	2.34605e-19	CELLULAR RESPONSE TO STIMULUS	2.62132e-14
PHOSPHATASE BINDING	0.0216341	VESICULAR FRACTION	0.00246229	NEUROTRANSMITTER RECEPTOR ACTIVITY	2.45357e-19	SENSORY PERCEPTION	2.62967e-14
NEGATIVE REGULATION OF IMMUNE SYSTEM PROCESS	0.0220083	CELL RECOGNITION	0.00257516	RESPONSE TO UV	2.85937e-19	NUCLEAR CHROMOSOME	2.64775e-14
HELICASE ACTIVITY	0.0220773	HEPARIN BINDING	0.00257516	CATABOLIC PROCESS	2.96544e-19	POTASSIUM ION TRANSPORT	2.6617e-14
NEURON DIFFERENTIATION	0.0220773	REGULATION OF CELLULAR METABOLIC PROCESS	0.00257516	VIRAL GENOME REPLICATION	2.96544e-19	HYDROLASE ACTIVITY ACTING ON ACID ANHYDRIDES	2.66264e-14
STRIATED MUSCLE CONTRACTION GO 0006941	0.0220773	MULTICELLULAR ORGANISMAL DEVELOPMENT	0.00257678	NUCLEOTIDE EXCISION REPAIR	3.14331e-19	DNA REPAIR	2.86283e-14
TRANSFERASE ACTIVITY TRANSFERRING PHOSPHORUS CONTAINING GROUPS	0.0222669	REGULATION OF SMALL GTPASE MEDIATED SIGNAL TRANSDUCTION	0.00259538	RNA EXPORT FROM NUCLEUS	3.20402e-19	INTRACELLULAR ORGANELLE PART	2.86283e-14
AMINE TRANSMEMBRANE TRANSPORTER ACTIVITY	0.0224561	DNA METABOLIC PROCESS	0.00263253	G1 S TRANSITION OF MITOTIC CELL CYCLE	3.2247e-19	PLASMA MEMBRANE	2.9118e-14
ENDOPLASMIC RETICULUM LUMEN	0.0226379	ECTODERM DEVELOPMENT	0.00269436	ANATOMICAL STRUCTURE MORPHOGENESIS	3.42248e-19	NEGATIVE REGULATION OF TRANSFERASE ACTIVITY	2.92573e-14
PROTEIN AMINO ACID PHOSPHORYLATION	0.0226431	NEUROGENESIS	0.00270117	FEEDING BEHAVIOR	3.43983e-19	TELOMERIC DNA BINDING	2.94995e-14
CHROMOSOME CONDENSATION	0.0226783	POSITIVE REGULATION OF PHOSPHATE METABOLIC PROCESS	0.00272049	EXTRACELLULAR MATRIX PART	3.47239e-19	CELL CORTEX PART	3.02148e-14
REGULATION OF CELLULAR COMPONENT ORGANIZATION AND BIOGENESIS	0.0234716	ENZYME BINDING	0.00272964	REGULATION OF MOLECULAR FUNCTION	3.76863e-19	MOTOR ACTIVITY	3.02148e-14
CELLULAR MORPHOGENESIS DURING DIFFERENTIATION	0.0235875	REGULATION OF CYTOKINE PRODUCTION	0.00277031	RESPONSE TO CHEMICAL STIMULUS	4.17559e-19	ORGANELLE PART	3.03109e-14
POSITIVE REGULATION OF DEFENSE RESPONSE	0.0236514	PLASMA MEMBRANE PART	0.00282521	DNA DEPENDENT ATPASE ACTIVITY	4.32285e-19	EXTRACELLULAR SPACE	3.22338e-14
REGULATION OF PROTEIN IMPORT INTO NUCLEUS	0.023759	PYROPHOSPHATASE ACTIVITY	0.00283705	PROTEIN SERINE THREONINE PHOSPHATASE ACTIVITY	4.51661e-19	CYTOPLASMIC PART	3.23728e-14
RNA HELICASE ACTIVITY	0.023783	LYSOSOME	0.0028733	SERINE HYDROLASE ACTIVITY	4.78183e-19	ION TRANSMEMBRANE TRANSPORTER ACTIVITY	3.27117e-14
SPERMATID DIFFERENTIATION	0.0238358	LYTIC VACUOLE	0.0028733	SERINE TYPE PEPTIDASE ACTIVITY	4.78183e-19	POSITIVE REGULATION OF RESPONSE TO STIMULUS	3.30525e-14
SULFUR METABOLIC PROCESS	0.0239481	REGULATION OF TRANSFERASE ACTIVITY	0.0028733	ORGAN MORPHOGENESIS	4.8131e-19	INTEGRAL TO PLASMA MEMBRANE	3.36313e-14
REGULATION OF T CELL ACTIVATION	0.024438	PROTEIN STABILIZATION	0.0028892	PROGRAMMED CELL DEATH	4.82116e-19	GLUTATHIONE TRANSFERASE ACTIVITY	3.3753e-14
PYROPHOSPHATASE ACTIVITY	0.0244551	REGULATION OF T CELL ACTIVATION	0.0028892	NEGATIVE REGULATION OF DEVELOPMENTAL PROCESS	5.15931e-19	MITOCHONDRION ORGANIZATION AND BIOGENESIS	3.39989e-14
MEMBRANE PART	0.0247249	NUCLEAR EXPORT	0.00294666	POSITIVE REGULATION OF LYMPHOCYTE ACTIVATION	5.18954e-19	ENZYME REGULATOR ACTIVITY	3.42043e-14
PHOSPHOPROTEIN PHOSPHATASE ACTIVITY	0.0247249	RESPONSE TO BACTERIUM	0.00294666	AMINO ACID METABOLIC PROCESS	5.26885e-19	INTRINSIC TO PLASMA MEMBRANE	3.42043e-14
PROTEIN KINASE REGULATOR ACTIVITY	0.0247249	REGULATION OF KINASE ACTIVITY	0.00297264	RECEPTOR ACTIVITY	5.2773e-19	ADHERENS JUNCTION	3.4635e-14
POSITIVE REGULATION OF CELL PROLIFERATION	0.0249564	CALMODULIN BINDING	0.00298537	CELL PROJECTION PART	5.43855e-19	ER GOLGI INTERMEDIATE COMPARTMENT	3.47839e-14
CHROMATIN REMODELING COMPLEX	0.0254598	SPERMATID DIFFERENTIATION	0.00298537	MICROTUBULE CYTOSKELETON ORGANIZATION AND BIOGENESIS	5.44634e-19	REGULATION OF PROGRAMMED CELL DEATH	3.48614e-14
MITOSIS	0.0255695	ACTIVE TRANSMEMBRANE TRANSPORTER ACTIVITY	0.0030242	ANION CATION SYMPORTER ACTIVITY	5.5622e-19	STEROID METABOLIC PROCESS	3.51338e-14
ORGANIC ACID METABOLIC PROCESS	0.0259094	HYDROLASE ACTIVITY ACTING ON ACID ANHYDRIDES	0.0030242	G PROTEIN SIGNALING ADENYLATE CYCLASE ACTIVATING PATHWAY	6.16358e-19	RUFFLE	3.84275e-14
PHOSPHOLIPID BIOSYNTHETIC PROCESS	0.0259094	NUCLEOBASENUCLEOSIDENUCLEOTIDE AND NUCLEIC ACID METABOLIC PROCESS	0.00313555	EXTRACELLULAR REGION PART	6.27132e-19	AXON	3.96245e-14
CASPASE ACTIVATION	0.0260991	INTEGRAL TO MEMBRANE	0.00316897	MONOOXYGENASE ACTIVITY	6.72549e-19	TRANSCRIPTION FACTOR COMPLEX	4.07251e-14
NEGATIVE REGULATION OF TRANSCRIPTION	0.0261949	VACUOLE	0.00318081	SIGNAL TRANSDUCTION	6.78222e-19	VIRAL INFECTIOUS CYCLE	4.15297e-14
REGULATION OF RNA METABOLIC PROCESS	0.0261949	REGULATION OF CELLULAR PH	0.00321463	SEROTONIN RECEPTOR ACTIVITY	6.86607e-19	CELL DEVELOPMENT	4.19204e-14
HYDROLASE ACTIVITY ACTING ON ACID ANHYDRIDES	0.0264403	POSITIVE REGULATION OF CELL PROLIFERATION	0.00322965	POSITIVE REGULATION OF DEVELOPMENTAL PROCESS	6.88532e-19	PHOSPHOINOSITIDE MEDIATED SIGNALING	4.29076e-14
HEPARIN BINDING	0.0265784	REGULATION OF CATABOLIC PROCESS	0.00323767	MACROMOLECULAR COMPLEX	7.01056e-19	SUBSTRATE SPECIFIC TRANSPORTER ACTIVITY	4.3365e-14
DNA DEPENDENT DNA REPLICATION	0.0272055	REGULATION OF NUCLEOBASENUCLEOSIDENUCLEOTIDE AND NUCLEIC ACID METABOLIC PROCESS	0.00325757	MICROSOME	7.45971e-19	POSITIVE REGULATION OF CELL DIFFERENTIATION	4.38555e-14
AGING	0.0278472	ESTABLISHMENT AND OR MAINTENANCE OF CHROMATIN ARCHITECTURE	0.00326437	VESICULAR FRACTION	7.45971e-19	DNA DIRECTED DNA POLYMERASE ACTIVITY	4.4691e-14
ANATOMICAL STRUCTURE MORPHOGENESIS	0.0279166	TISSUE DEVELOPMENT	0.00326437	REGULATION OF PROTEIN METABOLIC PROCESS	7.52188e-19	RIBOSOME	4.66206e-14
SPERMATID DEVELOPMENT	0.027961	CARBOXYLIC ACID TRANSMEMBRANE TRANSPORTER ACTIVITY	0.00328895	RHYTHMIC PROCESS	8.00454e-19	CELLULAR HOMEOSTASIS	4.66728e-14
TRANSITION METAL ION BINDING	0.027961	ORGANIC ACID TRANSMEMBRANE TRANSPORTER ACTIVITY	0.00328895	PROTEIN TYROSINE PHOSPHATASE ACTIVITY	8.18551e-19	REGULATION OF VIRAL REPRODUCTION	4.70802e-14
CARBOXYLIC ACID METABOLIC PROCESS	0.0289696	PEPTIDE RECEPTOR ACTIVITY	0.00330334	ENZYME INHIBITOR ACTIVITY	8.68454e-19	NEGATIVE REGULATION OF NUCLEOBASENUCLEOSIDENUCLEOTIDE AND NUCLEIC ACID METABOLIC PROCESS	4.85034e-14
DNA DEPENDENT ATPASE ACTIVITY	0.0289696	INOSITOL OR PHOSPHATIDYLINOSITOL KINASE ACTIVITY	0.00331019	SPERMATID DEVELOPMENT	9.38724e-19	PROTEIN LOCALIZATION	4.85034e-14
TRANSPORT	0.0295709	INTRINSIC TO MEMBRANE	0.00333498	LATE ENDOSOME	9.72925e-19	PLASMA MEMBRANE PART	4.87227e-14
NUCLEOBASENUCLEOSIDENUCLEOTIDE AND NUCLEIC ACID TRANSMEMBRANE TRANSPORTER ACTIVITY	0.029816	RNA POLYMERASE II TRANSCRIPTION FACTOR ACTIVITY	0.00334901	REGULATION OF PROTEIN STABILITY	1.01037e-18	ACTIN FILAMENT BASED PROCESS	4.95018e-14
REGULATION OF LYMPHOCYTE ACTIVATION	0.0300019	ACTIN FILAMENT BASED PROCESS	0.0033839	NEGATIVE REGULATION OF APOPTOSIS	1.11586e-18	PROTEIN DOMAIN SPECIFIC BINDING	4.98468e-14
KINESIN COMPLEX	0.0300353	INTRACELLULAR RECEPTOR MEDIATED SIGNALING PATHWAY	0.00341722	RECEPTOR MEDIATED ENDOCYTOSIS	1.14552e-18	EMBRYO IMPLANTATION	5.14786e-14
STEROID BIOSYNTHETIC PROCESS	0.0304656	REGULATION OF METABOLIC PROCESS	0.00341722	REGULATION OF NEUROTRANSMITTER LEVELS	1.23179e-18	STEROL BINDING	5.18167e-14
REGULATION OF TRANSCRIPTIONDNA DEPENDENT	0.0307262	STEROID HORMONE RECEPTOR SIGNALING PATHWAY	0.00341722	CELLULAR PROTEIN METABOLIC PROCESS	1.25673e-18	REGULATION OF T CELL ACTIVATION	5.28573e-14
NEGATIVE REGULATION OF CELLULAR METABOLIC PROCESS	0.0314746	ACETYLCHOLINE BINDING	0.00343883	MITOCHONDRION	1.2608e-18	BRAIN DEVELOPMENT	5.3312e-14
RNA POLYMERASE ACTIVITY	0.0314746	PROTEIN DNA COMPLEX ASSEMBLY	0.00343883	MUSCLE DEVELOPMENT	1.26157e-18	ENZYME LINKED RECEPTOR PROTEIN SIGNALING PATHWAY	5.80334e-14
PROTEIN TARGETING TO MITOCHONDRION	0.031851	CYTOSKELETON	0.00349436	ENDORIBONUCLEASE ACTIVITY	1.5808e-18	INTRACELLULAR TRANSPORT	5.90376e-14
JAK STAT CASCADE	0.0326903	MICROTUBULE	0.00353594	ENDOPEPTIDASE ACTIVITY	1.61736e-18	LIGASE ACTIVITY FORMING CARBON OXYGEN BONDS	6.15152e-14
ENZYME ACTIVATOR ACTIVITY	0.0327037	RESPONSE TO EXTRACELLULAR STIMULUS	0.00355597	ICOSANOID METABOLIC PROCESS	1.61828e-18	APICAL JUNCTION COMPLEX	6.2861e-14
POST GOLGI VESICLE MEDIATED TRANSPORT	0.0331942	DNA DAMAGE RESPONSESIGNAL TRANSDUCTION	0.0035921	TRANSMEMBRANE RECEPTOR PROTEIN SERINE THREONINE KINASE SIGNALING PATHWAY	1.63096e-18	APICOLATERAL PLASMA MEMBRANE	6.2861e-14
KINASE BINDING	0.0334067	NEURON DIFFERENTIATION	0.00361124	DYSTROPHIN ASSOCIATED GLYCOPROTEIN COMPLEX	1.67104e-18	RHO PROTEIN SIGNAL TRANSDUCTION	6.36101e-14
N ACETYLGLUCOSAMINE METABOLIC PROCESS	0.0334067	PROTEIN AMINO ACID O LINKED GLYCOSYLATION	0.00368505	SOLUBLE FRACTION	1.82323e-18	APICAL PLASMA MEMBRANE	6.47723e-14
MITOCHONDRIAL RESPIRATORY CHAIN COMPLEX I	0.0334121	ACTIN FILAMENT ORGANIZATION	0.00380504	BILE ACID METABOLIC PROCESS	1.8264e-18	ACUTE INFLAMMATORY RESPONSE	6.67023e-14
NADH DEHYDROGENASE COMPLEX	0.0334121	NEURON DEVELOPMENT	0.00383978	REGULATION OF T CELL ACTIVATION	1.83181e-18	SINGLE STRANDED RNA BINDING	6.67822e-14
ORGAN MORPHOGENESIS	0.0334121	AMINE BIOSYNTHETIC PROCESS	0.00385618	NEUROGENESIS	1.8372e-18	NUCLEAR PART	6.75906e-14
RESPIRATORY CHAIN COMPLEX I	0.0334121	SKELETAL DEVELOPMENT	0.00391233	PROTEIN METABOLIC PROCESS	1.8646e-18	CELL CORTEX	6.77206e-14
METALLOPEPTIDASE ACTIVITY	0.0335592	NUCLEAR SPECK	0.00391658	COFACTOR METABOLIC PROCESS	1.90819e-18	MAP KINASE KINASE KINASE ACTIVITY	6.80546e-14
PROTEASOME COMPLEX	0.0335592	VASCULATURE DEVELOPMENT	0.00391658	CELLULAR CATION HOMEOSTASIS	2.06553e-18	AMINE RECEPTOR ACTIVITY	6.93656e-14
REGULATION OF CYTOKINE PRODUCTION	0.0335592	DNA DAMAGE CHECKPOINT	0.00395609	DETECTION OF CHEMICAL STIMULUS	2.09973e-18	DNA DAMAGE CHECKPOINT	7.08301e-14
OXIDOREDUCTASE ACTIVITY ACTING ON NADH OR NADPH	0.03412	PLASMA MEMBRANE	0.00395609	GENE SILENCING	2.27842e-18	CATION BINDING	7.17098e-14
DNA DAMAGE RESPONSESIGNAL TRANSDUCTION	0.034223	HETEROPHILIC CELL ADHESION	0.00402559	SYMPORTER ACTIVITY	2.59577e-18	POSITIVE REGULATION OF DEVELOPMENTAL PROCESS	7.43044e-14
GLYCEROPHOSPHOLIPID BIOSYNTHETIC PROCESS	0.0344711	REGULATION OF TRANSLATIONAL INITIATION	0.00410204	LIPID METABOLIC PROCESS	2.80933e-18	STRUCTURAL CONSTITUENT OF CYTOSKELETON	7.52866e-14
NEURON DEVELOPMENT	0.0344711	INTERCALATED DISC	0.00414832	GALACTOSYLTRANSFERASE ACTIVITY	2.93694e-18	NUCLEAR LUMEN	7.68766e-14
DEFENSE RESPONSE TO BACTERIUM	0.0345398	TRANSMEMBRANE TRANSPORTER ACTIVITY	0.00425428	ENVELOPE	3.01679e-18	ACTIN FILAMENT	7.75441e-14
NEGATIVE REGULATION OF PHOSPHATE METABOLIC PROCESS	0.0345398	AMINE CATABOLIC PROCESS	0.00425874	ORGANELLE ENVELOPE	3.01679e-18	RESPONSE TO NUTRIENT	7.94109e-14
NEGATIVE REGULATION OF PHOSPHORYLATION	0.0345398	NUCLEOPLASM	0.00426376	CELLULAR MACROMOLECULE METABOLIC PROCESS	3.28292e-18	ALCOHOL METABOLIC PROCESS	8.07443e-14
RNA BIOSYNTHETIC PROCESS	0.0352536	VOLTAGE GATED CHANNEL ACTIVITY	0.00430626	CYTOKINE ACTIVITY	3.38552e-18	EXTRACELLULAR REGION	8.12203e-14
MICROSOME	0.0353683	ATPASE ACTIVITY COUPLED	0.00433429	INSOLUBLE FRACTION	3.41914e-18	CYTOPLASM	8.31212e-14
ORGANELLE ORGANIZATION AND BIOGENESIS	0.0353683	NITROGEN COMPOUND CATABOLIC PROCESS	0.00433429	LIPID BINDING	3.78073e-18	SMAD BINDING	8.3479e-14
TRANSCRIPTION DNA DEPENDENT	0.0353683	VIRAL GENOME REPLICATION	0.00433429	SKELETAL MUSCLE DEVELOPMENT	4.11263e-18	ANION TRANSMEMBRANE TRANSPORTER ACTIVITY	8.46105e-14
VESICULAR FRACTION	0.0353683	CONDENSED CHROMOSOME	0.00434544	KERATINOCYTE DIFFERENTIATION	4.25479e-18	REGULATION OF CATABOLIC PROCESS	8.46105e-14
REGULATION OF CELL CELL ADHESION	0.0354972	UBIQUITIN LIGASE COMPLEX	0.00434874	DNA INTEGRITY CHECKPOINT	4.402e-18	POSITIVE REGULATION OF CELL MIGRATION	8.5414e-14
HISTONE ACETYLTRANSFERASE ACTIVITY	0.036276	ORGAN DEVELOPMENT	0.00436509	CATION HOMEOSTASIS	4.79708e-18	CELL SURFACE RECEPTOR LINKED SIGNAL TRANSDUCTION GO 0007166	9.04309e-14
NEURITE DEVELOPMENT	0.0363699	RECEPTOR SIGNALING PROTEIN ACTIVITY	0.00446278	NEGATIVE REGULATION OF HYDROLASE ACTIVITY	4.96826e-18	PHOSPHOPROTEIN PHOSPHATASE ACTIVITY	9.29748e-14
CELL SOMA	0.0371075	LIPID HOMEOSTASIS	0.00446918	BASE EXCISION REPAIR	5.5219e-18	NUCLEAR CHROMATIN	9.47442e-14
MEMBRANE	0.0374047	SENSORY PERCEPTION OF TASTE	0.00448903	RESPONSE TO XENOBIOTIC STIMULUS	6.94168e-18	MEMBRANE	9.75299e-14
NEGATIVE REGULATION OF METABOLIC PROCESS	0.0375347	OXIDOREDUCTASE ACTIVITY ACTING ON NADH OR NADPH	0.00449643	DIGESTION	6.96959e-18	TASTE RECEPTOR ACTIVITY	9.81928e-14
TRANSCRIPTION REPRESSOR ACTIVITY	0.0380762	AMINO ACID CATABOLIC PROCESS	0.00457856	CELLULAR LIPID METABOLIC PROCESS	7.39439e-18	ATPASE ACTIVITY COUPLED	9.88632e-14
LEADING EDGE	0.0387677	PROTEIN MODIFICATION PROCESS	0.00461686	NUCLEAR CHROMOSOME PART	7.39439e-18	G1 PHASE	1.00237e-13
HEART DEVELOPMENT	0.038882	AMINO ACID TRANSMEMBRANE TRANSPORTER ACTIVITY	0.00465267	HETEROCYCLE METABOLIC PROCESS	8.12818e-18	G1 PHASE OF MITOTIC CELL CYCLE	1.00237e-13
NEGATIVE REGULATION OF CELLULAR PROCESS	0.038906	KINASE BINDING	0.00467568	OXIDOREDUCTASE ACTIVITY ACTING ON NADH OR NADPH	8.45783e-18	CIRCADIAN RHYTHM	1.00429e-13
CALCIUM INDEPENDENT CELL CELL ADHESION	0.0389396	RNA METABOLIC PROCESS	0.00467568	PHAGOCYTOSIS	8.45783e-18	KINASE ACTIVATOR ACTIVITY	1.00429e-13
CELL FRACTION	0.0389396	RESPONSE TO UV	0.00490651	PEPTIDASE ACTIVITY	8.50531e-18	TUBULIN BINDING	1.0191e-13
TRANSCRIPTION COREPRESSOR ACTIVITY	0.0389396	TRANSLATION INITIATION FACTOR ACTIVITY	0.00492539	RHO GTPASE ACTIVATOR ACTIVITY	8.70096e-18	TRANSMEMBRANE RECEPTOR PROTEIN SERINE THREONINE KINASE SIGNALING PATHWAY	1.07013e-13
GLYCOSAMINOGLYCAN BINDING	0.0394181	ANION TRANSMEMBRANE TRANSPORTER ACTIVITY	0.00498221	BIOGENIC AMINE METABOLIC PROCESS	8.76685e-18	PHOSPHORIC ESTER HYDROLASE ACTIVITY	1.10651e-13
POSITIVE REGULATION OF IMMUNE SYSTEM PROCESS	0.0395157	GAMETE GENERATION	0.00498221	PROTEIN DOMAIN SPECIFIC BINDING	8.83002e-18	FEEDING BEHAVIOR	1.11733e-13
STRUCTURAL MOLECULE ACTIVITY	0.0401665	SMALL CONJUGATING PROTEIN SPECIFIC PROTEASE ACTIVITY	0.00498221	CARBOHYDRATE METABOLIC PROCESS	9.03032e-18	VIRAL REPRODUCTION	1.16173e-13
PHOSPHOINOSITIDE MEDIATED SIGNALING	0.0417257	IONOTROPIC GLUTAMATE RECEPTOR ACTIVITY	0.00501466	POSITIVE REGULATION OF CELLULAR PROCESS	9.78218e-18	TRANSMEMBRANE RECEPTOR PROTEIN TYROSINE KINASE SIGNALING PATHWAY	1.16917e-13
REGULATION OF GENE EXPRESSION EPIGENETIC	0.0417257	CYTOPLASM	0.00519236	MICROTUBULE	9.95566e-18	MACROMOLECULE LOCALIZATION	1.21113e-13
PROTEIN SERINE THREONINE KINASE ACTIVITY	0.0421445	LIPID CATABOLIC PROCESS	0.00519236	PROTEIN COMPLEX ASSEMBLY	1.00852e-17	MITOTIC SPINDLE ORGANIZATION AND BIOGENESIS	1.21113e-13
GOLGI APPARATUS PART	0.0429697	NUCLEAR LUMEN	0.00519236	SERINE TYPE ENDOPEPTIDASE ACTIVITY	1.1851e-17	MYOBLAST DIFFERENTIATION	1.3136e-13
TRNA PROCESSING	0.0432563	NEGATIVE REGULATION OF SIGNAL TRANSDUCTION	0.00522824	CHROMOSOME SEGREGATION	1.20545e-17	CALMODULIN BINDING	1.34447e-13
LYSOSOME	0.0441086	ESTABLISHMENT OF CELLULAR LOCALIZATION	0.00526768	NEGATIVE REGULATION OF TRANSCRIPTION FACTOR ACTIVITY	1.20909e-17	REGULATION OF MUSCLE CONTRACTION	1.44686e-13
LYTIC VACUOLE	0.0441086	CELL FRACTION	0.00538663	VESICLE MEDIATED TRANSPORT	1.36404e-17	CATION TRANSMEMBRANE TRANSPORTER ACTIVITY	1.45778e-13
U12 DEPENDENT SPLICEOSOME	0.0441801	NEGATIVE REGULATION OF TRANSLATION	0.00543163	STRIATED MUSCLE DEVELOPMENT	1.37803e-17	ENDOPLASMIC RETICULUM LUMEN	1.48917e-13
REGULATION OF CYTOSKELETON ORGANIZATION AND BIOGENESIS	0.0443781	POSITIVE REGULATION OF CELL CYCLE	0.00543995	NUCLEAR EXPORT	1.69584e-17	KINASE BINDING	1.51576e-13
CHROMATIN	0.0447286	REGULATION OF TRANSFORMING GROWTH FACTOR BETA RECEPTOR SIGNALING PATHWAY	0.00543995	GLUCOSE CATABOLIC PROCESS	1.88423e-17	RESPONSE TO NUTRIENT LEVELS	1.5523e-13
PROTEIN DNA COMPLEX ASSEMBLY	0.0453761	MEMBRANE PART	0.00544475	REGULATION OF LYMPHOCYTE ACTIVATION	1.88423e-17	DNA DAMAGE RESPONSESIGNAL TRANSDUCTION	1.62786e-13
TRANSCRIPTION FACTOR BINDING	0.0453761	GENERATION OF NEURONS	0.0055901	ANION TRANSMEMBRANE TRANSPORTER ACTIVITY	1.90653e-17	NEUTRAL AMINO ACID TRANSPORT	1.62786e-13
EXCITATORY EXTRACELLULAR LIGAND GATED ION CHANNEL ACTIVITY	0.0455587	MACROMOLECULE LOCALIZATION	0.0055901	AMINE BIOSYNTHETIC PROCESS	1.94443e-17	PROTEIN POLYMERIZATION	1.64891e-13
EXTRACELLULAR LIGAND GATED ION CHANNEL ACTIVITY	0.0455587	ESTABLISHMENT OF LOCALIZATION	0.00572936	PERIPHERAL NERVOUS SYSTEM DEVELOPMENT	1.97743e-17	NEURON DIFFERENTIATION	1.69838e-13
LIPID BINDING	0.0458344	NUCLEUS	0.00572936	POLYSACCHARIDE BINDING	2.14109e-17	SYNAPSE PART	1.74699e-13
ANTI APOPTOSIS	0.0464036	RECEPTOR ACTIVITY	0.00572936	NUCLEAR CHROMOSOME	2.66159e-17	PROTEIN TARGETING	1.75775e-13
POSITIVE REGULATION OF MULTICELLULAR ORGANISMAL PROCESS	0.0464036	BIOPOLYMER MODIFICATION	0.00578786	CALCIUM MEDIATED SIGNALING	2.77721e-17	STRIATED MUSCLE DEVELOPMENT	1.90123e-13
CORNIFIED ENVELOPE	0.0474538	KERATINOCYTE DIFFERENTIATION	0.00584328	MACROMOLECULAR COMPLEX ASSEMBLY	3.2384e-17	REGULATION OF IMMUNE SYSTEM PROCESS	1.91337e-13
GLAND DEVELOPMENT	0.0474538	MAP KINASE KINASE KINASE ACTIVITY	0.00584623	VOLTAGE GATED POTASSIUM CHANNEL ACTIVITY	3.40336e-17	G1 S TRANSITION OF MITOTIC CELL CYCLE	1.96121e-13
TRANSCRIPTION FACTOR COMPLEX	0.0476354	NICOTINIC ACETYLCHOLINE ACTIVATED CATION SELECTIVE CHANNEL ACTIVITY	0.00584795	REGULATION OF IMMUNE EFFECTOR PROCESS	3.82631e-17	ANGIOGENESIS	2.06404e-13
CATION TRANSPORTING ATPASE ACTIVITY	0.0483039	NICOTINIC ACETYLCHOLINE GATED RECEPTOR CHANNEL COMPLEX	0.00584795	CORTICAL ACTIN CYTOSKELETON	4.12851e-17	APOPTOTIC PROGRAM	2.06665e-13
CELLULAR PROTEIN CATABOLIC PROCESS	0.0483039	PROTEIN CATABOLIC PROCESS	0.00590406	NEGATIVE REGULATION OF BINDING	4.34204e-17	INTEGRIN COMPLEX	2.29256e-13
ENZYME INHIBITOR ACTIVITY	0.0483039	POSITIVE REGULATION OF RESPONSE TO STIMULUS	0.00593174	NEGATIVE REGULATION OF DNA BINDING	4.34204e-17	MEMBRANE PART	2.29314e-13
ION BINDING	0.0483039	SEXUAL REPRODUCTION	0.00593174	NUCLEAR TRANSPORT	4.34204e-17	REGULATION OF BIOLOGICAL QUALITY	2.30311e-13
NUCLEOPLASM PART	0.0497527	ACTIN BINDING	0.00596626	NUCLEOCYTOPLASMIC TRANSPORT	4.34204e-17	ACTIN FILAMENT BINDING	2.3793e-13
INTERCALATED DISC	0.0500204	NUCLEAR CHROMOSOME	0.00596626	SECRETION	4.34204e-17	NEURON PROJECTION	2.3793e-13
APICAL JUNCTION COMPLEX	0.0501502	INTERLEUKIN 8 BIOSYNTHETIC PROCESS	0.00599467	IMMUNE SYSTEM PROCESS	4.43218e-17	DEVELOPMENT OF PRIMARY SEXUAL CHARACTERISTICS	2.38008e-13
APICOLATERAL PLASMA MEMBRANE	0.0501502	INTERLEUKIN 8 PRODUCTION	0.00599467	POSITIVE REGULATION OF BIOLOGICAL PROCESS	4.43218e-17	G PROTEIN SIGNALING ADENYLATE CYCLASE ACTIVATING PATHWAY	2.43286e-13
HYDROLASE ACTIVITY HYDROLYZING O GLYCOSYL COMPOUNDS	0.0504336	CYTOPLASMIC PART	0.00600137	SECRETION BY CELL	4.6025e-17	CELL FRACTION	2.45745e-13
IDENTICAL PROTEIN BINDING	0.0504336	RECEPTOR COMPLEX	0.00600137	N ACETYLGLUCOSAMINE METABOLIC PROCESS	5.58006e-17	RESPONSE TO WOUNDING	2.46771e-13
INTRACELLULAR NON MEMBRANE BOUND ORGANELLE	0.0504336	REGULATION OF IMMUNE EFFECTOR PROCESS	0.00600137	APOPTOSIS GO	6.12333e-17	RESPONSE TO STEROID HORMONE STIMULUS	2.47147e-13
NEGATIVE REGULATION OF BIOLOGICAL PROCESS	0.0504336	CYTOKINE AND CHEMOKINE MEDIATED SIGNALING PATHWAY	0.00602783	EXTRACELLULAR REGION	6.85635e-17	APOPTOTIC NUCLEAR CHANGES	2.50038e-13
NON MEMBRANE BOUND ORGANELLE	0.0504336	ICOSANOID METABOLIC PROCESS	0.00602783	CHROMATIN	6.90512e-17	NUCLEAR MEMBRANE	2.50038e-13
PHOSPHORYLATION	0.0504336	ACTIN FILAMENT BASED MOVEMENT	0.00614905	RNA SPLICING FACTOR ACTIVITYTRANSESTERIFICATION MECHANISM	6.90512e-17	PORE COMPLEX	2.58148e-13
REGULATION OF PROTEIN KINASE ACTIVITY	0.0504336	MEMBRANE	0.00615528	PEPTIDE RECEPTOR ACTIVITY	7.81879e-17	HORMONE RECEPTOR BINDING	2.65682e-13
CARBOHYDRATE KINASE ACTIVITY	0.0509575	PROTEIN COMPLEX	0.00615528	GOLGI APPARATUS PART	8.02048e-17	NEGATIVE REGULATION OF CELL CYCLE	2.70447e-13
POSITIVE REGULATION OF IMMUNE RESPONSE	0.0510668	MICROVILLUS	0.00616994	EXOPEPTIDASE ACTIVITY	8.74209e-17	ZINC ION BINDING	2.70447e-13
CALCIUM ION TRANSMEMBRANE TRANSPORTER ACTIVITY	0.0527102	SENSORY PERCEPTION	0.00616994	NUCLEOBASENUCLEOSIDENUCLEOTIDE AND NUCLEIC ACID TRANSPORT	8.90813e-17	MEMBRANE ENCLOSED LUMEN	2.76381e-13
SPINDLE MICROTUBULE	0.0537384	DEVELOPMENT OF PRIMARY SEXUAL CHARACTERISTICS	0.00621262	INTRACELLULAR SIGNALING CASCADE	8.94177e-17	ORGANELLE LUMEN	2.76381e-13
CELLULAR RESPONSE TO STIMULUS	0.0543603	HYDROLASE ACTIVITY HYDROLYZING O GLYCOSYL COMPOUNDS	0.00624845	COENZYME BIOSYNTHETIC PROCESS	9.63343e-17	G PROTEIN SIGNALING COUPLED TO IP3 SECOND MESSENGERPHOSPHOLIPASE C ACTIVATING	2.79123e-13
SMALL GTPASE BINDING	0.0546547	CELLULAR LIPID CATABOLIC PROCESS	0.00637844	CELLULAR COMPONENT ASSEMBLY	1.09529e-16	OXIDOREDUCTASE ACTIVITY ACTING ON NADH OR NADPH	2.80236e-13
APOPTOTIC MITOCHONDRIAL CHANGES	0.0559451	POSITIVE REGULATION OF CYTOKINE PRODUCTION	0.00639897	CYTOKINE PRODUCTION	1.13493e-16	NUCLEAR MEMBRANE PART	2.91495e-13
REGULATION OF TRANSCRIPTION	0.0567639	STEROID BIOSYNTHETIC PROCESS	0.00647367	ACTIVATION OF MAPK ACTIVITY	1.16563e-16	DNA PACKAGING	3.2213e-13
RNA POLYMERASE II TRANSCRIPTION FACTOR ACTIVITY	0.0567639	REGULATION OF MULTICELLULAR ORGANISMAL PROCESS	0.00659352	LIGAND DEPENDENT NUCLEAR RECEPTOR ACTIVITY	1.17853e-16	POSITIVE REGULATION OF IMMUNE RESPONSE	3.29587e-13
ENERGY DERIVATION BY OXIDATION OF ORGANIC COMPOUNDS	0.0568582	BIOPOLYMER METABOLIC PROCESS	0.00680812	CALCIUM ION BINDING	1.26604e-16	NEGATIVE REGULATION OF DEVELOPMENTAL PROCESS	3.38752e-13
POST TRANSLATIONAL PROTEIN MODIFICATION	0.0568582	TRANSPORT	0.00680812	RESPONSE TO STRESS	1.28813e-16	RECEPTOR SIGNALING PROTEIN ACTIVITY	3.41857e-13
PROTEIN MODIFICATION BY SMALL PROTEIN CONJUGATION	0.0578214	NEGATIVE REGULATION OF PROGRAMMED CELL DEATH	0.00708058	HEMATOPOIETIN INTERFERON CLASSD200 DOMAIN CYTOKINE RECEPTOR BINDING	1.35307e-16	NUCLEAR UBIQUITIN LIGASE COMPLEX	3.43103e-13
TRANS GOLGI NETWORK	0.0594484	SUBSTRATE SPECIFIC TRANSMEMBRANE TRANSPORTER ACTIVITY	0.00719447	GENERATION OF NEURONS	1.42418e-16	INTERCELLULAR JUNCTION ASSEMBLY AND MAINTENANCE	3.46011e-13
PROTEIN UBIQUITINATION	0.0596288	PROTEIN HOMOOLIGOMERIZATION	0.00733209	FOCAL ADHESION FORMATION	1.49144e-16	NUCLEAR ENVELOPE	3.48571e-13
SENSORY ORGAN DEVELOPMENT	0.0596288	STRUCTURAL CONSTITUENT OF CYTOSKELETON	0.00741475	MITOCHONDRIAL ENVELOPE	1.55839e-16	DOUBLE STRANDED RNA BINDING	3.53051e-13
NOTCH SIGNALING PATHWAY	0.0598226	EXTRACELLULAR REGION	0.00758747	LOCOMOTORY BEHAVIOR	1.74056e-16	STRUCTURAL CONSTITUENT OF RIBOSOME	3.59872e-13
CELL FATE COMMITMENT	0.0598709	NEURITE DEVELOPMENT	0.00764865	LIPID BIOSYNTHETIC PROCESS	1.82482e-16	LIPID HOMEOSTASIS	3.63883e-13
TRANSCRIPTION	0.0603216	TRANSITION METAL ION BINDING	0.00764865	SODIUM CHANNEL ACTIVITY	1.8455e-16	RESPONSE TO DRUG	3.92558e-13
REGULATION OF BIOLOGICAL QUALITY	0.060523	RNA EXPORT FROM NUCLEUS	0.00765034	CELLULAR HOMEOSTASIS	1.86345e-16	GLYCOPROTEIN BIOSYNTHETIC PROCESS	4.14525e-13
INSULIN LIKE GROWTH FACTOR RECEPTOR BINDING	0.062079	CIRCADIAN RHYTHM	0.00766351	POSITIVE REGULATION OF TRANSCRIPTIONDNA DEPENDENT	1.86874e-16	NUCLEAR ORGANIZATION AND BIOGENESIS	4.16555e-13
GLUCOSE CATABOLIC PROCESS	0.0621809	RESPONSE TO DNA DAMAGE STIMULUS	0.00766351	ENDONUCLEASE ACTIVITY	1.90209e-16	ESTABLISHMENT OF CELLULAR LOCALIZATION	4.34774e-13
REGULATION OF PROTEIN SECRETION	0.0631926	MONOOXYGENASE ACTIVITY	0.0076957	SMAD BINDING	1.93295e-16	PROTEIN AMINO ACID O LINKED GLYCOSYLATION	4.54547e-13
DNA RECOMBINATION	0.0633208	LEADING EDGE	0.00773537	GTP BINDING	2.0382e-16	REPLICATION FORK	4.64694e-13
NEGATIVE REGULATION OF CELLULAR PROTEIN METABOLIC PROCESS	0.0633208	PEPTIDASE ACTIVITY	0.00778203	GUANYL NUCLEOTIDE BINDING	2.0382e-16	SIGNAL TRANSDUCTION	4.65343e-13
POSITIVE REGULATION OF PHOSPHORYLATION	0.0637225	REGULATION OF IMMUNE SYSTEM PROCESS	0.00778203	KINASE BINDING	2.06793e-16	METALLOPEPTIDASE ACTIVITY	4.68617e-13
ANION TRANSPORT	0.0637756	MYOSIN COMPLEX	0.00779761	INTEGRIN COMPLEX	2.2315e-16	DNA DEPENDENT DNA REPLICATION	4.72421e-13
CELLULAR LOCALIZATION	0.065235	INTRACELLULAR NON MEMBRANE BOUND ORGANELLE	0.00785863	POSITIVE REGULATION OF NUCLEOBASENUCLEOSIDENUCLEOTIDE AND NUCLEIC ACID METABOLIC PROCESS	2.23319e-16	REGULATION OF DEVELOPMENTAL PROCESS	4.83091e-13
POSITIVE REGULATION OF CYTOKINE SECRETION	0.065235	ION HOMEOSTASIS	0.00785863	SENSORY PERCEPTION	2.35961e-16	RHODOPSIN LIKE RECEPTOR ACTIVITY	5.21478e-13
STRUCTURAL CONSTITUENT OF CYTOSKELETON	0.065235	NON MEMBRANE BOUND ORGANELLE	0.00785863	CHROMATIN REMODELING	3.07853e-16	ANION CHANNEL ACTIVITY	5.26789e-13
SYMPORTER ACTIVITY	0.0655958	OVULATION CYCLE	0.00785863	POSITIVE REGULATION OF TRANSCRIPTION	3.13487e-16	GENE SILENCING	5.26789e-13
NUCLEAR CHROMOSOME	0.0658566	CELL SURFACE RECEPTOR LINKED SIGNAL TRANSDUCTION GO 0007166	0.00787256	PROTEASOME COMPLEX	3.20863e-16	ENDORIBONUCLEASE ACTIVITY	5.3701e-13
VACUOLE	0.0661041	GLYCOPROTEIN BIOSYNTHETIC PROCESS	0.00787256	POSITIVE REGULATION OF CELLULAR METABOLIC PROCESS	3.62576e-16	ESTABLISHMENT OF LOCALIZATION	5.5074e-13
CHROMOSOMEPERICENTRIC REGION	0.0674971	PROTEIN POLYMERIZATION	0.00789722	EXTRACELLULAR SPACE	3.77231e-16	POSITIVE REGULATION OF LYMPHOCYTE ACTIVATION	5.82297e-13
CELL MATRIX ADHESION	0.0681015	ION BINDING	0.00793735	VOLTAGE GATED SODIUM CHANNEL ACTIVITY	3.8023e-16	REGULATION OF LYMPHOCYTE ACTIVATION	5.85045e-13
CONDENSED NUCLEAR CHROMOSOME	0.068197	INTRACELLULAR ORGANELLE PART	0.00795754	REGULATION OF TRANSCRIPTION FACTOR ACTIVITY	4.4159e-16	ACETYLCHOLINE BINDING	6.05139e-13
GLYCEROPHOSPHOLIPID METABOLIC PROCESS	0.0685022	ORGANELLE PART	0.00795754	CHEMOKINE ACTIVITY	4.56595e-16	POSITIVE REGULATION OF CELL PROLIFERATION	6.05139e-13
NEGATIVE REGULATION OF NUCLEOBASENUCLEOSIDENUCLEOTIDE AND NUCLEIC ACID METABOLIC PROCESS	0.0685022	HYDROLASE ACTIVITY ACTING ON CARBON NITROGEN NOT PEPTIDEBONDSIN LINEAR AMIDES	0.00809049	CHEMOKINE RECEPTOR BINDING	4.56595e-16	TRANSFORMING GROWTH FACTOR BETA RECEPTOR SIGNALING PATHWAY	6.05139e-13
RIBOSOME BIOGENESIS AND ASSEMBLY	0.0685022	CELL CORTEX	0.00813898	POSITIVE REGULATION OF RNA METABOLIC PROCESS	4.69807e-16	INOSITOL OR PHOSPHATIDYLINOSITOL KINASE ACTIVITY	6.16492e-13
RRNA METABOLIC PROCESS	0.0685022	G1 PHASE	0.00813898	CARBOXY LYASE ACTIVITY	5.04241e-16	CELL CYCLE ARREST GO 0007050	6.18938e-13
RRNA PROCESSING	0.0685022	G1 PHASE OF MITOTIC CELL CYCLE	0.00813898	RESPONSE TO EXTERNAL STIMULUS	5.43138e-16	N ACETYLGLUCOSAMINE METABOLIC PROCESS	6.25868e-13
RESPONSE TO UV	0.0685526	SPERMATID DEVELOPMENT	0.00813898	REGULATION OF HYDROLASE ACTIVITY	5.47475e-16	RHYTHMIC PROCESS	7.05244e-13
RESPONSE TO OTHER ORGANISM	0.0686612	TRANS GOLGI NETWORK	0.00815741	CALCIUM INDEPENDENT CELL CELL ADHESION	5.5318e-16	POSITIVE REGULATION OF TRANSFERASE ACTIVITY	7.16508e-13
REGULATION OF ORGANELLE ORGANIZATION AND BIOGENESIS	0.0687109	GLYCOPROTEIN CATABOLIC PROCESS	0.00819838	DNA CATABOLIC PROCESS	5.87223e-16	LEADING EDGE	7.74752e-13
INORGANIC ANION TRANSMEMBRANE TRANSPORTER ACTIVITY	0.0694151	EXTRINSIC TO PLASMA MEMBRANE	0.00829897	G1 PHASE	6.10948e-16	GOLGI VESICLE TRANSPORT	7.8589e-13
ENZYME BINDING	0.0704044	IMMUNE SYSTEM PROCESS	0.0083538	G1 PHASE OF MITOTIC CELL CYCLE	6.10948e-16	POSITIVE REGULATION OF PHOSPHORYLATION	7.87628e-13
GROWTH FACTOR BINDING	0.0705059	CYTOSKELETAL PROTEIN BINDING	0.00842292	POSITIVE REGULATION OF METABOLIC PROCESS	6.88363e-16	RESPONSE TO STRESS	7.96532e-13
PROTEIN C TERMINUS BINDING	0.0705059	RESPONSE TO EXTERNAL STIMULUS	0.00842292	CELLULAR RESPONSE TO STIMULUS	6.984e-16	POSITIVE REGULATION OF PHOSPHATE METABOLIC PROCESS	8.15168e-13
REGULATION OF KINASE ACTIVITY	0.070635	PROTEIN DOMAIN SPECIFIC BINDING	0.00845401	CHROMOSOMEPERICENTRIC REGION	7.11955e-16	AMINE BIOSYNTHETIC PROCESS	8.28561e-13
VIRAL INFECTIOUS CYCLE	0.070635	METALLOENDOPEPTIDASE ACTIVITY	0.00853909	POSITIVE REGULATION OF HYDROLASE ACTIVITY	7.13222e-16	NEGATIVE REGULATION OF APOPTOSIS	8.6711e-13
MAINTENANCE OF CELLULAR LOCALIZATION	0.0717096	CENTROSOME CYCLE	0.00861134	ATPASE ACTIVITY COUPLED TO MOVEMENT OF SUBSTANCES	7.23279e-16	GLYCOPROTEIN METABOLIC PROCESS	8.75108e-13
MAINTENANCE OF CELLULAR PROTEIN LOCALIZATION	0.0717096	POTASSIUM ION TRANSPORT	0.00869669	HYDROLASE ACTIVITY ACTING ON ACID ANHYDRIDESCATALYZING TRANSMEMBRANE MOVEMENT OF SUBSTANCES	7.23279e-16	FATTY ACID BETA OXIDATION	8.89632e-13
NEGATIVE REGULATION OF MYELOID CELL DIFFERENTIATION	0.0722935	PROTEIN LOCALIZATION	0.00869669	PRIMARY ACTIVE TRANSMEMBRANE TRANSPORTER ACTIVITY	7.23279e-16	CHROMATIN BINDING	9.02689e-13
PHOSPHOINOSITIDE BIOSYNTHETIC PROCESS	0.0727555	CELLULAR RESPONSE TO STRESS	0.00881376	CARBOHYDRATE BINDING	7.26578e-16	REGULATION OF APOPTOSIS	9.15023e-13
POSITIVE REGULATION OF DEVELOPMENTAL PROCESS	0.0727555	INTRACELLULAR TRANSPORT	0.00912536	POTASSIUM ION TRANSPORT	7.31548e-16	CYTOSOL	9.24475e-13
ZINC ION BINDING	0.0727555	SUBSTRATE SPECIFIC TRANSPORTER ACTIVITY	0.00937383	NUCLEAR BODY	7.39273e-16	ONE CARBON COMPOUND METABOLIC PROCESS	9.90043e-13
REGULATION OF JNK CASCADE	0.0736682	MEMBRANE ENCLOSED LUMEN	0.00944958	REGULATION OF PROTEIN POLYMERIZATION	7.82336e-16	NUCLEAR EXPORT	9.98741e-13
PROTEIN KINASE BINDING	0.0742015	ORGANELLE LUMEN	0.00944958	PROTEIN IMPORT	8.24096e-16	NEGATIVE REGULATION OF CELLULAR PROTEIN METABOLIC PROCESS	1.01318e-12
RNA METABOLIC PROCESS	0.0742015	PROTEASOME COMPLEX	0.00944958	COFACTOR CATABOLIC PROCESS	8.413e-16	NEGATIVE REGULATION OF PROTEIN METABOLIC PROCESS	1.01318e-12
SMALL CONJUGATING PROTEIN SPECIFIC PROTEASE ACTIVITY	0.0746362	NUCLEAR BODY	0.00960591	CARBOXYLIC ACID TRANSMEMBRANE TRANSPORTER ACTIVITY	8.58779e-16	ANTIOXIDANT ACTIVITY	1.08868e-12
GENERATION OF A SIGNAL INVOLVED IN CELL CELL SIGNALING	0.0750641	ORGAN MORPHOGENESIS	0.00978448	ORGANIC ACID TRANSMEMBRANE TRANSPORTER ACTIVITY	8.58779e-16	MONOOXYGENASE ACTIVITY	1.09902e-12
MONOSACCHARIDE TRANSMEMBRANE TRANSPORTER ACTIVITY	0.0753523	HEMOSTASIS	0.00981367	POSITIVE REGULATION OF PROTEIN AMINO ACID PHOSPHORYLATION	8.61259e-16	COPPER ION BINDING	1.11935e-12
PROTEIN POLYUBIQUITINATION	0.0760929	ACETYLGLUCOSAMINYLTRANSFERASE ACTIVITY	0.0100086	CLATHRIN COATED VESICLE	8.78344e-16	SMALL CONJUGATING PROTEIN BINDING	1.1385e-12
IMMUNE SYSTEM PROCESS	0.07616	SECONDARY ACTIVE TRANSMEMBRANE TRANSPORTER ACTIVITY	0.0102375	ELECTRON TRANSPORT GO 0006118	8.83433e-16	UBIQUITIN BINDING	1.1385e-12
PATTERN SPECIFICATION PROCESS	0.0762313	NUCLEAR PART	0.0103454	SMALL CONJUGATING PROTEIN SPECIFIC PROTEASE ACTIVITY	9.04951e-16	NUCLEAR BODY	1.14266e-12
REGULATION OF NUCLEOBASENUCLEOSIDENUCLEOTIDE AND NUCLEIC ACID METABOLIC PROCESS	0.0762897	REPRODUCTION	0.0103804	TRANSFORMING GROWTH FACTOR BETA RECEPTOR SIGNALING PATHWAY	9.06481e-16	RESPONSE TO EXTERNAL STIMULUS	1.18206e-12
CYTOPLASMIC VESICLE	0.0765272	SODIUM ION TRANSPORT	0.0103804	PROTEIN AMINO ACID ADP RIBOSYLATION	9.12198e-16	TRANSPORT	1.1873e-12
S PHASE	0.0774341	AMINE TRANSMEMBRANE TRANSPORTER ACTIVITY	0.0106972	POSITIVE REGULATION OF MAP KINASE ACTIVITY	9.16719e-16	CARBOHYDRATE BINDING	1.1977e-12
T CELL ACTIVATION	0.0774341	RIBONUCLEOTIDE METABOLIC PROCESS	0.0107368	REGULATION OF T CELL PROLIFERATION	9.91392e-16	NUCLEAR HORMONE RECEPTOR BINDING	1.20193e-12
PHAGOCYTOSIS	0.0776275	TRNA METABOLIC PROCESS	0.0107368	T CELL PROLIFERATION	9.91392e-16	PROTEIN HOMOOLIGOMERIZATION	1.21406e-12
ICOSANOID METABOLIC PROCESS	0.0778707	PROTEIN SERINE THREONINE PHOSPHATASE ACTIVITY	0.0108556	AMINOPEPTIDASE ACTIVITY	1.02475e-15	GENERATION OF PRECURSOR METABOLITES AND ENERGY	1.23689e-12
REGULATION OF TRANSFERASE ACTIVITY	0.0778707	DNA BINDING	0.0109436	CYTOSOLIC PART	1.1173e-15	SYNAPSE	1.2604e-12
REGULATION OF INTRACELLULAR TRANSPORT	0.0782477	GOLGI VESICLE TRANSPORT	0.0110319	AMINO ACID DERIVATIVE BIOSYNTHETIC PROCESS	1.19061e-15	REGULATION OF HYDROLASE ACTIVITY	1.29712e-12
CARBOHYDRATE METABOLIC PROCESS	0.0794398	SIGNAL TRANSDUCTION	0.0110319	NUCLEAR SPECK	1.24765e-15	SPECIFIC RNA POLYMERASE II TRANSCRIPTION FACTOR ACTIVITY	1.29905e-12
PERINUCLEAR REGION OF CYTOPLASM	0.0800269	REGULATION OF GENE SPECIFIC TRANSCRIPTION	0.0111153	BIOSYNTHETIC PROCESS	1.30455e-15	PEPTIDYL TYROSINE MODIFICATION	1.38052e-12
NUCLEOPLASM	0.0806074	AMYLOID PRECURSOR PROTEIN METABOLIC PROCESS	0.0114581	REGULATION OF BIOLOGICAL QUALITY	1.40978e-15	POSITIVE REGULATION OF CELL CYCLE	1.38052e-12
PROTEIN AMINO ACID N LINKED GLYCOSYLATION	0.0806074	REGULATION OF BODY FLUID LEVELS	0.0114581	PATTERN BINDING	1.44163e-15	T CELL PROLIFERATION	1.38052e-12
CYTOPLASMIC MEMBRANE BOUND VESICLE	0.0808557	TRANSCRIPTION FACTOR COMPLEX	0.0114581	NEGATIVE REGULATION OF BIOSYNTHETIC PROCESS	1.61964e-15	PROTEIN COMPLEX	1.4037e-12
MITOCHONDRIAL TRANSPORT	0.0819788	TRANSMEMBRANE RECEPTOR PROTEIN TYROSINE KINASE SIGNALING PATHWAY	0.0120923	NEGATIVE REGULATION OF CELLULAR BIOSYNTHETIC PROCESS	1.61964e-15	ION HOMEOSTASIS	1.4257e-12
MEMBRANE BOUND VESICLE	0.0825513	CELL DEVELOPMENT	0.0123472	NEGATIVE REGULATION OF TRANSLATION	1.61964e-15	REGULATION OF TRANSFORMING GROWTH FACTOR BETA RECEPTOR SIGNALING PATHWAY	1.44371e-12
POSITIVE REGULATION OF LYMPHOCYTE ACTIVATION	0.0832883	REPRODUCTIVE PROCESS	0.0124636	REGULATION OF ACTION POTENTIAL	1.72637e-15	LYASE ACTIVITY	1.46237e-12
TRANSFERASE ACTIVITY TRANSFERRING ALKYL OR ARYLOTHER THAN METHYLGROUPS	0.0835921	TRANSFERASE ACTIVITY TRANSFERRING ALKYL OR ARYLOTHER THAN METHYLGROUPS	0.0125226	RESPONSE TO HYPOXIA	1.83812e-15	MONOVALENT INORGANIC CATION TRANSPORT	1.48741e-12
MUSCLE DEVELOPMENT	0.0849629	CELL SUBSTRATE ADHESION	0.0125802	POSITIVE REGULATION OF MULTICELLULAR ORGANISMAL PROCESS	1.88488e-15	COENZYME METABOLIC PROCESS	1.56033e-12
ANATOMICAL STRUCTURE FORMATION	0.0855911	METALLOEXOPEPTIDASE ACTIVITY	0.0125802	AMINE TRANSMEMBRANE TRANSPORTER ACTIVITY	1.95779e-15	VIRAL REPRODUCTIVE PROCESS	1.56565e-12
TRANSMEMBRANE RECEPTOR PROTEIN TYROSINE KINASE SIGNALING PATHWAY	0.0863123	NUCLEAR CHROMATIN	0.012607	REGULATION OF BODY FLUID LEVELS	1.9932e-15	NUCLEOLUS	1.60995e-12
PROTEIN TYROSINE PHOSPHATASE ACTIVITY	0.0865636	EXCITATORY EXTRACELLULAR LIGAND GATED ION CHANNEL ACTIVITY	0.0126534	POSITIVE REGULATION OF T CELL PROLIFERATION	2.40184e-15	INFLAMMATORY RESPONSE	1.68575e-12
CYTOKINE SECRETION	0.0871537	EXTRACELLULAR LIGAND GATED ION CHANNEL ACTIVITY	0.0126534	REGULATION OF CELL MIGRATION	2.64275e-15	SPERMATID DEVELOPMENT	1.69082e-12
REGULATION OF CYTOKINE SECRETION	0.0871537	INTERCELLULAR JUNCTION ASSEMBLY AND MAINTENANCE	0.0126795	MITOCHONDRIAL MEMBRANE	2.64362e-15	MACROMOLECULE CATABOLIC PROCESS	1.70049e-12
CONDENSED CHROMOSOME	0.0873906	REGULATION OF TRANSPORT	0.0127152	MEIOTIC CELL CYCLE	2.77242e-15	LOCOMOTORY BEHAVIOR	1.71753e-12
REGULATION OF GENE EXPRESSION	0.0873906	CONDENSED NUCLEAR CHROMOSOME	0.012745	MITOCHONDRIAL PART	2.98855e-15	GUANYL NUCLEOTIDE EXCHANGE FACTOR ACTIVITY	1.77009e-12
NEGATIVE REGULATION OF PROTEIN METABOLIC PROCESS	0.0882027	STRUCTURAL CONSTITUENT OF RIBOSOME	0.012745	MICROTUBULE ASSOCIATED COMPLEX	3.11929e-15	CALCIUM MEDIATED SIGNALING	1.84154e-12
NEGATIVE REGULATION OF RESPONSE TO STIMULUS	0.0882027	ARYLSULFATASE ACTIVITY	0.0129837	REGULATION OF CATABOLIC PROCESS	3.30937e-15	MEIOTIC CELL CYCLE	1.96332e-12
ESTABLISHMENT AND OR MAINTENANCE OF CHROMATIN ARCHITECTURE	0.0884402	AXON	0.0130443	PORE COMPLEX	3.48885e-15	MEIOTIC RECOMBINATION	1.97729e-12
REGULATION OF CELLULAR METABOLIC PROCESS	0.0884402	POSITIVE REGULATION OF TRANSFERASE ACTIVITY	0.0131155	LIGASE ACTIVITY FORMING CARBON OXYGEN BONDS	3.64871e-15	POSITIVE REGULATION OF T CELL ACTIVATION	1.97729e-12
CARBOXYLESTERASE ACTIVITY	0.0890174	POSITIVE REGULATION OF T CELL ACTIVATION	0.0134645	EXTRACELLULAR STRUCTURE ORGANIZATION AND BIOGENESIS	3.6827e-15	BASE EXCISION REPAIR	2.0611e-12
SYNAPSE	0.0893769	UBIQUITIN CYCLE	0.0136311	CYSTEINE TYPE PEPTIDASE ACTIVITY	3.89044e-15	FATTY ACID BIOSYNTHETIC PROCESS	2.06604e-12
TRANSCRIPTION FROM RNA POLYMERASE III PROMOTER	0.0893974	CELL SOMA	0.0136655	ACTIN FILAMENT BINDING	3.94376e-15	RNA CATABOLIC PROCESS	2.09403e-12
RIBOSOMAL SUBUNIT	0.0898338	RESPONSE TO STRESS	0.0137005	REGULATION OF DEFENSE RESPONSE	3.99485e-15	ANATOMICAL STRUCTURE FORMATION	2.3805e-12
PEPTIDYL TYROSINE MODIFICATION	0.0906182	NEUTRAL AMINO ACID TRANSMEMBRANE TRANSPORTER ACTIVITY	0.0139023	REGULATION OF PROTEIN MODIFICATION PROCESS	4.27774e-15	DNA CATABOLIC PROCESS	2.53692e-12
VESICLE	0.0906182	FATTY ACID METABOLIC PROCESS	0.0141056	ION HOMEOSTASIS	5.3071e-15	EXTRACELLULAR MATRIX PART	2.54709e-12
UBIQUITIN CYCLE	0.0906842	REGULATION OF PROGRAMMED CELL DEATH	0.0141673	REGULATION OF PROTEIN AMINO ACID PHOSPHORYLATION	6.03579e-15	VITAMIN BINDING	2.55391e-12
RESPONSE TO EXTERNAL STIMULUS	0.0911519	PROTEIN IMPORT INTO NUCLEUS TRANSLOCATION	0.0144824	LIPID TRANSPORTER ACTIVITY	6.55198e-15	BIOPOLYMER CATABOLIC PROCESS	2.66773e-12
SERINE HYDROLASE ACTIVITY	0.0916294	PEPTIDYL TYROSINE MODIFICATION	0.0145776	CARBOHYDRATE KINASE ACTIVITY	7.25551e-15	MALE GONAD DEVELOPMENT	2.67406e-12
SERINE TYPE PEPTIDASE ACTIVITY	0.0916294	STEROID METABOLIC PROCESS	0.0147171	G PROTEIN SIGNALING COUPLED TO IP3 SECOND MESSENGERPHOSPHOLIPASE C ACTIVATING	7.47346e-15	NUCLEOTIDYLTRANSFERASE ACTIVITY	2.69799e-12
G PROTEIN SIGNALING COUPLED TO IP3 SECOND MESSENGERPHOSPHOLIPASE C ACTIVATING	0.0936321	DEFENSE RESPONSE TO VIRUS	0.0151467	PHOSPHOINOSITIDE MEDIATED SIGNALING	7.47346e-15	CARBOHYDRATE METABOLIC PROCESS	2.78448e-12
POSITIVE REGULATION OF CASPASE ACTIVITY	0.0936321	REGULATION OF CELLULAR PROTEIN METABOLIC PROCESS	0.0152451	SPECIFIC RNA POLYMERASE II TRANSCRIPTION FACTOR ACTIVITY	8.23997e-15	INTERPHASE	2.83939e-12
CARBOHYDRATE TRANSMEMBRANE TRANSPORTER ACTIVITY	0.0938663	GLYCOPROTEIN METABOLIC PROCESS	0.0152811	PROTEASE INHIBITOR ACTIVITY	8.26211e-15	NUCLEAR PORE	2.84798e-12
CATION BINDING	0.0938663	PHOSPHOINOSITIDE MEDIATED SIGNALING	0.0152811	FATTY ACID METABOLIC PROCESS	8.47238e-15	MEMBRANE ORGANIZATION AND BIOGENESIS	3.07993e-12
STEROID DEHYDROGENASE ACTIVITY ACTING ON THE CH OH GROUP OF DONORSNAD OR NADP AS ACCEPTOR	0.094576	SECRETORY PATHWAY	0.0153368	CHROMATIN BINDING	8.50083e-15	RIBONUCLEASE ACTIVITY	3.12766e-12
SUGAR TRANSMEMBRANE TRANSPORTER ACTIVITY	0.0950388	AGING	0.015351	DEPHOSPHORYLATION	8.5572e-15	LYSOSOME ORGANIZATION AND BIOGENESIS	3.1303e-12
OVULATION CYCLE	0.0953937	MONOVALENT INORGANIC CATION TRANSPORT	0.0154556	ALCOHOL METABOLIC PROCESS	8.69085e-15	REGULATION OF DNA METABOLIC PROCESS	3.1303e-12
PROTEIN MODIFICATION PROCESS	0.095417	MYOBLAST DIFFERENTIATION	0.0155482	NUCLEAR IMPORT	8.74596e-15	OXIDOREDUCTASE ACTIVITY ACTING ON THE CH NH GROUP OF DONORS	3.16843e-12
ARYLSULFATASE ACTIVITY	0.0965949	ION TRANSMEMBRANE TRANSPORTER ACTIVITY	0.015562	PROTEIN IMPORT INTO NUCLEUS	8.74596e-15	PROTEIN KINASE BINDING	3.20463e-12
POSITIVE REGULATION OF TRANSFERASE ACTIVITY	0.0986381	SECRETORY GRANULE	0.015562	INTERPHASE	1.05287e-14	CHROMATIN ASSEMBLY	3.32061e-12
ANGIOGENESIS	0.0989219	FATTY ACID BIOSYNTHETIC PROCESS	0.0157128	REGULATION OF MITOTIC CELL CYCLE	1.12051e-14	T CELL ACTIVATION	3.32899e-12
BIOPOLYMER MODIFICATION	0.0990503	OXIDOREDUCTASE ACTIVITY ACTING ON SULFUR GROUP OF DONORS	0.0162021	POTASSIUM CHANNEL ACTIVITY	1.12131e-14	WOUND HEALING	3.35044e-12
DNA METABOLIC PROCESS	0.0990503	REGULATION OF ACTION POTENTIAL	0.0162021	POSITIVE REGULATION OF CELLULAR PROTEIN METABOLIC PROCESS	1.17893e-14	ENDOSOME	3.40627e-12
NUCLEOTIDE METABOLIC PROCESS	0.0990503	PROTEIN FOLDING	0.01622	GUANYL NUCLEOTIDE EXCHANGE FACTOR ACTIVITY	1.19221e-14	PROTEOGLYCAN METABOLIC PROCESS	3.41212e-12
ATPASE ACTIVITY COUPLED TO TRANSMEMBRANE MOVEMENT OF IONS	0.0991102	POSITIVE REGULATION OF MULTICELLULAR ORGANISMAL PROCESS	0.0162838	TRANSLATION INITIATION FACTOR ACTIVITY	1.25331e-14	CHEMICAL HOMEOSTASIS	3.48775e-12
NEURON APOPTOSIS	0.0993771	CHEMICAL HOMEOSTASIS	0.0164447	VASCULATURE DEVELOPMENT	1.2793e-14	CHROMATIN REMODELING	3.60633e-12
ATPASE ACTIVITY COUPLED	0.104969	LYASE ACTIVITY	0.0165908	GENERAL RNA POLYMERASE II TRANSCRIPTION FACTOR ACTIVITY	1.3067e-14	REGULATION OF ACTION POTENTIAL	3.60633e-12
GENERAL RNA POLYMERASE II TRANSCRIPTION FACTOR ACTIVITY	0.104969	CORTICAL CYTOSKELETON	0.0166366	ONE CARBON COMPOUND METABOLIC PROCESS	1.41352e-14	EXTRINSIC TO PLASMA MEMBRANE	3.79144e-12
CELL SUBSTRATE ADHERENS JUNCTION	0.105553	GTPASE ACTIVITY	0.0166366	POSITIVE REGULATION OF T CELL ACTIVATION	1.44927e-14	HEMOPOIESIS	4.00643e-12
REGULATION OF BINDING	0.106047	NUCLEOTIDYLTRANSFERASE ACTIVITY	0.016869	NUCLEOBASENUCLEOSIDE AND NUCLEOTIDE METABOLIC PROCESS	1.69508e-14	SERINE HYDROLASE ACTIVITY	4.04354e-12
LIPID RAFT	0.106195	DNA DIRECTED DNA POLYMERASE ACTIVITY	0.0169325	NITROGEN COMPOUND CATABOLIC PROCESS	1.74083e-14	SERINE TYPE PEPTIDASE ACTIVITY	4.04354e-12
GLUTAMINE FAMILY AMINO ACID METABOLIC PROCESS	0.108418	TRANSLATIONAL INITIATION	0.0169565	COVALENT CHROMATIN MODIFICATION	1.77189e-14	CELL ACTIVATION	4.13006e-12
DNA DAMAGE RESPONSESIGNAL TRANSDUCTION RESULTING IN INDUCTION OF APOPTOSIS	0.108802	RESPONSE TO WOUNDING	0.0174427	HISTONE MODIFICATION	1.77189e-14	REGULATION OF HORMONE SECRETION	4.20655e-12
PROTEIN COMPLEX	0.109743	NEGATIVE REGULATION OF IMMUNE SYSTEM PROCESS	0.017757	ORGANELLE MEMBRANE	1.80923e-14	ANTIPORTER ACTIVITY	4.22705e-12
SIGNAL TRANSDUCTION	0.109743	SIALYLTRANSFERASE ACTIVITY	0.0178733	MOTOR ACTIVITY	1.91657e-14	FATTY ACID METABOLIC PROCESS	4.61726e-12
ER GOLGI INTERMEDIATE COMPARTMENT	0.110992	VIRAL INFECTIOUS CYCLE	0.0184452	POSITIVE REGULATION OF TRANSFERASE ACTIVITY	1.92044e-14	NUCLEOTIDE EXCISION REPAIR	4.82902e-12
BIOPOLYMER METABOLIC PROCESS	0.111419	INFLAMMATORY RESPONSE	0.0185699	GROWTH FACTOR ACTIVITY	2.35983e-14	ESTABLISHMENT AND OR MAINTENANCE OF CHROMATIN ARCHITECTURE	5.09972e-12
ALCOHOL METABOLIC PROCESS	0.112248	CELLULAR CATABOLIC PROCESS	0.0188265	PROTEIN KINASE BINDING	2.57843e-14	CELLULAR PROTEIN METABOLIC PROCESS	5.17431e-12
ANION CATION SYMPORTER ACTIVITY	0.112248	CORNIFIED ENVELOPE	0.0188265	HYDROLASE ACTIVITY HYDROLYZING O GLYCOSYL COMPOUNDS	2.65773e-14	PHAGOCYTOSIS	5.19879e-12
INFLAMMATORY RESPONSE	0.112285	CARBOHYDRATE METABOLIC PROCESS	0.0190814	CHROMATIN MODIFICATION	2.75543e-14	HETEROPHILIC CELL ADHESION	5.27206e-12
NUCLEAR BODY	0.112285	FOCAL ADHESION	0.01911	NEUTRAL AMINO ACID TRANSPORT	2.89145e-14	RESPONSE TO CHEMICAL STIMULUS	5.55447e-12
CELLULAR RESPONSE TO STRESS	0.112872	CATION TRANSMEMBRANE TRANSPORTER ACTIVITY	0.0192007	METALLOPEPTIDASE ACTIVITY	3.17869e-14	CHROMATIN ASSEMBLY OR DISASSEMBLY	5.55637e-12
SERINE TYPE ENDOPEPTIDASE INHIBITOR ACTIVITY	0.113864	TRANSCRIPTION FACTOR ACTIVITY	0.0192007	MEIOTIC RECOMBINATION	3.18375e-14	CORNIFIED ENVELOPE	5.6182e-12
MEMBRANE LIPID BIOSYNTHETIC PROCESS	0.114217	REGULATION OF BIOLOGICAL QUALITY	0.0197548	AMINO ACID TRANSMEMBRANE TRANSPORTER ACTIVITY	3.2521e-14	PROTEIN METABOLIC PROCESS	5.75973e-12
SMALL NUCLEAR RIBONUCLEOPROTEIN COMPLEX	0.114262	REGULATION OF PROTEIN SECRETION	0.0197548	MAPKKK CASCADE GO 0000165	3.28374e-14	ENDOMEMBRANE SYSTEM	5.78435e-12
MAINTENANCE OF PROTEIN LOCALIZATION	0.114379	CATABOLIC PROCESS	0.0198292	POSITIVE REGULATION OF CELLULAR COMPONENT ORGANIZATION AND BIOGENESIS	3.34578e-14	IMMUNE SYSTEM DEVELOPMENT	6.74104e-12
MITOCHONDRIAL MEMBRANE ORGANIZATION AND BIOGENESIS	0.11492	STEROID DEHYDROGENASE ACTIVITY ACTING ON THE CH OH GROUP OF DONORSNAD OR NADP AS ACCEPTOR	0.019833	EUKARYOTIC TRANSLATION INITIATION FACTOR 3 COMPLEX	3.48173e-14	BASAL LAMINA	7.11163e-12
REGULATION OF CYTOKINE BIOSYNTHETIC PROCESS	0.115581	POSITIVE REGULATION OF DEVELOPMENTAL PROCESS	0.0199798	REGULATION OF IMMUNE SYSTEM PROCESS	3.48173e-14	PATTERN SPECIFICATION PROCESS	7.15311e-12
ESTABLISHMENT OF CELLULAR LOCALIZATION	0.118186	INORGANIC ANION TRANSMEMBRANE TRANSPORTER ACTIVITY	0.0199896	AMINE CATABOLIC PROCESS	3.5608e-14	CELLULAR MACROMOLECULE METABOLIC PROCESS	7.28605e-12
SERINE TYPE ENDOPEPTIDASE ACTIVITY	0.118407	SKELETAL MUSCLE DEVELOPMENT	0.0199896	ORGANELLE INNER MEMBRANE	3.57766e-14	EXOPEPTIDASE ACTIVITY	7.61137e-12
ENZYME REGULATOR ACTIVITY	0.11996	HYDROLASE ACTIVITY ACTING ON ESTER BONDS	0.0204187	CHEMICAL HOMEOSTASIS	3.98819e-14	CELLULAR LIPID METABOLIC PROCESS	7.64944e-12
PATTERN RECOGNITION RECEPTOR ACTIVITY	0.11996	LYSOSOME ORGANIZATION AND BIOGENESIS	0.0206696	MACROMOLECULE BIOSYNTHETIC PROCESS	4.02673e-14	CYTOSKELETON DEPENDENT INTRACELLULAR TRANSPORT	8.06839e-12
SINGLE STRANDED RNA BINDING	0.120235	POSITIVE REGULATION OF HYDROLASE ACTIVITY	0.0217519	ESTABLISHMENT OF PROTEIN LOCALIZATION	4.22847e-14	LIPID TRANSPORT	8.10687e-12
PROTEIN CATABOLIC PROCESS	0.120476	PROTEIN TYROSINE PHOSPHATASE ACTIVITY	0.0218421	NUCLEOTIDE BIOSYNTHETIC PROCESS	4.29775e-14	MRNA PROCESSING GO 0006397	8.26955e-12
MORPHOGENESIS OF AN EPITHELIUM	0.121095	DNA RECOMBINATION	0.021982	ENDODEOXYRIBONUCLEASE ACTIVITY	4.50146e-14	REGULATION OF IMMUNE RESPONSE	8.30728e-12
INTRACELLULAR ORGANELLE PART	0.121456	CATION BINDING	0.0222474	REGULATION OF CELL ADHESION	4.56065e-14	POSITIVE REGULATION OF IMMUNE SYSTEM PROCESS	8.3809e-12
MAP KINASE ACTIVITY	0.121456	SECRETION BY CELL	0.0229059	POSITIVE REGULATION OF PHOSPHORYLATION	4.79716e-14	REGULATION OF RESPONSE TO STIMULUS	8.38094e-12
ORGANELLE PART	0.121456	NUCLEOLUS	0.0231096	ADAPTIVE IMMUNE RESPONSE	5.56664e-14	MEMBRANE BOUND VESICLE	8.54187e-12
ACTIN CYTOSKELETON ORGANIZATION AND BIOGENESIS	0.121651	SUGAR BINDING	0.023159	ADAPTIVE IMMUNE RESPONSE GO 0002460	5.56664e-14	PROTEASE INHIBITOR ACTIVITY	8.55845e-12
HYDROLASE ACTIVITY ACTING ON ESTER BONDS	0.121651	INTRINSIC TO GOLGI MEMBRANE	0.0234354	CHLORIDE CHANNEL ACTIVITY	5.9997e-14	HEMOPOIETIC OR LYMPHOID ORGAN DEVELOPMENT	8.96313e-12
RESPONSE TO TOXIN	0.123786	ENDOSOME	0.0239439	CARBOHYDRATE CATABOLIC PROCESS	6.24941e-14	SERINE TYPE ENDOPEPTIDASE ACTIVITY	9.45334e-12
TRANSFERASE ACTIVITY TRANSFERRING PENTOSYL GROUPS	0.124669	NEUTRAL AMINO ACID TRANSPORT	0.0239439	CELLULAR CARBOHYDRATE CATABOLIC PROCESS	6.24941e-14	PEPTIDYL AMINO ACID MODIFICATION	9.63671e-12
REGULATION OF METABOLIC PROCESS	0.124938	DNA POLYMERASE ACTIVITY	0.0241644	SYNAPTIC VESICLE	6.308e-14	ATP DEPENDENT HELICASE ACTIVITY	9.78926e-12
CENTRAL NERVOUS SYSTEM DEVELOPMENT	0.125127	ENDOPEPTIDASE ACTIVITY	0.0246084	TELOMERIC DNA BINDING	6.308e-14	HYDROLASE ACTIVITY ACTING ON ESTER BONDS	9.83614e-12
PROTEIN FOLDING	0.125127	SPECIFIC RNA POLYMERASE II TRANSCRIPTION FACTOR ACTIVITY	0.0246563	ACTIN BINDING	6.69253e-14	ESTABLISHMENT OF PROTEIN LOCALIZATION	1.05176e-11
INSOLUBLE FRACTION	0.126945	NEGATIVE REGULATION OF APOPTOSIS	0.0247926	DEVELOPMENT OF PRIMARY SEXUAL CHARACTERISTICS	7.27462e-14	COFACTOR TRANSPORT	1.0637e-11
HYDROGEN ION TRANSMEMBRANE TRANSPORTER ACTIVITY	0.127896	CYTOSOL	0.025011	CELLULAR BIOSYNTHETIC PROCESS	7.83336e-14	DNA FRAGMENTATION DURING APOPTOSIS	1.08755e-11
NEGATIVE REGULATION OF MULTICELLULAR ORGANISMAL PROCESS	0.127896	CARBOHYDRATE BINDING	0.0253468	TRANSFERASE ACTIVITY TRANSFERRING GLYCOSYL GROUPS	7.97907e-14	PROGRAMMED CELL DEATH	1.09042e-11
PROTEIN AMINO ACID AUTOPHOSPHORYLATION	0.128585	PROTEIN METABOLIC PROCESS	0.0254522	TRANSCRIPTION ELONGATION REGULATOR ACTIVITY	8.31708e-14	CHROMATIN MODIFICATION	1.12414e-11
PROTEIN AUTOPROCESSING	0.128585	ER NUCLEAR SIGNALING PATHWAY	0.0258433	OXIDOREDUCTASE ACTIVITY GO 0016706	8.65226e-14	CALCIUM ION BINDING	1.13691e-11
L AMINO ACID TRANSMEMBRANE TRANSPORTER ACTIVITY	0.128718	KINASE INHIBITOR ACTIVITY	0.0258433	CYSTEINE TYPE ENDOPEPTIDASE ACTIVITY	1.00518e-13	ENZYME INHIBITOR ACTIVITY	1.14268e-11
DNA REPLICATION INITIATION	0.130499	PROTEIN KINASE INHIBITOR ACTIVITY	0.0258433	POSITIVE REGULATION OF PROTEIN METABOLIC PROCESS	1.19285e-13	REGULATION OF PROTEIN MODIFICATION PROCESS	1.16822e-11
REGULATION OF PROTEIN STABILITY	0.132588	TUBE MORPHOGENESIS	0.0260676	ENDOMEMBRANE SYSTEM	1.2507e-13	POSITIVE REGULATION OF MULTICELLULAR ORGANISMAL PROCESS	1.17585e-11
REGULATION OF RAS PROTEIN SIGNAL TRANSDUCTION	0.132588	PROTEASE INHIBITOR ACTIVITY	0.0261631	POSITIVE REGULATION OF BINDING	1.25691e-13	NITROGEN COMPOUND CATABOLIC PROCESS	1.17852e-11
REGULATION OF RHO PROTEIN SIGNAL TRANSDUCTION	0.132588	ZINC ION BINDING	0.0262753	PROTEIN TARGETING	1.40719e-13	AMINE CATABOLIC PROCESS	1.17964e-11
MACROMOLECULE LOCALIZATION	0.133317	ENDOPLASMIC RETICULUM PART	0.0263479	MRNA PROCESSING GO 0006397	1.41403e-13	REGULATION OF MAP KINASE ACTIVITY	1.19566e-11
NUCLEOBASENUCLEOSIDENUCLEOTIDE AND NUCLEIC ACID METABOLIC PROCESS	0.133717	LEARNING AND OR MEMORY	0.0263479	INFLAMMATORY RESPONSE	1.41686e-13	RESPIRATORY GASEOUS EXCHANGE	1.22707e-11
NEGATIVE REGULATION OF TRANSLATION	0.134693	MITOCHONDRIAL RESPIRATORY CHAIN COMPLEX I	0.0269381	REPLICATION FORK	1.46729e-13	CELLULAR MORPHOGENESIS DURING DIFFERENTIATION	1.26873e-11
RNA POLYMERASE II TRANSCRIPTION FACTOR ACTIVITYENHANCER BINDING	0.136393	NADH DEHYDROGENASE COMPLEX	0.0269381	PROTEIN KINASE CASCADE	1.47838e-13	REGULATION OF PROTEIN AMINO ACID PHOSPHORYLATION	1.27298e-11
CASPASE REGULATOR ACTIVITY	0.137157	RESPIRATORY CHAIN COMPLEX I	0.0269381	RESPONSE TO WOUNDING	1.50082e-13	NEGATIVE REGULATION OF CATALYTIC ACTIVITY	1.50318e-11
POSITIVE REGULATION OF CELL ADHESION	0.137157	REGULATION OF T CELL PROLIFERATION	0.0277257	NUCLEAR ORGANIZATION AND BIOGENESIS	1.50784e-13	BLOOD COAGULATION	1.54173e-11
TRANSCRIPTION ELONGATION REGULATOR ACTIVITY	0.137257	CELLULAR PROTEIN METABOLIC PROCESS	0.0279197	REGULATION OF HOMEOSTATIC PROCESS	1.51515e-13	COAGULATION	1.54173e-11
GTPASE ACTIVITY	0.141451	T CELL PROLIFERATION	0.0280047	REGULATION OF ENDOCYTOSIS	1.59791e-13	PROTEIN TYROSINE PHOSPHATASE ACTIVITY	1.55838e-11
MAP KINASE KINASE KINASE ACTIVITY	0.14416	VESICLE MEDIATED TRANSPORT	0.0284012	VIRAL REPRODUCTION	1.63456e-13	PROTEOLYSIS	1.58749e-11
KINASE INHIBITOR ACTIVITY	0.144888	SH2 DOMAIN BINDING	0.0285734	REGULATION OF MAP KINASE ACTIVITY	1.74813e-13	RESPONSE TO EXTRACELLULAR STIMULUS	1.63771e-11
PROTEIN KINASE INHIBITOR ACTIVITY	0.144888	NEGATIVE REGULATION OF TRANSFERASE ACTIVITY	0.0287285	UDP GLYCOSYLTRANSFERASE ACTIVITY	1.81207e-13	LEUKOCYTE ACTIVATION	1.65391e-11
DRUG BINDING	0.146261	PROTEIN TARGETING	0.0287285	MITOCHONDRIAL INNER MEMBRANE	1.8725e-13	REGULATION OF T CELL PROLIFERATION	1.68432e-11
ACTIN BINDING	0.148213	VOLTAGE GATED POTASSIUM CHANNEL ACTIVITY	0.0296276	POSITIVE REGULATION OF IMMUNE SYSTEM PROCESS	1.94098e-13	CLATHRIN COATED VESICLE	1.68787e-11
MICROTUBULE ASSOCIATED COMPLEX	0.148213	REGULATION OF HYDROLASE ACTIVITY	0.0297748	DEFENSE RESPONSE	2.02866e-13	PROTEIN AMINO ACID ADP RIBOSYLATION	1.68907e-11
CYTOPLASMIC PART	0.149158	MUSCLE DEVELOPMENT	0.0298704	RESPONSE TO VIRUS	2.30514e-13	DEFENSE RESPONSE	1.72223e-11
ENDOPEPTIDASE ACTIVITY	0.149158	N ACETYLGLUCOSAMINE METABOLIC PROCESS	0.0298704	CYTOKINE BIOSYNTHETIC PROCESS	2.3544e-13	PROTEIN TRANSPORT	1.72223e-11
TRANSCRIPTION FACTOR ACTIVITY	0.150221	REGULATION OF APOPTOSIS	0.030115	CYTOKINE METABOLIC PROCESS	2.3544e-13	ENDOPEPTIDASE ACTIVITY	1.73823e-11
MONOSACCHARIDE BINDING	0.151431	REGULATION OF DEVELOPMENTAL PROCESS	0.030373	CARBOHYDRATE TRANSPORT	2.47259e-13	PROTEIN RNA COMPLEX ASSEMBLY	1.78383e-11
PROTEIN TETRAMERIZATION	0.152146	FATTY ACID OXIDATION	0.0304295	STRUCTURAL CONSTITUENT OF CYTOSKELETON	2.47659e-13	INTERPHASE OF MITOTIC CELL CYCLE	1.8487e-11
NUCLEOBASENUCLEOSIDENUCLEOTIDE AND NUCLEIC ACID TRANSPORT	0.154518	GOLGI ASSOCIATED VESICLE	0.0304295	G PROTEIN SIGNALING ADENYLATE CYCLASE INHIBITING PATHWAY	2.52463e-13	VESICLE	1.88427e-11
REGULATION OF G PROTEIN COUPLED RECEPTOR PROTEIN SIGNALING PATHWAY	0.156671	HISTONE ACETYLTRANSFERASE ACTIVITY	0.0304295	ANATOMICAL STRUCTURE FORMATION	2.64984e-13	MICROSOME	1.88972e-11
REGULATION OF MEMBRANE POTENTIAL	0.156687	MEDIATOR COMPLEX	0.0304295	PROTEIN AMINO ACID AUTOPHOSPHORYLATION	2.64984e-13	VESICULAR FRACTION	1.88972e-11
HOMEOSTATIC PROCESS	0.15672	NEGATIVE REGULATION OF DEVELOPMENTAL PROCESS	0.0304295	PROTEIN AUTOPROCESSING	2.64984e-13	CYTOPLASMIC MEMBRANE BOUND VESICLE	1.93038e-11
DNA DIRECTED RNA POLYMERASEII CORE COMPLEX	0.157012	PROTEIN UBIQUITINATION	0.0306043	PEPTIDYL TYROSINE MODIFICATION	2.72541e-13	NEUTRAL AMINO ACID TRANSMEMBRANE TRANSPORTER ACTIVITY	1.93779e-11
SPLICEOSOME	0.157012	RNA SPLICING FACTOR ACTIVITYTRANSESTERIFICATION MECHANISM	0.0306043	VIRAL REPRODUCTIVE PROCESS	2.7484e-13	AMINO ACID METABOLIC PROCESS	2.15458e-11
SUPEROXIDE METABOLIC PROCESS	0.157012	PDZ DOMAIN BINDING	0.0310145	POSITIVE REGULATION OF PROTEIN MODIFICATION PROCESS	3.53965e-13	REGULATION OF CYTOKINE PRODUCTION	2.2523e-11
HORMONE SECRETION	0.158318	CELLULAR MACROMOLECULE METABOLIC PROCESS	0.0311356	AMINO ACID CATABOLIC PROCESS	3.55645e-13	APICAL PART OF CELL	2.26708e-11
POSITIVE REGULATION OF CELLULAR PROCESS	0.158318	ESTABLISHMENT OF PROTEIN LOCALIZATION	0.0311356	RNA SPLICINGVIA TRANSESTERIFICATION REACTIONS	3.72312e-13	PHOSPHOLIPID BINDING	2.32316e-11
GLYCOPROTEIN CATABOLIC PROCESS	0.159407	L AMINO ACID TRANSMEMBRANE TRANSPORTER ACTIVITY	0.0311356	VIRAL INFECTIOUS CYCLE	3.76947e-13	STRESS ACTIVATED PROTEIN KINASE SIGNALING PATHWAY	2.32316e-11
REGULATION OF PROGRAMMED CELL DEATH	0.159883	REGULATION OF PROTEIN MODIFICATION PROCESS	0.0313453	CYTOPLASMIC MEMBRANE BOUND VESICLE	4.03499e-13	SODIUM CHANNEL ACTIVITY	2.35551e-11
VOLTAGE GATED POTASSIUM CHANNEL ACTIVITY	0.162224	RAS GUANYL NUCLEOTIDE EXCHANGE FACTOR ACTIVITY	0.0313529	PATTERN SPECIFICATION PROCESS	4.32452e-13	RNA DEPENDENT ATPASE ACTIVITY	2.41456e-11
NUCLEAR LUMEN	0.162805	REGULATION OF DNA METABOLIC PROCESS	0.0315344	ANGIOGENESIS	4.34664e-13	NUCLEOBASENUCLEOSIDENUCLEOTIDE AND NUCLEIC ACID TRANSPORT	2.57365e-11
ACTIN FILAMENT BASED PROCESS	0.163256	MEMBRANE ORGANIZATION AND BIOGENESIS	0.0321623	EMBRYONIC MORPHOGENESIS	4.39205e-13	MICROTUBULE ASSOCIATED COMPLEX	2.58637e-11
RIBONUCLEASE ACTIVITY	0.163346	REGULATION OF PHOSPHORYLATION	0.0321623	APOPTOTIC NUCLEAR CHANGES	4.398e-13	FATTY ACID OXIDATION	2.63389e-11
EARLY ENDOSOME	0.163373	RHYTHMIC PROCESS	0.0324864	AMINO SUGAR METABOLIC PROCESS	4.45541e-13	POSITIVE REGULATION OF CELLULAR PROCESS	2.63389e-11
CELLULAR RESPONSE TO EXTRACELLULAR STIMULUS	0.163574	POSITIVE REGULATION OF PROTEIN AMINO ACID PHOSPHORYLATION	0.0326352	GLUCOSAMINE METABOLIC PROCESS	4.45541e-13	KINASE INHIBITOR ACTIVITY	2.69618e-11
CELLULAR RESPONSE TO NUTRIENT LEVELS	0.163574	G PROTEIN SIGNALING ADENYLATE CYCLASE ACTIVATING PATHWAY	0.0327513	GLUTATHIONE TRANSFERASE ACTIVITY	4.48412e-13	PROTEIN KINASE INHIBITOR ACTIVITY	2.69618e-11
NEGATIVE REGULATION OF CELL CYCLE	0.163574	OXIDOREDUCTASE ACTIVITY ACTING ON PEROXIDE AS ACCEPTOR	0.0330205	T CELL ACTIVATION	4.60823e-13	CONDENSED NUCLEAR CHROMOSOME	2.73927e-11
INTRACELLULAR TRANSPORT	0.164021	HYDROLASE ACTIVITY ACTING ON CARBON NITROGEN NOT PEPTIDEBONDSIN CYCLIC AMIDINES	0.033593	POSITIVE REGULATION OF TRANSCRIPTION FROM RNA POLYMERASE II PROMOTER	5.04018e-13	INTRACELLULAR PROTEIN TRANSPORT	2.7544e-11
HEMOPOIESIS	0.164238	LIGAND DEPENDENT NUCLEAR RECEPTOR ACTIVITY	0.0337207	INTERPHASE OF MITOTIC CELL CYCLE	5.06928e-13	JNK CASCADE	2.90914e-11
RAS GTPASE BINDING	0.164238	BRAIN DEVELOPMENT	0.0337549	RECEPTOR SIGNALING PROTEIN SERINE THREONINE KINASE ACTIVITY	5.08276e-13	LIPID METABOLIC PROCESS	2.93889e-11
AMINOPEPTIDASE ACTIVITY	0.164638	ATPASE ACTIVITY COUPLED TO TRANSMEMBRANE MOVEMENT OF IONS PHOSPHORYLATIVE MECHANISM	0.033932	ANION CHANNEL ACTIVITY	5.19393e-13	POSITIVE REGULATION OF T CELL PROLIFERATION	2.97441e-11
PEPTIDE BINDING	0.166539	NUCLEOBASENUCLEOSIDENUCLEOTIDE AND NUCLEIC ACID TRANSPORT	0.0339597	DNA FRAGMENTATION DURING APOPTOSIS	5.26657e-13	PEPTIDASE ACTIVITY	3.01399e-11
COVALENT CHROMATIN MODIFICATION	0.166864	ELECTRON TRANSPORT GO 0006118	0.0339639	PHOSPHOLIPID BINDING	5.26657e-13	RNA EXPORT FROM NUCLEUS	3.07049e-11
VESICLE LOCALIZATION	0.166917	HEART DEVELOPMENT	0.0340001	VACUOLAR PART	5.26657e-13	HOMEOSTATIC PROCESS	3.17877e-11
CALCIUM MEDIATED SIGNALING	0.167108	CELL PROJECTION	0.0342149	COATED VESICLE	6.44213e-13	NUCLEAR TRANSPORT	3.22137e-11
ACTIN FILAMENT	0.168064	NEGATIVE REGULATION OF CELL CYCLE	0.0353323	BASOLATERAL PLASMA MEMBRANE	7.10633e-13	NUCLEOCYTOPLASMIC TRANSPORT	3.22137e-11
CELLULAR PROTEIN COMPLEX DISASSEMBLY	0.168064	ACTIN FILAMENT BINDING	0.0359247	REGULATION OF DNA BINDING	7.38522e-13	REGULATION OF CATALYTIC ACTIVITY	3.29266e-11
HETEROGENEOUS NUCLEAR RIBONUCLEOPROTEIN COMPLEX	0.168064	CYSTEINE TYPE PEPTIDASE ACTIVITY	0.0359247	POSITIVE REGULATION OF CELL ADHESION	8.08455e-13	MACROMOLECULE BIOSYNTHETIC PROCESS	3.53506e-11
MACROMOLECULAR COMPLEX DISASSEMBLY	0.168064	SPINDLE MICROTUBULE	0.0359247	UNFOLDED PROTEIN BINDING	8.66125e-13	VACUOLE ORGANIZATION AND BIOGENESIS	3.55212e-11
PROTEIN COMPLEX DISASSEMBLY	0.168064	ENZYME INHIBITOR ACTIVITY	0.0360237	MONOVALENT INORGANIC CATION TRANSPORT	9.12557e-13	REGULATION OF CELLULAR PROTEIN METABOLIC PROCESS	3.66467e-11
PYRIMIDINE NUCLEOTIDE METABOLIC PROCESS	0.168064	CELLULAR MACROMOLECULE CATABOLIC PROCESS	0.0363237	RNA BINDING	9.13646e-13	REGULATION OF PROTEIN METABOLIC PROCESS	3.74206e-11
METALLOEXOPEPTIDASE ACTIVITY	0.170311	POSITIVE REGULATION OF CYTOKINE BIOSYNTHETIC PROCESS	0.0370217	EXTRINSIC TO PLASMA MEMBRANE	9.35473e-13	MICROBODY PART	3.75368e-11
MEMBRANE ORGANIZATION AND BIOGENESIS	0.170409	PROTEIN MODIFICATION BY SMALL PROTEIN CONJUGATION	0.037225	L AMINO ACID TRANSMEMBRANE TRANSPORTER ACTIVITY	9.54824e-13	PEROXISOMAL PART	3.75368e-11
VACUOLE ORGANIZATION AND BIOGENESIS	0.170545	RNA CATABOLIC PROCESS	0.0378843	PHOSPHOINOSITIDE BINDING	1.00284e-12	LYMPHOCYTE ACTIVATION	3.8072e-11
PROTEIN SECRETION	0.172159	REGULATION OF RESPONSE TO STIMULUS	0.0382257	SENSORY PERCEPTION OF CHEMICAL STIMULUS	1.05842e-12	NEURON DEVELOPMENT	3.84678e-11
RESPONSE TO HEAT	0.172159	EPIDERMAL GROWTH FACTOR RECEPTOR SIGNALING PATHWAY	0.0387173	NEURON DIFFERENTIATION	1.17915e-12	SPHINGOLIPID METABOLIC PROCESS	3.87042e-11
MITOCHONDRIAL RIBOSOME	0.17407	REGULATION OF PROTEIN AMINO ACID PHOSPHORYLATION	0.0390995	CELL MATRIX JUNCTION	1.2236e-12	GTP BINDING	3.87931e-11
ORGANELLAR RIBOSOME	0.17407	RNA DEPENDENT ATPASE ACTIVITY	0.0391814	CELL SUBSTRATE ADHERENS JUNCTION	1.2236e-12	GUANYL NUCLEOTIDE BINDING	3.87931e-11
COLLAGEN	0.174838	POSITIVE REGULATION OF T CELL PROLIFERATION	0.0395732	FOCAL ADHESION	1.2236e-12	MICROBODY	3.87931e-11
CELLULAR COMPONENT DISASSEMBLY	0.176187	AMINO SUGAR METABOLIC PROCESS	0.040082	NUCLEAR PORE	1.30197e-12	PEROXISOME	3.87931e-11
CENTROSOME CYCLE	0.177364	GLUCOSAMINE METABOLIC PROCESS	0.040082	SULFUR METABOLIC PROCESS	1.48466e-12	CYTOPLASMIC VESICLE	4.151e-11
REGULATION OF ACTION POTENTIAL	0.17799	VACUOLE ORGANIZATION AND BIOGENESIS	0.0401191	NUCLEOLUS	1.51321e-12	HYDROLASE ACTIVITY ACTING ON CARBON NITROGEN NOT PEPTIDEBONDSIN CYCLIC AMIDINES	4.21984e-11
NUCLEUS	0.178112	REGULATION OF CHROMOSOME ORGANIZATION AND BIOGENESIS	0.0402718	PROTEIN SECRETION	1.76897e-12	PROTEIN SECRETION	4.33201e-11
POSITIVE REGULATION OF T CELL ACTIVATION	0.179236	JAK STAT CASCADE	0.0409094	ENDOPLASMIC RETICULUM LUMEN	1.81034e-12	POSITIVE REGULATION OF CELLULAR METABOLIC PROCESS	4.39774e-11
NEURON PROJECTION	0.179296	PEPTIDE METABOLIC PROCESS	0.041003	NEURON DEVELOPMENT	1.82624e-12	AMINO SUGAR METABOLIC PROCESS	4.58074e-11
ENERGY RESERVE METABOLIC PROCESS	0.185921	THYROID HORMONE RECEPTOR BINDING	0.0416386	CYTOPLASMIC VESICLE	1.85775e-12	GLUCOSAMINE METABOLIC PROCESS	4.58074e-11
AMINE CATABOLIC PROCESS	0.186488	POSITIVE REGULATION OF CELLULAR PROCESS	0.0422165	DNA RECOMBINATION	1.85775e-12	LIPID BIOSYNTHETIC PROCESS	4.75238e-11
IMMUNE EFFECTOR PROCESS	0.186716	POSITIVE REGULATION OF IMMUNE SYSTEM PROCESS	0.042292	WOUND HEALING	2.26662e-12	ACTIVATION OF IMMUNE RESPONSE	4.76436e-11
AMINE BIOSYNTHETIC PROCESS	0.189374	ATP DEPENDENT HELICASE ACTIVITY	0.0424418	CELLULAR MONOVALENT INORGANIC CATION HOMEOSTASIS	2.37069e-12	BIOSYNTHETIC PROCESS	4.80166e-11
POLYSACCHARIDE BINDING	0.190098	PHAGOCYTOSIS	0.0424418	HEMOSTASIS	2.50753e-12	SECRETORY PATHWAY	4.8411e-11
CYTOPLASM	0.191018	RIBOSOMAL SUBUNIT	0.0426204	RNA SPLICING	2.53148e-12	SECRETORY GRANULE	4.858e-11
FATTY ACID METABOLIC PROCESS	0.193766	LIGASE ACTIVITY FORMING CARBON OXYGEN BONDS	0.0430462	HYDROLASE ACTIVITY ACTING ON GLYCOSYL BONDS	2.63016e-12	NEGATIVE REGULATION OF CELL ADHESION	5.28422e-11
NEGATIVE REGULATION OF PROGRAMMED CELL DEATH	0.194342	ANTIPORTER ACTIVITY	0.0431224	NEGATIVE REGULATION OF MULTICELLULAR ORGANISMAL PROCESS	3.33888e-12	RAS GTPASE ACTIVATOR ACTIVITY	5.39025e-11
SYNAPTIC VESICLE	0.194641	NEGATIVE REGULATION OF HYDROLASE ACTIVITY	0.043164	POSITIVE REGULATION OF PHOSPHATE METABOLIC PROCESS	3.58437e-12	RIBONUCLEOPROTEIN COMPLEX BIOGENESIS AND ASSEMBLY	5.45995e-11
PROTEIN POLYMERIZATION	0.195028	MACROMOLECULAR COMPLEX	0.0433914	NUCLEOTIDE METABOLIC PROCESS	3.72065e-12	REGULATION OF PROTEIN SECRETION	5.56799e-11
CYTOSKELETAL PROTEIN BINDING	0.195158	RESPONSE TO HYPOXIA	0.0434289	FATTY ACID BETA OXIDATION	3.85807e-12	PDZ DOMAIN BINDING	5.72522e-11
PROTEIN TARGETING TO MEMBRANE	0.196873	ER GOLGI INTERMEDIATE COMPARTMENT	0.0444132	PEPTIDE METABOLIC PROCESS	4.22745e-12	REGULATION OF PHOSPHORYLATION	5.76156e-11
TRANSCRIPTION INITIATION FROM RNA POLYMERASE II PROMOTER	0.197567	ENZYME LINKED RECEPTOR PROTEIN SIGNALING PATHWAY	0.044451	CONDENSED NUCLEAR CHROMOSOME	4.46504e-12	POSITIVE REGULATION OF BIOLOGICAL PROCESS	5.85436e-11
CHROMATIN REMODELING	0.198876	NEGATIVE REGULATION OF CATALYTIC ACTIVITY	0.0452024	STEROID BINDING	4.49965e-12	ATP DEPENDENT DNA HELICASE ACTIVITY	5.98827e-11
GENERATION OF PRECURSOR METABOLITES AND ENERGY	0.199621	ESTABLISHMENT OF ORGANELLE LOCALIZATION	0.0453908	MICROTUBULE BINDING	4.64923e-12	POSITIVE REGULATION OF METABOLIC PROCESS	6.27205e-11
EUKARYOTIC TRANSLATION INITIATION FACTOR 3 COMPLEX	0.199717	TELOMERIC DNA BINDING	0.0453908	REGULATION OF TRANSLATION	4.69262e-12	INSULIN RECEPTOR SIGNALING PATHWAY	6.30446e-11
INTERACTION WITH HOST	0.199717	DNA REPAIR	0.0461147	TUBE MORPHOGENESIS	5.20801e-12	MICROTUBULE	6.80766e-11
LIPOPROTEIN BINDING	0.199717	PROTEIN SECRETION	0.046259	TRANSLATIONAL INITIATION	5.30979e-12	ANION CATION SYMPORTER ACTIVITY	7.01411e-11
NEGATIVE REGULATION OF BIOSYNTHETIC PROCESS	0.199717	HEMOPOIESIS	0.0479284	NEUROTRANSMITTER SECRETION	5.41818e-12	RESPONSE TO LIGHT STIMULUS	7.37729e-11
NEGATIVE REGULATION OF CELLULAR BIOSYNTHETIC PROCESS	0.199717	BASE EXCISION REPAIR	0.0480952	REGULATED SECRETORY PATHWAY	5.41818e-12	MACROMOLECULAR COMPLEX	7.38852e-11
NUCLEAR PART	0.199717	CYTOKINE SECRETION	0.0484274	ANTIPORTER ACTIVITY	5.42753e-12	HYDROLASE ACTIVITY HYDROLYZING O GLYCOSYL COMPOUNDS	7.39011e-11
SMAD BINDING	0.199717	REGULATION OF CYTOKINE SECRETION	0.0484274	TRANSFERASE ACTIVITY TRANSFERRING PENTOSYL GROUPS	6.09751e-12	SMALL CONJUGATING PROTEIN SPECIFIC PROTEASE ACTIVITY	7.79794e-11
ACTIN FILAMENT BINDING	0.200422	MACROMOLECULE BIOSYNTHETIC PROCESS	0.0488216	NEURITE DEVELOPMENT	6.11326e-12	NEUROTRANSMITTER SECRETION	7.90448e-11
ELECTRON TRANSPORT GO 0006118	0.200521	G PROTEIN SIGNALING COUPLED TO IP3 SECOND MESSENGERPHOSPHOLIPASE C ACTIVATING	0.0496235	LIGASE ACTIVITY	6.63029e-12	AMINO ACID CATABOLIC PROCESS	8.05429e-11
POSITIVE REGULATION OF CYTOSKELETON ORGANIZATION AND BIOGENESIS	0.201028	PURINE NUCLEOTIDE METABOLIC PROCESS	0.0500718	REGULATION OF SIGNAL TRANSDUCTION	6.94832e-12	RIBONUCLEOPROTEIN COMPLEX	8.36832e-11
CENTROSOME ORGANIZATION AND BIOGENESIS	0.202018	HORMONE SECRETION	0.0500763	LIPOPROTEIN METABOLIC PROCESS	7.0584e-12	CELL PROJECTION PART	8.42522e-11
POSITIVE REGULATION OF T CELL PROLIFERATION	0.202018	INTRACELLULAR SIGNALING CASCADE	0.0501633	POTASSIUM CHANNEL REGULATOR ACTIVITY	7.32152e-12	POSITIVE REGULATION OF TRANSCRIPTIONDNA DEPENDENT	8.86427e-11
DNA BINDING	0.204327	PHOSPHOLIPID BINDING	0.0521274	TUBULIN BINDING	7.40413e-12	DETECTION OF CHEMICAL STIMULUS	9.22516e-11
POSITIVE REGULATION OF CYTOKINE PRODUCTION	0.204618	G PROTEIN SIGNALING ADENYLATE CYCLASE INHIBITING PATHWAY	0.0527193	POSITIVE REGULATION OF CATALYTIC ACTIVITY	7.50539e-12	CORTICAL CYTOSKELETON	9.28887e-11
TRIACYLGLYCEROL METABOLIC PROCESS	0.204618	MICROBODY PART	0.0532348	MEMBRANE BOUND VESICLE	7.61832e-12	INTERCELLULAR JUNCTION ASSEMBLY	9.84464e-11
G PROTEIN SIGNALING ADENYLATE CYCLASE ACTIVATING PATHWAY	0.204893	PEROXISOMAL PART	0.0532348	INTERMEDIATE FILAMENT	8.17568e-12	POSITIVE REGULATION OF PROTEIN AMINO ACID PHOSPHORYLATION	1.00567e-10
HEMOPOIETIC OR LYMPHOID ORGAN DEVELOPMENT	0.20729	ENDOMEMBRANE SYSTEM	0.0540929	INTERMEDIATE FILAMENT CYTOSKELETON	8.17568e-12	DEAMINASE ACTIVITY	1.04056e-10
MEMBRANE ENCLOSED LUMEN	0.207388	MACROMOLECULAR COMPLEX ASSEMBLY	0.0555029	APOPTOTIC PROGRAM	8.2764e-12	COFACTOR TRANSPORTER ACTIVITY	1.11627e-10
ORGANELLE LUMEN	0.207388	NUCLEAR TRANSPORT	0.057635	CELL PROJECTION	8.62619e-12	SPECIFIC TRANSCRIPTIONAL REPRESSOR ACTIVITY	1.12097e-10
REGULATION OF CELL ADHESION	0.207388	NUCLEOCYTOPLASMIC TRANSPORT	0.057635	REGULATION OF I KAPPAB KINASE NF KAPPAB CASCADE	8.62619e-12	CARBOXY LYASE ACTIVITY	1.12523e-10
PROTEIN COMPLEX BINDING	0.209483	DNA CATABOLIC PROCESS	0.0576582	STRUCTURAL CONSTITUENT OF RIBOSOME	8.62619e-12	TRANSFERASE ACTIVITY TRANSFERRING ALKYL OR ARYLOTHER THAN METHYLGROUPS	1.18423e-10
COFACTOR BIOSYNTHETIC PROCESS	0.209826	MEIOSIS I	0.0579615	CELL ACTIVATION	8.68588e-12	SYMPORTER ACTIVITY	1.21162e-10
TRANSMEMBRANE RECEPTOR PROTEIN PHOSPHATASE ACTIVITY	0.209826	PHOSPHOINOSITIDE BINDING	0.0582724	INTRACELLULAR PROTEIN TRANSPORT	8.83034e-12	REGULATION OF CELL ADHESION	1.21505e-10
HYDROLASE ACTIVITY ACTING ON CARBON NITROGEN NOT PEPTIDEBONDSIN LINEAR AMIDES	0.212061	RECEPTOR MEDIATED ENDOCYTOSIS	0.0582779	LYASE ACTIVITY	8.91572e-12	ORGANELLE MEMBRANE	1.28471e-10
ATP DEPENDENT HELICASE ACTIVITY	0.214246	CELL CYCLE ARREST GO 0007050	0.0593216	REGULATION OF ANATOMICAL STRUCTURE MORPHOGENESIS	8.94442e-12	GTPASE BINDING	1.42546e-10
POSITIVE REGULATION OF BIOLOGICAL PROCESS	0.214246	ADHERENS JUNCTION	0.0601285	CELLULAR MORPHOGENESIS DURING DIFFERENTIATION	9.68322e-12	PROTEIN COMPLEX ASSEMBLY	1.47418e-10
DNA HELICASE ACTIVITY	0.214256	ANTIGEN BINDING	0.0607127	ATP DEPENDENT DNA HELICASE ACTIVITY	1.05448e-11	INTRACELLULAR SIGNALING CASCADE	1.49679e-10
STRUCTURAL CONSTITUENT OF RIBOSOME	0.215042	VOLTAGE GATED SODIUM CHANNEL ACTIVITY	0.061134	DEOXYRIBONUCLEASE ACTIVITY	1.16215e-11	CELLULAR CATABOLIC PROCESS	1.56906e-10
POSITIVE REGULATION OF TRANSPORT	0.215068	CYTOPLASM ORGANIZATION AND BIOGENESIS	0.0641302	NEGATIVE REGULATION OF CELL MIGRATION	1.1644e-11	SH2 DOMAIN BINDING	1.60302e-10
HYDROLASE ACTIVITY ACTING ON CARBON NITROGEN NOT PEPTIDEBONDSIN CYCLIC AMIDINES	0.216379	NEGATIVE REGULATION OF BIOSYNTHETIC PROCESS	0.0641302	GTPASE BINDING	1.18937e-11	CELL PROJECTION	1.6047e-10
TRANSLATION INITIATION FACTOR ACTIVITY	0.216379	NEGATIVE REGULATION OF CELLULAR BIOSYNTHETIC PROCESS	0.0641302	RECEPTOR SIGNALING PROTEIN ACTIVITY	1.21856e-11	NEUROPEPTIDE BINDING	1.60786e-10
CELL DEVELOPMENT	0.217161	ANION CATION SYMPORTER ACTIVITY	0.0651229	MALE GONAD DEVELOPMENT	1.22225e-11	NEUROPEPTIDE RECEPTOR ACTIVITY	1.60786e-10
REGULATION OF BODY FLUID LEVELS	0.217161	OXIDOREDUCTASE ACTIVITY ACTING ON THE CH NH GROUP OF DONORS	0.0651229	RESPIRATORY GASEOUS EXCHANGE	1.24541e-11	APOPTOSIS GO	1.61967e-10
REGULATION OF SMALL GTPASE MEDIATED SIGNAL TRANSDUCTION	0.217945	PROTEIN RNA COMPLEX ASSEMBLY	0.0651229	REGULATION OF DNA METABOLIC PROCESS	1.24876e-11	RESPONSE TO RADIATION	1.69454e-10
ENDOPLASMIC RETICULUM	0.218882	SODIUM CHANNEL ACTIVITY	0.0651229	MEIOSIS I	1.57541e-11	CELL STRUCTURE DISASSEMBLY DURING APOPTOSIS	1.71037e-10
RAS GUANYL NUCLEOTIDE EXCHANGE FACTOR ACTIVITY	0.218882	DRUG BINDING	0.0657681	SYNAPTOGENESIS	1.63278e-11	TRANSLATION REGULATOR ACTIVITY	1.75058e-10
PROTEIN SERINE THREONINE PHOSPHATASE ACTIVITY	0.219502	ONE CARBON COMPOUND METABOLIC PROCESS	0.0662805	SYNAPSE ORGANIZATION AND BIOGENESIS	1.69641e-11	EXCITATORY EXTRACELLULAR LIGAND GATED ION CHANNEL ACTIVITY	1.76377e-10
IMMUNE SYSTEM DEVELOPMENT	0.222521	SINGLE STRANDED RNA BINDING	0.0669758	RIBOSOME	1.78735e-11	EXTRACELLULAR LIGAND GATED ION CHANNEL ACTIVITY	1.76377e-10
RESPONSE TO WOUNDING	0.223981	PROGRAMMED CELL DEATH	0.06721	TRANSCRIPTION INITIATION	1.9287e-11	CYTOKINE PRODUCTION	1.77662e-10
AMINO ACID METABOLIC PROCESS	0.224552	CELLULAR DEFENSE RESPONSE	0.0685722	PROTEIN TRANSPORT	1.94407e-11	INORGANIC ANION TRANSMEMBRANE TRANSPORTER ACTIVITY	1.79776e-10
CELLULAR MONOVALENT INORGANIC CATION HOMEOSTASIS	0.224675	HOMEOSTASIS OF NUMBER OF CELLS	0.0702831	BRAIN DEVELOPMENT	1.95355e-11	RNA SPLICINGVIA TRANSESTERIFICATION REACTIONS	1.95206e-10
ER NUCLEAR SIGNALING PATHWAY	0.224675	POSITIVE REGULATION OF BIOLOGICAL PROCESS	0.070543	GENERATION OF PRECURSOR METABOLITES AND ENERGY	1.96063e-11	TRANSFERASE ACTIVITY TRANSFERRING GROUPS OTHER THAN AMINO ACYL GROUPS	1.97852e-10
POSITIVE REGULATION OF CELLULAR COMPONENT ORGANIZATION AND BIOGENESIS	0.224675	MRNA PROCESSING GO 0006397	0.0716333	TRANS GOLGI NETWORK	1.98955e-11	REGIONALIZATION	2.03686e-10
REGULATION OF APOPTOSIS	0.224675	BIOSYNTHETIC PROCESS	0.0719092	NEUTRAL AMINO ACID TRANSMEMBRANE TRANSPORTER ACTIVITY	2.04569e-11	CATABOLIC PROCESS	2.07618e-10
NEGATIVE REGULATION OF SIGNAL TRANSDUCTION	0.224791	REGULATION OF PROTEIN METABOLIC PROCESS	0.0724397	CELL STRUCTURE DISASSEMBLY DURING APOPTOSIS	2.05174e-11	POSITIVE REGULATION OF RNA METABOLIC PROCESS	2.07618e-10
STRIATED MUSCLE DEVELOPMENT	0.228828	ACTIVATION OF IMMUNE RESPONSE	0.0725233	BLOOD COAGULATION	2.1801e-11	CYCLASE ACTIVITY	2.07747e-10
CERAMIDE METABOLIC PROCESS	0.229571	RECEPTOR SIGNALING PROTEIN SERINE THREONINE KINASE ACTIVITY	0.0736389	COAGULATION	2.1801e-11	PHOSPHORUS OXYGEN LYASE ACTIVITY	2.07747e-10
REGULATION OF DNA BINDING	0.230772	THIOLESTER HYDROLASE ACTIVITY	0.0740283	ADENYLATE CYCLASE ACTIVATION	2.53929e-11	PROTEIN SERINE THREONINE PHOSPHATASE ACTIVITY	2.18927e-10
DNA MODIFICATION	0.232397	INTRACELLULAR PROTEIN TRANSPORT	0.0758939	MICROTUBULE BASED MOVEMENT	2.5617e-11	HEART DEVELOPMENT	2.29462e-10
REGULATION OF DEVELOPMENTAL PROCESS	0.233966	REGULATION OF RESPONSE TO EXTERNAL STIMULUS	0.0767105	DEAMINASE ACTIVITY	3.00595e-11	MITOCHONDRION	2.29679e-10
CALCIUM ION BINDING	0.234288	HOMEOSTATIC PROCESS	0.0776777	VOLTAGE GATED POTASSIUM CHANNEL COMPLEX	3.27209e-11	CYSTEINE TYPE PEPTIDASE ACTIVITY	2.43949e-10
NEGATIVE REGULATION OF CELL ADHESION	0.234288	POSITIVE REGULATION OF TRANSPORT	0.0782734	NUCLEAR REPLICATION FORK	3.67184e-11	POSITIVE REGULATION OF TRANSCRIPTION	2.44203e-10
REGULATION OF MYELOID CELL DIFFERENTIATION	0.236185	SECRETION	0.0791549	SPHINGOLIPID METABOLIC PROCESS	3.88556e-11	BETA TUBULIN BINDING	2.44215e-10
RNA POLYMERASE II TRANSCRIPTION MEDIATOR ACTIVITY	0.236185	GENERATION OF PRECURSOR METABOLITES AND ENERGY	0.0800696	LYMPHOCYTE ACTIVATION	4.09348e-11	EXCRETION	2.45371e-10
REGULATION OF T CELL PROLIFERATION	0.237334	DOUBLE STRANDED RNA BINDING	0.0812912	STRESS ACTIVATED PROTEIN KINASE SIGNALING PATHWAY	4.1002e-11	GLUCOSE METABOLIC PROCESS	2.45424e-10
LAMELLIPODIUM	0.239258	LIPID TRANSPORTER ACTIVITY	0.0818665	VESICLE	4.1002e-11	NUCLEOBASENUCLEOSIDENUCLEOTIDE AND NUCLEIC ACID TRANSMEMBRANE TRANSPORTER ACTIVITY	2.49132e-10
CYCLIC NUCLEOTIDE METABOLIC PROCESS	0.241447	POTASSIUM CHANNEL ACTIVITY	0.0818665	ACTIVATION OF PROTEIN KINASE ACTIVITY	4.18617e-11	REGULATION OF NEURON APOPTOSIS	2.62763e-10
MEIOTIC CELL CYCLE	0.241625	PURINE RIBONUCLEOTIDE METABOLIC PROCESS	0.0820962	HEMATOPOIETIN INTERFERON CLASSD200 DOMAIN CYTOKINE RECEPTOR ACTIVITY	4.32704e-11	REGULATION OF NEUROGENESIS	2.67641e-10
RESPONSE TO DNA DAMAGE STIMULUS	0.242112	CELLULAR MONOVALENT INORGANIC CATION HOMEOSTASIS	0.0823173	LEUKOCYTE ACTIVATION	4.71558e-11	CELLULAR COMPONENT ASSEMBLY	2.68047e-10
PEPTIDASE ACTIVITY	0.245429	CELLULAR COMPONENT ASSEMBLY	0.0832845	PEPTIDE BINDING	4.71558e-11	ENVELOPE	2.76046e-10
DEVELOPMENTAL GROWTH	0.245695	WOUND HEALING	0.0841953	HOMEOSTATIC PROCESS	5.22447e-11	ORGANELLE ENVELOPE	2.76046e-10
HEME BIOSYNTHETIC PROCESS	0.245695	IMMUNE SYSTEM DEVELOPMENT	0.0843779	IMMUNOLOGICAL SYNAPSE	5.33871e-11	VESICLE MEDIATED TRANSPORT	2.83147e-10
HEME METABOLIC PROCESS	0.245695	LOW DENSITY LIPOPROTEIN BINDING	0.0843779	PROTEIN AMINO ACID N LINKED GLYCOSYLATION	5.54087e-11	EUKARYOTIC TRANSLATION INITIATION FACTOR 3 COMPLEX	3.44066e-10
ESTABLISHMENT OF ORGANELLE LOCALIZATION	0.247722	SYMPORTER ACTIVITY	0.0852687	COPPER ION BINDING	5.57957e-11	FOCAL ADHESION	3.48417e-10
REGULATION OF CELL MORPHOGENESIS	0.247722	EXOCYTOSIS	0.085335	PROTEIN RNA COMPLEX ASSEMBLY	5.71228e-11	MITOCHONDRIAL OUTER MEMBRANE	3.69775e-10
REGULATION OF CELL SHAPE	0.247722	CHROMATIN BINDING	0.0853421	LIGASE ACTIVITY FORMING CARBON NITROGEN BONDS	5.76324e-11	ACETYLGLUCOSAMINYLTRANSFERASE ACTIVITY	3.80019e-10
RESPIRATORY GASEOUS EXCHANGE	0.248001	CELL ACTIVATION	0.0861242	UBIQUITIN CYCLE	5.9687e-11	DNA DAMAGE RESPONSESIGNAL TRANSDUCTION BY P53 CLASS MEDIATOR	3.802e-10
CARBOHYDRATE BINDING	0.250407	PEROXISOME ORGANIZATION AND BIOGENESIS	0.0876868	REGULATION OF TRANSPORT	6.01335e-11	ADAPTIVE IMMUNE RESPONSE GO 0002460	4.00461e-10
HEMOSTASIS	0.251045	HYDROLASE ACTIVITY ACTING ON GLYCOSYL BONDS	0.087698	IMMUNE SYSTEM DEVELOPMENT	6.27399e-11	MACROMOLECULAR COMPLEX ASSEMBLY	4.00461e-10
HYDROLASE ACTIVITY ACTING ON GLYCOSYL BONDS	0.253465	VITAMIN BINDING	0.0894652	INOSITOL OR PHOSPHATIDYLINOSITOL KINASE ACTIVITY	6.27399e-11	DENDRITE	4.20239e-10
TRANSITION METAL ION TRANSMEMBRANE TRANSPORTER ACTIVITY	0.254612	RESPIRATORY GASEOUS EXCHANGE	0.0902511	PROTEIN SERINE THREONINE TYROSINE KINASE ACTIVITY	7.2424e-11	NUCLEOLAR PART	4.30633e-10
GOLGI VESICLE TRANSPORT	0.255468	ORGANELLE MEMBRANE	0.0911372	JNK CASCADE	8.06537e-11	INACTIVATION OF MAPK ACTIVITY	4.49292e-10
RECEPTOR SIGNALING PROTEIN ACTIVITY	0.255468	COFACTOR METABOLIC PROCESS	0.0913877	MEMBRANE FUSION	8.29142e-11	CELLULAR BIOSYNTHETIC PROCESS	4.51787e-10
RNA ELONGATION	0.255546	PROTEIN TRANSPORT	0.0920562	TRANSCRIPTION INITIATION FROM RNA POLYMERASE II PROMOTER	8.42868e-11	CELLULAR DEFENSE RESPONSE	4.77245e-10
POSITIVE REGULATION OF PHOSPHATE METABOLIC PROCESS	0.256986	DEFENSE RESPONSE	0.0930932	GLYCOLIPID METABOLIC PROCESS	8.53892e-11	RNA POLYMERASE II TRANSCRIPTION FACTOR ACTIVITYENHANCER BINDING	4.78398e-10
THIOLESTER HYDROLASE ACTIVITY	0.256986	MICROBODY MEMBRANE	0.0940027	GLYCOSPHINGOLIPID METABOLIC PROCESS	8.53892e-11	POSITIVE REGULATION OF NUCLEOBASENUCLEOSIDENUCLEOTIDE AND NUCLEIC ACID METABOLIC PROCESS	4.89525e-10
ONE CARBON COMPOUND METABOLIC PROCESS	0.258516	PEROXISOMAL MEMBRANE	0.0940027	RUFFLE	9.15261e-11	REGULATION OF MEMBRANE POTENTIAL	5.32541e-10
REGULATION OF JAK STAT CASCADE	0.26073	INTERCELLULAR JUNCTION ASSEMBLY	0.0946559	REGULATION OF MEMBRANE POTENTIAL	9.22313e-11	TRANSFERASE ACTIVITY TRANSFERRING GLYCOSYL GROUPS	5.4778e-10
MACROMOLECULAR COMPLEX	0.261233	SULFUR COMPOUND BIOSYNTHETIC PROCESS	0.0949908	MRNA METABOLIC PROCESS	9.95721e-11	LATE ENDOSOME	5.53334e-10
PEPTIDE METABOLIC PROCESS	0.261233	APICAL PART OF CELL	0.095339	TASTE RECEPTOR ACTIVITY	1.00958e-10	VOLTAGE GATED POTASSIUM CHANNEL COMPLEX	5.57747e-10
MYELOID LEUKOCYTE DIFFERENTIATION	0.261384	PEPTIDE BINDING	0.0959104	DNA DAMAGE RESPONSESIGNAL TRANSDUCTION BY P53 CLASS MEDIATOR	1.05866e-10	IONOTROPIC GLUTAMATE RECEPTOR ACTIVITY	5.67572e-10
NITROGEN COMPOUND CATABOLIC PROCESS	0.262051	T CELL DIFFERENTIATION	0.0964153	TRANSCRIPTION FACTOR TFIID COMPLEX	1.1336e-10	POSITIVE REGULATION OF MAPKKK CASCADE	5.98772e-10
PHOTOTRANSDUCTION	0.262326	CELLULAR LIPID METABOLIC PROCESS	0.0979693	CELLULAR DEFENSE RESPONSE	1.16647e-10	REGULATION OF MOLECULAR FUNCTION	6.0796e-10
CELLULAR LIPID METABOLIC PROCESS	0.26451	PROTEIN COMPLEX ASSEMBLY	0.0979693	CARBON CARBON LYASE ACTIVITY	1.18091e-10	ADAPTIVE IMMUNE RESPONSE	6.19311e-10
POTASSIUM CHANNEL ACTIVITY	0.265085	RIBONUCLEOPROTEIN COMPLEX BIOGENESIS AND ASSEMBLY	0.0982251	RNA CATABOLIC PROCESS	1.28385e-10	XENOBIOTIC METABOLIC PROCESS	6.21477e-10
DETECTION OF CHEMICAL STIMULUS	0.265586	TRANSFERASE ACTIVITY TRANSFERRING GLYCOSYL GROUPS	0.0985373	SUGAR BINDING	1.29816e-10	ATP DEPENDENT RNA HELICASE ACTIVITY	6.35827e-10
PROTEIN MATURATION	0.271442	LIPID METABOLIC PROCESS	0.0987318	RIBONUCLEOPROTEIN COMPLEX BIOGENESIS AND ASSEMBLY	1.3049e-10	SECRETION BY CELL	6.57275e-10
CARBOHYDRATE CATABOLIC PROCESS	0.272843	TRANSLATION REGULATOR ACTIVITY	0.0987318	SOLUTE SODIUM SYMPORTER ACTIVITY	1.35192e-10	COVALENT CHROMATIN MODIFICATION	6.85214e-10
CELLULAR CARBOHYDRATE CATABOLIC PROCESS	0.272843	ANION TRANSPORT	0.0989167	TRANSFERASE ACTIVITY TRANSFERRING HEXOSYL GROUPS	1.36857e-10	CELL RECOGNITION	7.03713e-10
PHOSPHOLIPASE C ACTIVITY	0.272843	COFACTOR BIOSYNTHETIC PROCESS	0.0995324	HEMOPOIESIS	1.4043e-10	TRANSLATION FACTOR ACTIVITY NUCLEIC ACID BINDING	7.03713e-10
SMALL CONJUGATING PROTEIN BINDING	0.272843	NUCLEOTIDE KINASE ACTIVITY	0.100204	POSITIVE REGULATION OF RESPONSE TO STIMULUS	1.5319e-10	UDP GLYCOSYLTRANSFERASE ACTIVITY	7.10832e-10
UBIQUITIN BINDING	0.272843	TRANSLATION FACTOR ACTIVITY NUCLEIC ACID BINDING	0.100204	RNA POLYMERASE II TRANSCRIPTION FACTOR ACTIVITYENHANCER BINDING	1.59072e-10	RESPONSE TO VIRUS	7.13711e-10
BRAIN DEVELOPMENT	0.274969	CELLULAR BIOSYNTHETIC PROCESS	0.100595	REGULATION OF GROWTH	1.6541e-10	MEIOSIS I	7.14774e-10
CARBOXYPEPTIDASE ACTIVITY	0.274969	CHROMATIN	0.100595	GLUTAMATE RECEPTOR ACTIVITY	1.67248e-10	STEROID DEHYDROGENASE ACTIVITY ACTING ON THE CH OH GROUP OF DONORSNAD OR NADP AS ACCEPTOR	7.23008e-10
LYSOSOME ORGANIZATION AND BIOGENESIS	0.275758	MICROTUBULE ASSOCIATED COMPLEX	0.100595	ENDOCYTIC VESICLE	1.72346e-10	REGULATION OF ANATOMICAL STRUCTURE MORPHOGENESIS	7.59933e-10
CYCLASE ACTIVITY	0.276834	REGULATION OF INTERFERON GAMMA BIOSYNTHETIC PROCESS	0.100595	RIBONUCLEOPROTEIN COMPLEX	1.77156e-10	POSITIVE REGULATION OF TRANSPORT	7.93078e-10
CYTOKINE AND CHEMOKINE MEDIATED SIGNALING PATHWAY	0.276834	REGULATION OF CELL ADHESION	0.101967	FATTY ACID BIOSYNTHETIC PROCESS	1.83343e-10	SUGAR BINDING	7.96274e-10
PHOSPHORUS OXYGEN LYASE ACTIVITY	0.276834	PHOSPHOLIPASE C ACTIVATION	0.102027	RESPONSE TO RADIATION	2.0165e-10	PROTEIN IMPORT	8.31736e-10
RECEPTOR MEDIATED ENDOCYTOSIS	0.277141	ACTIVATION OF NF KAPPAB TRANSCRIPTION FACTOR	0.102489	POSITIVE REGULATION OF SIGNAL TRANSDUCTION	2.09753e-10	INOSITOL OR PHOSPHATIDYLINOSITOL PHOSPHODIESTERASE ACTIVITY	8.37574e-10
REGULATION OF ENDOCYTOSIS	0.279386	TRANSMEMBRANE RECEPTOR PROTEIN SERINE THREONINE KINASE SIGNALING PATHWAY	0.10469	PROTEIN MODIFICATION BY SMALL PROTEIN CONJUGATION	2.40056e-10	ENDOPLASMIC RETICULUM PART	8.48075e-10
PROTEIN AMINO ACID LIPIDATION	0.28275	ATPASE ACTIVITY COUPLED TO MOVEMENT OF SUBSTANCES	0.105851	PROTEIN UBIQUITINATION	2.40056e-10	ESTABLISHMENT OF ORGANELLE LOCALIZATION	8.61265e-10
PROTEIN AMINO ACID DEPHOSPHORYLATION	0.287349	HYDROLASE ACTIVITY ACTING ON ACID ANHYDRIDESCATALYZING TRANSMEMBRANE MOVEMENT OF SUBSTANCES	0.105851	HORMONE BINDING	2.52562e-10	UBIQUITIN CYCLE	8.70522e-10
BASAL LAMINA	0.287791	PRIMARY ACTIVE TRANSMEMBRANE TRANSPORTER ACTIVITY	0.105851	METHYLTRANSFERASE ACTIVITY	2.54429e-10	SPINDLE MICROTUBULE	9.20308e-10
DNA DAMAGE CHECKPOINT	0.288595	REGULATION OF CATALYTIC ACTIVITY	0.108529	TRANSFERASE ACTIVITY TRANSFERRING ONE CARBON GROUPS	2.54429e-10	TRANSFERASE ACTIVITY TRANSFERRING ACYL GROUPS	9.9344e-10
FEMALE GAMETE GENERATION	0.288595	FEMALE PREGNANCY	0.108788	SPLICEOSOME	2.78987e-10	INTRINSIC TO GOLGI MEMBRANE	1.01467e-09
POSITIVE REGULATION OF EPITHELIAL CELL PROLIFERATION	0.289005	ANGIOGENESIS	0.109037	TRANSLATION REGULATOR ACTIVITY	2.86953e-10	DNA DIRECTED RNA POLYMERASE COMPLEX	1.01475e-09
PROTEIN OLIGOMERIZATION	0.289633	UDP GLYCOSYLTRANSFERASE ACTIVITY	0.109339	RESPONSE TO LIGHT STIMULUS	3.05752e-10	NUCLEAR DNA DIRECTED RNA POLYMERASE COMPLEX	1.01475e-09
EXOPEPTIDASE ACTIVITY	0.290965	LEUKOCYTE CHEMOTAXIS	0.109499	ACTIVATION OF NF KAPPAB TRANSCRIPTION FACTOR	3.05935e-10	RNA POLYMERASE COMPLEX	1.01475e-09
POSITIVE REGULATION OF HYDROLASE ACTIVITY	0.291144	REGULATION OF ENDOCYTOSIS	0.110427	DENDRITE	3.2946e-10	NEURITE DEVELOPMENT	1.11958e-09
REGULATION OF PROTEIN MODIFICATION PROCESS	0.292806	ACTIN FILAMENT	0.112669	POSITIVE REGULATION OF DNA BINDING	3.2946e-10	HYDRO LYASE ACTIVITY	1.14821e-09
PROTEIN LOCALIZATION	0.294723	LEUKOCYTE MIGRATION	0.114472	POSITIVE REGULATION OF TRANSCRIPTION FACTOR ACTIVITY	3.2946e-10	ANTIGEN BINDING	1.14979e-09
INORGANIC CATION TRANSMEMBRANE TRANSPORTER ACTIVITY	0.295041	REGULATION OF MEMBRANE POTENTIAL	0.115523	MULTI ORGANISM PROCESS	3.51307e-10	PEPTIDE RECEPTOR ACTIVITY	1.18528e-09
NUCLEASE ACTIVITY	0.295041	NEGATIVE REGULATION OF MYELOID CELL DIFFERENTIATION	0.117541	INOSITOL OR PHOSPHATIDYLINOSITOL PHOSPHODIESTERASE ACTIVITY	3.53344e-10	BONE REMODELING	1.19507e-09
EXTRINSIC TO PLASMA MEMBRANE	0.29867	POSITIVE REGULATION OF CELL MIGRATION	0.118074	FATTY ACID OXIDATION	3.69254e-10	POSITIVE REGULATION OF MAP KINASE ACTIVITY	1.30007e-09
MEIOTIC RECOMBINATION	0.299158	HEMOPOIETIC OR LYMPHOID ORGAN DEVELOPMENT	0.119086	PROTEIN AMINO ACID O LINKED GLYCOSYLATION	3.74497e-10	NEGATIVE REGULATION OF SECRETION	1.32298e-09
MAINTENANCE OF LOCALIZATION	0.302704	PROTEIN KINASE BINDING	0.119086	RAS GTPASE BINDING	3.87874e-10	PEPTIDYL TYROSINE PHOSPHORYLATION	1.32298e-09
GENE SILENCING	0.305046	NUCLEOLAR PART	0.119323	TRANSLATION	3.96453e-10	POSITIVE REGULATION OF PROTEIN MODIFICATION PROCESS	1.35324e-09
CELL SURFACE	0.309024	SOLUBLE FRACTION	0.119323	GLUTAMATE SIGNALING PATHWAY	3.9969e-10	CELL MATRIX ADHESION	1.44586e-09
PROTEOLYSIS	0.316192	MITOCHONDRIAL RIBOSOME	0.119996	PROTEIN AMINO ACID DEPHOSPHORYLATION	4.39653e-10	RECEPTOR SIGNALING PROTEIN SERINE THREONINE KINASE ACTIVITY	1.62359e-09
REGULATION OF MAPKKK CASCADE	0.318501	ORGANELLAR RIBOSOME	0.119996	DNA DIRECTED RNA POLYMERASE COMPLEX	4.41512e-10	METALLOEXOPEPTIDASE ACTIVITY	1.63546e-09
HISTONE MODIFICATION	0.319541	MEMBRANE BOUND VESICLE	0.120318	NUCLEAR DNA DIRECTED RNA POLYMERASE COMPLEX	4.41512e-10	MITOCHONDRIAL ENVELOPE	1.73185e-09
NEGATIVE REGULATION OF INTRACELLULAR TRANSPORT	0.322536	APOPTOSIS GO	0.120669	RNA POLYMERASE COMPLEX	4.41512e-10	MICROBODY MEMBRANE	1.75441e-09
INTEGRAL TO ORGANELLE MEMBRANE	0.323358	DEFENSE RESPONSE TO BACTERIUM	0.120669	STEROID HORMONE RECEPTOR BINDING	4.51751e-10	PEROXISOMAL MEMBRANE	1.75441e-09
DI TRI VALENT INORGANIC CATION TRANSMEMBRANE TRANSPORTER ACTIVITY	0.323419	MACROMOLECULE CATABOLIC PROCESS	0.121225	ANTIOXIDANT ACTIVITY	4.56528e-10	REGULATION OF GTPASE ACTIVITY	1.8096e-09
LIPID METABOLIC PROCESS	0.323896	MITOCHONDRION ORGANIZATION AND BIOGENESIS	0.121225	COFACTOR BIOSYNTHETIC PROCESS	4.56807e-10	COFACTOR METABOLIC PROCESS	1.83082e-09
DEFENSE RESPONSE	0.323978	ORGANELLE LOCALIZATION	0.121835	I KAPPAB KINASE NF KAPPAB CASCADE	4.74069e-10	CARBOHYDRATE TRANSPORT	1.83085e-09
PIGMENT BIOSYNTHETIC PROCESS	0.323978	ANTIOXIDANT ACTIVITY	0.122761	MYOSIN COMPLEX	5.04837e-10	PHOSPHATASE REGULATOR ACTIVITY	1.83245e-09
PIGMENT METABOLIC PROCESS	0.323978	POSITIVE REGULATION OF CELL DIFFERENTIATION	0.123098	TRANSFERASE ACTIVITY TRANSFERRING GROUPS OTHER THAN AMINO ACYL GROUPS	5.13038e-10	INTERACTION WITH HOST	1.89463e-09
INTRACELLULAR SIGNALING CASCADE	0.325114	LEUKOCYTE ACTIVATION	0.123526	POSITIVE REGULATION OF I KAPPAB KINASE NF KAPPAB CASCADE	5.15948e-10	MITOCHONDRIAL MEMBRANE	2.05949e-09
NEGATIVE REGULATION OF ANGIOGENESIS	0.325114	MANNOSYLTRANSFERASE ACTIVITY	0.126472	HYDROLASE ACTIVITY ACTING ON CARBON NITROGEN NOT PEPTIDEBONDSIN LINEAR AMIDES	5.4034e-10	MRNA METABOLIC PROCESS	2.1302e-09
NEGATIVE REGULATION OF CATALYTIC ACTIVITY	0.325114	MONOSACCHARIDE BINDING	0.127714	POSITIVE REGULATION OF CELL MIGRATION	5.58001e-10	NEGATIVE REGULATION OF DNA METABOLIC PROCESS	2.15007e-09
ENZYME LINKED RECEPTOR PROTEIN SIGNALING PATHWAY	0.325849	ACTIVATION OF MAPK ACTIVITY	0.128248	HISTONE ACETYLTRANSFERASE ACTIVITY	5.66168e-10	PROTEOGLYCAN BIOSYNTHETIC PROCESS	2.15007e-09
PHOSPHOINOSITIDE BINDING	0.325849	NUCLEAR PORE	0.128248	REGULATION OF ANGIOGENESIS	5.68258e-10	DYSTROPHIN ASSOCIATED GLYCOPROTEIN COMPLEX	2.16806e-09
SH2 DOMAIN BINDING	0.325849	NEUROTRANSMITTER SECRETION	0.129471	PEPTIDYL AMINO ACID MODIFICATION	5.97323e-10	PHOSPHOLIPASE C ACTIVITY	2.17627e-09
POSITIVE REGULATION OF PROTEIN AMINO ACID PHOSPHORYLATION	0.327356	DETECTION OF STIMULUS INVOLVED IN SENSORY PERCEPTION	0.129799	XENOBIOTIC METABOLIC PROCESS	6.21454e-10	ACTIVATION OF MAPK ACTIVITY	2.26969e-09
CYTOKINE BINDING	0.327701	CYTOPLASMIC MEMBRANE BOUND VESICLE	0.130374	REGULATION OF RESPONSE TO EXTERNAL STIMULUS	6.30302e-10	RNA SPLICING FACTOR ACTIVITYTRANSESTERIFICATION MECHANISM	2.325e-09
TUBULIN BINDING	0.328436	POSITIVE REGULATION OF EPITHELIAL CELL PROLIFERATION	0.130925	DNA DAMAGE CHECKPOINT	6.35923e-10	SYNAPTIC VESICLE	2.41822e-09
LOW DENSITY LIPOPROTEIN BINDING	0.329934	PROTEOLYSIS	0.132104	LIPOPROTEIN BIOSYNTHETIC PROCESS	6.56848e-10	PROTEIN DNA COMPLEX ASSEMBLY	2.48882e-09
MICROBODY PART	0.329934	REGULATION OF TRANSCRIPTION FACTOR ACTIVITY	0.132821	PROTEIN AMINO ACID LIPIDATION	6.56848e-10	ORGANELLE LOCALIZATION	2.545e-09
PEROXISOMAL PART	0.329934	PEPTIDYL TYROSINE PHOSPHORYLATION	0.133588	REGULATION OF RESPONSE TO STIMULUS	6.86702e-10	CALCIUM INDEPENDENT CELL CELL ADHESION	2.7852e-09
T CELL PROLIFERATION	0.330375	BLOOD COAGULATION	0.133724	REGIONALIZATION	7.69742e-10	MITOCHONDRIAL MEMBRANE ORGANIZATION AND BIOGENESIS	2.88431e-09
POSITIVE REGULATION OF MAPKKK CASCADE	0.330904	COAGULATION	0.133724	CELL CORTEX PART	8.06145e-10	SECRETION	2.94709e-09
G1 PHASE OF MITOTIC CELL CYCLE	0.331026	GLUTAMINE FAMILY AMINO ACID METABOLIC PROCESS	0.133724	REGULATION OF BINDING	9.21052e-10	GLUTAMINE FAMILY AMINO ACID METABOLIC PROCESS	3.10041e-09
DETECTION OF STIMULUS INVOLVED IN SENSORY PERCEPTION	0.332206	RNA SPLICINGVIA TRANSESTERIFICATION REACTIONS	0.133724	HEMOPOIETIC OR LYMPHOID ORGAN DEVELOPMENT	9.34719e-10	MICROTUBULE BASED MOVEMENT	3.10887e-09
INTEGRIN BINDING	0.332206	EARLY ENDOSOME	0.134211	HEART DEVELOPMENT	9.65631e-10	SIALYLTRANSFERASE ACTIVITY	3.57026e-09
PATTERN BINDING	0.333798	AXON GUIDANCE	0.134326	REGULATION OF PHOSPHORYLATION	9.691e-10	CYSTEINE TYPE ENDOPEPTIDASE ACTIVITY	3.68987e-09
PROTEIN TRANSPORTER ACTIVITY	0.333798	NUCLEOBASENUCLEOSIDENUCLEOTIDE AND NUCLEIC ACID TRANSMEMBRANE TRANSPORTER ACTIVITY	0.134326	POSITIVE REGULATION OF MAPKKK CASCADE	9.78106e-10	REGULATED SECRETORY PATHWAY	3.80455e-09
SOLUBLE FRACTION	0.33466	REGULATION OF MAP KINASE ACTIVITY	0.134326	CHAPERONE BINDING	1.06724e-09	ENDOPLASMIC RETICULUM MEMBRANE	3.84647e-09
APOPTOTIC NUCLEAR CHANGES	0.334871	RIBONUCLEASE ACTIVITY	0.134816	ER NUCLEAR SIGNALING PATHWAY	1.08842e-09	PROTEIN MODIFICATION BY SMALL PROTEIN CONJUGATION	3.84647e-09
ACTIN FILAMENT ORGANIZATION	0.335515	SPLICEOSOME ASSEMBLY	0.135619	CELL SURFACE	1.13831e-09	MRNA BINDING	4.05222e-09
RESPONSE TO STRESS	0.341431	RESPONSE TO RADIATION	0.138939	MAINTENANCE OF LOCALIZATION	1.15601e-09	CARBON CARBON LYASE ACTIVITY	4.22008e-09
REGULATION OF PHOSPHORYLATION	0.344319	REGULATION OF SYNAPSE STRUCTURE AND ACTIVITY	0.139275	EXOCYTOSIS	1.19182e-09	HISTONE MODIFICATION	4.27861e-09
AMINO SUGAR METABOLIC PROCESS	0.34464	CELL MATRIX JUNCTION	0.140383	ER TO GOLGI VESICLE MEDIATED TRANSPORT	1.20372e-09	LIGASE ACTIVITY	4.39857e-09
GLUCOSAMINE METABOLIC PROCESS	0.34464	NUCLEAR ENVELOPE	0.140612	MICROBODY	1.20372e-09	PML BODY	4.5204e-09
NEGATIVE REGULATION OF HYDROLASE ACTIVITY	0.34464	CALCIUM MEDIATED SIGNALING	0.141342	PEROXISOME	1.20372e-09	RNA BINDING	4.52528e-09
RIBONUCLEOPROTEIN COMPLEX	0.346407	REGULATION OF MOLECULAR FUNCTION	0.1414	SH2 DOMAIN BINDING	1.21625e-09	HYDROLASE ACTIVITY ACTING ON GLYCOSYL BONDS	4.53165e-09
PROTEIN TARGETING	0.34719	RIBONUCLEOPROTEIN BINDING	0.144466	CARBOXYLESTERASE ACTIVITY	1.32042e-09	CARBOXYLESTERASE ACTIVITY	4.91106e-09
PROTEIN DOMAIN SPECIFIC BINDING	0.349085	POSITIVE REGULATION OF MAP KINASE ACTIVITY	0.144697	CALMODULIN BINDING	1.40638e-09	MAPKKK CASCADE GO 0000165	4.97516e-09
NEGATIVE REGULATION OF SECRETION	0.35087	INTEGRATOR COMPLEX	0.144777	GROWTH	1.46371e-09	CELLULAR RESPONSE TO EXTRACELLULAR STIMULUS	4.98948e-09
DNA POLYMERASE ACTIVITY	0.351188	TISSUE REMODELING	0.14482	RNA PROCESSING	1.48639e-09	CELLULAR RESPONSE TO NUTRIENT LEVELS	4.98948e-09
REGULATION OF PROTEIN POLYMERIZATION	0.351188	CYCLIC NUCLEOTIDE PHOSPHODIESTERASE ACTIVITY	0.144877	ESTABLISHMENT OF ORGANELLE LOCALIZATION	1.64362e-09	POTASSIUM CHANNEL ACTIVITY	5.07365e-09
N ACETYLTRANSFERASE ACTIVITY	0.351547	VESICLE	0.146237	CELL CYCLE ARREST GO 0007050	1.65291e-09	REGULATION OF CELL MIGRATION	5.10819e-09
S PHASE OF MITOTIC CELL CYCLE	0.352188	REGULATION OF IMMUNE RESPONSE	0.146921	LEADING EDGE	1.97462e-09	VOLTAGE GATED SODIUM CHANNEL ACTIVITY	5.16132e-09
GLYCOPROTEIN METABOLIC PROCESS	0.352669	REGULATION OF PROTEIN IMPORT INTO NUCLEUS	0.149659	SPLICEOSOME ASSEMBLY	1.97462e-09	POSITIVE REGULATION OF TRANSCRIPTION FROM RNA POLYMERASE II PROMOTER	5.24204e-09
EXOCYTOSIS	0.355927	STEROID DEHYDROGENASE ACTIVITY	0.150798	INORGANIC ANION TRANSMEMBRANE TRANSPORTER ACTIVITY	2.06427e-09	RESPONSE TO ABIOTIC STIMULUS	5.26772e-09
GLYCOPROTEIN BIOSYNTHETIC PROCESS	0.355927	SYNAPSE PART	0.15288	METALLOEXOPEPTIDASE ACTIVITY	2.20414e-09	NUCLEAR ENVELOPE ENDOPLASMIC RETICULUM NETWORK	5.28217e-09
INTERFERON GAMMA BIOSYNTHETIC PROCESS	0.355927	INTEGRAL TO GOLGI MEMBRANE	0.153056	CYCLASE ACTIVITY	2.27834e-09	VOLTAGE GATED POTASSIUM CHANNEL ACTIVITY	5.28217e-09
SECRETION	0.355927	NUCLEAR MEMBRANE PART	0.153056	PHOSPHORUS OXYGEN LYASE ACTIVITY	2.27834e-09	COFACTOR BIOSYNTHETIC PROCESS	5.33063e-09
PHOSPHATE TRANSMEMBRANE TRANSPORTER ACTIVITY	0.357377	DNA DIRECTED RNA POLYMERASE COMPLEX	0.153536	MITOCHONDRIAL MEMBRANE PART	2.37585e-09	CELL MATRIX JUNCTION	5.49702e-09
PROTEIN IMPORT	0.357379	NUCLEAR DNA DIRECTED RNA POLYMERASE COMPLEX	0.153536	GABA RECEPTOR ACTIVITY	2.42304e-09	SOLUBLE FRACTION	5.75597e-09
N METHYLTRANSFERASE ACTIVITY	0.357773	RNA POLYMERASE COMPLEX	0.153536	COFACTOR TRANSPORT	2.76801e-09	LEUKOCYTE DIFFERENTIATION	5.84974e-09
RNA SPLICINGVIA TRANSESTERIFICATION REACTIONS	0.357773	CELLULAR RESPONSE TO EXTRACELLULAR STIMULUS	0.155961	BONE REMODELING	2.81761e-09	COATED VESICLE	6.55374e-09
SIGNAL SEQUENCE BINDING	0.36179	CELLULAR RESPONSE TO NUTRIENT LEVELS	0.155961	TISSUE REMODELING	2.81761e-09	NEGATIVE REGULATION OF MULTICELLULAR ORGANISMAL PROCESS	6.81702e-09
GLUCAN METABOLIC PROCESS	0.362136	NEGATIVE REGULATION OF CYTOKINE BIOSYNTHETIC PROCESS	0.156088	TRANSMEMBRANE RECEPTOR PROTEIN PHOSPHATASE ACTIVITY	2.8879e-09	MEMBRANE FUSION	6.957e-09
INSULIN RECEPTOR SIGNALING PATHWAY	0.362136	REGULATION OF MITOTIC CELL CYCLE	0.156948	HOMEOSTASIS OF NUMBER OF CELLS	3.06422e-09	DEPHOSPHORYLATION	7.15937e-09
RESPONSE TO TEMPERATURE STIMULUS	0.362136	LIPOPROTEIN BINDING	0.157923	SMALL PROTEIN CONJUGATING ENZYME ACTIVITY	3.33168e-09	LIGAND DEPENDENT NUCLEAR RECEPTOR ACTIVITY	7.15937e-09
ANTIOXIDANT ACTIVITY	0.363722	CARBOXYLESTERASE ACTIVITY	0.158884	ACTIN FILAMENT ORGANIZATION	3.39155e-09	PEROXISOME ORGANIZATION AND BIOGENESIS	7.17763e-09
GLYCOLIPID METABOLIC PROCESS	0.364049	POSITIVE REGULATION OF ANGIOGENESIS	0.159868	CORNIFIED ENVELOPE	3.40836e-09	TUBE DEVELOPMENT	7.71962e-09
GLYCOSPHINGOLIPID METABOLIC PROCESS	0.364049	INTERFERON GAMMA PRODUCTION	0.159897	ESTABLISHMENT AND OR MAINTENANCE OF CELL POLARITY	3.50892e-09	MICROTUBULE BINDING	8.28997e-09
PML BODY	0.364049	MITOCHONDRION	0.16029	HYDROLASE ACTIVITY ACTING ON CARBON NITROGEN NOT PEPTIDEBONDSIN CYCLIC AMIDINES	3.71921e-09	NUCLEOTIDE BIOSYNTHETIC PROCESS	8.29981e-09
REGULATION OF SIGNAL TRANSDUCTION	0.364049	APOPTOTIC PROGRAM	0.161252	CERAMIDE METABOLIC PROCESS	4.26296e-09	SPERM MOTILITY	8.45999e-09
TRANSCRIPTION FACTOR TFIID COMPLEX	0.36595	LATE ENDOSOME	0.161499	SPHINGOID METABOLIC PROCESS	4.26296e-09	NUCLEOBASENUCLEOSIDENUCLEOTIDE KINASE ACTIVITY	8.48259e-09
METHYLTRANSFERASE ACTIVITY	0.367662	TRANSFERASE ACTIVITY TRANSFERRING GROUPS OTHER THAN AMINO ACYL GROUPS	0.161499	SPERM MOTILITY	4.3793e-09	MITOCHONDRIAL PART	8.81032e-09
LIGASE ACTIVITY FORMING CARBON OXYGEN BONDS	0.371434	SMOOTH MUSCLE CONTRACTION GO 0006939	0.161956	PEPTIDYL TYROSINE PHOSPHORYLATION	4.88735e-09	AGING	8.88688e-09
PROTEIN HOMOOLIGOMERIZATION	0.373552	COLLAGEN	0.162447	REGULATION OF PROTEIN SECRETION	5.54404e-09	REGULATION OF MITOTIC CELL CYCLE	9.58294e-09
REGULATION OF HYDROLASE ACTIVITY	0.376112	REGULATION OF NUCLEOCYTOPLASMIC TRANSPORT	0.163113	DOUBLE STRANDED RNA BINDING	5.77892e-09	REGULATION OF GROWTH	1.00805e-08
ADAPTIVE IMMUNE RESPONSE	0.376168	BIOPOLYMER CATABOLIC PROCESS	0.163241	CELLULAR PROTEIN COMPLEX DISASSEMBLY	5.81598e-09	GOLGI ASSOCIATED VESICLE	1.03027e-08
AXON GUIDANCE	0.37687	EMBRYO IMPLANTATION	0.164041	MACROMOLECULAR COMPLEX DISASSEMBLY	5.81598e-09	INTRINSIC TO ORGANELLE MEMBRANE	1.04545e-08
REGULATION OF TRANSPORT	0.380919	CYTOPLASMIC VESICLE	0.165249	PROTEIN COMPLEX DISASSEMBLY	5.81598e-09	CYTOKINE AND CHEMOKINE MEDIATED SIGNALING PATHWAY	1.07502e-08
CELL PROJECTION	0.382202	INTERLEUKIN RECEPTOR ACTIVITY	0.166007	PROTEIN POLYMERIZATION	5.95831e-09	GLYCOLIPID METABOLIC PROCESS	1.0753e-08
RIBOSOME	0.382202	CALCIUM ION BINDING	0.166726	REGULATION OF BLOOD PRESSURE	6.41311e-09	GLYCOSPHINGOLIPID METABOLIC PROCESS	1.0753e-08
TRANSFERASE ACTIVITY TRANSFERRING ONE CARBON GROUPS	0.382202	DEVELOPMENTAL GROWTH	0.169615	OXIDOREDUCTASE ACTIVITY ACTING ON PEROXIDE AS ACCEPTOR	6.50378e-09	MITOCHONDRIAL INNER MEMBRANE	1.10467e-08
PROTEIN METABOLIC PROCESS	0.385503	VIRAL REPRODUCTIVE PROCESS	0.170318	NLS BEARING SUBSTRATE IMPORT INTO NUCLEUS	6.71008e-09	PEPTIDE METABOLIC PROCESS	1.13948e-08
AXONOGENESIS	0.386794	MITOCHONDRIAL MEMBRANE ORGANIZATION AND BIOGENESIS	0.17034	AXONOGENESIS	6.81666e-09	PHOSPHOLIPASE C ACTIVATION	1.15899e-08
NEGATIVE REGULATION OF APOPTOSIS	0.390788	DNA DAMAGE RESPONSESIGNAL TRANSDUCTION BY P53 CLASS MEDIATOR	0.170803	SMALL CONJUGATING PROTEIN LIGASE ACTIVITY	6.96913e-09	POSITIVE REGULATION OF BINDING	1.20048e-08
ACTIVATION OF MAPK ACTIVITY	0.392068	CELLULAR PROTEIN COMPLEX ASSEMBLY	0.171075	SINGLE STRANDED RNA BINDING	7.46041e-09	REGULATION OF HOMEOSTATIC PROCESS	1.20048e-08
BASE EXCISION REPAIR	0.392068	RESPONSE TO LIGHT STIMULUS	0.171107	S ADENOSYLMETHIONINE DEPENDENT METHYLTRANSFERASE ACTIVITY	7.72943e-09	TRANSLATION	1.22985e-08
MULTI ORGANISM PROCESS	0.392068	SUPEROXIDE METABOLIC PROCESS	0.171829	MAINTENANCE OF PROTEIN LOCALIZATION	7.97941e-09	RECEPTOR MEDIATED ENDOCYTOSIS	1.31869e-08
TISSUE REMODELING	0.397453	PEPTIDYL AMINO ACID MODIFICATION	0.17258	REGULATION OF MAPKKK CASCADE	8.07214e-09	NF KAPPAB BINDING	1.38065e-08
CELL RECOGNITION	0.397587	NEGATIVE REGULATION OF PHOSPHATE METABOLIC PROCESS	0.173424	CORTICAL CYTOSKELETON	8.07825e-09	EXOCYTOSIS	1.38979e-08
REGULATION OF HOMEOSTATIC PROCESS	0.4021	NEGATIVE REGULATION OF PHOSPHORYLATION	0.173424	SPINDLE MICROTUBULE	9.66714e-09	THIOLESTER HYDROLASE ACTIVITY	1.41009e-08
HISTONE DEACETYLASE COMPLEX	0.402255	CYSTEINE TYPE ENDOPEPTIDASE ACTIVITY	0.173846	TRANSFERASE ACTIVITY TRANSFERRING ACYL GROUPS	9.66779e-09	G2 M TRANSITION OF MITOTIC CELL CYCLE	1.45854e-08
LYASE ACTIVITY	0.40239	ENERGY DERIVATION BY OXIDATION OF ORGANIC COMPOUNDS	0.174346	ALDO KETO REDUCTASE ACTIVITY	9.67726e-09	LAMELLIPODIUM	1.55133e-08
REGULATION OF CHROMOSOME ORGANIZATION AND BIOGENESIS	0.404272	PROTEIN TRANSPORTER ACTIVITY	0.17492	EXCRETION	9.87976e-09	RAS GTPASE BINDING	1.58688e-08
SECRETION BY CELL	0.405349	CELLULAR POLYSACCHARIDE METABOLIC PROCESS	0.174922	BRUSH BORDER	9.90998e-09	TRANSFERASE ACTIVITY TRANSFERRING HEXOSYL GROUPS	1.59354e-08
ACTIN FILAMENT POLYMERIZATION	0.409621	REGULATION OF LIPID METABOLIC PROCESS	0.174941	AXON GUIDANCE	1.12524e-08	ORGANELLE INNER MEMBRANE	1.62298e-08
AMINO ACID CATABOLIC PROCESS	0.409621	ANATOMICAL STRUCTURE FORMATION	0.179313	PHOSPHATASE REGULATOR ACTIVITY	1.13581e-08	CARBON OXYGEN LYASE ACTIVITY	1.62786e-08
CYSTEINE TYPE PEPTIDASE ACTIVITY	0.409621	T CELL ACTIVATION	0.179711	CELL CORTEX	1.23396e-08	HETEROGENEOUS NUCLEAR RIBONUCLEOPROTEIN COMPLEX	1.64746e-08
NEGATIVE REGULATION OF DEVELOPMENTAL PROCESS	0.409621	CYTOKINE PRODUCTION	0.181502	MICROTUBULE ORGANIZING CENTER PART	1.29464e-08	ACTIN FILAMENT ORGANIZATION	1.65036e-08
VESICLE MEDIATED TRANSPORT	0.409621	REGULATION OF TRANSLATION	0.181951	ACETYLGLUCOSAMINYLTRANSFERASE ACTIVITY	1.32642e-08	CARBONATE DEHYDRATASE ACTIVITY	1.66639e-08
NUCLEOLUS	0.411707	INTERPHASE	0.184337	TUBE DEVELOPMENT	1.36244e-08	PROTEIN FOLDING	1.67407e-08
REGULATION OF GROWTH	0.413768	NUCLEOTIDE EXCISION REPAIR	0.187193	ACTIN FILAMENT	1.38839e-08	NUCLEAR IMPORT	1.71579e-08
ENDORIBONUCLEASE ACTIVITY	0.415075	APOPTOTIC NUCLEAR CHANGES	0.188803	CYTOKINE BINDING	1.47159e-08	PROTEIN IMPORT INTO NUCLEUS	1.71579e-08
REGULATION OF NEURON APOPTOSIS	0.415182	SMALL PROTEIN CONJUGATING ENZYME ACTIVITY	0.190254	CELL MATRIX ADHESION	1.47459e-08	AEROBIC RESPIRATION	1.75887e-08
CELLULAR MACROMOLECULE METABOLIC PROCESS	0.416424	CELL SURFACE	0.19143	CELL SUBSTRATE ADHESION	1.47459e-08	EPITHELIAL TO MESENCHYMAL TRANSITION	1.76828e-08
FOCAL ADHESION FORMATION	0.419086	NEGATIVE REGULATION OF RESPONSE TO STIMULUS	0.193934	SPECIFIC TRANSCRIPTIONAL REPRESSOR ACTIVITY	1.49998e-08	MONOCARBOXYLIC ACID TRANSMEMBRANE TRANSPORTER ACTIVITY	1.85465e-08
POSITIVE REGULATION OF TRANSLATION	0.41914	PHOSPHATASE BINDING	0.194602	REGULATION OF CYTOKINE BIOSYNTHETIC PROCESS	1.50892e-08	TRANSCRIPTION FROM RNA POLYMERASE III PROMOTER	1.86378e-08
DEFENSE RESPONSE TO VIRUS	0.419634	NEGATIVE REGULATION OF SECRETION	0.197046	TRANSFERASE ACTIVITY TRANSFERRING ALKYL OR ARYLOTHER THAN METHYLGROUPS	1.56157e-08	CELLULAR RESPONSE TO STRESS	1.8784e-08
COATED MEMBRANE	0.419989	DNA DIRECTED RNA POLYMERASEII CORE COMPLEX	0.197129	TRANSLATION FACTOR ACTIVITY NUCLEIC ACID BINDING	1.61485e-08	CYTOKINE BIOSYNTHETIC PROCESS	2.06031e-08
DOUBLE STRAND BREAK REPAIR	0.419989	NEGATIVE REGULATION OF MULTICELLULAR ORGANISMAL PROCESS	0.198544	UBIQUITIN PROTEIN LIGASE ACTIVITY	1.61991e-08	CYTOKINE METABOLIC PROCESS	2.06031e-08
MEMBRANE COAT	0.419989	NEGATIVE REGULATION OF GROWTH	0.200172	THYROID HORMONE RECEPTOR BINDING	1.63572e-08	SMALL PROTEIN CONJUGATING ENZYME ACTIVITY	2.09796e-08
VESICLE COAT	0.419989	GALACTOSYLTRANSFERASE ACTIVITY	0.204199	DEVELOPMENTAL GROWTH	2.00689e-08	SULFUR METABOLIC PROCESS	2.10669e-08
CELL ACTIVATION	0.422931	LYMPHOCYTE ACTIVATION	0.204839	RESPONSE TO OXIDATIVE STRESS	2.20471e-08	MITOCHONDRIAL MEMBRANE PART	2.27451e-08
CELLULAR CATABOLIC PROCESS	0.422931	ATP DEPENDENT DNA HELICASE ACTIVITY	0.204922	INTERFERON GAMMA PRODUCTION	2.24448e-08	NOTCH SIGNALING PATHWAY	2.3145e-08
CELLULAR PROTEIN METABOLIC PROCESS	0.423803	PHOSPHOLIPID METABOLIC PROCESS	0.207251	INTERLEUKIN 2 PRODUCTION	2.31552e-08	AXONOGENESIS	2.43717e-08
REGULATION OF CATALYTIC ACTIVITY	0.425946	INTERPHASE OF MITOTIC CELL CYCLE	0.209832	POLYSACCHARIDE METABOLIC PROCESS	2.52927e-08	OXIDOREDUCTASE ACTIVITY ACTING ON THE CH CH GROUP OF DONORS	2.44438e-08
EPIDERMAL GROWTH FACTOR RECEPTOR SIGNALING PATHWAY	0.428726	REGULATED SECRETORY PATHWAY	0.211365	RESPONSE TO ABIOTIC STIMULUS	2.55056e-08	UNFOLDED PROTEIN BINDING	2.46029e-08
SYNAPSE ORGANIZATION AND BIOGENESIS	0.428726	REGULATION OF JNK CASCADE	0.21399	REGULATION OF TRANSLATIONAL INITIATION	2.62775e-08	STEROID DEHYDROGENASE ACTIVITY	2.52338e-08
MANNOSYLTRANSFERASE ACTIVITY	0.43277	STRIATED MUSCLE DEVELOPMENT	0.21561	NUCLEAR CHROMATIN	2.62927e-08	NUCLEAR SPECK	2.6372e-08
PEPTIDYL TYROSINE PHOSPHORYLATION	0.436095	CELL PROJECTION PART	0.216603	THIOLESTER HYDROLASE ACTIVITY	3.05727e-08	HYDROLASE ACTIVITY HYDROLYZING N GLYCOSYL COMPOUNDS	2.73269e-08
ENDONUCLEASE ACTIVITY GO 0016893	0.437401	TRANSFERASE ACTIVITY TRANSFERRING ACYL GROUPS	0.220351	GOLGI ASSOCIATED VESICLE	3.05806e-08	BRUSH BORDER	2.97021e-08
PHOSPHORIC DIESTER HYDROLASE ACTIVITY	0.437401	RIBONUCLEOPROTEIN COMPLEX	0.220908	SECRETORY GRANULE	3.51255e-08	ACETYLTRANSFERASE ACTIVITY	3.06633e-08
INTEGRAL TO ENDOPLASMIC RETICULUM MEMBRANE	0.439303	RNA POLYMERASE II TRANSCRIPTION FACTOR ACTIVITYENHANCER BINDING	0.222376	FEMALE GAMETE GENERATION	3.84483e-08	ENDOCYTIC VESICLE	3.36136e-08
INTRINSIC TO ENDOPLASMIC RETICULUM MEMBRANE	0.439303	POSITIVE REGULATION OF MAPKKK CASCADE	0.223108	ENDOPLASMIC RETICULUM PART	3.95032e-08	CHAPERONE BINDING	3.38973e-08
TRANSCRIPTION INITIATION	0.439303	ENDOPLASMIC RETICULUM MEMBRANE	0.224702	INSULIN LIKE GROWTH FACTOR RECEPTOR BINDING	4.52141e-08	POSITIVE REGULATION OF EPITHELIAL CELL PROLIFERATION	3.44653e-08
LYMPHOCYTE ACTIVATION	0.440757	TRANSITION METAL ION TRANSMEMBRANE TRANSPORTER ACTIVITY	0.225751	INORGANIC CATION TRANSMEMBRANE TRANSPORTER ACTIVITY	4.83489e-08	RESPONSE TO HEAT	3.44653e-08
RNA PROCESSING	0.440757	AXONOGENESIS	0.225884	SYNAPSE	5.53289e-08	RHO GTPASE ACTIVATOR ACTIVITY	3.44991e-08
DNA DIRECTED DNA POLYMERASE ACTIVITY	0.441013	POSITIVE REGULATION OF TRANSCRIPTION FROM RNA POLYMERASE II PROMOTER	0.227044	KINASE INHIBITOR ACTIVITY	5.60386e-08	RESPONSE TO TEMPERATURE STIMULUS	3.46752e-08
EXONUCLEASE ACTIVITY	0.441013	PROTEIN TARGETING TO MITOCHONDRION	0.227851	PROTEIN KINASE INHIBITOR ACTIVITY	5.60386e-08	EXTERNAL SIDE OF PLASMA MEMBRANE	3.75258e-08
SECONDARY METABOLIC PROCESS	0.441545	GENERAL RNA POLYMERASE II TRANSCRIPTION FACTOR ACTIVITY	0.231015	NEGATIVE REGULATION OF CELL CYCLE	5.8594e-08	INTEGRAL TO ENDOPLASMIC RETICULUM MEMBRANE	3.78228e-08
FEMALE PREGNANCY	0.441551	DI TRI VALENT INORGANIC CATION TRANSMEMBRANE TRANSPORTER ACTIVITY	0.232036	HYDROLASE ACTIVITY ACTING ON CARBON NITROGEN NOT PEPTIDEBONDS	6.12503e-08	INTRINSIC TO ENDOPLASMIC RETICULUM MEMBRANE	3.78228e-08
MONOCARBOXYLIC ACID TRANSMEMBRANE TRANSPORTER ACTIVITY	0.441551	PHOTOTRANSDUCTION	0.232679	OXIDOREDUCTASE ACTIVITY ACTING ON THE CH CH GROUP OF DONORS	7.01756e-08	PROTEIN STABILIZATION	3.83702e-08
AXON	0.445879	FOCAL ADHESION FORMATION	0.233483	CARBOXYPEPTIDASE ACTIVITY	7.48936e-08	METHYLTRANSFERASE ACTIVITY	3.97382e-08
AEROBIC RESPIRATION	0.449676	GLUCAN METABOLIC PROCESS	0.233483	PROTEIN STABILIZATION	7.79486e-08	POSITIVE REGULATION OF CYTOKINE PRODUCTION	4.11305e-08
MICROTUBULE POLYMERIZATION OR DEPOLYMERIZATION	0.450305	GLYCOLIPID METABOLIC PROCESS	0.233483	ATPASE ACTIVITY COUPLED TO TRANSMEMBRANE MOVEMENT OF IONS	7.80486e-08	MANNOSYLTRANSFERASE ACTIVITY	4.5025e-08
G1 PHASE	0.452517	GLYCOSPHINGOLIPID METABOLIC PROCESS	0.233483	INACTIVATION OF MAPK ACTIVITY	7.85741e-08	LIPOPROTEIN METABOLIC PROCESS	4.68814e-08
CELL CYCLE ARREST GO 0007050	0.453456	GUANYL NUCLEOTIDE EXCHANGE FACTOR ACTIVITY	0.233483	NEGATIVE REGULATION OF MAP KINASE ACTIVITY	7.85741e-08	POSITIVE REGULATION OF CATALYTIC ACTIVITY	4.85261e-08
CELLULAR POLYSACCHARIDE METABOLIC PROCESS	0.45563	GTP BINDING	0.233566	MONOVALENT INORGANIC CATION TRANSMEMBRANE TRANSPORTER ACTIVITY	7.94946e-08	B CELL ACTIVATION	4.85519e-08
LIPID TRANSPORTER ACTIVITY	0.45563	GUANYL NUCLEOTIDE BINDING	0.233566	REGULATION OF TRANSFORMING GROWTH FACTOR BETA RECEPTOR SIGNALING PATHWAY	8.72216e-08	PROTEIN KINASE CASCADE	4.93531e-08
MITOCHONDRION	0.45563	GENE SILENCING	0.235359	EXCITATORY EXTRACELLULAR LIGAND GATED ION CHANNEL ACTIVITY	8.84542e-08	ER NUCLEAR SIGNALING PATHWAY	5.12538e-08
NUCLEOLAR PART	0.45563	ISOPRENOID METABOLIC PROCESS	0.235705	EXTRACELLULAR LIGAND GATED ION CHANNEL ACTIVITY	8.84542e-08	MAINTENANCE OF PROTEIN LOCALIZATION	5.27489e-08
RIBONUCLEOPROTEIN BINDING	0.45563	REGULATION OF GROWTH	0.236864	CENTROSOME CYCLE	9.27994e-08	LIGASE ACTIVITY FORMING CARBON NITROGEN BONDS	5.38396e-08
COFACTOR METABOLIC PROCESS	0.45678	NUCLEAR MEMBRANE	0.248204	REGULATION OF CYTOKINE PRODUCTION	9.8569e-08	NEGATIVE REGULATION OF TRANSLATION	5.74645e-08
CYTOSKELETON DEPENDENT INTRACELLULAR TRANSPORT	0.45678	TRANSCRIPTION INITIATION FROM RNA POLYMERASE II PROMOTER	0.248204	REGULATION OF IMMUNE RESPONSE	1.21728e-07	CELLULAR COMPONENT DISASSEMBLY	6.09123e-08
TRNA METABOLIC PROCESS	0.45678	VIRAL REPRODUCTION	0.250911	MYELOID CELL DIFFERENTIATION	1.34256e-07	NEGATIVE REGULATION OF MAP KINASE ACTIVITY	6.129e-08
UDP GLYCOSYLTRANSFERASE ACTIVITY	0.458835	PHOSPHOLIPASE C ACTIVITY	0.252766	ACID AMINO ACID LIGASE ACTIVITY	1.35172e-07	TRANSFERASE ACTIVITY TRANSFERRING ONE CARBON GROUPS	6.20176e-08
FATTY ACID BIOSYNTHETIC PROCESS	0.459194	COLLAGEN BINDING	0.255671	RIBONUCLEOPROTEIN BINDING	1.40001e-07	MICROTUBULE ORGANIZING CENTER ORGANIZATION AND BIOGENESIS	6.27099e-08
ENDOCYTIC VESICLE	0.464316	ENDORIBONUCLEASE ACTIVITY	0.255969	INTERACTION WITH HOST	1.40335e-07	RESPONSE TO OXIDATIVE STRESS	6.47744e-08
NUCLEAR TRANSPORT	0.464316	UBIQUITIN PROTEIN LIGASE ACTIVITY	0.258311	COLLAGEN	1.43601e-07	CARBOHYDRATE CATABOLIC PROCESS	6.55163e-08
NUCLEOCYTOPLASMIC TRANSPORT	0.464316	HYDROLASE ACTIVITY ACTING ON CARBON NITROGEN NOT PEPTIDEBONDS	0.260368	DNA DAMAGE RESPONSESIGNAL TRANSDUCTION	1.43937e-07	CELLULAR CARBOHYDRATE CATABOLIC PROCESS	6.55163e-08
N ACYLTRANSFERASE ACTIVITY	0.468424	NUCLEAR ENVELOPE ENDOPLASMIC RETICULUM NETWORK	0.260368	REGULATION OF CELL DIFFERENTIATION	1.47861e-07	LIPASE ACTIVITY	7.35824e-08
TRANS GOLGI NETWORK TRANSPORT VESICLE	0.468424	TRANSFERASE ACTIVITY TRANSFERRING PENTOSYL GROUPS	0.26259	INTEGRAL TO ORGANELLE MEMBRANE	1.63251e-07	REGULATION OF TRANSLATION	7.45522e-08
NUCLEOBASENUCLEOSIDENUCLEOTIDE KINASE ACTIVITY	0.474423	CALCIUM ION TRANSMEMBRANE TRANSPORTER ACTIVITY	0.263728	INTRINSIC TO ORGANELLE MEMBRANE	1.63251e-07	STEROID HORMONE RECEPTOR BINDING	7.5251e-08
PROTEIN AMINO ACID ADP RIBOSYLATION	0.474423	LAMELLIPODIUM	0.263728	MEMBRANE LIPID METABOLIC PROCESS	1.67586e-07	REGULATION OF DNA REPLICATION	7.7196e-08
POSITIVE REGULATION OF MAP KINASE ACTIVITY	0.477547	CATION TRANSPORTING ATPASE ACTIVITY	0.265721	STEROL BINDING	1.7929e-07	U12 DEPENDENT SPLICEOSOME	7.8368e-08
RESPONSE TO BIOTIC STIMULUS	0.477547	GLIOGENESIS	0.266744	DNA DIRECTED RNA POLYMERASEII CORE COMPLEX	1.83195e-07	RESPONSE TO HYPOXIA	8.00062e-08
ANTIPORTER ACTIVITY	0.478116	DETECTION OF STIMULUS	0.267715	SERINE TYPE ENDOPEPTIDASE INHIBITOR ACTIVITY	1.85655e-07	REGULATION OF CELL DIFFERENTIATION	8.0777e-08
INTERLEUKIN BINDING	0.478116	MYELOID CELL DIFFERENTIATION	0.267715	SMALL GTPASE BINDING	1.94116e-07	TRANSFERASE ACTIVITY TRANSFERRING PENTOSYL GROUPS	8.65169e-08
CATABOLIC PROCESS	0.478592	TRANSFORMING GROWTH FACTOR BETA RECEPTOR SIGNALING PATHWAY	0.268327	EPITHELIAL TO MESENCHYMAL TRANSITION	1.9749e-07	PROTEIN METHYLTRANSFERASE ACTIVITY	9.12699e-08
ESTABLISHMENT OF PROTEIN LOCALIZATION	0.478592	PORE COMPLEX	0.270673	CYTOSKELETON DEPENDENT INTRACELLULAR TRANSPORT	2.20475e-07	HOMEOSTASIS OF NUMBER OF CELLS	9.83618e-08
POSITIVE REGULATION OF PROTEIN SECRETION	0.478592	IMMUNOLOGICAL SYNAPSE	0.271825	NEUROPEPTIDE HORMONE ACTIVITY	2.40602e-07	THYROID HORMONE RECEPTOR BINDING	9.85876e-08
PROTEIN STABILIZATION	0.478592	ATP DEPENDENT RNA HELICASE ACTIVITY	0.274909	NICOTINIC ACETYLCHOLINE ACTIVATED CATION SELECTIVE CHANNEL ACTIVITY	2.54428e-07	INDUCTION OF APOPTOSIS BY INTRACELLULAR SIGNALS	9.88698e-08
REGULATION OF ENDOTHELIAL CELL PROLIFERATION	0.478592	B CELL DIFFERENTIATION	0.275338	NICOTINIC ACETYLCHOLINE GATED RECEPTOR CHANNEL COMPLEX	2.54428e-07	CELL SURFACE	1.00292e-07
POSITIVE REGULATION OF I KAPPAB KINASE NF KAPPAB CASCADE	0.482153	IMMUNE EFFECTOR PROCESS	0.275338	ACETYLTRANSFERASE ACTIVITY	2.59459e-07	CYTOPLASMIC VESICLE MEMBRANE	1.01314e-07
DYSTROPHIN ASSOCIATED GLYCOPROTEIN COMPLEX	0.483906	PROTEIN EXPORT FROM NUCLEUS	0.275461	NEGATIVE REGULATION OF TRANSPORT	3.39072e-07	CYTOPLASMIC VESICLE PART	1.01314e-07
MICROVILLUS	0.484328	TRANSMEMBRANE RECEPTOR PROTEIN PHOSPHATASE ACTIVITY	0.275461	INSULIN RECEPTOR SIGNALING PATHWAY	3.42282e-07	ATPASE ACTIVITY COUPLED TO MOVEMENT OF SUBSTANCES	1.02414e-07
LEUKOCYTE ACTIVATION	0.486305	RESPONSE TO OTHER ORGANISM	0.27576	DNA MODIFICATION	4.45314e-07	HYDROLASE ACTIVITY ACTING ON ACID ANHYDRIDESCATALYZING TRANSMEMBRANE MOVEMENT OF SUBSTANCES	1.02414e-07
POSITIVE REGULATION OF TRANSCRIPTION FROM RNA POLYMERASE II PROMOTER	0.488146	TRANSLATION	0.278111	EXTERNAL SIDE OF PLASMA MEMBRANE	4.51282e-07	PRIMARY ACTIVE TRANSMEMBRANE TRANSPORTER ACTIVITY	1.02414e-07
VIRAL REPRODUCTIVE PROCESS	0.488146	INTERLEUKIN BINDING	0.282887	CELLULAR COMPONENT DISASSEMBLY	5.34557e-07	ENDONUCLEASE ACTIVITY GO 0016893	1.04094e-07
ACETYLGALACTOSAMINYLTRANSFERASE ACTIVITY	0.488927	N TERMINAL PROTEIN AMINO ACID MODIFICATION	0.284108	RIBOSOMAL SUBUNIT	5.46954e-07	REGULATION OF TRANSCRIPTION FACTOR ACTIVITY	1.08194e-07
METABOTROPIC GLUTAMATEGABA B LIKE RECEPTOR ACTIVITY	0.489375	NLS BEARING SUBSTRATE IMPORT INTO NUCLEUS	0.285963	ENDOTHELIAL CELL MIGRATION	6.72868e-07	INTEGRAL TO ORGANELLE MEMBRANE	1.08294e-07
INTERFERON GAMMA PRODUCTION	0.494844	UNFOLDED PROTEIN RESPONSE	0.28697	ANION TRANSPORT	6.82774e-07	ADENYLATE CYCLASE ACTIVATION	1.13405e-07
INTRINSIC TO ORGANELLE MEMBRANE	0.494844	CHROMATIN REMODELING	0.292593	NEGATIVE REGULATION OF ANGIOGENESIS	7.85227e-07	LIPOPROTEIN BIOSYNTHETIC PROCESS	1.13631e-07
MONOVALENT INORGANIC CATION TRANSMEMBRANE TRANSPORTER ACTIVITY	0.496506	SULFURIC ESTER HYDROLASE ACTIVITY	0.293496	ER GOLGI INTERMEDIATE COMPARTMENT	7.93187e-07	POSITIVE REGULATION OF DNA BINDING	1.21049e-07
RNA BINDING	0.496506	INTERLEUKIN 1 SECRETION	0.296769	MITOCHONDRIAL MEMBRANE ORGANIZATION AND BIOGENESIS	8.47956e-07	POSITIVE REGULATION OF TRANSCRIPTION FACTOR ACTIVITY	1.21049e-07
PHOSPHATASE REGULATOR ACTIVITY	0.496871	MICROBODY	0.29867	POSITIVE REGULATION OF IMMUNE RESPONSE	8.71096e-07	PROTON TRANSPORTING TWO SECTOR ATPASE COMPLEX	1.28217e-07
RESPONSE TO LIGHT STIMULUS	0.498298	PEROXISOME	0.29867	RESPONSE TO BIOTIC STIMULUS	9.2943e-07	RIBONUCLEOPROTEIN BINDING	1.28217e-07
BONE REMODELING	0.498523	SMALL NUCLEAR RIBONUCLEOPROTEIN COMPLEX	0.300724	TRNA METABOLIC PROCESS	9.34731e-07	CENTROSOME CYCLE	1.30946e-07
SODIUM CHANNEL ACTIVITY	0.498523	PHOSPHOLIPID TRANSPORTER ACTIVITY	0.301904	REGULATION OF DNA REPLICATION	9.4559e-07	UBIQUITIN PROTEIN LIGASE ACTIVITY	1.33024e-07
LIPASE ACTIVITY	0.502509	VOLTAGE GATED POTASSIUM CHANNEL COMPLEX	0.302316	VACUOLE ORGANIZATION AND BIOGENESIS	9.47752e-07	CENTROSOME ORGANIZATION AND BIOGENESIS	1.39783e-07
ENDOMEMBRANE SYSTEM	0.507685	CELL SUBSTRATE ADHERENS JUNCTION	0.30785	GLAND DEVELOPMENT	9.77959e-07	HORMONE SECRETION	1.41993e-07
PHOSPHOLIPASE A2 ACTIVITY	0.515215	POSITIVE REGULATION OF IMMUNE RESPONSE	0.308262	PHOSPHOLIPID TRANSPORTER ACTIVITY	1.00528e-06	INTEGRAL TO GOLGI MEMBRANE	1.42594e-07
RECEPTOR SIGNALING PROTEIN SERINE THREONINE KINASE ACTIVITY	0.516252	RESPONSE TO VIRUS	0.31073	ENDOSOME TRANSPORT	1.0538e-06	ANION TRANSPORT	1.43267e-07
LATE ENDOSOME	0.517615	SH3 DOMAIN BINDING	0.312411	EPITHELIAL CELL DIFFERENTIATION	1.15759e-06	SMALL GTPASE BINDING	1.48683e-07
STEROID HORMONE RECEPTOR ACTIVITY	0.518557	CERAMIDE METABOLIC PROCESS	0.313542	PHOSPHATASE BINDING	1.50363e-06	VESICLE MEMBRANE	1.53136e-07
ER TO GOLGI VESICLE MEDIATED TRANSPORT	0.519394	NOTCH SIGNALING PATHWAY	0.31549	ENERGY RESERVE METABOLIC PROCESS	1.60953e-06	BIOPOLYMER BIOSYNTHETIC PROCESS	1.53516e-07
POSITIVE REGULATION OF DNA BINDING	0.519394	REGULATION OF ANATOMICAL STRUCTURE MORPHOGENESIS	0.315522	MITOCHONDRIAL LUMEN	1.97401e-06	FOCAL ADHESION FORMATION	1.55756e-07
WOUND HEALING	0.521273	RIBOSOME BIOGENESIS AND ASSEMBLY	0.315522	MITOCHONDRIAL MATRIX	1.97401e-06	ANCHORED TO MEMBRANE	1.5991e-07
ENDOSOME	0.523666	RRNA METABOLIC PROCESS	0.315522	NUCLEOBASENUCLEOSIDENUCLEOTIDE AND NUCLEIC ACID TRANSMEMBRANE TRANSPORTER ACTIVITY	2.08854e-06	ANCHORED TO PLASMA MEMBRANE	1.5991e-07
ORGANELLE LOCALIZATION	0.526612	RRNA PROCESSING	0.315522	N ACETYLTRANSFERASE ACTIVITY	2.16163e-06	PHOSPHOINOSITIDE BINDING	1.61432e-07
INTERLEUKIN RECEPTOR ACTIVITY	0.52672	TRANSCRIPTION INITIATION	0.315974	N ACYLTRANSFERASE ACTIVITY	2.16163e-06	N ACETYLTRANSFERASE ACTIVITY	1.70763e-07
PROGRAMMED CELL DEATH	0.527996	MAP KINASE ACTIVITY	0.318497	CELL FATE COMMITMENT	2.16577e-06	NEGATIVE REGULATION OF BIOSYNTHETIC PROCESS	1.71858e-07
ADENYLATE CYCLASE ACTIVATION	0.529197	DNA FRAGMENTATION DURING APOPTOSIS	0.322637	NEURON APOPTOSIS	2.27757e-06	NEGATIVE REGULATION OF CELLULAR BIOSYNTHETIC PROCESS	1.71858e-07
ESTABLISHMENT OF VESICLE LOCALIZATION	0.529197	NEGATIVE REGULATION OF BINDING	0.324235	NUCLEAR ENVELOPE ENDOPLASMIC RETICULUM NETWORK	2.30793e-06	VITAMIN TRANSPORT	1.75468e-07
TELOMERIC DNA BINDING	0.531916	NEGATIVE REGULATION OF DNA BINDING	0.324235	PEROXISOME ORGANIZATION AND BIOGENESIS	2.54579e-06	ENERGY RESERVE METABOLIC PROCESS	1.82534e-07
GTPASE BINDING	0.533707	CARBOXY LYASE ACTIVITY	0.325187	GLYCEROPHOSPHOLIPID METABOLIC PROCESS	2.63948e-06	SMALL CONJUGATING PROTEIN LIGASE ACTIVITY	1.83513e-07
MITOCHONDRION ORGANIZATION AND BIOGENESIS	0.53557	B CELL ACTIVATION	0.32846	MICROBODY PART	2.71622e-06	SERINE TYPE ENDOPEPTIDASE INHIBITOR ACTIVITY	1.84333e-07
CARBON OXYGEN LYASE ACTIVITY	0.536102	REGULATION OF HOMEOSTATIC PROCESS	0.32846	PEROXISOMAL PART	2.71622e-06	SPLICEOSOME ASSEMBLY	1.84333e-07
I KAPPAB KINASE NF KAPPAB CASCADE	0.536102	NEGATIVE REGULATION OF TRANSCRIPTION FACTOR ACTIVITY	0.329203	REGULATION OF MYELOID CELL DIFFERENTIATION	2.72743e-06	POSITIVE REGULATION OF PROTEIN METABOLIC PROCESS	1.92917e-07
MITOCHONDRIAL LUMEN	0.54507	NUCLEAR ORGANIZATION AND BIOGENESIS	0.330115	PROTEIN METHYLTRANSFERASE ACTIVITY	2.89236e-06	REGULATION OF TRANSPORT	1.98674e-07
MITOCHONDRIAL MATRIX	0.54507	TRANSFERASE ACTIVITY TRANSFERRING HEXOSYL GROUPS	0.33224	CENTROSOME ORGANIZATION AND BIOGENESIS	3.21432e-06	PROTEIN AMINO ACID DEPHOSPHORYLATION	2.01991e-07
PRODUCTION OF MOLECULAR MEDIATOR OF IMMUNE RESPONSE	0.546623	DNA DAMAGE RESPONSESIGNAL TRANSDUCTION RESULTING IN INDUCTION OF APOPTOSIS	0.332536	MICROTUBULE ORGANIZING CENTER ORGANIZATION AND BIOGENESIS	3.21432e-06	PIGMENT BIOSYNTHETIC PROCESS	2.1052e-07
BIOSYNTHETIC PROCESS	0.551066	MRNA METABOLIC PROCESS	0.332611	LIPASE ACTIVITY	3.37511e-06	PIGMENT METABOLIC PROCESS	2.1052e-07
SECRETORY PATHWAY	0.551066	POSITIVE REGULATION OF TRANSCRIPTION FACTOR ACTIVITY	0.333025	PATTERN RECOGNITION RECEPTOR ACTIVITY	3.48203e-06	DNA DIRECTED RNA POLYMERASEII CORE COMPLEX	2.15672e-07
PHOSPHATASE INHIBITOR ACTIVITY	0.562067	POSITIVE REGULATION OF CELLULAR METABOLIC PROCESS	0.336926	COLLAGEN BINDING	3.52603e-06	NEURON APOPTOSIS	2.1639e-07
TRANSITION METAL ION TRANSPORT	0.562067	HYDRO LYASE ACTIVITY	0.339331	REGULATION OF G PROTEIN COUPLED RECEPTOR PROTEIN SIGNALING PATHWAY	3.67771e-06	POSITIVE REGULATION OF CELLULAR PROTEIN METABOLIC PROCESS	2.23522e-07
NUCLEAR ENVELOPE	0.567166	LYMPHOCYTE DIFFERENTIATION	0.34277	CELL RECOGNITION	4.00685e-06	NEGATIVE REGULATION OF GROWTH	2.32523e-07
MACROMOLECULE BIOSYNTHETIC PROCESS	0.569144	LIPID BIOSYNTHETIC PROCESS	0.342874	ACUTE INFLAMMATORY RESPONSE	4.23407e-06	RNA 3END PROCESSING	2.34278e-07
PROTEIN PHOSPHATASE TYPE 2A REGULATOR ACTIVITY	0.569144	MITOCHONDRIAL MEMBRANE	0.353562	NEGATIVE REGULATION OF RESPONSE TO STIMULUS	4.77093e-06	REGULATION OF SIGNAL TRANSDUCTION	2.37346e-07
SPECIFIC TRANSCRIPTIONAL REPRESSOR ACTIVITY	0.574478	PHOSPHATE TRANSMEMBRANE TRANSPORTER ACTIVITY	0.353625	COATED MEMBRANE	5.08926e-06	REGULATION OF I KAPPAB KINASE NF KAPPAB CASCADE	2.37951e-07
EPITHELIAL TO MESENCHYMAL TRANSITION	0.578357	DNA REPLICATION INITIATION	0.35417	COATED VESICLE MEMBRANE	5.08926e-06	TRANSCRIPTION INITIATION	2.57671e-07
REGULATION OF SYNAPSE STRUCTURE AND ACTIVITY	0.579606	N METHYLTRANSFERASE ACTIVITY	0.355693	MEMBRANE COAT	5.08926e-06	CYCLIC NUCLEOTIDE METABOLIC PROCESS	2.73409e-07
RESPONSE TO IONIZING RADIATION	0.583561	MITOCHONDRIAL MEMBRANE PART	0.356326	VESICLE COAT	5.08926e-06	NEUROPEPTIDE HORMONE ACTIVITY	2.79982e-07
SMALL PROTEIN CONJUGATING ENZYME ACTIVITY	0.587398	HEME BIOSYNTHETIC PROCESS	0.357183	MRNA BINDING	5.45985e-06	PROTEIN AMINO ACID LIPIDATION	2.86671e-07
MRNA PROCESSING GO 0006397	0.591425	HEME METABOLIC PROCESS	0.357183	NEGATIVE REGULATION OF GROWTH	5.48489e-06	ACID AMINO ACID LIGASE ACTIVITY	2.88933e-07
DNA FRAGMENTATION DURING APOPTOSIS	0.592248	U12 DEPENDENT SPLICEOSOME	0.357183	PHOSPHORIC DIESTER HYDROLASE ACTIVITY	5.72831e-06	CARBOXYPEPTIDASE ACTIVITY	2.90744e-07
LEUKOCYTE DIFFERENTIATION	0.592248	POSITIVE REGULATION OF BINDING	0.361484	N METHYLTRANSFERASE ACTIVITY	6.77078e-06	PEPTIDE BINDING	3.08538e-07
MICROBODY MEMBRANE	0.599853	ATPASE ACTIVITY COUPLED TO TRANSMEMBRANE MOVEMENT OF IONS	0.361841	ORGANELLE LOCALIZATION	7.29354e-06	CDC42 PROTEIN SIGNAL TRANSDUCTION	3.17888e-07
PEROXISOMAL MEMBRANE	0.599853	POSITIVE REGULATION OF CYTOSKELETON ORGANIZATION AND BIOGENESIS	0.362544	CYTOKINE SECRETION	7.43803e-06	GROWTH	3.22698e-07
NUCLEAR ORGANIZATION AND BIOGENESIS	0.60517	REGULATION OF INTRACELLULAR TRANSPORT	0.362544	REGULATION OF CYTOKINE SECRETION	7.43803e-06	PHOSPHOLIPASE ACTIVITY	3.23659e-07
CELLULAR MACROMOLECULE CATABOLIC PROCESS	0.608086	NUCLEOTIDE METABOLIC PROCESS	0.368074	PHOSPHOLIPASE C ACTIVITY	8.12485e-06	CYTOKINE SECRETION	3.33423e-07
GROWTH	0.612095	POSITIVE REGULATION OF METABOLIC PROCESS	0.369938	SENSORY PERCEPTION OF TASTE	8.44045e-06	REGULATION OF CYTOKINE SECRETION	3.33423e-07
BRUSH BORDER	0.613142	RESPONSE TO TOXIN	0.374277	NEGATIVE REGULATION OF DNA REPLICATION	9.10473e-06	PRODUCTION OF MOLECULAR MEDIATOR OF IMMUNE RESPONSE	3.37168e-07
ORGANELLE MEMBRANE	0.613142	SERINE TYPE ENDOPEPTIDASE INHIBITOR ACTIVITY	0.374277	NF KAPPAB BINDING	9.56551e-06	SOLUTE SODIUM SYMPORTER ACTIVITY	3.37663e-07
APICAL PLASMA MEMBRANE	0.614813	DEPHOSPHORYLATION	0.377242	CALCIUM ION TRANSMEMBRANE TRANSPORTER ACTIVITY	9.79234e-06	BASOLATERAL PLASMA MEMBRANE	3.4953e-07
CYTOKINE PRODUCTION	0.614813	MYELOID LEUKOCYTE DIFFERENTIATION	0.380965	MITOCHONDRIAL RESPIRATORY CHAIN	1.02796e-05	MONOCARBOXYLIC ACID TRANSPORT	3.54115e-07
B CELL ACTIVATION	0.616583	LYSOSOMAL TRANSPORT	0.382192	GROWTH FACTOR BINDING	1.04532e-05	REGULATION OF CELL GROWTH	3.54115e-07
NEGATIVE REGULATION OF BINDING	0.616755	CLATHRIN COATED VESICLE	0.382383	PHOSPHOLIPASE ACTIVITY	1.11614e-05	CELLULAR RESPIRATION	3.57435e-07
NEGATIVE REGULATION OF DNA BINDING	0.616755	RIBOSOME	0.385311	LYSOSOME ORGANIZATION AND BIOGENESIS	1.19294e-05	NICOTINIC ACETYLCHOLINE ACTIVATED CATION SELECTIVE CHANNEL ACTIVITY	3.57435e-07
REGULATION OF GENE SPECIFIC TRANSCRIPTION	0.616755	ENVELOPE	0.386623	REGULATION OF CELL GROWTH	1.30281e-05	NICOTINIC ACETYLCHOLINE GATED RECEPTOR CHANNEL COMPLEX	3.57435e-07
BLOOD COAGULATION	0.617977	ORGANELLE ENVELOPE	0.386623	INDUCTION OF APOPTOSIS BY INTRACELLULAR SIGNALS	1.34533e-05	ENDOSOME TRANSPORT	3.69825e-07
COAGULATION	0.617977	PROTEIN DEACETYLASE ACTIVITY	0.386623	STEROID DEHYDROGENASE ACTIVITY	1.34533e-05	SENSORY PERCEPTION OF CHEMICAL STIMULUS	4.02559e-07
LIPOPROTEIN BIOSYNTHETIC PROCESS	0.617977	CARBOHYDRATE TRANSPORT	0.388973	STEROID DEHYDROGENASE ACTIVITY ACTING ON THE CH OH GROUP OF DONORSNAD OR NADP AS ACCEPTOR	1.34533e-05	NEGATIVE REGULATION OF BINDING	4.13092e-07
NUCLEAR MEMBRANE PART	0.617977	MRNA BINDING	0.389358	HYDROGEN ION TRANSMEMBRANE TRANSPORTER ACTIVITY	1.37782e-05	NEGATIVE REGULATION OF DNA BINDING	4.13092e-07
POSITIVE REGULATION OF SIGNAL TRANSDUCTION	0.619041	MICROTUBULE BINDING	0.392069	FUCOSYLTRANSFERASE ACTIVITY	1.54326e-05	PATTERN RECOGNITION RECEPTOR ACTIVITY	4.38025e-07
NEGATIVE REGULATION OF TRANSCRIPTION FACTOR ACTIVITY	0.619199	EPITHELIAL CELL DIFFERENTIATION	0.398929	PHOSPHOINOSITIDE BIOSYNTHETIC PROCESS	1.58736e-05	LYMPHOCYTE DIFFERENTIATION	4.449e-07
GLUCOSE METABOLIC PROCESS	0.620622	AEROBIC RESPIRATION	0.399381	HYDRO LYASE ACTIVITY	1.65291e-05	GLYCOPROTEIN CATABOLIC PROCESS	4.48059e-07
BETA TUBULIN BINDING	0.623429	LIGASE ACTIVITY	0.400714	MYELOID LEUKOCYTE DIFFERENTIATION	1.76485e-05	HYDROLASE ACTIVITY ACTING ON CARBON NITROGEN NOT PEPTIDEBONDS	4.48883e-07
CELL PROJECTION PART	0.623429	NF KAPPAB BINDING	0.402209	MEDIATOR COMPLEX	1.8292e-05	HISTONE ACETYLTRANSFERASE ACTIVITY	4.54074e-07
INTERLEUKIN 1 SECRETION	0.623642	NEGATIVE REGULATION OF DNA METABOLIC PROCESS	0.406815	PROTEIN POLYUBIQUITINATION	1.96088e-05	POSITIVE REGULATION OF CELLULAR COMPONENT ORGANIZATION AND BIOGENESIS	4.57335e-07
MITOCHONDRIAL RESPIRATORY CHAIN	0.625802	COATED MEMBRANE	0.415616	DI TRI VALENT INORGANIC CATION TRANSMEMBRANE TRANSPORTER ACTIVITY	2.20508e-05	APOPTOTIC MITOCHONDRIAL CHANGES	4.62968e-07
DETECTION OF EXTERNAL STIMULUS	0.628656	MEMBRANE COAT	0.415616	ENDOTHELIAL CELL PROLIFERATION	2.36074e-05	COATED VESICLE MEMBRANE	4.83361e-07
ENDOSOME TRANSPORT	0.629503	VESICLE COAT	0.415616	NEGATIVE REGULATION OF INTRACELLULAR TRANSPORT	2.38199e-05	SECONDARY METABOLIC PROCESS	5.03102e-07
PROTEIN RNA COMPLEX ASSEMBLY	0.629503	FEMALE GAMETE GENERATION	0.419287	LAMELLIPODIUM	2.41623e-05	I KAPPAB KINASE NF KAPPAB CASCADE	5.13407e-07
INOSITOL OR PHOSPHATIDYLINOSITOL PHOSPHODIESTERASE ACTIVITY	0.634116	SPECIFIC TRANSCRIPTIONAL REPRESSOR ACTIVITY	0.42392	GLIOGENESIS	2.49111e-05	INTERFERON GAMMA PRODUCTION	5.27538e-07
RNA 3END PROCESSING	0.634141	CARBON CARBON LYASE ACTIVITY	0.427901	ENDOPLASMIC RETICULUM MEMBRANE	2.50677e-05	MAINTENANCE OF LOCALIZATION	5.39474e-07
TRANSFERASE ACTIVITY TRANSFERRING ACYL GROUPS	0.634141	CYCLASE ACTIVITY	0.427901	TRANSITION METAL ION TRANSPORT	2.50677e-05	MYELOID LEUKOCYTE DIFFERENTIATION	6.60716e-07
ACETYLGLUCOSAMINYLTRANSFERASE ACTIVITY	0.637375	METABOTROPIC GLUTAMATEGABA B LIKE RECEPTOR ACTIVITY	0.427901	MITOCHONDRIAL OUTER MEMBRANE	2.74766e-05	N ACYLTRANSFERASE ACTIVITY	6.72143e-07
TRANSFERASE ACTIVITY TRANSFERRING HEXOSYL GROUPS	0.637736	PHOSPHORUS OXYGEN LYASE ACTIVITY	0.427901	NUCLEOLAR PART	2.97494e-05	EXTRACELLULAR STRUCTURE ORGANIZATION AND BIOGENESIS	6.881e-07
BODY FLUID SECRETION	0.638017	MICROTUBULE POLYMERIZATION OR DEPOLYMERIZATION	0.428456	HEPARIN BINDING	3.11739e-05	NEGATIVE REGULATION OF RESPONSE TO STIMULUS	6.90892e-07
LIGAND DEPENDENT NUCLEAR RECEPTOR ACTIVITY	0.638017	MAINTENANCE OF PROTEIN LOCALIZATION	0.430657	INTERFERON GAMMA BIOSYNTHETIC PROCESS	3.44612e-05	REGULATION OF ANGIOGENESIS	7.10654e-07
NUCLEOBASENUCLEOSIDE AND NUCLEOTIDE METABOLIC PROCESS	0.639181	RESPONSE TO IONIZING RADIATION	0.430657	CYTOPLASMIC VESICLE MEMBRANE	3.46561e-05	INTEGRIN BINDING	7.38367e-07
RESPONSE TO RADIATION	0.640202	MITOCHONDRIAL ENVELOPE	0.430978	CYTOPLASMIC VESICLE PART	3.46561e-05	ACTIVATION OF NF KAPPAB TRANSCRIPTION FACTOR	8.03349e-07
TRANSLATIONAL INITIATION	0.640652	CYTOKINE BIOSYNTHETIC PROCESS	0.431255	TRANS GOLGI NETWORK TRANSPORT VESICLE	3.7389e-05	RESPONSE TO BIOTIC STIMULUS	8.20179e-07
CELLULAR BIOSYNTHETIC PROCESS	0.642263	CYTOKINE METABOLIC PROCESS	0.431255	PHOSPHOLIPID METABOLIC PROCESS	3.74955e-05	INTERCALATED DISC	8.20985e-07
SPHINGOLIPID METABOLIC PROCESS	0.642308	EXCRETION	0.431992	POSITIVE REGULATION OF CASPASE ACTIVITY	3.78254e-05	TRANSCRIPTION INITIATION FROM RNA POLYMERASE II PROMOTER	8.2895e-07
ENDOTHELIAL CELL PROLIFERATION	0.643638	NEGATIVE REGULATION OF ANGIOGENESIS	0.443769	SIGNAL SEQUENCE BINDING	3.80021e-05	TRANSCRIPTION ELONGATION REGULATOR ACTIVITY	8.42139e-07
FUCOSYLTRANSFERASE ACTIVITY	0.643638	MEMBRANE LIPID METABOLIC PROCESS	0.446317	CARBON OXYGEN LYASE ACTIVITY	3.80094e-05	TRANSMEMBRANE RECEPTOR PROTEIN PHOSPHATASE ACTIVITY	8.52467e-07
POSITIVE REGULATION OF PROTEIN METABOLIC PROCESS	0.643638	REGULATION OF CELL MIGRATION	0.447231	RNA POLYMERASE ACTIVITY	4.10444e-05	KINESIN COMPLEX	8.57611e-07
REGULATION OF ANGIOGENESIS	0.643638	SMALL GTPASE BINDING	0.447231	INTRACELLULAR RECEPTOR MEDIATED SIGNALING PATHWAY	4.20978e-05	DETECTION OF STIMULUS INVOLVED IN SENSORY PERCEPTION	8.75628e-07
RESPONSE TO OXIDATIVE STRESS	0.643638	TRANSITION METAL ION TRANSPORT	0.447269	STEROID HORMONE RECEPTOR SIGNALING PATHWAY	4.20978e-05	MONOVALENT INORGANIC CATION TRANSMEMBRANE TRANSPORTER ACTIVITY	8.84121e-07
SPHINGOID METABOLIC PROCESS	0.64426	TUBULIN BINDING	0.447269	CYTOCHROME C OXIDASE ACTIVITY	4.71303e-05	CASPASE REGULATOR ACTIVITY	8.87532e-07
TRANSFERASE ACTIVITY TRANSFERRING GROUPS OTHER THAN AMINO ACYL GROUPS	0.64561	MONOCARBOXYLIC ACID TRANSMEMBRANE TRANSPORTER ACTIVITY	0.449322	AEROBIC RESPIRATION	4.7242e-05	COATED MEMBRANE	9.21406e-07
MICROBODY	0.647647	ENDOCYTIC VESICLE	0.456049	CELLULAR RESPIRATION	4.7242e-05	MEMBRANE COAT	9.21406e-07
PEROXISOME	0.647647	NEGATIVE REGULATION OF CELL ADHESION	0.456141	GLUTAMINE FAMILY AMINO ACID METABOLIC PROCESS	4.79076e-05	VESICLE COAT	9.21406e-07
MESODERM DEVELOPMENT	0.653613	TRANSFERASE ACTIVITY TRANSFERRING ONE CARBON GROUPS	0.460674	PHOSPHOLIPASE A2 ACTIVITY	4.92939e-05	EPITHELIAL CELL DIFFERENTIATION	9.4787e-07
NEGATIVE REGULATION OF DNA METABOLIC PROCESS	0.653613	CARBON OXYGEN LYASE ACTIVITY	0.462637	POSITIVE REGULATION OF CYTOKINE PRODUCTION	5.13651e-05	PHOSPHOLIPASE A2 ACTIVITY	9.69717e-07
CYTOCHROME C OXIDASE ACTIVITY	0.657056	SOLUTE SODIUM SYMPORTER ACTIVITY	0.464823	CYTOKINE AND CHEMOKINE MEDIATED SIGNALING PATHWAY	5.46653e-05	DEACETYLASE ACTIVITY	1.05834e-06
MACROMOLECULAR COMPLEX ASSEMBLY	0.657967	POSITIVE REGULATION OF PROTEIN MODIFICATION PROCESS	0.465309	DETECTION OF STIMULUS	5.70043e-05	CYTOKINE BINDING	1.10879e-06
INTERPHASE	0.658401	RNA SPLICING	0.467508	NEGATIVE REGULATION OF CELL ADHESION	5.71716e-05	ENDOTHELIAL CELL PROLIFERATION	1.18063e-06
POSITIVE REGULATION OF ANGIOGENESIS	0.658401	PML BODY	0.467646	HYDROLASE ACTIVITY HYDROLYZING N GLYCOSYL COMPOUNDS	6.1926e-05	MULTI ORGANISM PROCESS	1.19991e-06
CYTOPLASMIC VESICLE MEMBRANE	0.658426	RESPONSE TO TEMPERATURE STIMULUS	0.469553	PML BODY	6.75089e-05	POSITIVE REGULATION OF CASPASE ACTIVITY	1.2841e-06
CYTOPLASMIC VESICLE PART	0.658426	GLYCEROPHOSPHOLIPID BIOSYNTHETIC PROCESS	0.470889	MORPHOGENESIS OF AN EPITHELIUM	6.85323e-05	PHOSPHORIC DIESTER HYDROLASE ACTIVITY	1.39526e-06
SPLICEOSOME ASSEMBLY	0.658554	LIPOPROTEIN METABOLIC PROCESS	0.471484	U12 DEPENDENT SPLICEOSOME	7.24657e-05	AXON GUIDANCE	1.4409e-06
UBIQUITIN PROTEIN LIGASE ACTIVITY	0.66083	PROTEIN METHYLTRANSFERASE ACTIVITY	0.473719	POSITIVE REGULATION OF TRANSLATION	7.47805e-05	MORPHOGENESIS OF AN EPITHELIUM	1.50713e-06
UNFOLDED PROTEIN RESPONSE	0.662919	CELL FATE COMMITMENT	0.473827	POSITIVE REGULATION OF EPITHELIAL CELL PROLIFERATION	7.47857e-05	NEGATIVE REGULATION OF TRANSCRIPTION FACTOR ACTIVITY	1.52178e-06
DETECTION OF STIMULUS	0.664886	REGIONALIZATION	0.473833	PHOTOTRANSDUCTION	7.55113e-05	RIBOSOMAL SUBUNIT	1.64635e-06
DOUBLE STRANDED RNA BINDING	0.664886	SMALL CONJUGATING PROTEIN LIGASE ACTIVITY	0.473833	SECONDARY METABOLIC PROCESS	8.99118e-05	AMYLOID PRECURSOR PROTEIN METABOLIC PROCESS	1.9579e-06
PROTON TRANSPORTING TWO SECTOR ATPASE COMPLEX	0.664886	NEGATIVE REGULATION OF DNA REPLICATION	0.47984	POSITIVE REGULATION OF CELL DIFFERENTIATION	9.64114e-05	FEMALE GAMETE GENERATION	1.98836e-06
PROTEIN METHYLTRANSFERASE ACTIVITY	0.664908	SPHINGOLIPID METABOLIC PROCESS	0.47984	NEGATIVE REGULATION OF CYTOKINE BIOSYNTHETIC PROCESS	9.9025e-05	ENDOTHELIAL CELL MIGRATION	2.0397e-06
POSITIVE REGULATION OF CELL DIFFERENTIATION	0.668415	STRESS ACTIVATED PROTEIN KINASE SIGNALING PATHWAY	0.47984	INTEGRIN BINDING	0.000113274	ESTABLISHMENT OF VESICLE LOCALIZATION	2.15271e-06
T CELL DIFFERENTIATION	0.6686	VESICLE LOCALIZATION	0.479992	METABOTROPIC GLUTAMATEGABA B LIKE RECEPTOR ACTIVITY	0.000136531	NUCLEOBASENUCLEOSIDE AND NUCLEOTIDE METABOLIC PROCESS	2.15343e-06
CYTOSOL	0.669016	CHROMATIN MODIFICATION	0.489876	CARBONATE DEHYDRATASE ACTIVITY	0.000139306	CELL SUBSTRATE ADHERENS JUNCTION	2.20188e-06
TRANSLATION FACTOR ACTIVITY NUCLEIC ACID BINDING	0.670969	SITE OF POLARIZED GROWTH	0.494661	ANTIGEN BINDING	0.000148504	SUPEROXIDE METABOLIC PROCESS	2.48007e-06
REGULATED SECRETORY PATHWAY	0.672111	METHYLTRANSFERASE ACTIVITY	0.495165	MONOSACCHARIDE BINDING	0.000151549	N TERMINAL PROTEIN AMINO ACID MODIFICATION	2.52889e-06
CARBOXY LYASE ACTIVITY	0.672626	DETECTION OF ABIOTIC STIMULUS	0.4956	MITOCHONDRIAL RIBOSOME	0.000163246	REGULATION OF DNA BINDING	2.54192e-06
MITOCHONDRIAL MEMBRANE	0.672626	REGULATION OF DNA REPLICATION	0.503987	ORGANELLAR RIBOSOME	0.000163246	REGULATION OF CELL MORPHOGENESIS	2.54232e-06
MITOCHONDRIAL MEMBRANE PART	0.672626	PROTON TRANSPORTING TWO SECTOR ATPASE COMPLEX	0.5079	ATPASE ACTIVITY COUPLED TO TRANSMEMBRANE MOVEMENT OF IONS PHOSPHORYLATIVE MECHANISM	0.000169009	REGULATION OF CELL SHAPE	2.54232e-06
NUCLEAR PORE	0.673456	POSITIVE REGULATION OF TRANSCRIPTIONDNA DEPENDENT	0.514623	SH3 DOMAIN BINDING	0.000171168	GENERAL RNA POLYMERASE II TRANSCRIPTION FACTOR ACTIVITY	2.70711e-06
CELL MATRIX JUNCTION	0.677763	PROTEIN IMPORT	0.516675	PRODUCTION OF MOLECULAR MEDIATOR OF IMMUNE RESPONSE	0.000182627	ACETYLGALACTOSAMINYLTRANSFERASE ACTIVITY	2.802e-06
DNA REPAIR	0.678687	RESPONSE TO HEAT	0.518667	POSITIVE REGULATION OF CYTOSKELETON ORGANIZATION AND BIOGENESIS	0.000189155	SULFUR COMPOUND BIOSYNTHETIC PROCESS	2.82357e-06
NEGATIVE REGULATION OF GROWTH	0.679324	PROTEIN PHOSPHATASE BINDING	0.519439	MEMBRANE LIPID BIOSYNTHETIC PROCESS	0.000194438	CELLULAR PROTEIN COMPLEX DISASSEMBLY	2.88293e-06
SYNAPSE PART	0.679324	S PHASE	0.521902	GLYCEROPHOSPHOLIPID BIOSYNTHETIC PROCESS	0.00019935	MACROMOLECULAR COMPLEX DISASSEMBLY	2.88293e-06
DETECTION OF ABIOTIC STIMULUS	0.682862	STEROID HORMONE RECEPTOR ACTIVITY	0.521902	MICROTUBULE POLYMERIZATION OR DEPOLYMERIZATION	0.000210346	PROTEIN COMPLEX DISASSEMBLY	2.88293e-06
LEUKOCYTE CHEMOTAXIS	0.685353	EPITHELIAL TO MESENCHYMAL TRANSITION	0.524835	CELLULAR PROTEIN COMPLEX ASSEMBLY	0.000247218	MICROTUBULE POLYMERIZATION OR DEPOLYMERIZATION	3.06486e-06
TRANSLATION	0.685353	ANCHORED TO MEMBRANE	0.527153	DETECTION OF STIMULUS INVOLVED IN SENSORY PERCEPTION	0.0002719	NEGATIVE REGULATION OF TRANSPORT	3.16453e-06
INTRACELLULAR PROTEIN TRANSPORT	0.685783	ANCHORED TO PLASMA MEMBRANE	0.527153	RESPONSE TO STEROID HORMONE STIMULUS	0.000275781	MAINTENANCE OF CELLULAR LOCALIZATION	3.19937e-06
POSITIVE REGULATION OF CELLULAR PROTEIN METABOLIC PROCESS	0.685783	GROWTH	0.530414	POSITIVE REGULATION OF ANGIOGENESIS	0.000284995	MAINTENANCE OF CELLULAR PROTEIN LOCALIZATION	3.19937e-06
NEGATIVE REGULATION OF CELL DIFFERENTIATION	0.686445	GROWTH FACTOR BINDING	0.530414	MICROBODY MEMBRANE	0.000315409	COLLAGEN BINDING	3.43031e-06
REGULATION OF PROTEIN AMINO ACID PHOSPHORYLATION	0.687432	MITOCHONDRIAL RESPIRATORY CHAIN	0.53076	PEROXISOMAL MEMBRANE	0.000315409	G PROTEIN SIGNALING ADENYLATE CYCLASE INHIBITING PATHWAY	3.46362e-06
APOPTOSIS GO	0.689098	BASOLATERAL PLASMA MEMBRANE	0.530837	POSITIVE REGULATION OF DNA METABOLIC PROCESS	0.000351337	ESTABLISHMENT AND OR MAINTENANCE OF CELL POLARITY	3.49103e-06
CELLULAR COMPONENT ASSEMBLY	0.689098	POSITIVE REGULATION OF CYTOKINE SECRETION	0.530837	DETECTION OF EXTERNAL STIMULUS	0.000356296	STRIATED MUSCLE CONTRACTION GO 0006941	3.54947e-06
MEIOSIS I	0.689098	RESPONSE TO ABIOTIC STIMULUS	0.530837	INTRINSIC TO GOLGI MEMBRANE	0.000379482	NEGATIVE REGULATION OF HYDROLASE ACTIVITY	3.61317e-06
NUCLEAR IMPORT	0.689098	SPERM MOTILITY	0.530837	RESPONSE TO OTHER ORGANISM	0.000384632	NEGATIVE REGULATION OF DNA REPLICATION	3.75867e-06
PROTEIN IMPORT INTO NUCLEUS	0.689098	POSITIVE REGULATION OF TRANSCRIPTION	0.535483	DNA REPLICATION INITIATION	0.000453379	PROTEIN DEACETYLASE ACTIVITY	3.90284e-06
SH3 DOMAIN BINDING	0.689098	TRIACYLGLYCEROL METABOLIC PROCESS	0.538012	EXONUCLEASE ACTIVITY	0.000455096	REGULATION OF RESPONSE TO EXTERNAL STIMULUS	3.91334e-06
INTEGRAL TO GOLGI MEMBRANE	0.691974	TUBE DEVELOPMENT	0.538012	INTERLEUKIN BINDING	0.000508309	DNA MODIFICATION	4.11513e-06
NEGATIVE REGULATION OF TRANSPORT	0.694708	UNFOLDED PROTEIN BINDING	0.538012	SUPEROXIDE METABOLIC PROCESS	0.000518394	INTERLEUKIN 2 PRODUCTION	4.33605e-06
CELL STRUCTURE DISASSEMBLY DURING APOPTOSIS	0.695026	NUCLEAR IMPORT	0.542103	INTEGRATOR COMPLEX	0.000554801	B CELL DIFFERENTIATION	4.53451e-06
PROTEIN TRANSPORT	0.696382	PROTEIN IMPORT INTO NUCLEUS	0.542103	PHOSPHOINOSITIDE METABOLIC PROCESS	0.000611231	MYELOID CELL DIFFERENTIATION	4.56245e-06
RESPONSE TO HYPOXIA	0.698368	MITOCHONDRIAL PART	0.544087	LIPID HOMEOSTASIS	0.00061908	PROTEIN TRANSPORTER ACTIVITY	4.77115e-06
ADAPTIVE IMMUNE RESPONSE GO 0002460	0.703963	POLYSACCHARIDE METABOLIC PROCESS	0.544087	REGULATION OF NEURON APOPTOSIS	0.000629402	PHOTOTRANSDUCTION	5.16975e-06
REGULATION OF TRANSCRIPTION FACTOR ACTIVITY	0.703963	LIPOPROTEIN BIOSYNTHETIC PROCESS	0.545215	NEURON PROJECTION	0.00070391	CERAMIDE METABOLIC PROCESS	6.16278e-06
BIOPOLYMER BIOSYNTHETIC PROCESS	0.70551	INDUCTION OF APOPTOSIS BY INTRACELLULAR SIGNALS	0.545344	B CELL ACTIVATION	0.000726105	CASPASE ACTIVATION	6.24186e-06
HISTONE METHYLTRANSFERASE ACTIVITY	0.706528	CELL STRUCTURE DISASSEMBLY DURING APOPTOSIS	0.546011	CYCLIC NUCLEOTIDE METABOLIC PROCESS	0.000731568	MITOCHONDRIAL RESPIRATORY CHAIN	6.68643e-06
REGULATION OF MAP KINASE ACTIVITY	0.708736	INTRINSIC TO ORGANELLE MEMBRANE	0.548465	POSITIVE REGULATION OF PEPTIDYL TYROSINE PHOSPHORYLATION	0.000776037	POLYSACCHARIDE METABOLIC PROCESS	6.83616e-06
DEACETYLASE ACTIVITY	0.712694	MAINTENANCE OF CELLULAR LOCALIZATION	0.550438	REGULATION OF PEPTIDYL TYROSINE PHOSPHORYLATION	0.000776037	PHOSPHOINOSITIDE BIOSYNTHETIC PROCESS	6.94505e-06
REGULATION OF CELLULAR PROTEIN METABOLIC PROCESS	0.713418	MAINTENANCE OF CELLULAR PROTEIN LOCALIZATION	0.550438	PHOSPHOLIPID BIOSYNTHETIC PROCESS	0.000806639	NLS BEARING SUBSTRATE IMPORT INTO NUCLEUS	7.00147e-06
VESICLE MEMBRANE	0.713418	CARBOXYPEPTIDASE ACTIVITY	0.555727	ENDONUCLEASE ACTIVITY GO 0016893	0.00081399	BODY FLUID SECRETION	7.61725e-06
CHROMATIN MODIFICATION	0.714357	SPHINGOLIPID BIOSYNTHETIC PROCESS	0.558495	CASPASE REGULATOR ACTIVITY	0.000823832	RNA SPLICING	8.16819e-06
MICROTUBULE BASED MOVEMENT	0.715131	MITOCHONDRIAL INNER MEMBRANE	0.561322	REGULATION OF INTRACELLULAR TRANSPORT	0.00084848	NEGATIVE REGULATION OF CELL MIGRATION	8.37775e-06
MRNA BINDING	0.722289	ORGANELLE INNER MEMBRANE	0.561322	TISSUE MORPHOGENESIS	0.00084848	HEMATOPOIETIN INTERFERON CLASSD200 DOMAIN CYTOKINE RECEPTOR ACTIVITY	8.74223e-06
MICROTUBULE BINDING	0.722396	POSITIVE REGULATION OF NUCLEOBASENUCLEOSIDENUCLEOTIDE AND NUCLEIC ACID METABOLIC PROCESS	0.56348	PROTEIN TRANSPORTER ACTIVITY	0.000854676	POSITIVE REGULATION OF I KAPPAB KINASE NF KAPPAB CASCADE	1.11158e-05
CLATHRIN COATED VESICLE	0.724263	OLIGOSACCHARIDE METABOLIC PROCESS	0.563697	REGULATION OF NUCLEOCYTOPLASMIC TRANSPORT	0.000904897	NEGATIVE REGULATION OF ANGIOGENESIS	1.17104e-05
REGULATION OF I KAPPAB KINASE NF KAPPAB CASCADE	0.724263	INTERACTION WITH HOST	0.563815	MONOCARBOXYLIC ACID TRANSMEMBRANE TRANSPORTER ACTIVITY	0.000999975	S ADENOSYLMETHIONINE DEPENDENT METHYLTRANSFERASE ACTIVITY	1.1773e-05
EPITHELIAL CELL DIFFERENTIATION	0.724702	SPHINGOID METABOLIC PROCESS	0.56523	APOPTOTIC MITOCHONDRIAL CHANGES	0.0010414	NEGATIVE REGULATION OF INTRACELLULAR TRANSPORT	1.21867e-05
NUCLEAR ENVELOPE ENDOPLASMIC RETICULUM NETWORK	0.724702	PHOSPHORIC DIESTER HYDROLASE ACTIVITY	0.565443	DEFENSE RESPONSE TO BACTERIUM	0.00107125	OVULATION CYCLE	1.28414e-05
CELLULAR RESPIRATION	0.727917	REGULATION OF NEURON APOPTOSIS	0.566971	STEROID HORMONE RECEPTOR ACTIVITY	0.00112795	SENSORY PERCEPTION OF TASTE	1.29044e-05
ACTIVATION OF NF KAPPAB TRANSCRIPTION FACTOR	0.729701	CYTOKINE BINDING	0.567193	CARBOHYDRATE TRANSMEMBRANE TRANSPORTER ACTIVITY	0.00124998	PHOSPHOLIPID TRANSPORTER ACTIVITY	1.3101e-05
ACETYLTRANSFERASE ACTIVITY	0.733798	REGULATION OF MAPKKK CASCADE	0.569077	HISTONE DEACETYLASE COMPLEX	0.00126818	PROTEIN EXPORT FROM NUCLEUS	1.35363e-05
ENDOPLASMIC RETICULUM PART	0.734564	COVALENT CHROMATIN MODIFICATION	0.573394	NEGATIVE REGULATION OF DNA METABOLIC PROCESS	0.00134845	REGULATION OF MAPKKK CASCADE	1.35682e-05
ENDOTHELIAL CELL MIGRATION	0.734564	ANDROGEN RECEPTOR SIGNALING PATHWAY	0.573472	MAP KINASE KINASE KINASE ACTIVITY	0.0019456	VESICLE LOCALIZATION	1.36392e-05
CYSTEINE TYPE ENDOPEPTIDASE ACTIVITY	0.739703	VACUOLAR TRANSPORT	0.574094	SMALL NUCLEAR RIBONUCLEOPROTEIN COMPLEX	0.0019456	T CELL DIFFERENTIATION	1.37075e-05
ESTABLISHMENT AND OR MAINTENANCE OF CELL POLARITY	0.739703	REGULATION OF CYTOKINE BIOSYNTHETIC PROCESS	0.579211	RESPONSE TO BACTERIUM	0.00238194	INTERFERON GAMMA BIOSYNTHETIC PROCESS	1.52076e-05
CHROMATIN BINDING	0.742221	NUCLEAR MATRIX	0.580543	RESPONSE TO TEMPERATURE STIMULUS	0.00252536	COLLAGEN	1.5285e-05
BASOLATERAL PLASMA MEMBRANE	0.744555	ADAPTIVE IMMUNE RESPONSE	0.581861	MAINTENANCE OF CELLULAR LOCALIZATION	0.00254108	PROTEIN MATURATION	1.54388e-05
CELL PROJECTION BIOGENESIS	0.745143	RNA BINDING	0.583235	MAINTENANCE OF CELLULAR PROTEIN LOCALIZATION	0.00254108	SPLICEOSOME	1.56247e-05
POSITIVE REGULATION OF CELLULAR METABOLIC PROCESS	0.747063	CELL PROJECTION BIOGENESIS	0.586679	VACUOLAR TRANSPORT	0.00262861	UNFOLDED PROTEIN RESPONSE	1.66523e-05
PEPTIDYL AMINO ACID MODIFICATION	0.748906	DETECTION OF EXTERNAL STIMULUS	0.586679	STRIATED MUSCLE CONTRACTION GO 0006941	0.00265314	IMMUNOLOGICAL SYNAPSE	1.70666e-05
SITE OF POLARIZED GROWTH	0.748906	PATTERN RECOGNITION RECEPTOR ACTIVITY	0.586679	SULFUR COMPOUND BIOSYNTHETIC PROCESS	0.00265702	REGULATION OF SYNAPSE STRUCTURE AND ACTIVITY	1.7133e-05
TRANSMEMBRANE RECEPTOR PROTEIN SERINE THREONINE KINASE SIGNALING PATHWAY	0.748906	TRANSCRIPTION FACTOR TFIID COMPLEX	0.586679	MONOSACCHARIDE TRANSMEMBRANE TRANSPORTER ACTIVITY	0.00268646	NUCLEOTIDE METABOLIC PROCESS	1.81398e-05
REGULATION OF LIPID METABOLIC PROCESS	0.74996	COATED VESICLE	0.587073	SUGAR TRANSMEMBRANE TRANSPORTER ACTIVITY	0.00268646	POSITIVE REGULATION OF SIGNAL TRANSDUCTION	1.82188e-05
CARBOHYDRATE TRANSPORT	0.750175	POSITIVE REGULATION OF TRANSLATION	0.587073	ACTIN FILAMENT POLYMERIZATION	0.0028681	REGULATION OF G PROTEIN COUPLED RECEPTOR PROTEIN SIGNALING PATHWAY	2.26815e-05
EMBRYO IMPLANTATION	0.750175	REGULATION OF CELL MORPHOGENESIS	0.587073	VESICLE MEMBRANE	0.00307289	MEMBRANE LIPID METABOLIC PROCESS	2.33146e-05
NEUROTRANSMITTER SECRETION	0.750175	REGULATION OF CELL SHAPE	0.587073	DETECTION OF ABIOTIC STIMULUS	0.00319077	INORGANIC ANION TRANSPORT	2.40865e-05
PROTEIN IMPORT INTO NUCLEUS TRANSLOCATION	0.750175	VESICLE MEMBRANE	0.587073	POSITIVE REGULATION OF CYTOKINE BIOSYNTHETIC PROCESS	0.00342626	HYDROGEN ION TRANSMEMBRANE TRANSPORTER ACTIVITY	2.43323e-05
RESPONSE TO VIRUS	0.750175	BIOPOLYMER BIOSYNTHETIC PROCESS	0.587106	RESPONSE TO IONIZING RADIATION	0.00342794	DETECTION OF EXTERNAL STIMULUS	2.65904e-05
ANCHORED TO MEMBRANE	0.751425	PHOSPHOINOSITIDE METABOLIC PROCESS	0.587106	POSITIVE REGULATION OF JNK ACTIVITY	0.00353056	INORGANIC CATION TRANSMEMBRANE TRANSPORTER ACTIVITY	2.96823e-05
ANCHORED TO PLASMA MEMBRANE	0.751425	POSITIVE REGULATION OF RNA METABOLIC PROCESS	0.588224	REGULATION OF JNK ACTIVITY	0.00353056	METABOTROPIC GLUTAMATEGABA B LIKE RECEPTOR ACTIVITY	3.00835e-05
POSITIVE REGULATION OF PEPTIDYL TYROSINE PHOSPHORYLATION	0.757172	ACETYLTRANSFERASE ACTIVITY	0.588246	NEGATIVE REGULATION OF SECRETION	0.00354242	PROTEIN SERINE THREONINE PHOSPHATASE COMPLEX	3.09322e-05
APICAL PART OF CELL	0.758236	PHOSPHOLIPID BIOSYNTHETIC PROCESS	0.589857	AGING	0.00360489	LIPID TRANSPORTER ACTIVITY	3.41235e-05
LIPID BIOSYNTHETIC PROCESS	0.758236	POSITIVE REGULATION OF CATALYTIC ACTIVITY	0.59342	SPHINGOLIPID BIOSYNTHETIC PROCESS	0.00370894	GLYCEROPHOSPHOLIPID METABOLIC PROCESS	3.53435e-05
SPECIFIC RNA POLYMERASE II TRANSCRIPTION FACTOR ACTIVITY	0.758903	PYRIMIDINE NUCLEOTIDE METABOLIC PROCESS	0.594555	CASPASE ACTIVATION	0.00377536	RNA PROCESSING	3.99e-05
TRANSFERASE ACTIVITY TRANSFERRING GLYCOSYL GROUPS	0.764859	CYTOSKELETON DEPENDENT INTRACELLULAR TRANSPORT	0.594741	ACTIN FILAMENT BASED MOVEMENT	0.00381156	REGULATION OF MYELOID CELL DIFFERENTIATION	4.28361e-05
TRANSLATION REGULATOR ACTIVITY	0.765453	EXTRACELLULAR STRUCTURE ORGANIZATION AND BIOGENESIS	0.59846	PIGMENT BIOSYNTHETIC PROCESS	0.00495357	TRANSITION METAL ION TRANSPORT	4.34617e-05
NEGATIVE REGULATION OF DNA REPLICATION	0.765985	HEMATOPOIETIN INTERFERON CLASSD200 DOMAIN CYTOKINE RECEPTOR ACTIVITY	0.602048	PIGMENT METABOLIC PROCESS	0.00495357	REGULATION OF RAS PROTEIN SIGNAL TRANSDUCTION	4.38211e-05
PROTEIN EXPORT FROM NUCLEUS	0.767292	DEACETYLASE ACTIVITY	0.603795	TRNA PROCESSING	0.00622571	REGULATION OF RHO PROTEIN SIGNAL TRANSDUCTION	4.38211e-05
NUCLEAR MATRIX	0.773798	JNK CASCADE	0.603822	NEGATIVE REGULATION OF CELL DIFFERENTIATION	0.00638381	REGULATION OF BINDING	4.53782e-05
NUCLEAR MEMBRANE	0.776321	PROTEIN KINASE CASCADE	0.608712	VITAMIN BINDING	0.00761158	SPHINGOID METABOLIC PROCESS	4.66696e-05
VIRAL REPRODUCTION	0.777165	REGULATION OF G PROTEIN COUPLED RECEPTOR PROTEIN SIGNALING PATHWAY	0.61174	REGULATION OF PROTEIN IMPORT INTO NUCLEUS	0.00824555	ER TO GOLGI VESICLE MEDIATED TRANSPORT	4.80812e-05
HYDRO LYASE ACTIVITY	0.779837	CELLULAR PROTEIN COMPLEX DISASSEMBLY	0.612175	NUCLEOTIDE SUGAR METABOLIC PROCESS	0.00918038	ISOPRENOID METABOLIC PROCESS	5.06077e-05
NEGATIVE REGULATION OF MAP KINASE ACTIVITY	0.782309	MACROMOLECULAR COMPLEX DISASSEMBLY	0.612175	SENSORY ORGAN DEVELOPMENT	0.00937983	REGULATION OF CYTOKINE BIOSYNTHETIC PROCESS	5.10231e-05
POSITIVE REGULATION OF METABOLIC PROCESS	0.783002	PROTEIN COMPLEX DISASSEMBLY	0.612175	REGULATION OF JAK STAT CASCADE	0.00940264	SH3 DOMAIN BINDING	5.36431e-05
STEROID DEHYDROGENASE ACTIVITY	0.783002	HISTONE DEACETYLASE COMPLEX	0.612354	REGULATION OF TYROSINE PHOSPHORYLATION OF STAT PROTEIN	0.00940264	TRNA PROCESSING	5.67414e-05
ATP DEPENDENT DNA HELICASE ACTIVITY	0.783274	MICROTUBULE ORGANIZING CENTER ORGANIZATION AND BIOGENESIS	0.612416	TYROSINE PHOSPHORYLATION OF STAT PROTEIN	0.00940264	GROWTH FACTOR BINDING	6.04436e-05
EXTERNAL SIDE OF PLASMA MEMBRANE	0.788528	CARBOHYDRATE CATABOLIC PROCESS	0.614463	LEUKOCYTE DIFFERENTIATION	0.0102669	NEGATIVE REGULATION OF CELL DIFFERENTIATION	6.25605e-05
NUCLEOTIDE EXCISION REPAIR	0.792323	CELLULAR CARBOHYDRATE CATABOLIC PROCESS	0.614463	PYRIMIDINE NUCLEOTIDE METABOLIC PROCESS	0.0103981	DETECTION OF STIMULUS	6.5794e-05
RNA CATABOLIC PROCESS	0.792811	NEGATIVE REGULATION OF TRANSPORT	0.614463	BODY FLUID SECRETION	0.0107965	LEUKOCYTE CHEMOTAXIS	6.68365e-05
TRANSFORMING GROWTH FACTOR BETA RECEPTOR SIGNALING PATHWAY	0.792811	ER TO GOLGI VESICLE MEDIATED TRANSPORT	0.615174	LYMPHOCYTE DIFFERENTIATION	0.0110787	PHOSPHATASE INHIBITOR ACTIVITY	7.14541e-05
ANTIGEN BINDING	0.795235	FATTY ACID BETA OXIDATION	0.615808	PHOSPHATE TRANSMEMBRANE TRANSPORTER ACTIVITY	0.0119989	LEUKOCYTE MIGRATION	8.11672e-05
EXCRETION	0.795235	POSITIVE REGULATION OF I KAPPAB KINASE NF KAPPAB CASCADE	0.61901	MAP KINASE ACTIVITY	0.0123357	POSITIVE REGULATION OF TRANSLATION	8.40449e-05
REGULATION OF DNA REPLICATION	0.795235	NEGATIVE REGULATION OF CELL DIFFERENTIATION	0.623588	PHOSPHOTRANSFERASE ACTIVITY PHOSPHATE GROUP AS ACCEPTOR	0.0128479	MEMBRANE LIPID BIOSYNTHETIC PROCESS	8.46812e-05
REGULATION OF MOLECULAR FUNCTION	0.795235	NEGATIVE REGULATION OF INTRACELLULAR TRANSPORT	0.625754	ORGANIC ANION TRANSMEMBRANE TRANSPORTER ACTIVITY	0.0143005	PROTEIN IMPORT INTO NUCLEUS TRANSLOCATION	9.29006e-05
REGULATION OF CELL GROWTH	0.799444	MESODERM DEVELOPMENT	0.627522	INTERLEUKIN RECEPTOR ACTIVITY	0.0164243	HISTONE DEACETYLASE COMPLEX	9.46146e-05
CARBONATE DEHYDRATASE ACTIVITY	0.799852	POSITIVE REGULATION OF DNA BINDING	0.632477	RESPONSE TO HEAT	0.0187838	CELL PROJECTION BIOGENESIS	0.000100084
PEROXISOME ORGANIZATION AND BIOGENESIS	0.803999	G2 M TRANSITION OF MITOTIC CELL CYCLE	0.635769	LEUKOCYTE MIGRATION	0.0187992	PROTEIN SERINE THREONINE TYROSINE KINASE ACTIVITY	0.000100993
IMMUNOLOGICAL SYNAPSE	0.804345	NEGATIVE REGULATION OF CELL MIGRATION	0.635826	CELL PROJECTION BIOGENESIS	0.0197279	REGULATION OF PEPTIDYL TYROSINE PHOSPHORYLATION	0.000103354
PROTEIN KINASE CASCADE	0.804345	CYCLIC NUCLEOTIDE METABOLIC PROCESS	0.636309	CATION TRANSPORTING ATPASE ACTIVITY	0.022797	INTERLEUKIN BINDING	0.000112648
REGULATION OF RESPONSE TO EXTERNAL STIMULUS	0.804345	NUCLEOTIDE BIOSYNTHETIC PROCESS	0.642616	ENERGY DERIVATION BY OXIDATION OF ORGANIC COMPOUNDS	0.0228947	GLAND DEVELOPMENT	0.000115714
VACUOLAR TRANSPORT	0.804345	POSITIVE REGULATION OF PROTEIN SECRETION	0.644921	NUCLEOBASENUCLEOSIDENUCLEOTIDE KINASE ACTIVITY	0.0240489	RNA POLYMERASE ACTIVITY	0.000117105
POSITIVE REGULATION OF BINDING	0.804473	CYTOPLASMIC VESICLE MEMBRANE	0.646985	DNA DAMAGE RESPONSESIGNAL TRANSDUCTION RESULTING IN INDUCTION OF APOPTOSIS	0.0251972	RESPONSE TO TOXIN	0.000122926
EXTRACELLULAR STRUCTURE ORGANIZATION AND BIOGENESIS	0.804646	CYTOPLASMIC VESICLE PART	0.646985	DETECTION OF BIOTIC STIMULUS	0.0268618	SUGAR TRANSMEMBRANE TRANSPORTER ACTIVITY	0.000134042
ADHERENS JUNCTION	0.807894	INTEGRAL TO ORGANELLE MEMBRANE	0.64822	GOLGI STACK	0.0276851	GLYCEROPHOSPHOLIPID BIOSYNTHETIC PROCESS	0.000137385
ENDOPLASMIC RETICULUM MEMBRANE	0.807894	MITOCHONDRIAL LUMEN	0.648502	ESTABLISHMENT OF VESICLE LOCALIZATION	0.0277096	MONOSACCHARIDE BINDING	0.000141469
LYSOSOMAL TRANSPORT	0.808239	MITOCHONDRIAL MATRIX	0.648502	VESICLE LOCALIZATION	0.0277096	POSITIVE REGULATION OF PROTEIN SECRETION	0.000150256
MAPKKK CASCADE GO 0000165	0.811505	MONOSACCHARIDE TRANSMEMBRANE TRANSPORTER ACTIVITY	0.649564	RNA 3END PROCESSING	0.0325836	PHOSPHATE TRANSMEMBRANE TRANSPORTER ACTIVITY	0.000153214
SYNAPTOGENESIS	0.814148	PHOSPHOTRANSFERASE ACTIVITY PHOSPHATE GROUP AS ACCEPTOR	0.650014	NEGATIVE REGULATION OF IMMUNE SYSTEM PROCESS	0.0329025	NUCLEOSOME ASSEMBLY	0.000156722
HOMEOSTASIS OF NUMBER OF CELLS	0.821311	ACID AMINO ACID LIGASE ACTIVITY	0.653874	INORGANIC ANION TRANSPORT	0.033356	RNA ELONGATION	0.000161954
INTERPHASE OF MITOTIC CELL CYCLE	0.822568	PHOSPHOLIPASE A2 ACTIVITY	0.657676	INTEGRAL TO ENDOPLASMIC RETICULUM MEMBRANE	0.0364918	INSULIN LIKE GROWTH FACTOR RECEPTOR BINDING	0.000163703
DEOXYRIBONUCLEASE ACTIVITY	0.823303	CELL MATRIX ADHESION	0.658311	INTRINSIC TO ENDOPLASMIC RETICULUM MEMBRANE	0.0364918	REGULATION OF INTRACELLULAR TRANSPORT	0.000163781
REGIONALIZATION	0.825352	MAPKKK CASCADE GO 0000165	0.660665	REGULATION OF JNK CASCADE	0.0364918	PHOSPHOLIPID METABOLIC PROCESS	0.000171356
SOLUTE SODIUM SYMPORTER ACTIVITY	0.826618	REGULATION OF MYELOID CELL DIFFERENTIATION	0.66499	CYCLIC NUCLEOTIDE PHOSPHODIESTERASE ACTIVITY	0.0368374	PROTEIN PHOSPHATASE TYPE 2A REGULATOR ACTIVITY	0.000175919
BIOPOLYMER CATABOLIC PROCESS	0.831159	CDC42 PROTEIN SIGNAL TRANSDUCTION	0.666304	NEGATIVE REGULATION OF MYELOID CELL DIFFERENTIATION	0.0458255	NEGATIVE REGULATION OF PHOSPHATE METABOLIC PROCESS	0.000183087
COATED VESICLE MEMBRANE	0.831159	INOSITOL OR PHOSPHATIDYLINOSITOL PHOSPHODIESTERASE ACTIVITY	0.67187	UNFOLDED PROTEIN RESPONSE	0.0480958	NEGATIVE REGULATION OF PHOSPHORYLATION	0.000183087
NUCLEOTIDYLTRANSFERASE ACTIVITY	0.831159	NEURON APOPTOSIS	0.67187	ACTIVATION OF IMMUNE RESPONSE	0.0522098	RESPONSE TO IONIZING RADIATION	0.000184775
PHOSPHOLIPID TRANSPORTER ACTIVITY	0.831159	APOPTOTIC MITOCHONDRIAL CHANGES	0.67377	HISTONE METHYLTRANSFERASE ACTIVITY	0.0536156	S PHASE	0.000186569
SMALL CONJUGATING PROTEIN LIGASE ACTIVITY	0.832097	LEUKOCYTE DIFFERENTIATION	0.675389	PROTEIN IMPORT INTO NUCLEUS TRANSLOCATION	0.059267	REGULATION OF JAK STAT CASCADE	0.000197746
REGULATION OF TRANSLATION	0.833132	BODY FLUID SECRETION	0.676542	CELLULAR POLYSACCHARIDE METABOLIC PROCESS	0.0643005	REGULATION OF TYROSINE PHOSPHORYLATION OF STAT PROTEIN	0.000197746
RHYTHMIC PROCESS	0.838539	INORGANIC CATION TRANSMEMBRANE TRANSPORTER ACTIVITY	0.680818	SULFURIC ESTER HYDROLASE ACTIVITY	0.0719079	TYROSINE PHOSPHORYLATION OF STAT PROTEIN	0.000197746
POSITIVE REGULATION OF CELL MIGRATION	0.838555	REGULATION OF CELL GROWTH	0.680818	VITAMIN TRANSPORT	0.0721201	SMALL NUCLEAR RIBONUCLEOPROTEIN COMPLEX	0.000212828
INTRINSIC TO GOLGI MEMBRANE	0.841761	ENERGY RESERVE METABOLIC PROCESS	0.683987	HETEROGENEOUS NUCLEAR RIBONUCLEOPROTEIN COMPLEX	0.0740784	RESPONSE TO OTHER ORGANISM	0.000216058
COATED VESICLE	0.84348	DETECTION OF BIOTIC STIMULUS	0.690043	OLIGOSACCHARIDE METABOLIC PROCESS	0.074233	PHOSPHOINOSITIDE METABOLIC PROCESS	0.000218974
CARBON CARBON LYASE ACTIVITY	0.845578	SIGNAL SEQUENCE BINDING	0.697641	MITOTIC SISTER CHROMATID SEGREGATION	0.0774961	PROTEIN UBIQUITINATION	0.00021917
INACTIVATION OF MAPK ACTIVITY	0.846425	PROTEIN AMINO ACID LIPIDATION	0.699079	SISTER CHROMATID SEGREGATION	0.0774961	SPHINGOLIPID BIOSYNTHETIC PROCESS	0.000223751
MICROTUBULE ORGANIZING CENTER ORGANIZATION AND BIOGENESIS	0.847615	CENTROSOME ORGANIZATION AND BIOGENESIS	0.699788	RESPONSE TO TOXIN	0.0955777	SULFURIC ESTER HYDROLASE ACTIVITY	0.000238662
SIALYLTRANSFERASE ACTIVITY	0.849392	ACTIN FILAMENT POLYMERIZATION	0.700065	LEUKOCYTE CHEMOTAXIS	0.101176	PROTEIN TARGETING TO MEMBRANE	0.000263504
MITOCHONDRIAL ENVELOPE	0.849478	POSITIVE REGULATION OF CASPASE ACTIVITY	0.700065	TRANSITION METAL ION TRANSMEMBRANE TRANSPORTER ACTIVITY	0.105152	DNA REPLICATION INITIATION	0.000269048
NEGATIVE REGULATION OF TRANSFERASE ACTIVITY	0.849478	REGULATION OF SIGNAL TRANSDUCTION	0.700065	TRANSCRIPTION FROM RNA POLYMERASE III PROMOTER	0.117215	PHOSPHOLIPID BIOSYNTHETIC PROCESS	0.000308281
MITOCHONDRIAL PART	0.849831	SMAD BINDING	0.700065	MONOCARBOXYLIC ACID TRANSPORT	0.12215	HISTONE METHYLTRANSFERASE ACTIVITY	0.000320092
POSITIVE REGULATION OF TRANSCRIPTIONDNA DEPENDENT	0.849831	LIGASE ACTIVITY FORMING CARBON NITROGEN BONDS	0.700576	INTEGRAL TO GOLGI MEMBRANE	0.124666	POSITIVE REGULATION OF PEPTIDYL TYROSINE PHOSPHORYLATION	0.000336391
PROTEIN COMPLEX ASSEMBLY	0.85243	RAS GTPASE BINDING	0.704996	T CELL DIFFERENTIATION	0.171434	CARBOHYDRATE TRANSMEMBRANE TRANSPORTER ACTIVITY	0.000351795
PROTEIN PHOSPHATASE BINDING	0.855365	SYNAPTIC VESICLE	0.705448	PROTEIN TARGETING TO MEMBRANE	0.18455	SITE OF POLARIZED GROWTH	0.000357531
FOCAL ADHESION	0.859888	MICROTUBULE BASED MOVEMENT	0.707411	GLUCAN METABOLIC PROCESS	0.228272	DRUG BINDING	0.000385797
GTP BINDING	0.859888	GLAND DEVELOPMENT	0.710357	HEME BIOSYNTHETIC PROCESS	0.228272	TUBE MORPHOGENESIS	0.000404627
GUANYL NUCLEOTIDE BINDING	0.859888	BRUSH BORDER	0.717473	HEME METABOLIC PROCESS	0.228272	GOLGI STACK	0.000427836
LIPOPROTEIN METABOLIC PROCESS	0.866884	HISTONE MODIFICATION	0.721306	S PHASE OF MITOTIC CELL CYCLE	0.234936	REGULATION OF SMALL GTPASE MEDIATED SIGNAL TRANSDUCTION	0.000465668
DNA CATABOLIC PROCESS	0.868835	REGULATION OF ENDOTHELIAL CELL PROLIFERATION	0.721306	RNA ELONGATION	0.317817	REGULATION OF PROTEIN IMPORT INTO NUCLEUS	0.000503368
POSITIVE REGULATION OF TRANSCRIPTION FACTOR ACTIVITY	0.868835	I KAPPAB KINASE NF KAPPAB CASCADE	0.727121	INTERLEUKIN 1 SECRETION	0.326903	CELL FATE COMMITMENT	0.000510403
RNA SPLICING	0.869946	CASPASE REGULATOR ACTIVITY	0.72883	POSITIVE REGULATION OF CYTOKINE SECRETION	0.326903	SIGNAL SEQUENCE BINDING	0.000511345
ANDROGEN RECEPTOR SIGNALING PATHWAY	0.870284	HISTONE METHYLTRANSFERASE ACTIVITY	0.737834	POSITIVE REGULATION OF PROTEIN SECRETION	0.326903	INWARD RECTIFIER POTASSIUM CHANNEL ACTIVITY	0.000527103
MACROMOLECULE CATABOLIC PROCESS	0.870284	RESPONSE TO OXIDATIVE STRESS	0.738975	PROTEIN TARGETING TO MITOCHONDRION	0.373154	PHOSPHOTRANSFERASE ACTIVITY PHOSPHATE GROUP AS ACCEPTOR	0.000538395
COLLAGEN BINDING	0.87615	S PHASE OF MITOTIC CELL CYCLE	0.738975	NUCLEOTIDE KINASE ACTIVITY	0.375394	REGULATION OF ENDOCYTOSIS	0.00054642
CYTOKINE BIOSYNTHETIC PROCESS	0.881244	OXIDOREDUCTASE ACTIVITY ACTING ON THE CH CH GROUP OF DONORS	0.739615	CELLULAR RESPONSE TO EXTRACELLULAR STIMULUS	0.384038	ATPASE ACTIVITY COUPLED TO TRANSMEMBRANE MOVEMENT OF IONS	0.000555436
CYTOKINE METABOLIC PROCESS	0.881244	DNA MODIFICATION	0.744269	CELLULAR RESPONSE TO NUTRIENT LEVELS	0.384038	ATPASE ACTIVITY COUPLED TO TRANSMEMBRANE MOVEMENT OF IONS PHOSPHORYLATIVE MECHANISM	0.000555436
NLS BEARING SUBSTRATE IMPORT INTO NUCLEUS	0.881436	TISSUE MORPHOGENESIS	0.744486	CELLULAR RESPONSE TO STRESS	0.384038	MITOCHONDRIAL LUMEN	0.000728316
DNA DIRECTED RNA POLYMERASE COMPLEX	0.881781	INTEGRAL TO ENDOPLASMIC RETICULUM MEMBRANE	0.745765	CELL SOMA	0.414766	MITOCHONDRIAL MATRIX	0.000728316
INDUCTION OF APOPTOSIS BY INTRACELLULAR SIGNALS	0.881781	INTRINSIC TO ENDOPLASMIC RETICULUM MEMBRANE	0.745765	NEGATIVE REGULATION OF PHOSPHATE METABOLIC PROCESS	0.414766	DETECTION OF ABIOTIC STIMULUS	0.000728429
NUCLEAR DNA DIRECTED RNA POLYMERASE COMPLEX	0.881781	SMALL CONJUGATING PROTEIN BINDING	0.749948	NEGATIVE REGULATION OF PHOSPHORYLATION	0.414766	CELLULAR POLYSACCHARIDE METABOLIC PROCESS	0.000767865
RNA POLYMERASE COMPLEX	0.881781	UBIQUITIN BINDING	0.749948	MESODERM DEVELOPMENT	0.423684	TISSUE MORPHOGENESIS	0.00078431
VITAMIN BINDING	0.881781	REGULATION OF JAK STAT CASCADE	0.756469	NUCLEAR MATRIX	0.466819	ENERGY DERIVATION BY OXIDATION OF ORGANIC COMPOUNDS	0.000795847
MYELOID CELL DIFFERENTIATION	0.886337	REGULATION OF TYROSINE PHOSPHORYLATION OF STAT PROTEIN	0.756469	TRIACYLGLYCEROL METABOLIC PROCESS	0.4889	MITOCHONDRIAL RESPIRATORY CHAIN COMPLEX I	0.000820853
INORGANIC ANION TRANSPORT	0.887827	TYROSINE PHOSPHORYLATION OF STAT PROTEIN	0.756469	S PHASE	0.509519	NADH DEHYDROGENASE COMPLEX	0.000820853
MONOCARBOXYLIC ACID TRANSPORT	0.887827	CARBOHYDRATE TRANSMEMBRANE TRANSPORTER ACTIVITY	0.759527	ARYLSULFATASE ACTIVITY	0.561216	RESPIRATORY CHAIN COMPLEX I	0.000820853
UNFOLDED PROTEIN BINDING	0.887827	SUGAR TRANSMEMBRANE TRANSPORTER ACTIVITY	0.772992	RIBONUCLEOTIDE METABOLIC PROCESS	0.564515	REGULATION OF NUCLEOCYTOPLASMIC TRANSPORT	0.000863018
ATPASE ACTIVITY COUPLED TO MOVEMENT OF SUBSTANCES	0.888891	MEMBRANE LIPID BIOSYNTHETIC PROCESS	0.774362	DRUG BINDING	0.579884	GLUCAN METABOLIC PROCESS	0.000877448
HYDROLASE ACTIVITY ACTING ON ACID ANHYDRIDESCATALYZING TRANSMEMBRANE MOVEMENT OF SUBSTANCES	0.888891	PHOSPHOINOSITIDE BIOSYNTHETIC PROCESS	0.77501	DELAYED RECTIFIER POTASSIUM CHANNEL ACTIVITY	0.586177	SEROTONIN RECEPTOR ACTIVITY	0.00103871
PRIMARY ACTIVE TRANSMEMBRANE TRANSPORTER ACTIVITY	0.888891	SPLICEOSOME	0.776092	REGULATION OF INTERFERON GAMMA BIOSYNTHETIC PROCESS	0.604111	HEME BIOSYNTHETIC PROCESS	0.00111944
TISSUE MORPHOGENESIS	0.889175	RNA PROCESSING	0.779845	PURINE NUCLEOTIDE METABOLIC PROCESS	0.615078	HEME METABOLIC PROCESS	0.00111944
HEMATOPOIETIN INTERFERON CLASSD200 DOMAIN CYTOKINE RECEPTOR ACTIVITY	0.890241	NUCLEOBASENUCLEOSIDENUCLEOTIDE KINASE ACTIVITY	0.780611	PURINE RIBONUCLEOTIDE METABOLIC PROCESS	0.615078	N METHYLTRANSFERASE ACTIVITY	0.00123334
POSITIVE REGULATION OF TRANSCRIPTION	0.890241	DENDRITE	0.786179	B CELL DIFFERENTIATION	0.631307	FUCOSYLTRANSFERASE ACTIVITY	0.00124785
FATTY ACID BETA OXIDATION	0.891262	COATED VESICLE MEMBRANE	0.792265	SMOOTH MUSCLE CONTRACTION GO 0006939	0.664911	S PHASE OF MITOTIC CELL CYCLE	0.00124785
DETECTION OF BIOTIC STIMULUS	0.893812	PHOSPHATASE REGULATOR ACTIVITY	0.793052	CHROMOSOME CONDENSATION	0.678174	CALCIUM ION TRANSMEMBRANE TRANSPORTER ACTIVITY	0.00139405
HYDROLASE ACTIVITY ACTING ON CARBON NITROGEN NOT PEPTIDEBONDS	0.894684	N ACYLTRANSFERASE ACTIVITY	0.793185	MITOCHONDRIAL RESPIRATORY CHAIN COMPLEX I	0.70677	CYTOCHROME C OXIDASE ACTIVITY	0.00167159
MRNA METABOLIC PROCESS	0.895664	LIPASE ACTIVITY	0.793532	NADH DEHYDROGENASE COMPLEX	0.70677	MONOSACCHARIDE TRANSMEMBRANE TRANSPORTER ACTIVITY	0.0020058
LIGASE ACTIVITY	0.895969	ACETYLGALACTOSAMINYLTRANSFERASE ACTIVITY	0.795209	RESPIRATORY CHAIN COMPLEX I	0.70677	DELAYED RECTIFIER POTASSIUM CHANNEL ACTIVITY	0.00219162
THYROID HORMONE RECEPTOR BINDING	0.895969	GOLGI STACK	0.800301	BIOPOLYMER BIOSYNTHETIC PROCESS	0.745595	INTEGRATOR COMPLEX	0.0022419
MITOCHONDRIAL INNER MEMBRANE	0.89692	STRIATED MUSCLE CONTRACTION GO 0006941	0.800301	LYSOSOMAL TRANSPORT	0.781336	PURINE RIBONUCLEOTIDE METABOLIC PROCESS	0.00224649
PHOSPHOLIPID BINDING	0.899447	HYDROGEN ION TRANSMEMBRANE TRANSPORTER ACTIVITY	0.802495	ANDROGEN RECEPTOR SIGNALING PATHWAY	0.96303	ACTIN FILAMENT POLYMERIZATION	0.00235153
ACID AMINO ACID LIGASE ACTIVITY	0.899589	EUKARYOTIC TRANSLATION INITIATION FACTOR 3 COMPLEX	0.805356	RNA POLYMERASE II TRANSCRIPTION MEDIATOR ACTIVITY	0.96303	CELLULAR PROTEIN COMPLEX ASSEMBLY	0.0023833
DNA DAMAGE RESPONSESIGNAL TRANSDUCTION BY P53 CLASS MEDIATOR	0.899589	PROTEIN AMINO ACID DEPHOSPHORYLATION	0.805812			DETECTION OF BIOTIC STIMULUS	0.00257446
ISOPRENOID METABOLIC PROCESS	0.899589	POSITIVE REGULATION OF PROTEIN METABOLIC PROCESS	0.808116			PYRIMIDINE NUCLEOTIDE METABOLIC PROCESS	0.00264827
OXIDOREDUCTASE ACTIVITY ACTING ON THE CH CH GROUP OF DONORS	0.89992	MAINTENANCE OF LOCALIZATION	0.811201			DEFENSE RESPONSE TO BACTERIUM	0.00267076
REGULATION OF MITOTIC CELL CYCLE	0.900866	FUCOSYLTRANSFERASE ACTIVITY	0.812687			DNA DAMAGE RESPONSESIGNAL TRANSDUCTION RESULTING IN INDUCTION OF APOPTOSIS	0.00295275
NUCLEOTIDE BIOSYNTHETIC PROCESS	0.901638	RNA POLYMERASE ACTIVITY	0.813085			GLIOGENESIS	0.00345105
NF KAPPAB BINDING	0.905238	POSITIVE REGULATION OF CELLULAR PROTEIN METABOLIC PROCESS	0.814374			REGULATION OF JNK CASCADE	0.00401194
CELL SUBSTRATE ADHESION	0.906678	POSITIVE REGULATION OF PEPTIDYL TYROSINE PHOSPHORYLATION	0.814986			PURINE NUCLEOTIDE METABOLIC PROCESS	0.00486005
HYDROLASE ACTIVITY HYDROLYZING N GLYCOSYL COMPOUNDS	0.906678	SECONDARY METABOLIC PROCESS	0.814986			SYNAPSE ORGANIZATION AND BIOGENESIS	0.00510411
TUBE DEVELOPMENT	0.9118	TRNA PROCESSING	0.816414			REGULATION OF INTERFERON GAMMA BIOSYNTHETIC PROCESS	0.00533865
POSITIVE REGULATION OF NUCLEOBASENUCLEOSIDENUCLEOTIDE AND NUCLEIC ACID METABOLIC PROCESS	0.912432	ENDONUCLEASE ACTIVITY GO 0016893	0.81664			ACTIN FILAMENT BASED MOVEMENT	0.00570471
POSITIVE REGULATION OF RNA METABOLIC PROCESS	0.912432	INORGANIC ANION TRANSPORT	0.819741			RIBONUCLEOTIDE METABOLIC PROCESS	0.00615197
REGULATION OF TRANSFORMING GROWTH FACTOR BETA RECEPTOR SIGNALING PATHWAY	0.914438	PROTEIN TARGETING TO MEMBRANE	0.819741			PROTEIN POLYUBIQUITINATION	0.00746969
VOLTAGE GATED POTASSIUM CHANNEL COMPLEX	0.917487	REGULATION OF BINDING	0.819741			MESODERM DEVELOPMENT	0.0083943
RNA SPLICING FACTOR ACTIVITYTRANSESTERIFICATION MECHANISM	0.917923	TRANSCRIPTION FROM RNA POLYMERASE III PROMOTER	0.819741			INTRACELLULAR RECEPTOR MEDIATED SIGNALING PATHWAY	0.0084832
B CELL DIFFERENTIATION	0.918828	ESTABLISHMENT OF VESICLE LOCALIZATION	0.821626			STEROID HORMONE RECEPTOR SIGNALING PATHWAY	0.0084832
CDC42 PROTEIN SIGNAL TRANSDUCTION	0.923254	ADAPTIVE IMMUNE RESPONSE GO 0002460	0.823986			REGULATION OF ENDOTHELIAL CELL PROLIFERATION	0.00905101
REGULATION OF TYROSINE PHOSPHORYLATION OF STAT PROTEIN	0.923254	ENDOTHELIAL CELL PROLIFERATION	0.825739			ORGANIC ANION TRANSMEMBRANE TRANSPORTER ACTIVITY	0.0102681
TYROSINE PHOSPHORYLATION OF STAT PROTEIN	0.923254	MONOVALENT INORGANIC CATION TRANSMEMBRANE TRANSPORTER ACTIVITY	0.82581			POSITIVE REGULATION OF CYTOSKELETON ORGANIZATION AND BIOGENESIS	0.0107172
HETEROPHILIC CELL ADHESION	0.924635	N ACETYLTRANSFERASE ACTIVITY	0.828043			NUCLEOTIDE KINASE ACTIVITY	0.0130523
LEUKOCYTE MIGRATION	0.924635	RESPONSE TO BIOTIC STIMULUS	0.828043			MEDIATOR COMPLEX	0.0152549
OLIGOSACCHARIDE METABOLIC PROCESS	0.924635	EXTERNAL SIDE OF PLASMA MEMBRANE	0.837886			MITOCHONDRIAL RIBOSOME	0.018668
JNK CASCADE	0.927479	GTPASE BINDING	0.837886			ORGANELLAR RIBOSOME	0.018668
EMBRYONIC MORPHOGENESIS	0.928061	PROTEIN MATURATION	0.837886			RIBOSOME BIOGENESIS AND ASSEMBLY	0.0187725
OXIDOREDUCTASE ACTIVITY ACTING ON PEROXIDE AS ACCEPTOR	0.928462	RNA POLYMERASE II TRANSCRIPTION MEDIATOR ACTIVITY	0.837886			RRNA METABOLIC PROCESS	0.0187725
G2 M TRANSITION OF MITOTIC CELL CYCLE	0.929907	ENDOSOME TRANSPORT	0.84022			RRNA PROCESSING	0.0187725
S ADENOSYLMETHIONINE DEPENDENT METHYLTRANSFERASE ACTIVITY	0.931156	PROTEIN PHOSPHATASE TYPE 2A REGULATOR ACTIVITY	0.8411			INTERLEUKIN RECEPTOR ACTIVITY	0.0248777
PHOSPHOLIPASE C ACTIVATION	0.931925	MONOCARBOXYLIC ACID TRANSPORT	0.841714			POSITIVE REGULATION OF CYTOKINE BIOSYNTHETIC PROCESS	0.0262663
ORGANELLE INNER MEMBRANE	0.933038	REGULATION OF I KAPPAB KINASE NF KAPPAB CASCADE	0.842886			TRIACYLGLYCEROL METABOLIC PROCESS	0.0309339
POLYSACCHARIDE METABOLIC PROCESS	0.933709	POSITIVE REGULATION OF SIGNAL TRANSDUCTION	0.84372			RESPONSE TO BACTERIUM	0.0381278
REGULATION OF ANATOMICAL STRUCTURE MORPHOGENESIS	0.940268	RNA ELONGATION	0.847764			OLIGOSACCHARIDE METABOLIC PROCESS	0.041774
DENDRITE	0.94277	REGULATION OF CELL DIFFERENTIATION	0.849658			ARYLSULFATASE ACTIVITY	0.0433271
REGULATION OF CELL DIFFERENTIATION	0.943042	ESTABLISHMENT AND OR MAINTENANCE OF CELL POLARITY	0.854069			LYSOSOMAL TRANSPORT	0.0447084
SULFURIC ESTER HYDROLASE ACTIVITY	0.945113	DELAYED RECTIFIER POTASSIUM CHANNEL ACTIVITY	0.855115			DI TRI VALENT INORGANIC CATION TRANSMEMBRANE TRANSPORTER ACTIVITY	0.0476266
PORE COMPLEX	0.946459	PROTEIN AMINO ACID ADP RIBOSYLATION	0.857722			NEGATIVE REGULATION OF IMMUNE SYSTEM PROCESS	0.0647535
ENDONUCLEASE ACTIVITY	0.953026	PRODUCTION OF MOLECULAR MEDIATOR OF IMMUNE RESPONSE	0.858609			MAP KINASE ACTIVITY	0.0680381
LIGASE ACTIVITY FORMING CARBON NITROGEN BONDS	0.953026	ADENYLATE CYCLASE ACTIVATION	0.859378			INTERLEUKIN 8 BIOSYNTHETIC PROCESS	0.0762115
REGULATION OF CELL MIGRATION	0.955445	CELLULAR RESPIRATION	0.860088			INTERLEUKIN 8 PRODUCTION	0.0762115
ENDODEOXYRIBONUCLEASE ACTIVITY	0.955742	REGULATION OF DNA BINDING	0.87259			CATION TRANSPORTING ATPASE ACTIVITY	0.0862595
STRESS ACTIVATED PROTEIN KINASE SIGNALING PATHWAY	0.955742	SYNAPTOGENESIS	0.872887			VACUOLAR TRANSPORT	0.0866361
ATP DEPENDENT RNA HELICASE ACTIVITY	0.962165	RNA 3END PROCESSING	0.875552			NUCLEAR MATRIX	0.0906918
RNA DEPENDENT ATPASE ACTIVITY	0.962165	REGULATION OF ANGIOGENESIS	0.882088			PHOSPHATASE BINDING	0.095285
MEMBRANE FUSION	0.962732	MULTI ORGANISM PROCESS	0.883065			PROTEIN PHOSPHATASE BINDING	0.127885
PHOSPHOLIPASE ACTIVITY	0.962732	CARBONATE DEHYDRATASE ACTIVITY	0.883554			SYNAPTOGENESIS	0.159553
POSITIVE REGULATION OF DNA METABOLIC PROCESS	0.962732	GLYCEROPHOSPHOLIPID METABOLIC PROCESS	0.896146			RAS GUANYL NUCLEOTIDE EXCHANGE FACTOR ACTIVITY	0.172375
SPHINGOLIPID BIOSYNTHETIC PROCESS	0.962732	INTEGRIN BINDING	0.896905			TRANSCRIPTION FACTOR TFIID COMPLEX	0.178314
DEPHOSPHORYLATION	0.965203	PHOSPHOLIPASE ACTIVITY	0.902065			POSITIVE REGULATION OF ANGIOGENESIS	0.188484
PROTEIN DEACETYLASE ACTIVITY	0.968973	REGULATION OF PEPTIDYL TYROSINE PHOSPHORYLATION	0.903956			NEGATIVE REGULATION OF MYELOID CELL DIFFERENTIATION	0.223547
POSITIVE REGULATION OF CATALYTIC ACTIVITY	0.970141	HETEROGENEOUS NUCLEAR RIBONUCLEOPROTEIN COMPLEX	0.907378			POSITIVE REGULATION OF DNA METABOLIC PROCESS	0.262693
CIRCADIAN RHYTHM	0.975062	S ADENOSYLMETHIONINE DEPENDENT METHYLTRANSFERASE ACTIVITY	0.927429			INTERLEUKIN 1 SECRETION	0.281127
REGULATION OF PROTEIN METABOLIC PROCESS	0.975062	TRANSCRIPTION ELONGATION REGULATOR ACTIVITY	0.932097			POSITIVE REGULATION OF CYTOKINE SECRETION	0.281127
GALACTOSYLTRANSFERASE ACTIVITY	0.975773	MORPHOGENESIS OF AN EPITHELIUM	0.940432			EARLY ENDOSOME	0.306356
REGULATION OF PEPTIDYL TYROSINE PHOSPHORYLATION	0.97772	BONE REMODELING	0.942724			TRANSITION METAL ION TRANSMEMBRANE TRANSPORTER ACTIVITY	0.434806
RESPONSE TO ABIOTIC STIMULUS	0.97772	CELLULAR COMPONENT DISASSEMBLY	0.944938			PROTEIN TARGETING TO MITOCHONDRION	0.445306
ENVELOPE	0.977922	PIGMENT BIOSYNTHETIC PROCESS	0.953			CYCLIC NUCLEOTIDE PHOSPHODIESTERASE ACTIVITY	0.470113
ORGANELLE ENVELOPE	0.977922	PIGMENT METABOLIC PROCESS	0.953			NEGATIVE REGULATION OF CYTOKINE BIOSYNTHETIC PROCESS	0.49566
GUANYL NUCLEOTIDE EXCHANGE FACTOR ACTIVITY	0.981925	POSITIVE REGULATION OF CELLULAR COMPONENT ORGANIZATION AND BIOGENESIS	0.953			CHROMATIN REMODELING COMPLEX	0.566176
GOLGI ASSOCIATED VESICLE	0.985235	HYDROLASE ACTIVITY HYDROLYZING N GLYCOSYL COMPOUNDS	0.959672			MICROVILLUS	0.575477
REGULATION OF DNA METABOLIC PROCESS	0.985235	CYTOCHROME C OXIDASE ACTIVITY	0.961265			RNA POLYMERASE II TRANSCRIPTION MEDIATOR ACTIVITY	0.704054
DELAYED RECTIFIER POTASSIUM CHANNEL ACTIVITY	0.986082	MEMBRANE FUSION	0.963959			ANDROGEN RECEPTOR SIGNALING PATHWAY	0.788308
APOPTOTIC PROGRAM	0.987002	CASPASE ACTIVATION	0.976174			SMOOTH MUSCLE CONTRACTION GO 0006939	0.90281
NEGATIVE REGULATION OF CELL MIGRATION	0.994067	PHOSPHATASE INHIBITOR ACTIVITY	0.976596			STEROID HORMONE RECEPTOR ACTIVITY	0.936477
REGULATION OF TRANSLATIONAL INITIATION	0.996514	ENDOTHELIAL CELL MIGRATION	0.977386			CELL SOMA	0.966947
VOLTAGE GATED SODIUM CHANNEL ACTIVITY	0.998935	INTERFERON GAMMA BIOSYNTHETIC PROCESS	0.995634			DEVELOPMENTAL GROWTH	0.969003
LYMPHOCYTE DIFFERENTIATION	0.999137	SYNAPSE ORGANIZATION AND BIOGENESIS	0.999245
POSITIVE REGULATION OF PROTEIN MODIFICATION PROCESS	0.999137	NUCLEOBASENUCLEOSIDE AND NUCLEOTIDE METABOLIC PROCESS	1
RIBONUCLEOPROTEIN COMPLEX BIOGENESIS AND ASSEMBLY	1

## Sheet: Table S3
Table S3. Complete canonical pathways and p values.
stage I	p value	stage II	p value	stage III	p value	stage IV	p value
REACTOME CD28 DEPENDENT PI3K AKT SIGNALING	7.92636e-11	BIOCARTA AKAP13 PATHWAY	1.69915e-13	PID AR TF PATHWAY	7.56355e-46	KEGG GLYCOSPHINGOLIPID BIOSYNTHESIS GANGLIO SERIES	7.77503e-31
BIOCARTA AKAP13 PATHWAY	1.35446e-09	REACTOME CD28 DEPENDENT PI3K AKT SIGNALING	9.29168e-12	KEGG GLYCOSPHINGOLIPID BIOSYNTHESIS GANGLIO SERIES	5.83506e-42	BIOCARTA AKAP13 PATHWAY	1.89248e-30
KEGG ASCORBATE AND ALDARATE METABOLISM	1.37006e-09	REACTOME PI3K EVENTS IN ERBB4 SIGNALING	1.87381e-09	BIOCARTA CK1 PATHWAY	1.87135e-40	PID AR TF PATHWAY	4.86915e-29
KEGG GLYCOSPHINGOLIPID BIOSYNTHESIS GANGLIO SERIES	1.43236e-09	KEGG ASCORBATE AND ALDARATE METABOLISM	2.8949e-09	REACTOME COPI MEDIATED TRANSPORT	3.58506e-40	REACTOME CD28 DEPENDENT PI3K AKT SIGNALING	5.24563e-28
REACTOME SIGNALING BY NOTCH3	4.67806e-09	REACTOME GPVI MEDIATED ACTIVATION CASCADE	2.8949e-09	REACTOME G0 AND EARLY G1	1.84821e-39	REACTOME GPVI MEDIATED ACTIVATION CASCADE	2.66066e-25
REACTOME PACKAGING OF TELOMERE ENDS	2.5935e-08	BIOCARTA MTA3 PATHWAY	4.86029e-09	REACTOME SPHINGOLIPID DE NOVO BIOSYNTHESIS	9.09089e-39	REACTOME HORMONE SENSITIVE LIPASE HSL MEDIATED TRIACYLGLYCEROL HYDROLYSIS	2.66066e-25
REACTOME MEIOTIC SYNAPSIS	5.27475e-08	REACTOME GAB1 SIGNALOSOME	4.86029e-09	KEGG CELL CYCLE	1.37997e-38	REACTOME TERMINATION OF O GLYCAN BIOSYNTHESIS	6.26484e-25
KEGG RETINOL METABOLISM	3.15052e-07	REACTOME PI3K AKT ACTIVATION	5.11832e-09	REACTOME DARPP 32 EVENTS	3.38709e-38	KEGG ALDOSTERONE REGULATED SODIUM REABSORPTION	6.35137e-25
REACTOME APOPTOTIC CLEAVAGE OF CELL ADHESION PROTEINS	3.59842e-07	REACTOME POST CHAPERONIN TUBULIN FOLDING PATHWAY	8.86982e-09	REACTOME MEIOTIC SYNAPSIS	6.68652e-37	REACTOME PI3K EVENTS IN ERBB4 SIGNALING	1.16827e-24
REACTOME CYTOSOLIC SULFONATION OF SMALL MOLECULES	3.59842e-07	KEGG GLYOXYLATE AND DICARBOXYLATE METABOLISM	8.96819e-09	PID AR PATHWAY	1.47822e-36	KEGG INOSITOL PHOSPHATE METABOLISM	3.22549e-24
REACTOME DIGESTION OF DIETARY CARBOHYDRATE	3.59842e-07	REACTOME GABA SYNTHESIS RELEASE REUPTAKE AND DEGRADATION	1.26364e-08	REACTOME NEUROTRANSMITTER RELEASE CYCLE	3.21777e-36	REACTOME G0 AND EARLY G1	5.74929e-24
REACTOME PEPTIDE LIGAND BINDING RECEPTORS	3.59842e-07	REACTOME PACKAGING OF TELOMERE ENDS	1.49405e-08	PID AJDISS 2PATHWAY	9.02623e-36	KEGG ACUTE MYELOID LEUKEMIA	7.92486e-24
REACTOME SYNTHESIS OF PIPS AT THE PLASMA MEMBRANE	3.59842e-07	KEGG GLYCOSPHINGOLIPID BIOSYNTHESIS GANGLIO SERIES	1.58933e-08	REACTOME SIGNALING BY RHO GTPASES	1.31206e-35	KEGG TRYPTOPHAN METABOLISM	8.50105e-24
REACTOME XENOBIOTICS	3.59842e-07	PID TGFBR PATHWAY	1.58933e-08	KEGG PROGESTERONE MEDIATED OOCYTE MATURATION	1.80733e-35	REACTOME DOWNREGULATION OF ERBB2 ERBB3 SIGNALING	8.59788e-24
SA TRKA RECEPTOR	3.59842e-07	REACTOME ADENYLATE CYCLASE INHIBITORY PATHWAY	1.58933e-08	REACTOME TRANS GOLGI NETWORK VESICLE BUDDING	1.80733e-35	REACTOME MEIOTIC SYNAPSIS	9.35648e-24
REACTOME RNA POL I PROMOTER OPENING	4.30465e-07	REACTOME HORMONE SENSITIVE LIPASE HSL MEDIATED TRIACYLGLYCEROL HYDROLYSIS	1.58933e-08	NABA PROTEOGLYCANS	1.87421e-35	PID TGFBR PATHWAY	1.15148e-23
KEGG GLYOXYLATE AND DICARBOXYLATE METABOLISM	4.61678e-07	REACTOME MEIOTIC SYNAPSIS	1.58933e-08	REACTOME ANDROGEN BIOSYNTHESIS	2.42917e-35	KEGG FC GAMMA R MEDIATED PHAGOCYTOSIS	1.39259e-23
BIOCARTA CYTOKINE PATHWAY	4.73209e-07	BIOCARTA AKAP95 PATHWAY	2.23327e-08	REACTOME MHC CLASS II ANTIGEN PRESENTATION	3.36138e-35	REACTOME SIGNALING BY ROBO RECEPTOR	1.39259e-23
KEGG LIMONENE AND PINENE DEGRADATION	4.73209e-07	REACTOME COPI MEDIATED TRANSPORT	2.66604e-08	KEGG ACUTE MYELOID LEUKEMIA	4.06221e-35	REACTOME PACKAGING OF TELOMERE ENDS	1.66651e-23
REACTOME HORMONE SENSITIVE LIPASE HSL MEDIATED TRIACYLGLYCEROL HYDROLYSIS	4.73209e-07	KEGG ACUTE MYELOID LEUKEMIA	3.00443e-08	KEGG DILATED CARDIOMYOPATHY	4.36777e-35	KEGG ASCORBATE AND ALDARATE METABOLISM	1.66768e-23
REACTOME UNBLOCKING OF NMDA RECEPTOR GLUTAMATE BINDING AND ACTIVATION	5.28843e-07	KEGG DRUG METABOLISM CYTOCHROME P450	3.00443e-08	PID HDAC CLASSII PATHWAY	5.3632e-35	NABA PROTEOGLYCANS	1.66768e-23
REACTOME COPI MEDIATED TRANSPORT	5.64034e-07	REACTOME TRYPTOPHAN CATABOLISM	3.54021e-08	PID HEDGEHOG GLI PATHWAY	1.36005e-34	REACTOME GAB1 SIGNALOSOME	1.66768e-23
REACTOME CLASS A1 RHODOPSIN LIKE RECEPTORS	5.82733e-07	REACTOME PIP3 ACTIVATES AKT SIGNALING	3.75517e-08	KEGG CALCIUM SIGNALING PATHWAY	1.78243e-34	SA TRKA RECEPTOR	3.61676e-23
REACTOME POST CHAPERONIN TUBULIN FOLDING PATHWAY	6.12989e-07	KEGG INOSITOL PHOSPHATE METABOLISM	4.16229e-08	REACTOME STRIATED MUSCLE CONTRACTION	1.81855e-34	REACTOME PI3K AKT ACTIVATION	1.23297e-22
REACTOME MEIOTIC RECOMBINATION	6.94955e-07	BIOCARTA EIF2 PATHWAY	5.29999e-08	REACTOME NOREPINEPHRINE NEUROTRANSMITTER RELEASE CYCLE	2.72975e-34	REACTOME COPI MEDIATED TRANSPORT	2.49065e-22
REACTOME GPVI MEDIATED ACTIVATION CASCADE	9.69756e-07	REACTOME DOWNREGULATION OF ERBB2 ERBB3 SIGNALING	5.29999e-08	REACTOME PACKAGING OF TELOMERE ENDS	3.611e-34	KEGG CELL CYCLE	4.41377e-22
REACTOME AMYLOIDS	1.0116e-06	REACTOME PI3K EVENTS IN ERBB2 SIGNALING	5.29999e-08	PID AURORA A PATHWAY	1.04244e-33	BIOCARTA NDKDYNAMIN PATHWAY	4.65736e-22
REACTOME G0 AND EARLY G1	1.0116e-06	REACTOME TERMINATION OF O GLYCAN BIOSYNTHESIS	8.14941e-08	PID P75 NTR PATHWAY	1.60517e-33	REACTOME PI3K EVENTS IN ERBB2 SIGNALING	6.16596e-22
REACTOME GPCR LIGAND BINDING	1.02314e-06	SA TRKA RECEPTOR	1.08379e-07	KEGG DRUG METABOLISM CYTOCHROME P450	2.45183e-33	REACTOME O LINKED GLYCOSYLATION OF MUCINS	7.89807e-22
REACTOME MEIOSIS	1.33375e-06	KEGG FC GAMMA R MEDIATED PHAGOCYTOSIS	1.60374e-07	REACTOME DAG AND IP3 SIGNALING	4.331e-33	REACTOME MHC CLASS II ANTIGEN PRESENTATION	9.41561e-22
KEGG NEUROACTIVE LIGAND RECEPTOR INTERACTION	1.43018e-06	REACTOME SIGNALING BY NOTCH3	1.77315e-07	KEGG TRYPTOPHAN METABOLISM	5.12564e-33	REACTOME TRANS GOLGI NETWORK VESICLE BUDDING	1.06435e-21
REACTOME ACTIVATION OF NMDA RECEPTOR UPON GLUTAMATE BINDING AND POSTSYNAPTIC EVENTS	1.62796e-06	KEGG SULFUR METABOLISM	1.82287e-07	KEGG TYROSINE METABOLISM	5.67535e-33	REACTOME CYTOSOLIC SULFONATION OF SMALL MOLECULES	1.12397e-21
REACTOME SEROTONIN RECEPTORS	1.9737e-06	KEGG LIMONENE AND PINENE DEGRADATION	2.04145e-07	KEGG FC GAMMA R MEDIATED PHAGOCYTOSIS	5.7898e-33	KEGG ECM RECEPTOR INTERACTION	1.3727e-21
REACTOME G ALPHA S SIGNALLING EVENTS	2.09168e-06	REACTOME MEIOSIS	2.72631e-07	PID SYNDECAN 2 PATHWAY	7.46595e-33	KEGG DRUG METABOLISM CYTOCHROME P450	1.39398e-21
REACTOME DOWNREGULATION OF ERBB2 ERBB3 SIGNALING	2.12219e-06	REACTOME NOREPINEPHRINE NEUROTRANSMITTER RELEASE CYCLE	3.19391e-07	PID LIS1 PATHWAY	1.35918e-32	KEGG PROGESTERONE MEDIATED OOCYTE MATURATION	1.56002e-21
REACTOME PHASE1 FUNCTIONALIZATION OF COMPOUNDS	2.17801e-06	REACTOME ETHANOL OXIDATION	3.205e-07	KEGG DORSO VENTRAL AXIS FORMATION	2.88981e-32	REACTOME STRIATED MUSCLE CONTRACTION	2.74302e-21
REACTOME PI METABOLISM	2.38005e-06	PID AR TF PATHWAY	4.15364e-07	REACTOME HS GAG BIOSYNTHESIS	2.88981e-32	KEGG CITRATE CYCLE TCA CYCLE	3.37778e-21
REACTOME AKT PHOSPHORYLATES TARGETS IN THE CYTOSOL	2.55989e-06	KEGG NICOTINATE AND NICOTINAMIDE METABOLISM	4.58392e-07	KEGG ECM RECEPTOR INTERACTION	4.0287e-32	ST GA13 PATHWAY	3.37778e-21
BIOCARTA MTA3 PATHWAY	2.68561e-06	REACTOME PHASE1 FUNCTIONALIZATION OF COMPOUNDS	4.58392e-07	REACTOME RNA POL I PROMOTER OPENING	4.67319e-32	PID CXCR3 PATHWAY	4.03456e-21
REACTOME AMINE LIGAND BINDING RECEPTORS	2.82931e-06	REACTOME APOPTOTIC CLEAVAGE OF CELL ADHESION PROTEINS	4.96044e-07	KEGG HYPERTROPHIC CARDIOMYOPATHY HCM	5.04877e-32	KEGG PHOSPHATIDYLINOSITOL SIGNALING SYSTEM	4.52427e-21
KEGG ANTIGEN PROCESSING AND PRESENTATION	3.15115e-06	KEGG MTOR SIGNALING PATHWAY	5.17392e-07	REACTOME CELL CYCLE	5.04877e-32	REACTOME MEIOSIS	5.67395e-21
KEGG INOSITOL PHOSPHATE METABOLISM	3.15115e-06	KEGG TRYPTOPHAN METABOLISM	5.17392e-07	REACTOME HS GAG DEGRADATION	5.27192e-32	BIOCARTA AKAP95 PATHWAY	7.04777e-21
PID CONE PATHWAY	3.15115e-06	REACTOME RNA POL I PROMOTER OPENING	5.66563e-07	REACTOME GABA SYNTHESIS RELEASE REUPTAKE AND DEGRADATION	6.81538e-32	PID S1P S1P3 PATHWAY	7.04777e-21
REACTOME NEUROTRANSMITTER RECEPTOR BINDING AND DOWNSTREAM TRANSMISSION IN THE POSTSYNAPTIC CELL	3.15115e-06	REACTOME REGULATION OF SIGNALING BY CBL	6.59756e-07	REACTOME GOLGI ASSOCIATED VESICLE BIOGENESIS	7.17527e-32	REACTOME SPHINGOLIPID DE NOVO BIOSYNTHESIS	7.45274e-21
KEGG ACUTE MYELOID LEUKEMIA	3.32668e-06	PID INTEGRIN5 PATHWAY	6.68356e-07	REACTOME SIGNALING BY ROBO RECEPTOR	7.58123e-32	KEGG HYPERTROPHIC CARDIOMYOPATHY HCM	8.88071e-21
REACTOME CYTOCHROME P450 ARRANGED BY SUBSTRATE TYPE	3.32668e-06	REACTOME CYTOSOLIC SULFONATION OF SMALL MOLECULES	6.99148e-07	PID P73PATHWAY	7.65116e-32	REACTOME PHASE1 FUNCTIONALIZATION OF COMPOUNDS	8.88071e-21
REACTOME NEF MEDIATED DOWNREGULATION OF MHC CLASS I COMPLEX CELL SURFACE EXPRESSION	3.68702e-06	REACTOME NEF MEDIATED DOWNREGULATION OF MHC CLASS I COMPLEX CELL SURFACE EXPRESSION	6.99148e-07	REACTOME CHROMOSOME MAINTENANCE	2.84052e-31	KEGG DILATED CARDIOMYOPATHY	9.35564e-21
REACTOME ORGANIC CATION ANION ZWITTERION TRANSPORT	3.84641e-06	REACTOME PKB MEDIATED EVENTS	8.75825e-07	PID S1P META PATHWAY	6.17574e-31	SIG PIP3 SIGNALING IN B LYMPHOCYTES	9.50502e-21
REACTOME SYNTHESIS SECRETION AND DEACYLATION OF GHRELIN	3.84641e-06	REACTOME ENERGY DEPENDENT REGULATION OF MTOR BY LKB1 AMPK	9.1682e-07	KEGG SULFUR METABOLISM	1.02015e-30	REACTOME RNA POL I PROMOTER OPENING	1.07832e-20
NABA SECRETED FACTORS	4.40108e-06	REACTOME TRANS GOLGI NETWORK VESICLE BUDDING	1.20056e-06	KEGG GLYOXYLATE AND DICARBOXYLATE METABOLISM	1.0849e-30	BIOCARTA CK1 PATHWAY	1.46658e-20
REACTOME ENERGY DEPENDENT REGULATION OF MTOR BY LKB1 AMPK	4.40108e-06	REACTOME SYNTHESIS OF PIPS AT THE PLASMA MEMBRANE	1.21756e-06	KEGG HISTIDINE METABOLISM	1.53387e-30	PID AR PATHWAY	1.46658e-20
PID AR TF PATHWAY	4.87247e-06	REACTOME CTLA4 INHIBITORY SIGNALING	1.25772e-06	REACTOME G ALPHA Z SIGNALLING EVENTS	2.03278e-30	REACTOME GOLGI ASSOCIATED VESICLE BIOGENESIS	1.8288e-20
REACTOME GPCR DOWNSTREAM SIGNALING	5.01055e-06	REACTOME NEUROTRANSMITTER RELEASE CYCLE	1.25772e-06	KEGG SPHINGOLIPID METABOLISM	2.73694e-30	REACTOME G ALPHA S SIGNALLING EVENTS	2.07933e-20
KEGG DORSO VENTRAL AXIS FORMATION	5.24274e-06	NABA PROTEOGLYCANS	1.32381e-06	PID FCER1 PATHWAY	2.89359e-30	KEGG PROSTATE CANCER	2.33859e-20
REACTOME G ALPHA I SIGNALLING EVENTS	5.64697e-06	SIG PIP3 SIGNALING IN B LYMPHOCYTES	1.34471e-06	KEGG PENTOSE PHOSPHATE PATHWAY	4.44263e-30	PID INSULIN PATHWAY	2.33859e-20
PID INTEGRIN5 PATHWAY	5.81907e-06	KEGG RETINOL METABOLISM	1.37801e-06	BIOCARTA AKAP13 PATHWAY	4.45285e-30	REACTOME SYNTHESIS OF PC	2.33859e-20
KEGG STEROID HORMONE BIOSYNTHESIS	6.02258e-06	REACTOME AMYLOIDS	1.37801e-06	BIOCARTA G2 PATHWAY	4.59615e-30	KEGG LIMONENE AND PINENE DEGRADATION	2.33883e-20
KEGG GLYCEROLIPID METABOLISM	7.23005e-06	REACTOME BIOLOGICAL OXIDATIONS	1.37801e-06	REACTOME APC C CDC20 MEDIATED DEGRADATION OF MITOTIC PROTEINS	4.86538e-30	KEGG LYSINE DEGRADATION	2.37676e-20
KEGG METABOLISM OF XENOBIOTICS BY CYTOCHROME P450	7.23005e-06	KEGG PROSTATE CANCER	1.47313e-06	PID CXCR3 PATHWAY	5.28436e-30	KEGG NICOTINATE AND NICOTINAMIDE METABOLISM	2.46852e-20
REACTOME TRANSMISSION ACROSS CHEMICAL SYNAPSES	7.82938e-06	PID S1P S1P3 PATHWAY	1.47313e-06	REACTOME MEIOSIS	5.31746e-30	KEGG VALINE LEUCINE AND ISOLEUCINE DEGRADATION	3.32671e-20
REACTOME TRYPTOPHAN CATABOLISM	9.5186e-06	ST WNT BETA CATENIN PATHWAY	1.47313e-06	PID INTEGRIN2 PATHWAY	6.2778e-30	KEGG RETINOL METABOLISM	3.6877e-20
KEGG DRUG METABOLISM CYTOCHROME P450	1.10831e-05	REACTOME PEPTIDE LIGAND BINDING RECEPTORS	1.49658e-06	PID FOXM1 PATHWAY	6.88383e-30	REACTOME MITOTIC PROMETAPHASE	3.73501e-20
REACTOME SIGNALING BY NOTCH2	1.10831e-05	REACTOME PLC BETA MEDIATED EVENTS	1.49658e-06	REACTOME MITOTIC PROMETAPHASE	6.88383e-30	REACTOME CELL SURFACE INTERACTIONS AT THE VASCULAR WALL	3.85359e-20
KEGG TRYPTOPHAN METABOLISM	1.16888e-05	PID RHOA REG PATHWAY	1.51993e-06	REACTOME CELL CYCLE MITOTIC	6.9301e-30	KEGG MTOR SIGNALING PATHWAY	3.92027e-20
KEGG MTOR SIGNALING PATHWAY	1.19622e-05	REACTOME PI METABOLISM	1.51993e-06	REACTOME CHONDROITIN SULFATE DERMATAN SULFATE METABOLISM	7.76464e-30	REACTOME TRYPTOPHAN CATABOLISM	4.33367e-20
KEGG AUTOIMMUNE THYROID DISEASE	1.20883e-05	REACTOME TELOMERE MAINTENANCE	1.52007e-06	REACTOME CYCLIN A B1 ASSOCIATED EVENTS DURING G2 M TRANSITION	1.22313e-29	KEGG BUTANOATE METABOLISM	5.4476e-20
REACTOME BIOLOGICAL OXIDATIONS	1.23924e-05	KEGG CITRATE CYCLE TCA CYCLE	1.58167e-06	KEGG O GLYCAN BIOSYNTHESIS	1.48161e-29	REACTOME NEUROTRANSMITTER RELEASE CYCLE	5.61807e-20
KEGG OLFACTORY TRANSDUCTION	1.37588e-05	REACTOME G0 AND EARLY G1	1.64993e-06	PID INTEGRIN3 PATHWAY	2.11705e-29	KEGG SMALL CELL LUNG CANCER	7.02363e-20
REACTOME GAB1 SIGNALOSOME	1.51931e-05	REACTOME REGULATION OF PYRUVATE DEHYDROGENASE PDH COMPLEX	1.65966e-06	BIOCARTA EIF2 PATHWAY	2.58621e-29	SIG CHEMOTAXIS	7.37634e-20
REACTOME NOREPINEPHRINE NEUROTRANSMITTER RELEASE CYCLE	1.51931e-05	KEGG PROGESTERONE MEDIATED OOCYTE MATURATION	1.76904e-06	KEGG VALINE LEUCINE AND ISOLEUCINE DEGRADATION	5.18672e-29	KEGG DORSO VENTRAL AXIS FORMATION	8.23492e-20
REACTOME TIE2 SIGNALING	1.51931e-05	REACTOME AKT PHOSPHORYLATES TARGETS IN THE CYTOSOL	1.78966e-06	KEGG PHOSPHATIDYLINOSITOL SIGNALING SYSTEM	7.40406e-29	REACTOME METABOLISM OF STEROID HORMONES AND VITAMINS A AND D	8.23492e-20
REACTOME ANDROGEN BIOSYNTHESIS	1.53293e-05	KEGG DILATED CARDIOMYOPATHY	1.88226e-06	KEGG NICOTINATE AND NICOTINAMIDE METABOLISM	7.87108e-29	REACTOME DOWNSTREAM SIGNAL TRANSDUCTION	8.49397e-20
REACTOME SYNTHESIS OF PC	1.53293e-05	PID PDGFRA PATHWAY	1.88226e-06	PID LKB1 PATHWAY	1.07587e-28	PID AURORA B PATHWAY	8.529e-20
BIOCARTA AKAP95 PATHWAY	1.59362e-05	PID LKB1 PATHWAY	2.3625e-06	PID REELIN PATHWAY	1.07719e-28	NABA CORE MATRISOME	9.22272e-20
BIOCARTA INFLAM PATHWAY	1.78039e-05	REACTOME E2F MEDIATED REGULATION OF DNA REPLICATION	2.41853e-06	REACTOME RNA POL I TRANSCRIPTION	1.1324e-28	KEGG GLYOXYLATE AND DICARBOXYLATE METABOLISM	9.48855e-20
KEGG FC GAMMA R MEDIATED PHAGOCYTOSIS	1.78039e-05	REACTOME G ALPHA I SIGNALLING EVENTS	2.41853e-06	REACTOME APOPTOTIC CLEAVAGE OF CELL ADHESION PROTEINS	1.46166e-28	KEGG NOTCH SIGNALING PATHWAY	1.04261e-19
KEGG NICOTINATE AND NICOTINAMIDE METABOLISM	2.08743e-05	REACTOME MEIOTIC RECOMBINATION	2.41853e-06	KEGG COLORECTAL CANCER	1.73998e-28	PID INTEGRIN A4B1 PATHWAY	1.04261e-19
REACTOME PI3K AKT ACTIVATION	2.08743e-05	REACTOME STRIATED MUSCLE CONTRACTION	2.41853e-06	REACTOME REGULATION OF MITOTIC CELL CYCLE	2.13757e-28	BIOCARTA EIF2 PATHWAY	1.15043e-19
REACTOME RNA POL I TRANSCRIPTION	2.08743e-05	REACTOME BETA DEFENSINS	2.64067e-06	NABA CORE MATRISOME	2.5533e-28	REACTOME ADENYLATE CYCLASE INHIBITORY PATHWAY	1.66733e-19
SIG CHEMOTAXIS	2.08743e-05	KEGG LEUKOCYTE TRANSENDOTHELIAL MIGRATION	2.67117e-06	REACTOME MUSCLE CONTRACTION	2.71104e-28	PID AURORA A PATHWAY	1.69029e-19
REACTOME INHIBITION OF THE PROTEOLYTIC ACTIVITY OF APC C REQUIRED FOR THE ONSET OF ANAPHASE BY MITOTIC SPINDLE CHECKPOINT COMPONENTS	2.30481e-05	REACTOME INHIBITION OF THE PROTEOLYTIC ACTIVITY OF APC C REQUIRED FOR THE ONSET OF ANAPHASE BY MITOTIC SPINDLE CHECKPOINT COMPONENTS	2.67117e-06	REACTOME TELOMERE MAINTENANCE	2.76499e-28	KEGG COLORECTAL CANCER	1.83241e-19
KEGG RENAL CELL CARCINOMA	2.32651e-05	PID S1P S1P1 PATHWAY	3.49005e-06	PID INTEGRIN5 PATHWAY	2.78342e-28	KEGG TYPE II DIABETES MELLITUS	1.83241e-19
REACTOME TERMINATION OF O GLYCAN BIOSYNTHESIS	2.37844e-05	KEGG BUTANOATE METABOLISM	3.58297e-06	REACTOME POST CHAPERONIN TUBULIN FOLDING PATHWAY	2.78342e-28	KEGG CHRONIC MYELOID LEUKEMIA	2.06597e-19
KEGG BUTANOATE METABOLISM	2.3813e-05	PID AURORA B PATHWAY	3.58297e-06	KEGG AXON GUIDANCE	2.88038e-28	REACTOME STEROID HORMONES	2.06597e-19
BIOCARTA STEM PATHWAY	2.71077e-05	REACTOME REGULATION OF COMPLEMENT CASCADE	3.58297e-06	BIOCARTA ARAP PATHWAY	3.27524e-28	REACTOME PLC BETA MEDIATED EVENTS	2.20911e-19
BIOCARTA NDKDYNAMIN PATHWAY	3.031e-05	PID INTEGRIN CS PATHWAY	3.65641e-06	KEGG CITRATE CYCLE TCA CYCLE	3.27524e-28	REACTOME DEGRADATION OF THE EXTRACELLULAR MATRIX	2.62175e-19
REACTOME PI3K EVENTS IN ERBB4 SIGNALING	3.031e-05	KEGG ALDOSTERONE REGULATED SODIUM REABSORPTION	3.85766e-06	PID NFAT 3PATHWAY	3.57438e-28	REACTOME SIGNALING BY NOTCH3	3.14451e-19
KEGG SULFUR METABOLISM	3.36215e-05	REACTOME G ALPHA S SIGNALLING EVENTS	3.98211e-06	KEGG GAP JUNCTION	4.17138e-28	REACTOME RNA POL I TRANSCRIPTION	3.15774e-19
REACTOME SIGNALING BY NOTCH4	3.51165e-05	REACTOME GOLGI ASSOCIATED VESICLE BIOGENESIS	4.44494e-06	REACTOME REGULATION OF APOPTOSIS	6.64092e-28	KEGG SULFUR METABOLISM	3.22545e-19
REACTOME SIGNALING BY GPCR	3.97295e-05	KEGG RENAL CELL CARCINOMA	4.44501e-06	BIOCARTA DREAM PATHWAY	8.03431e-28	PID LIS1 PATHWAY	3.24063e-19
REACTOME ETHANOL OXIDATION	4.20892e-05	REACTOME METABOLISM OF STEROID HORMONES AND VITAMINS A AND D	4.44887e-06	KEGG TGF BETA SIGNALING PATHWAY	8.03431e-28	KEGG WNT SIGNALING PATHWAY	3.51394e-19
KEGG PHOSPHATIDYLINOSITOL SIGNALING SYSTEM	4.91478e-05	KEGG STEROID HORMONE BIOSYNTHESIS	4.46843e-06	REACTOME MEMBRANE TRAFFICKING	8.44416e-28	BIOCARTA CELLCYCLE PATHWAY	3.57429e-19
REACTOME BETA DEFENSINS	5.0295e-05	PID CXCR3 PATHWAY	4.46843e-06	PID ANGIOPOIETIN RECEPTOR PATHWAY	9.35941e-28	REACTOME CELL CYCLE	3.65513e-19
REACTOME INTERACTION BETWEEN L1 AND ANKYRINS	5.18682e-05	REACTOME GPCR LIGAND BINDING	4.46843e-06	REACTOME PHASE1 FUNCTIONALIZATION OF COMPOUNDS	1.18363e-27	BIOCARTA HIF PATHWAY	3.93514e-19
REACTOME PIP3 ACTIVATES AKT SIGNALING	5.7375e-05	REACTOME MHC CLASS II ANTIGEN PRESENTATION	4.58706e-06	REACTOME CELL CYCLE CHECKPOINTS	1.41211e-27	REACTOME CYCLIN A B1 ASSOCIATED EVENTS DURING G2 M TRANSITION	3.98167e-19
REACTOME STRIATED MUSCLE CONTRACTION	5.8098e-05	BIOCARTA KREB PATHWAY	4.93236e-06	REACTOME GLYCOSAMINOGLYCAN METABOLISM	1.70984e-27	REACTOME TELOMERE MAINTENANCE	3.98167e-19
BIOCARTA EIF2 PATHWAY	5.87778e-05	KEGG COLORECTAL CANCER	5.03364e-06	PID TAP63 PATHWAY	1.98645e-27	REACTOME IL 3 5 AND GM CSF SIGNALING	4.2913e-19
REACTOME CHEMOKINE RECEPTORS BIND CHEMOKINES	6.5734e-05	ST GA13 PATHWAY	5.33298e-06	KEGG TYPE II DIABETES MELLITUS	2.22167e-27	REACTOME GABA SYNTHESIS RELEASE REUPTAKE AND DEGRADATION	4.57116e-19
SIG PIP3 SIGNALING IN B LYMPHOCYTES	7.74028e-05	REACTOME CLASS A1 RHODOPSIN LIKE RECEPTORS	5.5279e-06	REACTOME INHIBITION OF THE PROTEOLYTIC ACTIVITY OF APC C REQUIRED FOR THE ONSET OF ANAPHASE BY MITOTIC SPINDLE CHECKPOINT COMPONENTS	2.24557e-27	PID LKB1 PATHWAY	4.64954e-19
BIOCARTA RARRXR PATHWAY	8.05774e-05	REACTOME RNA POL I TRANSCRIPTION	5.66909e-06	KEGG ALDOSTERONE REGULATED SODIUM REABSORPTION	2.25928e-27	KEGG RENAL CELL CARCINOMA	5.01887e-19
REACTOME ADENYLATE CYCLASE INHIBITORY PATHWAY	8.05774e-05	SIG IL4RECEPTOR IN B LYPHOCYTES	5.66909e-06	REACTOME AUTODEGRADATION OF CDH1 BY CDH1 APC C	2.25928e-27	REACTOME CHROMOSOME MAINTENANCE	5.36803e-19
REACTOME MHC CLASS II ANTIGEN PRESENTATION	8.05774e-05	KEGG METABOLISM OF XENOBIOTICS BY CYTOCHROME P450	5.7055e-06	BIOCARTA AMI PATHWAY	2.62642e-27	PID WNT SIGNALING PATHWAY	5.82957e-19
REACTOME PHOSPHORYLATION OF THE APC C	8.29075e-05	ST B CELL ANTIGEN RECEPTOR	5.7055e-06	KEGG ASCORBATE AND ALDARATE METABOLISM	2.70913e-27	REACTOME FACTORS INVOLVED IN MEGAKARYOCYTE DEVELOPMENT AND PLATELET PRODUCTION	6.00445e-19
KEGG NON SMALL CELL LUNG CANCER	8.34011e-05	REACTOME PHOSPHORYLATION OF THE APC C	5.75183e-06	PID A6B1 A6B4 INTEGRIN PATHWAY	5.15508e-27	REACTOME PIP3 ACTIVATES AKT SIGNALING	6.00445e-19
NABA ECM REGULATORS	8.82626e-05	BIOCARTA MTOR PATHWAY	5.84687e-06	KEGG INOSITOL PHOSPHATE METABOLISM	5.31873e-27	KEGG APOPTOSIS	6.04151e-19
NABA MATRISOME ASSOCIATED	9.1524e-05	REACTOME LYSOSOME VESICLE BIOGENESIS	5.84687e-06	REACTOME G ALPHA I SIGNALLING EVENTS	9.0977e-27	PID E2F PATHWAY	6.04151e-19
NABA PROTEOGLYCANS	9.7673e-05	KEGG ANTIGEN PROCESSING AND PRESENTATION	6.16505e-06	KEGG PROSTATE CANCER	1.03292e-26	PID S1P S1P1 PATHWAY	6.07654e-19
PID BMP PATHWAY	9.87394e-05	REACTOME FACTORS INVOLVED IN MEGAKARYOCYTE DEVELOPMENT AND PLATELET PRODUCTION	6.16505e-06	PID FOXO PATHWAY	1.20437e-26	PID TCPTP PATHWAY	6.07654e-19
REACTOME COMMON PATHWAY	9.87394e-05	KEGG DORSO VENTRAL AXIS FORMATION	6.34461e-06	REACTOME PI METABOLISM	1.20437e-26	PID INTEGRIN5 PATHWAY	6.24049e-19
REACTOME GABA RECEPTOR ACTIVATION	0.00010079	BIOCARTA SKP2E2F PATHWAY	6.48921e-06	PID AURORA B PATHWAY	1.24873e-26	KEGG HISTIDINE METABOLISM	6.44144e-19
REACTOME ACTIVATED NOTCH1 TRANSMITS SIGNAL TO THE NUCLEUS	0.000106323	PID MTOR 4PATHWAY	6.48921e-06	BIOCARTA AKAP95 PATHWAY	1.39397e-26	PID NETRIN PATHWAY	7.62722e-19
REACTOME APC C CDC20 MEDIATED DEGRADATION OF CYCLIN B	0.000129153	REACTOME UNBLOCKING OF NMDA RECEPTOR GLUTAMATE BINDING AND ACTIVATION	6.48921e-06	KEGG SMALL CELL LUNG CANCER	1.71464e-26	REACTOME AMYLOIDS	7.76439e-19
REACTOME O LINKED GLYCOSYLATION OF MUCINS	0.000132409	REACTOME TRANSMISSION ACROSS CHEMICAL SYNAPSES	6.84391e-06	KEGG ARRHYTHMOGENIC RIGHT VENTRICULAR CARDIOMYOPATHY ARVC	2.18325e-26	REACTOME PI METABOLISM	7.97483e-19
BIOCARTA ERYTH PATHWAY	0.000141568	REACTOME IL 3 5 AND GM CSF SIGNALING	7.55436e-06	REACTOME GABA B RECEPTOR ACTIVATION	2.5896e-26	REACTOME CELL CYCLE MITOTIC	8.3061e-19
REACTOME GABA SYNTHESIS RELEASE REUPTAKE AND DEGRADATION	0.000142126	REACTOME CYCLIN A B1 ASSOCIATED EVENTS DURING G2 M TRANSITION	8.12286e-06	REACTOME MITOTIC G2 G2 M PHASES	2.8413e-26	PID SYNDECAN 2 PATHWAY	8.41323e-19
REACTOME PRESYNAPTIC NICOTINIC ACETYLCHOLINE RECEPTORS	0.000146292	REACTOME G1 S SPECIFIC TRANSCRIPTION	8.43038e-06	KEGG LYSINE DEGRADATION	3.45326e-26	REACTOME BIOLOGICAL OXIDATIONS	9.76283e-19
REACTOME ACETYLCHOLINE BINDING AND DOWNSTREAM EVENTS	0.000146619	KEGG PHOSPHATIDYLINOSITOL SIGNALING SYSTEM	8.62454e-06	REACTOME MITOTIC G1 G1 S PHASES	3.78714e-26	KEGG COMPLEMENT AND COAGULATION CASCADES	1.20232e-18
REACTOME NEURONAL SYSTEM	0.000147713	BIOCARTA CK1 PATHWAY	8.75415e-06	KEGG SYSTEMIC LUPUS ERYTHEMATOSUS	3.82729e-26	REACTOME PI 3K CASCADE	1.20232e-18
BIOCARTA KREB PATHWAY	0.000149501	REACTOME CHEMOKINE RECEPTORS BIND CHEMOKINES	8.80244e-06	NABA BASEMENT MEMBRANES	4.24366e-26	KEGG B CELL RECEPTOR SIGNALING PATHWAY	1.22467e-18
REACTOME THE ACTIVATION OF ARYLSULFATASES	0.000149501	KEGG GAP JUNCTION	8.89486e-06	REACTOME ACTIVATION OF RAC	4.33109e-26	REACTOME TRANSMISSION ACROSS CHEMICAL SYNAPSES	1.27221e-18
REACTOME NEUROTRANSMITTER RELEASE CYCLE	0.000169203	REACTOME CHROMOSOME MAINTENANCE	9.15305e-06	PID BMP PATHWAY	6.97432e-26	KEGG STEROID HORMONE BIOSYNTHESIS	1.43321e-18
REACTOME CYCLIN A B1 ASSOCIATED EVENTS DURING G2 M TRANSITION	0.000173786	REACTOME HS GAG BIOSYNTHESIS	9.15305e-06	REACTOME APC C CDH1 MEDIATED DEGRADATION OF CDC20 AND OTHER APC C CDH1 TARGETED PROTEINS IN LATE MITOSIS EARLY G1	7.00313e-26	KEGG GLYCOSAMINOGLYCAN BIOSYNTHESIS KERATAN SULFATE	1.46199e-18
KEGG PROGESTERONE MEDIATED OOCYTE MATURATION	0.000175125	PID A6B1 A6B4 INTEGRIN PATHWAY	9.18646e-06	KEGG RETINOL METABOLISM	8.00096e-26	REACTOME ABCA TRANSPORTERS IN LIPID HOMEOSTASIS	1.68958e-18
KEGG PROSTATE CANCER	0.000193099	REACTOME STEROID HORMONES	9.18646e-06	REACTOME HEPARAN SULFATE HEPARIN HS GAG METABOLISM	8.15864e-26	REACTOME DAG AND IP3 SIGNALING	2.02099e-18
REACTOME GOLGI ASSOCIATED VESICLE BIOGENESIS	0.000196512	KEGG ENDOMETRIAL CANCER	1.02594e-05	REACTOME MEIOTIC RECOMBINATION	9.66745e-26	PID S1P META PATHWAY	2.18275e-18
KEGG GAP JUNCTION	0.000224217	REACTOME PERK REGULATED GENE EXPRESSION	1.02594e-05	REACTOME SIGNALING BY PDGF	1.04154e-25	KEGG ENDOMETRIAL CANCER	2.18631e-18
KEGG LEUKOCYTE TRANSENDOTHELIAL MIGRATION	0.000224428	KEGG CELL CYCLE	1.15067e-05	KEGG CHRONIC MYELOID LEUKEMIA	1.05146e-25	REACTOME MEIOTIC RECOMBINATION	2.20055e-18
NABA MATRISOME	0.000242089	KEGG HISTIDINE METABOLISM	1.15067e-05	BIOCARTA PPARA PATHWAY	1.05749e-25	KEGG NON SMALL CELL LUNG CANCER	2.47307e-18
REACTOME PKB MEDIATED EVENTS	0.000242089	PID RET PATHWAY	1.15336e-05	REACTOME A TETRASACCHARIDE LINKER SEQUENCE IS REQUIRED FOR GAG SYNTHESIS	1.06274e-25	REACTOME CD28 CO STIMULATION	2.50202e-18
ST G ALPHA S PATHWAY	0.000242089	REACTOME CD28 CO STIMULATION	1.23052e-05	REACTOME DOUBLE STRAND BREAK REPAIR	1.1348e-25	REACTOME SIGNALING BY RHO GTPASES	2.54986e-18
[truncated: 1,194 more rows]

## Sheet: Table S4
Table S4. Results of the exploratory factor analysis of the deregulated GO terms in serous carcinoma.
[truncated: 220 more rows]

[truncated: 2 more sheets: Table S5, Table S6]
